## Diversity of satellite glia in sympathetic and sensory ganglia

Aurelia A Mapps<sup>1,3</sup>, Michael B Thomsen<sup>1,2,3</sup>, Erica Boehm<sup>1</sup>, Haiqing Zhao<sup>1</sup>, Samer Hattar<sup>2</sup>, and Rejji Kuruvilla<sup>1,\*</sup>

<sup>1</sup>Department of Biology, Johns Hopkins University, 3400 N. Charles St, 200 Mudd Hall, Baltimore, Maryland 21218, USA

<sup>2</sup>Section on Light and Circadian Rhythms (SLCR), National Institute of Mental Health, NIH, Bethesda, Maryland 20892, USA

<sup>3</sup>These authors contributed equally

\*Corresponding author and lead contact:

Rejji Kuruvilla

rkuruvilla@jhu.edu

Running Title: Molecular heterogeneity of satellite glia

## **ABSTRACT**

Satellite glia are the major glial type found in ganglia of the peripheral nervous system and wrap around cell bodies of sympathetic and sensory neurons that are very diverse. Other than their close physical association with peripheral neurons, little is known about this glial population. Here, we performed single cell RNA sequencing analysis and identified five different populations of satellite glia from sympathetic and sensory ganglia. We identified three shared populations of satellite glia enriched in immune-response genes, immediate-early genes and ion channels/ECM-interactors, respectively. Sensory- and sympathetic-specific satellite glia are differentially enriched for modulators of lipid synthesis and metabolism. Sensory glia are also specifically enriched for genes involved in glutamate turnover. Further, satellite glia and Schwann cells can be distinguished by unique transcriptional signatures. This study reveals remarkable heterogeneity of satellite glia in the peripheral nervous system.

## INTRODUCTION

In the peripheral nervous system, the sensory arm is essential for transducing a wide variety of environmental stimuli from the outside world to the central nervous system, while the sympathetic division relays motor commands from the central nervous system to diverse peripheral organs/tissues to mobilize the “fight or flight” response and maintain body homeostasis in response to a continuously changing environment (Goldstein, 2013; Marmigere and Ernfors, 2007; Usoskin et al., 2015). Sympathetic and sensory neurons residing in their respective peripheral ganglia are remarkably diverse with respect to morphological, molecular, and electrophysiological properties, consistent with their distinct functions (Ernsberger et al., 2020; Liu and Ma, 2011). In addition to primary neurons, sympathetic and sensory ganglia contain two major glial cell types, satellite glia and Schwann cells, which are closely associated with their neuronal neighbors and influence a wide range of neuronal functions (Hanani and Spray, 2020; Jessen and Mirsky, 2005). While the diversity of neurons in sympathetic versus sensory ganglia is well-appreciated, it remains unknown if there are molecular differences between the associated glial cell types, particularly the satellite glia, that reflect ganglion-specific functions.

Satellite glial and Schwann cells are both derived from multipotent neural crest precursors during development (Jessen and Mirsky, 2005). Satellite glial cells wrap tightly around neuronal cell bodies, whereas Schwann cells ensheath axonal processes of peripheral neurons (Hanani and Spray, 2020; Pannese, 1981). While Schwann cells have been intensely investigated, and have well-documented roles in myelination, axon regeneration, and providing trophic and metabolic support to neurons (Jessen and Mirsky, 2005; Monk et al., 2015), the understanding of satellite glia has lagged far behind. Satellite glia have a unique architecture in that they form ring-like structures that completely wrap around individual neuronal cell bodies, with each neuron and associated satellite glia thought to form discrete structural and functional units (Hanani and Spray,

2020; Pannese, 1981). This intimate physical association implies that satellite glia can be critical regulators of neuronal connectivity, activity, homeostasis, and repair. Indeed, it has been proposed that satellite glia modulate ionic and neurotransmitter concentrations, promote neuronal morphogenesis during development, regulate synaptic transmission, and engulf dying neurons (Avraham et al., 2020; Enes et al., 2020; Hanani and Spray, 2020; Wu et al., 2009). However, knowledge about satellite glia functions, specifically *in vivo*, has been scarce. Several recent studies in sensory ganglia have suggested that satellite glia regulate chronic pain through modulating neuronal hyper-excitability and promote axon regeneration after peripheral nerve injury (Avraham et al., 2020; Kim et al., 2016).

Satellite glia wrap around sensory and sympathetic neurons, which are molecularly, functionally, and morphologically divergent populations. Sympathetic neurons, which are primarily noradrenergic, innervate peripheral organs and tissues to control various autonomic functions, including cardiac output, body temperature, regulation of blood glucose levels, and immune functions under basal conditions and in response to external stressors (Goldstein, 2013). Sensory neurons relay information about mechano-sensation, pain and temperature from the periphery to the brain (Liu and Ma, 2011; Usoskin et al., 2015). Morphologically, sympathetic neurons have an axon and multiple dendritic processes and form synapses with preganglionic neurons, whereas sensory neuron cell bodies extend a pseudo-unipolar axon which bifurcates to extend into the brain and periphery, respectively. In a key difference from sensory ganglia, satellite glia envelop the dendrites and synapses of neurons, in addition to cell bodies in sympathetic ganglia (Hanani, 2010). Despite the intimate association of satellite glial cells with peripheral neurons, there have been few investigations of whether differences exist in satellite glial cells from distinct peripheral ganglia.

Here, we utilized single cell transcriptome profiling and single molecule fluorescence *in situ* hybridization to comprehensively characterize satellite glial cell diversity in sensory and sympathetic ganglia. Our results reveal five types of satellite glia, including sensory-specific satellite glia, sympathetic-specific satellite glia, and three populations that are present in both ganglia. Sensory- and sympathetic-specific satellite glia are differentially enriched for modulators of lipid metabolism. Sensory glia are specifically enriched for genes involved in glutamate turnover, consistent with their association to glutamatergic neurons. We identify three populations of satellite glia that are present in both ganglia, each featuring enrichment of functionally distinct pathways, including immune-response genes, immediate-early genes, and ion channels/ECM-interactors, respectively. We also show that Schwann cells can be distinguished from satellite glia by hundreds of uniquely expressed genes. By providing a transcriptional atlas for satellite glia classification, this study reveals remarkable diversity in satellite glia across the peripheral nervous system and suggests that satellite glia are transcriptionally tuned to the functions of their respective ganglia.

## RESULTS

### *Cell types in sympathetic and sensory ganglia*

We prepared single cell suspensions from sympathetic (superior cervical ganglion, SCG) and sensory (dorsal root ganglion, DRG) ganglia from young adult mice and performed droplet-based high-throughput single cell RNA sequencing using the Drop-Seq protocol (Macosko et al., 2015) (**Figures S1A-B**). The Drop-Seq procedure was validated by 98.75% separation efficacy of mixed human and mouse cells (**Figure S1B**). Following quality control filtering, we obtained a total of 21,524 high quality single cell transcriptomes (13,435 SCG; 8,089 DRG) that were used as input for unsupervised clustering and dimensionality reduction with the Seurat package (**Figure 1A**).

This analysis identified numerous transcriptionally distinct cell populations divided between sensory and sympathetic tissues (**Figure 1B**). Major cell types of the peripheral nervous system were separated into nine large clusters based on the expression of canonical marker genes: satellite glial cells (*Plp1*, *Fabp7*), Schwann cells (*Plp1*, *Ncm1*), sympathetic neurons (*Snap25*, *Th*), sensory neurons (*Snap25*, *Calca*), vascular endothelial cells (*Ly6c1*), macrophages (*C1qb*), T-cells (*Trb2*), fibroblasts (*Dcn*), and mural cells (*Rgs5*) (**Figure 1C**) (Saunders et al., 2018; Vanlandewijck et al., 2018; Zeisel et al., 2018). Thus, our methodology is robust enough to isolate all known cell types from sympathetic and sensory ganglia.

We extracted sensory and sympathetic neurons and performed unsupervised clustering to identify cell type diversity contained within each class (**Figures 1D-E**). Within stellate and thoracic sympathetic ganglia, seven neuron types have been described to date, including five noradrenergic and two cholinergic populations (Furlan et al., 2016; Zeisel et al., 2018). Among SCG neurons, we identified all previously described five noradrenergic populations delineated by the expression of markers including *Th*, *Rarres1*, *Gfra2*, *Gfra3*, *Npy*, and *Enc1* (**Figures 1D and S2A**) (Furlan et al., 2016). However, we were unable to identify any cholinergic neurons, suggesting that cholinergic neurons are scarce in the SCG. Up to seventeen neuron types have been identified in sensory ganglia based on transcriptional profiles, and they are divided into three categories: peptidergic (8), non-peptidergic (6), and neurofilament-enriched (3) (Usoskin et al., 2015; Zeisel et al., 2018). We identified 12 types of sensory neurons corresponding to all three major categories including peptidergic (*Foxp2*, *Adcyap1*, *Mrgpra3*), non-peptidergic (*Th*, *Mrgprd*, *Nppb*), and neurofilament-enriched (*Nefh*, *Palm3*, *Trapp3c1*) (**Figures 1E and S2B**). In summary, our analyses of neuronal cell types from sensory and sympathetic ganglia are consistent with previous reports of neuronal diversity in the peripheral nervous system (Furlan et al., 2016; Usoskin et al., 2015; Zeisel et al., 2018).

### *Non-neuronal/non glial cell types in peripheral ganglia*

Non-neuronal cells were identified based on known gene expression signatures including vascular endothelial cells (*Ly6c1*, *Flt1*, *Cldn5*), mural cells (*Rgs5*, *Vtn*), fibroblasts (*Dcn*, *Lum*), T cells (*Trbc2*), macrophages (*C1qb*, *Ctss*), and epithelial cells (*Ki*, *Krt18*) (Zeisel et al., 2018) (**Figures 1C, 1F and S1C**). Epithelial cells and T-cells were found primarily in sympathetic samples, which may reflect a dissection artifact since these cell types reside outside of peripheral ganglia (**Figure 1G**). Pericytes, vascular smooth muscle cells, and macrophages showed limited or no differential gene expression between tissue of origin. We observed differences in gene expression between endothelial cells derived from sensory and sympathetic ganglia (**Figure 1G**), which may underlie observed differences in their vascular permeability (Kiernan, 1996).

Further, we identified a small cluster of cells that express several mitotic machinery components, including *Top2a* and *Mki67* (**Figures 1F and S1C-D**). Within this small cluster, we identified subsets of cells that contain gene expression signatures corresponding to T-cells, endothelial cells, erythrocytes, and satellite glial cells (**Figure S1D**). These results suggest that a subpopulation of satellite glia retain proliferative capacity in adult ganglia.

### *Satellite glia and Schwann cells have distinct transcriptional signatures*

Progress in understanding satellite glia functions has been hampered by the fact that they share many genetic markers with Schwann cells (Britsch et al., 2001; Hanani, 2010; Shi et al., 2008). While there are several genes that can be used to label satellite glial cells (e.g., *Glul*, *Gfap*, *S100b*, *Gja1*, *Plp1*, *Kcnj10*), most of these genes are also expressed in Schwann cells and/or other glial cell types in the central nervous system, most notably astrocytes (Hanani and Spray, 2020). To overcome this hurdle and isolate specific transcripts and functional pathways that distinguish

these glial cell types, we independently clustered all glial cells (**Figures 2A-B**) and identified >450 genes that were differentially expressed ( $p < 10^{-50}$ ) between Schwann cells and satellite glia (**Figure 2C, Table S1**). We found that the strongest and most significantly enriched transcript among satellite glial cells was fatty acid binding protein 7 (*Fabp7*) (**Figure 2C**), a fatty acid transporter that was previously identified as a marker of satellite glia (Avraham et al., 2020; Kurtz et al., 1994). In addition to *Fabp7*, satellite glia expressed high levels of genes associated with fatty acid synthesis including *ApoE*, an apolipoprotein which carries lipids and cholesterol to neurons, as well as *Dbi*, acyl-coA binding protein that regulates synapses, (**Table S1**), (Bouyakdan et al., 2019; Holtzman et al., 2012; Ioannou et al., 2019). Schwann cells were enriched for *Ncmamp* (non-compact myelin associated protein) (**Figure 2C**), a glycoprotein that is found in myelin of the peripheral nervous system which is localized to paranodal regions flanking nodes of Ranvier (Ryu et al., 2008). *Ncmamp* and other genes involved in myelination (*Mag*, *Mog*) were uniformly expressed within the Schwann cell cluster (**Table S1**), suggesting that we primarily isolated myelinating Schwann cells.

Schwann cells are readily separated from satellite glia in sensory ganglia, consistent with recent studies (Avraham et al., 2020). Due to their scarcity in sympathetic ganglia, Schwann cells could only be differentiated from satellite glia when we performed an integrated analysis with sensory ganglia (**Figures 2A-B**) (Satija et al., 2015; Stuart et al., 2019). These results suggest that Schwann cells are prevalent in sensory, but not sympathetic ganglia, a difference that may have important functional implications for modulation of neuronal connectivity, activity, and repair in these two systems.

To identify functional pathways that distinguish satellite glia and Schwann cells, we performed gene ontology analysis of all significantly enriched genes within each group (**Figures 2D-E and Table S1**). Satellite glia were enriched for genes associated with fatty acid metabolism



including chaperone proteins (*Fabp5*, *Fabp7*), elongases (*Elovl2*, *Elovl5*), desaturases (*Fads1*, *Fads2*, *Fads6*, *Scd1*, *Scd2*), and fatty acid synthase, *Fasn* (**Figure 2D, Table S1**). Furthermore, satellite glia specifically expressed genes involved in mitochondrial beta-oxidation (*Acaa2*, *Acadl*, *Acadm*, *Acsbg1*, *Eci1*) (**Figure 2D, Table S1**), which produces energy from fatty acids (Barber and Raben, 2019). Schwann cells were strongly enriched for genes involved in myelination (**Figure 2E**), including genes specific for sphingolipid synthesis (*Fa2h*, *Samd8*, *Sptlc2*, *Ugt8a*) (**Table S1**), which are abundant myelin components in both central and peripheral nervous systems (Giussani et al., 2021). Schwann cells also expressed fatty acid elongase genes (*Elovl1*, *Elovl7*) that were distinct from those expressed in satellite glia (**Table S1**). Combined, these data suggest that lipid synthesis in satellite glia and Schwann cell is specialized for neuronal compartments contacted by glial cells.

Satellite glia uniquely ensheathes cell bodies of peripheral neurons, while Schwann cells tightly wrap around axons, yet it is unknown if these contacts are driven by distinct cell adhesion molecules. We found that satellite glia were specifically enriched for 46 cell adhesion molecules, including known neuron-glia interactors (*Atp1b2*, *Ncam1*, *Chl1*, *Cadm1*, *Cadm2*, and *Cdh10*), and two genes (*Fbln5*, *Vcam1*) involved in endothelial cell adhesion (Albig and Schiemann, 2004; Batiuk et al., 2020; Hillenbrand et al., 1999; Kokovay et al., 2012; Sukhanov et al., 2021) (**Figure 2D and Table S1**). Some of the cell adhesion molecules (*Cadm2*, *Cdh10*, *Chl1*, *Megf10*, *Tnc*) have known roles in regulating synapse formation, neurite outgrowth, and axon pathfinding (Batiuk et al., 2020; Chung et al., 2013; Frei et al., 2014; Joester and Faissner, 2001). Interestingly, some cell adhesion genes (*Chl1*, *Ncam1*, *Postn*) expressed in satellite glia are upregulated in Schwann cells in response to neuronal injury (Allard et al., 2018; Zhang et al., 2000).

Satellite glia also expressed specific integrin proteins (*Itga7*, *Itgav*, *Itgb3*), collagen proteins (*Col14a1*, *Col16a1*, *Col28a1*), and other genes involved in extracellular matrix (ECM) binding (**Figure 2D and Table S1**). The enrichment of ECM-related cell adhesion molecules is consistent with a role for satellite glia in maintaining a healthy and organized neuronal microenvironment in peripheral ganglia. Compared to satellite glia, Schwann cells expressed 29 unique cell adhesion molecules, including genes involved in myelination (*Mag*, *Mog*, *Nfasc*, *Mpdz*), cell-cell adhesion (*Cadm3*, *Ctnna3*), and cell-ECM adhesion (*Cd9*, *Cd47*), as well as several specific integrin proteins (*Itga6*, *Itgb1*, *Itgb4*, *Itgb5*) (**Figure 2E, Table S1**).

Finally, we confirmed the specificity of expression of the satellite glia marker, *Fabp7*, and the Schwann cell marker, *Ncmamp*, in sympathetic and sensory ganglia using RNAscope single molecule Fluorescence *in situ* Hybridization (smFISH) (**Figures 2F-K**). Consistent with the sequencing analysis (**Figures 2A-C**), *Fabp7* was enriched in both sympathetic and sensory ganglia (**Figures 2F and 2I**), while *Ncmamp* was abundant in sensory ganglia (**Figure 2G**), but not detected in sympathetic ganglia (**Figure 2J**).

#### *Transcriptional heterogeneity of satellite glia*

Satellite glia could be separated into five transcriptionally distinct populations, when analyzed independent of all other cell types (**Figures 3A-B**). Satellite glia are differentiated into individual clusters specific to sensory or sympathetic ganglia, or three shared clusters which are distinguished by enriched expression of immediate early genes (“IEG”), immune response genes (“Immune response”), or cell adhesion and extracellular matrix-related genes (“General resident”).

#### Sensory satellite glia

Consistent with their association to glutamatergic neurons, one of the strongest marker genes of sensory satellite glia was the excitatory amino acid transporter *Slc1a3* (**Figures 3C and S3A-B**). *Slc1a3* is an established glutamate transporter that acts to uptake excess glutamate from the extracellular space (Kanai and Hediger, 2004). Other enriched glutamatergic machinery in sensory satellite glia included *Slc1a4*, glutamate/neutral amino acid transporter (Kanai and Hediger, 2004), *Phgdh*, an enzyme in serine biosynthesis which influences glutamate receptor activity (Neame et al., 2019), and *Glul*, a glutamine synthetase which catalyzes the conversion of glutamate to glutamine (Rose et al., 2013) (**Figure 3C**). *Glul* mRNA is also found in non-glia cell types in the sensory ganglia, as previously reported (Avraham et al., 2020).

In addition to glutamate-associated genes, we also found striking enrichment of *Gja1*, a gap junction protein that mediates sensory neuron coupling and chronic pain in response to injury (Kim et al., 2016); *Ednrb* endothelin receptor B, which is involved in Schwann cell maturation and myelination (Brennan et al., 2000; Swire et al., 2019); and *Mlc1*, a putative membrane protein of unknown function that has been linked to a neurological disorder, megalencephalic leukoencephalopathy (Schmitt et al., 2003) (**Figure 3C**). Using smFISH, we confirmed that *Mlc1* transcript is more enriched in sensory satellite glia compared to sympathetic glia (**Figures 4A-B**). The most specific and highly expressed marker of sensory satellite glia was the proteoglycan, *Bcan* (Brevican), a structural component of the brain ECM which has been implicated in regulating neurite outgrowth, glioma cell motility, synaptic plasticity, and axon regeneration (Frischknecht and Seidenbecher, 2012) (**Figure 3C**). Of note, astrocyte-derived brevican inhibits outgrowth in cultured cerebellar granule neurons in the brain (Yamada et al., 1997). Since sensory satellite glia inhibit neurite outgrowth in neuron-glia co-cultures (De Koninck et al., 1993) and sensory neurons do not bear dendritic processes, it is tempting to speculate that satellite glia-derived Brevican may play a specific role in suppressing dendrite morphogenesis in sensory ganglia.

Notably, sensory satellite glia were enriched in transcripts associated with cholesterol biosynthesis and turnover including *Hmgcr*, *Fdps*, *Cyp51*, and *Insig1* (Li et al., 2021; Luo et al.,

2020) (**Figure 3C**). The enrichment of cholesterol synthetic machinery in sensory ganglia suggests a greater need for exogenously supplied lipids than in sympathetic ganglia. Altogether, we identified genes in sensory satellite glia that are involved in neuronal maintenance, signal transduction, and neurotransmission.

#### Sympathetic satellite glia

We found few transcripts that are unique to sympathetic satellite glia. Among the few enriched transcripts within sympathetic satellite glia, we detected components of fatty acid biosynthesis, activation, beta-oxidation, and lipoprotein uptake/metabolism, including *Scd2*, *Acsbg1*, *Naaa*, and *Lipg* (McCoy et al., 2002; Miyazaki et al., 2005; Pei et al., 2003) (**Figure 3C**). Using smFISH we confirmed that one of these genes, *Lipg* (endothelial lipase G), was enriched in sympathetic glia (**Figures 4C-D and S3C-D**). Although, sympathetic satellite glia are in direct contact with cholinergic synapses between pre- and post-ganglionic neurons (Hanani, 2010), we were unable to identify transcripts involved in cholinergic neurotransmission, in contrast to the specific glutamatergic neurotransmission-related transcripts detected in sensory ganglia.

#### General resident satellite glia

General resident satellite glia were found in both sensory and sympathetic ganglia and were distinguished by the expression of many genes related to ECM interactions. These genes included collagen proteins (*Col1a1*, *Col1a2*, *Col3a1*, *Col5a1*, *Col18a1*), integrins (*Itga1*, *Itga6*, *Itgb4*), two extracellular annexin proteins (*Anxa1*, *Anxa5*), and the proteoglycan *Hspg2* (**Figure 3C**). In addition to ECM-related transcripts, this cluster also featured the ion channel genes, *Scn7a* and *Kcna1* (**Figure 3C**), which are likely key players in the regulation of extracellular ion concentrations. Interestingly, mutations in two genes, *Kcna1* and *Hspg2*, have been linked to aberrant neuronal excitability and peripheral neuropathies (Bangratz et al., 2012; Browne et al.,

1994), though these effects have been primarily attributed to their expression in neurons or Schwann cells (Bangratz et al., 2012; Browne et al., 1994).

Annexin A1 and A5 (*Anxa1* and *Anxa5*), which were enriched in the General resident glial population (**Figure 3C**), are members of the Annexin family of Ca<sup>2+</sup>- and phospholipid-regulated proteins that mediate membrane trafficking events (Gerke et al., 2005). *Anxa5* binds with high affinity to phosphatidylserine expressed on the surface of apoptotic cells (Koopman et al., 1994). In the DRG, satellite glia precursors, and not the canonical macrophages, are responsible for clearing neuronal corpses during naturally occurring cell death (Wu et al., 2009), raising the possibility that the General resident satellite glial population performs this function in both sensory and sympathetic ganglia. Further, *Anxa1* is upregulated in sensory ganglia in response to inflammation and attenuates nociceptive responses (Chen et al., 2014). Using smFISH, we detected *Anxa1* expression in a subset of satellite glial cells in both sensory and sympathetic ganglia (**Figures 4E-F and S3E-F**), suggesting that this population may have a general role in anti-inflammatory responses.

#### Immediate early gene-expressing satellite glia

A shared population of satellite glia between sensory and sympathetic ganglia expressed many classical immediate early genes, including *Egr1*, *Cyr61*, *Fos*, *Jun*, *Junb*, and *Hspa1a* (**Figure 3C**). The upregulation of immediate early genes is a hallmark of neuronal activity (Guzowski et al., 2005), and in some cases of neuronal injury (Arthur-Farraj et al., 2012). In particular, satellite glia up-regulate c-Fos and c-Jun immediately after sciatic nerve injury (Soares et al., 2001). We observed satellite glia-specific *Egr1* expression in both sensory and sympathetic ganglia using smFISH (**Figures 4G-H, S3G-H**). Detection of *Egr1* in ganglia by smFISH suggests that IEG-expressing satellite glia are present under physiological conditions, and are not a result of dissociation-induced up-regulation in the course of isolating cells for sequencing.

### Immune-responsive satellite glia

A separate shared cluster of satellite glia was demarcated by the specific expression of a cohort of guanylate binding proteins (*Gbp2*, *Gbp3*, *Gbp7*) and related interferon-inducible GTPases (*Igtp*, *ligp1*, *Irgm1*, *Irgm2*, *Gm4951*), which have established roles in intracellular defense against pathogens (Ngo and Man, 2017; Tretina et al., 2019) (**Figure 3C**). The enrichment of these transcripts, in addition to other interferon-inducible genes (*Irf1*, *Ifit1*, *Ifit3*) (**Figure 3C**) that have anti-viral properties (Fensterl and Sen, 2015), suggests that this population defends against viral and bacterial pathogens. Further, these cluster was also enriched for transcription factors *Irf1* and *Stat1* (**Figure 3C**), which are induced by interferon B signaling (Tretina et al., 2019). Strikingly, we found that Immune-responsive satellite glia were disproportionately enriched in sympathetic ganglia (**Figures 4I-J, S3I-J**), in contrast to the other two shared clusters of satellite glia that were more evenly distributed between both ganglia. We used smFISH to validate one of the genes, *Ifit3*, and found that *Ifit3*-positive satellite glia were indeed more abundant in sympathetic ganglia (**Figures 4I-J, S3I-J**). Interestingly, we noticed that *Ifit3*<sup>+</sup> satellite glial cells were concentrated in specific regions within the SCG (**Figure S3J**). These findings suggest that despite the presence of resident macrophages (Pirzgalska et al., 2017), satellite glia are primed to defend the peripheral nervous system against bacterial or viral infections.

## DISCUSSION

In this study, we describe a high-resolution transcriptional comparison of glial cell types between functionally and anatomically distinct ganglia in the peripheral nervous system. Compared to the well-characterized diversity in neuronal populations in peripheral ganglia, little is known about the cellular and molecular diversity of satellite glia that are intimately associated with cell bodies of peripheral neurons. Our analysis reveals five molecularly defined satellite glial cell types (**Figure 4K**), provides a rich resource of gene expression in satellite glia and Schwann cells, and suggests that satellite glia are transcriptionally tuned to their resident ganglia.

Our analyses revealed that satellite glia in sensory and sympathetic ganglia exhibit similarities, but also significant differences in gene expression, which may reflect ganglia-specific functions. Both sensory and sympathetic satellite glial cells express >70 genes involved in fatty acid/cholesterol synthesis and metabolism, including highly expressed transcripts such as *ApoE*, *Fabp7*, and *Fasn*. In general, neurons are inefficient in lipid synthesis, and rely on the uptake of lipids from extrinsic sources (Pfrieger and Ungerer, 2011). Thus, satellite glia may be an important source for the production and release of lipids to their neuronal neighbors. In the mouse brain, astrocyte-derived ApoE regulates neuronal cholesterol biosynthesis and epigenetic mechanisms to promote memory consolidation (Li et al., 2021). *Fabp7* deletion in mice elicits deficits in pre-pulse inhibition, dendrite complexity, and spine density (Bruce et al., 2017; Ebrahimi et al., 2016; Watanabe et al., 2007). Loss of *Fasn* in sensory satellite glia impairs axonal regeneration following injury (Avraham et al., 2020). Together, these results imply critical functions for peripheral satellite glia in regulating neuronal metabolism, epigenetic states, morphology, synaptic function, and nerve repair, through lipid-mediated communication. However, we also observed differences in the lipid pathways that were enriched in sensory *versus* sympathetic satellite glia, suggesting specialized functions within each ganglia. Sensory satellite glia were specifically enriched in genes associated with cholesterol biosynthesis, important for maintenance of neuronal processes, myelination, vesicle formation, and synaptic transmission (Barber and Raben, 2019; Dietschy and Turley, 2004). The majority of cholesterol (~70-80%) in the adult brain is in myelin sheaths that insulate axons (Dietschy and Turley, 2004). Since sensory, but not sympathetic ganglia, contain myelinating Schwann cells which are primarily engaged in membrane synthesis, it is likely that sensory satellite glia provide an additional source for extrinsic cholesterol supply. Consistent with this notion, a substantial fraction of lipids for CNS myelin formation is contributed by astrocytes in addition to the canonical role of oligodendrocytes (Camargo et al., 2017).

Within sensory satellite glia, we also observed specific enrichment of genes involved in glutamate uptake and recycling, consistent with the presence of glutamatergic neurons in sensory, but not sympathetic ganglia. We also observed enriched expression of Connexin 43 (*Gja1*), which is up-regulated following injury in sensory satellite glia and promotes gap junction-mediated coupling between adjacent neurons, a form of neuronal plasticity that contributes to neuropathic pain (Kim et al., 2016). Compared to sensory satellite glia, we found fewer transcripts specific to sympathetic satellite glia, and none that were obviously involved in regulation of cholinergic neurotransmission. Sympathetic satellite glia were largely distinguished by genes involved in fatty acid biosynthesis and metabolism, e.g., *Scd2*, *Acsbg1*, and *Lipg*, which could play a role in supplying building blocks for dendrite and synapse morphogenesis, as well as modulate neurotransmission in sympathetic ganglia.

Our work is consistent with recent transcriptional studies of satellite glial cells (Avraham et al., 2020; Tasdemir-Yilmaz et al., 2020; van Weperen et al., 2021). However, we expand the repertoire of sensory satellite glial cell markers, and reveal new clusters of shared satellite glial cells that are present in functionally disparate peripheral ganglia. Specifically, we define general resident, IEG-expressing, and immune-responsive satellite glia populations and we confirmed the expression of markers by smFISH. One of the shared satellite glial cell types contains signatures of immune responsiveness, including interferon-induced transcripts and genes involved in antiviral defense (Ngo and Man, 2017; Tretina et al., 2019). Although shared, these glia were more abundant in sympathetic ganglia and may have a specific role in protecting peripheral neurons against viral or bacterial pathogens. Notably, while we focused on the SCG, it remains unclear whether the 5 identified sympathetic satellite glial sub-types exist across the entire sympathetic chain, or if each ganglion has its own unique set of glial populations. A recent analysis of the stellate ganglion identified 5 satellite glial populations, including a subtype enriched for *Kcna1* and *Scn7a* (van Weperen et al., 2021), which corresponds well with the General resident satellite glia in our data, as well as a subtype enriched for genes involved in “interferon signaling”,



which is similar to the immune-response satellite glia revealed by our analysis. Additionally, the authors noted a population of satellite glia which expressed high levels of immediate early genes, though it was excluded from their analysis. Thus, the 3 shared populations of satellite glia that we identified may be present throughout the sympathetic chain ganglia.

In summary, we provide a resource for satellite glia in functionally distinct peripheral ganglia, which provides a framework for future investigations of ganglion-specific satellite glia populations during development, injury, and disease. The identification of new markers for satellite glia in sensory and sympathetic ganglia can be used to genetically target these cells for imaging, ablation, and optogenetic studies. Recent studies suggest that satellite glia could serve as important targets for interventions in chronic pain (Hanani and Spray, 2020; Kim et al., 2016; Xie et al., 2017) or heart disease, and the knowledge gained from this study can be used to generate relevant animal models to study human disease.

## **STAR METHODS**

- KEY RESOURCES TABLE
- CONTACT FOR REAGENT AND RESOURCE SHARING
- EXPERIMENTAL MODEL AND SUBJECT DETAILS
  - Animals
- METHOD DETAILS
  - Drop-Seq mixed species validation
  - SCG/DRG tissue isolation and preparation of single cell suspensions
  - Drop-Seq single cell partitioning, library preparation, and sequencing
  - Drop-Seq data preprocessing
  - PCA, clustering, and differential gene expression analysis

- Gene Ontology analysis
- Data and code availability
- smFISH protocol

## **QUANTIFICATION AND STATISTICAL ANALYSES**

Information for statistical analyses for all experiments are provided in figure and table legends.

**Acknowledgements:** We thank all members of the Kuruvilla, Zhao, and Hattar labs for helpful comments on the project, and the NIMH Microarray Core Facility for providing library quality control and sequencing. This work was supported by NIH R01 awards, NS073751 and NS107342, to R.K., DC016065 and EY027202 to H.Z, and NIMH intramural research funds (ZIAMH002964) to S.H., a NSF GRFP award to A.M., and NIH Training grant T32GM007231 to the JHU CMDB graduate program for A.M, M.T, and E.B.

**Author Contributions:** A.M and M.T contributed to study design, investigations, data analyses, and writing and editing the manuscript. E.B. assisted with experiments. R.K, H.Z, and S.H contributed to writing/editing the manuscript and funding acquisition.

## REFERENCES:

- Albig, A.R., and Schiemann, W.P. (2004). Fibulin-5 antagonizes vascular endothelial growth factor (VEGF) signaling and angiogenic sprouting by endothelial cells. *DNA Cell Biol* 23, 367-379.
- Allard, D.E., Wang, Y., Li, J.J., Conley, B., Xu, E.W., Sailer, D., Kimpston, C., Notini, R., Smith, C.J., Koseoglu, E., *et al.* (2018). Schwann cell-derived periostin promotes autoimmune peripheral polyneuropathy via macrophage recruitment. *The Journal of clinical investigation* 128, 4727-4741.
- Arthur-Farraj, P.J., Latouche, M., Wilton, D.K., Quintes, S., Chabrol, E., Banerjee, A., Woodhoo, A., Jenkins, B., Rahman, M., Turmaine, M., *et al.* (2012). c-Jun reprograms Schwann cells of injured nerves to generate a repair cell essential for regeneration. *Neuron* 75, 633-647.
- Avraham, O., Deng, P.Y., Jones, S., Kuruvilla, R., Semenkovich, C.F., Klyachko, V.A., and Cavalli, V. (2020). Satellite glial cells promote regenerative growth in sensory neurons. *Nature communications* 11, 4891.
- Bangratz, M., Sarrazin, N., Devaux, J., Zambroni, D., Echaniz-Laguna, A., Rene, F., Boerio, D., Davoine, C.S., Fontaine, B., Feltri, M.L., *et al.* (2012). A mouse model of Schwartz-Jampel syndrome reveals myelinating Schwann cell dysfunction with persistent axonal depolarization in vitro and distal peripheral nerve hyperexcitability when perlecan is lacking. *Am J Pathol* 180, 2040-2055.
- Barber, C.N., and Raben, D.M. (2019). Lipid Metabolism Crosstalk in the Brain: Glia and Neurons. *Frontiers in cellular neuroscience* 13, 212.
- Batiuk, M.Y., Martirosyan, A., Wahis, J., de Vin, F., Marneffe, C., Kusserow, C., Koeppen, J., Viana, J.F., Oliveira, J.F., Voet, T., *et al.* (2020). Identification of region-specific astrocyte subtypes at single cell resolution. *Nature communications* 11, 1220.
- Bouyakdan, K., Martin, H., Lienard, F., Budry, L., Taib, B., Rodaros, D., Chretien, C., Biron, E., Husson, Z., Cota, D., *et al.* (2019). The gliotransmitter ACBP controls feeding and energy homeostasis via the melanocortin system. *The Journal of clinical investigation* 129, 2417-2430.
- Brennan, A., Dean, C.H., Zhang, A.L., Cass, D.T., Mirsky, R., and Jessen, K.R. (2000). Endothelins control the timing of Schwann cell generation in vitro and in vivo. *Developmental biology* 227, 545-557.
- Britsch, S., Goerich, D.E., Riethmacher, D., Peirano, R.I., Rossner, M., Nave, K.A., Birchmeier, C., and Wegner, M. (2001). The transcription factor Sox10 is a key regulator of peripheral glial development. *Genes & development* 15, 66-78.
- Browne, D.L., Gancher, S.T., Nutt, J.G., Brunt, E.R., Smith, E.A., Kramer, P., and Litt, M. (1994). Episodic ataxia/myokymia syndrome is associated with point mutations in the human potassium channel gene, KCNA1. *Nature genetics* 8, 136-140.
- Bruce, K.D., Zsombok, A., and Eckel, R.H. (2017). Lipid Processing in the Brain: A Key Regulator of Systemic Metabolism. *Frontiers in endocrinology* 8, 60.
- Camargo, N., Goudriaan, A., van Deijk, A.F., Otte, W.M., Brouwers, J.F., Lodder, H., Gutmann, D.H., Nave, K.A., Dijkhuizen, R.M., Mansvelter, H.D., *et al.* (2017). Oligodendroglial myelination requires astrocyte-derived lipids. *PLoS biology* 15, e1002605.
- Chen, L., Lv, F., and Pei, L. (2014). Annexin 1: a glucocorticoid-inducible protein that modulates inflammatory pain. *Eur J Pain* 18, 338-347.
- Chung, W.S., Clarke, L.E., Wang, G.X., Stafford, B.K., Sher, A., Chakraborty, C., Joung, J., Foo, L.C., Thompson, A., Chen, C., *et al.* (2013). Astrocytes mediate synapse elimination through MEGF10 and MERTK pathways. *Nature* 504, 394-400.
- De Koninck, P., Carbonetto, S., and Cooper, E. (1993). NGF induces neonatal rat sensory neurons to extend dendrites in culture after removal of satellite cells. *The Journal of neuroscience : the official journal of the Society for Neuroscience* 13, 577-585.

- Dietschy, J.M., and Turley, S.D. (2004). Thematic review series: brain Lipids. Cholesterol metabolism in the central nervous system during early development and in the mature animal. *Journal of lipid research* *45*, 1375-1397.
- Ebrahimi, M., Yamamoto, Y., Sharifi, K., Kida, H., Kagawa, Y., Yasumoto, Y., Islam, A., Miyazaki, H., Shimamoto, C., Maekawa, M., *et al.* (2016). Astrocyte-expressed FABP7 regulates dendritic morphology and excitatory synaptic function of cortical neurons. *Glia* *64*, 48-62.
- Enes, J., Haburcak, M., Sona, S., Gerard, N., Mitchell, A.C., Fu, W., and Birren, S.J. (2020). Satellite glial cells modulate cholinergic transmission between sympathetic neurons. *PLoS one* *15*, e0218643.
- Ernsberger, U., Deller, T., and Rohrer, H. (2020). The diversity of neuronal phenotypes in rodent and human autonomic ganglia. *Cell and tissue research* *382*, 201-231.
- Fensterl, V., and Sen, G.C. (2015). Interferon-induced Ifit proteins: their role in viral pathogenesis. *Journal of virology* *89*, 2462-2468.
- Frei, J.A., Andermatt, I., Gesemann, M., and Stoeckli, E.T. (2014). The SynCAM synaptic cell adhesion molecules are involved in sensory axon pathfinding by regulating axon-axon contacts. *Journal of cell science* *127*, 5288-5302.
- Frischknecht, R., and Seidenbecher, C.I. (2012). Brevican: a key proteoglycan in the perisynaptic extracellular matrix of the brain. *The international journal of biochemistry & cell biology* *44*, 1051-1054.
- Furlan, A., La Manno, G., Lubke, M., Haring, M., Abdo, H., Hochgerner, H., Kupari, J., Usoskin, D., Airaksinen, M.S., Oliver, G., *et al.* (2016). Visceral motor neuron diversity delineates a cellular basis for nipple- and pilo-erection muscle control. *Nature neuroscience* *19*, 1331-1340.
- Gerke, V., Creutz, C.E., and Moss, S.E. (2005). Annexins: linking Ca<sup>2+</sup> signalling to membrane dynamics. *Nature reviews Molecular cell biology* *6*, 449-461.
- Giussani, P., Prinetti, A., and Tringali, C. (2021). The role of Sphingolipids in myelination and myelin stability and their involvement in childhood and adult demyelinating disorders. *Journal of neurochemistry* *156*, 403-414.
- Goldstein, D.S. (2013). Differential responses of components of the autonomic nervous system. *Handbook of clinical neurology* *117*, 13-22.
- Guzowski, J.F., Timlin, J.A., Roysam, B., McNaughton, B.L., Worley, P.F., and Barnes, C.A. (2005). Mapping behaviorally relevant neural circuits with immediate-early gene expression. *Current opinion in neurobiology* *15*, 599-606.
- Hanani, M. (2010). Satellite glial cells in sympathetic and parasympathetic ganglia: in search of function. *Brain Res Rev* *64*, 304-327.
- Hanani, M., and Spray, D.C. (2020). Emerging importance of satellite glia in nervous system function and dysfunction. *Nature reviews Neuroscience* *21*, 485-498.
- Hillenbrand, R., Molthagen, M., Montag, D., and Schachner, M. (1999). The close homologue of the neural adhesion molecule L1 (CHL1): patterns of expression and promotion of neurite outgrowth by heterophilic interactions. *The European journal of neuroscience* *11*, 813-826.
- Holtzman, D.M., Herz, J., and Bu, G. (2012). Apolipoprotein E and apolipoprotein E receptors: normal biology and roles in Alzheimer disease. *Cold Spring Harb Perspect Med* *2*, a006312.
- Huang da, W., Sherman, B.T., and Lempicki, R.A. (2009). Systematic and integrative analysis of large gene lists using DAVID bioinformatics resources. *Nature protocols* *4*, 44-57.
- Ioannou, M.S., Jackson, J., Sheu, S.H., Chang, C.L., Weigel, A.V., Liu, H., Pasolli, H.A., Xu, C.S., Pang, S., Matthies, D., *et al.* (2019). Neuron-Astrocyte Metabolic Coupling Protects against Activity-Induced Fatty Acid Toxicity. *Cell* *177*, 1522-1535 e1514.
- Jessen, K.R., and Mirsky, R. (2005). The origin and development of glial cells in peripheral nerves. *Nature reviews Neuroscience* *6*, 671-682.
- Joester, A., and Faissner, A. (2001). The structure and function of tenascins in the nervous system. *Matrix biology : journal of the International Society for Matrix Biology* *20*, 13-22.

- Kanai, Y., and Hediger, M.A. (2004). The glutamate/neutral amino acid transporter family SLC1: molecular, physiological and pharmacological aspects. *Pflugers Archiv : European journal of physiology* *447*, 469-479.
- Kiernan, J.A. (1996). Vascular permeability in the peripheral autonomic and somatic nervous systems: controversial aspects and comparisons with the blood-brain barrier. *Microsc Res Tech* *35*, 122-136.
- Kim, Y.S., Anderson, M., Park, K., Zheng, Q., Agarwal, A., Gong, C., Saijilafu, Young, L., He, S., LaVinka, P.C., *et al.* (2016). Coupled Activation of Primary Sensory Neurons Contributes to Chronic Pain. *Neuron* *91*, 1085-1096.
- Kokovay, E., Wang, Y., Kusek, G., Wurster, R., Lederman, P., Lowry, N., Shen, Q., and Temple, S. (2012). VCAM1 is essential to maintain the structure of the SVZ niche and acts as an environmental sensor to regulate SVZ lineage progression. *Cell stem cell* *11*, 220-230.
- Koopman, G., Reutelingsperger, C.P., Kuijten, G.A., Keehnen, R.M., Pals, S.T., and van Oers, M.H. (1994). Annexin V for flow cytometric detection of phosphatidylserine expression on B cells undergoing apoptosis. *Blood* *84*, 1415-1420.
- Kurtz, A., Zimmer, A., Schnutgen, F., Bruning, G., Spener, F., and Muller, T. (1994). The expression pattern of a novel gene encoding brain-fatty acid binding protein correlates with neuronal and glial cell development. *Development* *120*, 2637-2649.
- Li, X., Zhang, J., Li, D., He, C., He, K., Xue, T., Wan, L., Zhang, C., and Liu, Q. (2021). Astrocytic ApoE reprograms neuronal cholesterol metabolism and histone-acetylation-mediated memory. *Neuron* *109*, 957-970 e958.
- Liu, Y., and Ma, Q. (2011). Generation of somatic sensory neuron diversity and implications on sensory coding. *Current opinion in neurobiology* *21*, 52-60.
- Luo, J., Yang, H., and Song, B.L. (2020). Mechanisms and regulation of cholesterol homeostasis. *Nature reviews Molecular cell biology* *21*, 225-245.
- Macosko, E.Z., Basu, A., Satija, R., Nemesh, J., Shekhar, K., Goldman, M., Tirosh, I., Bialas, A.R., Kamitaki, N., Martersteck, E.M., *et al.* (2015). Highly Parallel Genome-wide Expression Profiling of Individual Cells Using Nanoliter Droplets. *Cell* *161*, 1202-1214.
- Marmigere, F., and Ernfors, P. (2007). Specification and connectivity of neuronal subtypes in the sensory lineage. *Nature reviews Neuroscience* *8*, 114-127.
- McCoy, M.G., Sun, G.S., Marchadier, D., Maugeais, C., Glick, J.M., and Rader, D.J. (2002). Characterization of the lipolytic activity of endothelial lipase. *Journal of lipid research* *43*, 921-929.
- Miyazaki, M., Dobrzyn, A., Elias, P.M., and Ntambi, J.M. (2005). Stearoyl-CoA desaturase-2 gene expression is required for lipid synthesis during early skin and liver development. *Proceedings of the National Academy of Sciences of the United States of America* *102*, 12501-12506.
- Monk, K.R., Feltri, M.L., and Taveggia, C. (2015). New insights on Schwann cell development. *Glia* *63*, 1376-1393.
- Neame, S., Safory, H., Radzishevsky, I., Touitou, A., Marchesani, F., Marchetti, M., Kellner, S., Berlin, S., Foltyn, V.N., Engelender, S., *et al.* (2019). The NMDA receptor activation by d-serine and glycine is controlled by an astrocytic Phgdh-dependent serine shuttle. *Proceedings of the National Academy of Sciences of the United States of America* *116*, 20736-20742.
- Ngo, C.C., and Man, S.M. (2017). Mechanisms and functions of guanylate-binding proteins and related interferon-inducible GTPases: Roles in intracellular lysis of pathogens. *Cellular microbiology* *19*.
- Pannese, E. (1981). The satellite cells of the sensory ganglia. *Adv Anat Embryol Cell Biol* *65*, 1-111.
- Pei, Z., Oey, N.A., Zuidervaart, M.M., Jia, Z., Li, Y., Steinberg, S.J., Smith, K.D., and Watkins, P.A. (2003). The acyl-CoA synthetase "bubblegum" (lipidosin): further characterization and role in neuronal fatty acid beta-oxidation. *The Journal of biological chemistry* *278*, 47070-47078.



- Pfriege, F.W., and Ungerer, N. (2011). Cholesterol metabolism in neurons and astrocytes. *Prog Lipid Res* 50, 357-371.
- Pirzgalska, R.M., Seixas, E., Seidman, J.S., Link, V.M., Sanchez, N.M., Mahu, I., Mendes, R., Gres, V., Kubasova, N., Morris, I., *et al.* (2017). Sympathetic neuron-associated macrophages contribute to obesity by importing and metabolizing norepinephrine. *Nature medicine* 23, 1309-1318.
- Rose, C.F., Verkhatsky, A., and Parpura, V. (2013). Astrocyte glutamine synthetase: pivotal in health and disease. *Biochemical Society transactions* 41, 1518-1524.
- Ryu, E.J., Yang, M., Gustin, J.A., Chang, L.W., Freimuth, R.R., Nagarajan, R., and Milbrandt, J. (2008). Analysis of peripheral nerve expression profiles identifies a novel myelin glycoprotein, MP11. *The Journal of neuroscience : the official journal of the Society for Neuroscience* 28, 7563-7573.
- Satija, R., Farrell, J.A., Gennert, D., Schier, A.F., and Regev, A. (2015). Spatial reconstruction of single-cell gene expression data. *Nature biotechnology* 33, 495-502.
- Saunders, A., Macosko, E.Z., Wysoker, A., Goldman, M., Krienen, F.M., de Rivera, H., Bien, E., Baum, M., Bortolin, L., Wang, S., *et al.* (2018). Molecular Diversity and Specializations among the Cells of the Adult Mouse Brain. *Cell* 174, 1015-1030 e1016.
- Schmitt, A., Gofferje, V., Weber, M., Meyer, J., Mossner, R., and Lesch, K.P. (2003). The brain-specific protein MLC1 implicated in megalencephalic leukoencephalopathy with subcortical cysts is expressed in glial cells in the murine brain. *Glia* 44, 283-295.
- Shi, H., Cui, H., Alam, G., Gunning, W.T., Nestor, A., Giovannucci, D., Zhang, M., and Ding, H.F. (2008). Nestin expression defines both glial and neuronal progenitors in postnatal sympathetic ganglia. *The Journal of comparative neurology* 508, 867-878.
- Soares, H.D., Chen, S.C., and Morgan, J.I. (2001). Differential and prolonged expression of Fos-lacZ and Jun-lacZ in neurons, glia, and muscle following sciatic nerve damage. *Experimental neurology* 167, 1-14.
- Stuart, T., Butler, A., Hoffman, P., Hafemeister, C., Papalexi, E., Mauck, W.M., 3rd, Hao, Y., Stoeckius, M., Smibert, P., and Satija, R. (2019). Comprehensive Integration of Single-Cell Data. *Cell* 177, 1888-1902 e1821.
- Sukhanov, N., Vainshtein, A., Eshed-Eisenbach, Y., and Peles, E. (2021). Differential Contribution of Cadm1-Cadm3 Cell Adhesion Molecules to Peripheral Myelinated Axons. *The Journal of neuroscience : the official journal of the Society for Neuroscience* 41, 1393-1400.
- Swire, M., Kotelevtsev, Y., Webb, D.J., Lyons, D.A., and Ffrench-Constant, C. (2019). Endothelin signalling mediates experience-dependent myelination in the CNS. *eLife* 8.
- Tasdemir-Yilmaz, O., Druckenbrod, N., Olukoya, O., Yung, A., Bastille, I., Pazyra-Murphy, M., Sitko, A., Hale, E., Vigneau, S., Gimelbrant, A., *et al.* (2020). Diversity of developing peripheral glia revealed by single cell RNA sequencing. *bioRxiv*, 2020.2012.2004.411975.
- Tretina, K., Park, E.S., Maminska, A., and MacMicking, J.D. (2019). Interferon-induced guanylate-binding proteins: Guardians of host defense in health and disease. *J Exp Med* 216, 482-500.
- Usoskin, D., Furlan, A., Islam, S., Abdo, H., Lonnerberg, P., Lou, D., Hjerling-Leffler, J., Haeggstrom, J., Kharchenko, O., Kharchenko, P.V., *et al.* (2015). Unbiased classification of sensory neuron types by large-scale single-cell RNA sequencing. *Nature neuroscience* 18, 145-153.
- van Weperen, V.Y.H., Littman, R.J., Arneson, D.V., Contreras, J., Yang, X., and Ajjola, O.A. (2021). Single-cell transcriptomic profiling of satellite glial cells in stellate ganglia reveals developmental and functional axial dynamics. *Glia* 69, 1281-1291.
- Vanlandewijck, M., He, L., Mae, M.A., Andrae, J., Ando, K., Del Gaudio, F., Nahar, K., Lebouvier, T., Lavina, B., Gouveia, L., *et al.* (2018). A molecular atlas of cell types and zonation in the brain vasculature. *Nature* 554, 475-480.

- Watanabe, A., Toyota, T., Owada, Y., Hayashi, T., Iwayama, Y., Matsumata, M., Ishitsuka, Y., Nakaya, A., Maekawa, M., Ohnishi, T., *et al.* (2007). Fabp7 maps to a quantitative trait locus for a schizophrenia endophenotype. *PLoS biology* 5, e297.
- Wu, H.H., Bellmunt, E., Scheib, J.L., Venegas, V., Burkert, C., Reichardt, L.F., Zhou, Z., Farinas, I., and Carter, B.D. (2009). Glial precursors clear sensory neuron corpses during development via Jedi-1, an engulfment receptor. *Nature neuroscience* 12, 1534-1541.
- Xie, A.X., Lee, J.J., and McCarthy, K.D. (2017). Ganglionic GFAP (+) glial Gq-PCR signaling enhances heart functions in vivo. *JCI Insight* 2, e90565.
- Yamada, H., Fredette, B., Shitara, K., Hagihara, K., Miura, R., Ranscht, B., Stallcup, W.B., and Yamaguchi, Y. (1997). The brain chondroitin sulfate proteoglycan brevican associates with astrocytes ensheathing cerebellar glomeruli and inhibits neurite outgrowth from granule neurons. *The Journal of neuroscience : the official journal of the Society for Neuroscience* 17, 7784-7795.
- Zeisel, A., Hochgerner, H., Lonnerberg, P., Johnsson, A., Memic, F., van der Zwan, J., Haring, M., Braun, E., Borm, L.E., La Manno, G., *et al.* (2018). Molecular Architecture of the Mouse Nervous System. *Cell* 174, 999-1014 e1022.
- Zhang, Y., Roslan, R., Lang, D., Schachner, M., Lieberman, A.R., and Anderson, P.N. (2000). Expression of CHL1 and L1 by neurons and glia following sciatic nerve and dorsal root injury. *Molecular and cellular neurosciences* 16, 71-86.

## FIGURE LEGENDS:

### Figure 1. Cell type diversity in sensory and sympathetic ganglia

(A) UMAP of 21,524 single cells with major cell types highlighted

(B) UMAP as in (A) overlaid with ganglia of origin

(C) Dot plot showing differentially enriched genes for diverse cell types in peripheral ganglia. Dot size is proportional to the percentage of each cluster expressing the marker gene, and the color intensity is correlated with expression level.

(D and E) UMAP plots of sympathetic and sensory neurons following isolation and re-clustering. Clusters are highlighted with literature-defined names based on published gene expression patterns (Furlan et al., 2016, Zeisel et al., 2018)

(F) Non-neuronal and non-glial cell type clusters

(G) Same as in (F) overlaid with ganglia of origin

### Figure 2. Comparison of Schwann cell and satellite glial cell transcriptional identity

(A) UMAP of glial cell populations in sensory and sympathetic tissue.

(B) Same as in (A) overlaid with ganglia of origin

(C) Volcano plot of all differentially expressed genes between Schwann cells and satellite glia (red dots:  $p < 10^{-50}$ )

(D-E) Gene ontology and KEGG pathway analysis of satellite glia- and Schwann cell-enriched transcripts. Top 3 biological process terms, molecular function terms, and KEGG pathways are shown. Labels denote the number of genes identified in each category.

(F-H) smFISH of *Fabp7* and *Ncmamp* mRNA in sensory ganglia

(I-K) smFISH of *Fabp7* and *Ncmamp* mRNA in sympathetic ganglia

Scale bars are 100  $\mu\text{m}$  and 15  $\mu\text{m}$  (insets)

### Figure 3. Transcriptional heterogeneity of satellite glial cells



(A) UMAP of satellite glial cell populations in sensory and sympathetic ganglia

(B) Same as in (A) overlaid with ganglia of origin

(C) Dot plots of satellite glial cell cluster marker genes and enriched transcripts. Dot size is proportional to the percentage of each cluster expressing the marker gene, and the color intensity is correlated with expression level.

#### Figure 4. Histological validation of satellite glial cell type markers

(A-B) UMAP expression plot of *Mlc1* mRNA in sensory (A) and sympathetic ganglia (B)

(A'-B'') smFISH of *Mlc1* (magenta) and *Kcnj10* (green) mRNA in sensory (A'-A'') and sympathetic (B'-B'') ganglia.

(C-D) UMAP expression plot of *Lipg* mRNA in sensory (C) and sympathetic ganglia (D)

(C'-D'') smFISH of *Lipg* (magenta) and *Fabp7* (green) mRNA in sensory (C'-C'') and sympathetic (D'-D'') ganglia.

(E-F) UMAP expression plot of *Anxa1* mRNA in sensory (E) and sympathetic ganglia (F)

(E'-F'') smFISH of *Anxa1* (magenta) and *Fabp7* (green) mRNA in sensory (E'-E'') and sympathetic (F'-F'') ganglia.

(G-H) UMAP expression plot of *Egr1* mRNA in sensory (G) and sympathetic ganglia (H)

(G'-H'') smFISH of *Egr1* (magenta) and *Kcnj10* (green) mRNA in sensory (G'-G'') and sympathetic (H'-H'') ganglia.

(I-J) UMAP expression plot of *Ifit3* mRNA in sensory (I) and sympathetic ganglia (J).

(I'-J'') smFISH of *Ifit3* (magenta) and *Kcnj10* (green) mRNA in sensory (I'-I'') and sympathetic (J'-J'') ganglia.

Yellow arrows indicate satellite glia positive for the gene of interest, while cyan arrows indicate satellite glia negative for the gene of interest

Scale bars are 15  $\mu$ m.

(K) Transcriptional classification of sympathetic and sensory satellite glia subtypes.

## **Supplemental Figure S1. Drop-Seq workflow, validation, and marker genes, Related to Figure 1**

- (A) Workflow of Drop-seq single cell RNA sequencing
- (B) Barnyard plot of mixed-species Drop-seq. NIH-3T3 (mouse) and HEK293 (human) cells sequenced in equal mixture results in 5/400 (1.25%) detectable cell-cell doublets.
- (C) Dot plot of marker genes identified in non-neuronal and non-glia cells
- (D) UMAP plot of proliferating cells within sensory and sympathetic ganglia (mTC1/2: T-cells, mErythro: erythrocytes, mEndo: endothelial cells, mSat: satellite glia)

## **Supplemental Figure S2. Heterogeneity of peripheral neurons, Related to Figure 2**

- (A) UMAP expression plots of subtypes of adrenergic sympathetic neurons
- (B) UMAP expression plots of subtypes of peptidergic, non-peptidergic, and neurofilament-expressing sensory neurons

## **Supplemental Figure S3. Satellite glia heterogeneity between sympathetic and sensory ganglia, Related to Figure 3**

- (A-B) smFISH of *Slc1a3* mRNA in sensory (A) and sympathetic ganglia (B).
- (C-D) smFISH of *Lipg* mRNA in sensory (C) and sympathetic ganglia (D).
- (E-F) smFISH of *Anxa1* mRNA in sensory (E) and sympathetic ganglia (F).
- (G-H) smFISH of *Egr1* mRNA in sensory (G) and sympathetic ganglia (H).
- (I-J) smFISH of *Ifit3* mRNA in sensory (I) and sympathetic ganglia (J).

Scale bars are 100  $\mu$ m.

## STAR METHODS

### KEY RESOURCES TABLE

| REAGENT or RESOURCE                                    | SOURCE                              | IDENTIFIER                                                                                                            |
|--------------------------------------------------------|-------------------------------------|-----------------------------------------------------------------------------------------------------------------------|
| RNAscope® Fluorescent Multiplex Assay                  | ACD                                 | Cat# 320850                                                                                                           |
| RNAscope® Probe-Fabp7                                  | ACD                                 | Cat# 414651                                                                                                           |
| RNAscope® Probe-Ncmmap-C2                              | ACD                                 | Cat# 577231-C2                                                                                                        |
| RNAscope® Probe-Kcnj10-C2                              | ACD                                 | Cat# 458831-C2                                                                                                        |
| RNAscope® Probe-Kcnj10-C3                              | ACD                                 | Cat# 458831-C3                                                                                                        |
| RNAscope® Probe-Mlc1                                   | ACD                                 | Cat# 516358                                                                                                           |
| RNAscope® Probe-Lipg-C3                                | ACD                                 | Cat# 492521-C3                                                                                                        |
| RNAscope® Probe-Egr1                                   | ACD                                 | Cat# 423371                                                                                                           |
| RNAscope® Probe-lfit3                                  | ACD                                 | Cat# 420228                                                                                                           |
| RNAscope® Probe-Anxa1-C2                               | ACD                                 | Cat# 509299-C2                                                                                                        |
| RNAscope® Probe-Slc1a3-C3                              | ACD                                 | Cat# 430788-C3                                                                                                        |
| RNAscope® Probe-lfit1                                  | ACD                                 | Cat# 508259                                                                                                           |
| RNAscope® Probe-Cyr61-C2                               | ACD                                 | Cat# 429009-C2                                                                                                        |
| <b>Single cell dissociation reagents</b>               |                                     |                                                                                                                       |
| Papain Dissociation System                             | Worthington Biochemical Corporation | Cat# LK003176                                                                                                         |
| Dulbecco's Modified Eagle Medium/Nutrient Mixture F-12 | ThermoFisher Scientific             | Cat# 11330057                                                                                                         |
| Hanks' Balanced Salt Solution                          | ThermoFisher Scientific             | Cat# 14175103                                                                                                         |
| Hepes                                                  | Sigma-Aldrich                       | Cat# H3375-100G                                                                                                       |
| Collagenase                                            | Sigma-Aldrich                       | Cat# 11249002001                                                                                                      |
| Glucose                                                | Sigma-Aldrich                       | Cat# G8270-100G                                                                                                       |
| Penicillin/streptomycin                                | ThermoFisher Scientific             | Cat# 15140122                                                                                                         |
| <b>Experimental Models: Organisms/Strains</b>          |                                     |                                                                                                                       |
| C57Bl6 mice                                            | Jackson Labs                        | Strain# 000664                                                                                                        |
| <b>Software and Algorithms</b>                         |                                     |                                                                                                                       |
| ImageJ                                                 | N/A                                 | <a href="https://imagej.nih.gov/ij/">https://imagej.nih.gov/ij/</a>                                                   |
| ZEN2 (blue edition)                                    | N/A                                 | <a href="https://www.zeiss.com/microscopy/int/home.html">https://www.zeiss.com/microscopy/int/home.html</a>           |
| STAR (v2.4.2a)                                         | Dobin et al., 2013                  | <a href="https://github.com/alxndobin/STAR">https://github.com/alxndobin/STAR</a>                                     |
| Drop-seq_tools-2.0.0                                   | Macosko et al., 2015                | <a href="https://github.com/broadinstitute/Drop-seq/releases">https://github.com/broadinstitute/Drop-seq/releases</a> |
| Seurat V3                                              | Stuart et al., 2019                 | <a href="https://satijalab.org/seurat/">https://satijalab.org/seurat/</a>                                             |
| R                                                      | R Core Team                         | <a href="http://www.r-project.org/">http://www.r-project.org/</a>                                                     |

| <b>Drop-Seq Reagents</b>                                                                                   |                              |                     |
|------------------------------------------------------------------------------------------------------------|------------------------------|---------------------|
| Nextera XT DNA Library Preparation Kit                                                                     | Illumina                     | FC-131-1024         |
| Agencourt AmpureXP Beads                                                                                   | Backman Coulter              | A63880              |
| Drop-seq beads - Barcoded Seq B                                                                            | Chemgenes                    | Macosko-2011-10(V+) |
| PDMS co-flow microfluidic droplet generation device                                                        | FlowJEM                      | N/A                 |
| Drop-Seq reagents                                                                                          | Macosko et al., 2015         | N/A                 |
| <b>Deposited Data</b>                                                                                      |                              |                     |
| Raw and processed data files for Drop-Seq                                                                  | NCBI Gene Expression Omnibus | GSE175421           |
| <b>Primers</b>                                                                                             |                              |                     |
| Template Switch Oligo (TSO) – 5'-AAGCAGTGGTATCAACGCAGAGTGAATrGrGrG-3'                                      | Macosko et al., 2015         | N/A                 |
| SMART PCR primer – 5'-AAGCAGTGGTATCAACGCAGAGT-3'                                                           | Macosko et al., 2015         |                     |
| New-P5-SMART PCR hybrid oligo – 5'-AATGATACGGCGACCACCGAGATCTACACGCCTGTCCGCGGAAGCAGTGGTATCAACGCAGAGT*A*C-3' | Macosko et al., 2015         |                     |
| Custom Read 1 primer – 5'-GCCTGTCCGCGGAAGCAGTGGTATCAACGCAGAGTAC-3'                                         | Macosko et al., 2015         |                     |

## CONTACT FOR REAGENT AND RESOURCE SHARING

Further information and requests for resources and reagents should be directed to and will be fulfilled by the Lead Contact, Rejji Kuruvilla.

## EXPERIMENTAL MODEL AND SUBJECT DETAILS

### MATERIALS & METHODS

#### Animal care and housing

Adult *C57Bl/6* mice (stock no. 000664; Jackson Labs), aged between postnatal days P30-P45, were used for all experiments. Male and female mice were included in all experiments. Mice were housed under standard conditions with access to food and water *ad libitum*. All experimental procedures were performed in accordance with guidelines of the Animal Care and Use Committee of Johns Hopkins University.

#### Drop-Seq mixed species validation

HEK293 (human) and NIH-3T3 (mouse) cells were grown separately in culture until nearly confluent, then dissociated with Trypsin and resuspended to a concentration of approximately 50,000 cells/ml. An equal amount of mouse and human cells were combined in a single tube which was used as input to the Drop-Seq setup using the parameters described in the 'Drop-Seq single cell partitioning, library preparation' section below. For mixed species experiments, completed sequencing libraries were run on a MiSeq and reads were demultiplexed and aligned using the Drop-Seq Tools 1.0 pipeline. Barnyard plots for mixed species experiments were generated in R.

### **SCG/DRG tissue isolation and preparation of single cell suspensions**

Dissections and single cell collections were performed between 9 a.m-2 p.m. Multiple sympathetic or sensory ganglia were pooled together for each round of Drop-Seq. Ganglia were incubated in 50 units Papain diluted in HBSS plus HEPES for 20 min at 37°C then washed with HBSS plus HEPES and incubated for an additional 20 min at 37°C with 1.5mg/mL collagenase in HBSS plus HEPES. Following the second incubation, ganglia were washed again and then suspended and triturated in DMEM AIR (DMEM F12 supplemented with 12.5mM glucose and 1U/ml penicillin/streptomycin). Cells were centrifuged and resuspended in fresh DMEM AIR.

### **Drop-Seq single cell partitioning, library preparation, and sequencing**

Single cell suspensions were diluted to a concentration of 100 cells/ $\mu$ l and processed with the Drop-Seq protocol as previously described (Macosko et al., 2015). Flow rates for cells, beads, and oil were optimized for aquapel-treated PDMS devices purchased from FlowJem (cells and beads: 2,300  $\mu$ l/hour, oil: 13,000  $\mu$ l/hour). Up to two samples were processed in series, with single cell suspensions and stable emulsions held on ice until all collections were completed (no more

than 1 hour) before proceeding immediately with reverse transcription. cDNA amplification was performed using 4000 beads/reaction with a total of 15 cycles of PCR. Sequencing libraries were generated from amplified cDNA with the Illumina Nextera XT Library Prep kit and up to 6 libraries were multiplexed for sequencing on an Illumina NextSeq500 platform. Sequencing was performed by the NIMH Microarray Core Facility (Bethesda, MD).

### **Drop-Seq data preprocessing**

Reads were demultiplexed and aligned to the mouse genome (mm10), and digital gene expression matrices were generated using the Drop-Seq Tools 2.0.0 pipeline (<https://github.com/broadinstitute/Drop-seq/releases>).

### **PCA, clustering, and differential gene expression analysis**

Digital gene expression matrices for all samples were imported and processed with the Seurat package (Satija et al., 2015; Stuart et al., 2019). Cells containing fewer than 200 genes or greater than 7.5% mitochondrial gene content were removed prior to data normalization and scaling. Principal component analysis was used to identify major sources of variation within the dataset, and gene loadings within each PC were manually inspected to ensure the capture of biologically relevant signals. For the initial round of clustering, 20 PCs were included as input to clustering and dimensionality reduction, resulting in the identification of 9 major cell classes. Cell types were identified by the overlay of canonical marker genes. Following cell type identification, each major cluster was isolated and analyzed using iterative rounds of PCA to identify finer substructure among each class. Differential gene expression testing (Wilcoxon rank sum test) was used to identify cell type specific marker genes.

## Gene Ontology analysis

Gene ontology (GO) analysis was performed using the Database for Annotation, Visualization and Integrated Discovery (DAVID) (Huang da et al., 2009).

## Data and code availability

The accession number for raw and processed data from Drop-Seq experiments reported in this paper is GEO: GSE175421. Data from this study are available from the corresponding author upon request.

## RNAscope

Superior cervical ganglia and L3-L5 dorsal root ganglia were dissected from P30-45 *C57Bl/6* mice, cryo-protected in 30% sucrose in PBS for one hour and embedded in OCT prior to being frozen at -80°C. Ganglia were cryo-sectioned at 14 µm and kept at -80°C until RNAscope was performed. Target mRNA was probed using RNAscope® Multiplex Fluorescent Reagent Kit v2 Assay. Tissues were incubated in fresh 4% paraformaldehyde for five minutes, washed twice in 1xPBS, and dehydrated with increasing concentrations of ethanol. Subsequently, the tissues were treated with hydrogen peroxide for 10 minutes and protease treatment for 15 minutes. The RNAscope assay was performed following the manufacturer's instructions. *Kcnj10* and *Fabp7* are two genes known to be specific to satellite glia and were used to identify subtypes of satellite glia (Hanani and Spray, 2020).

A

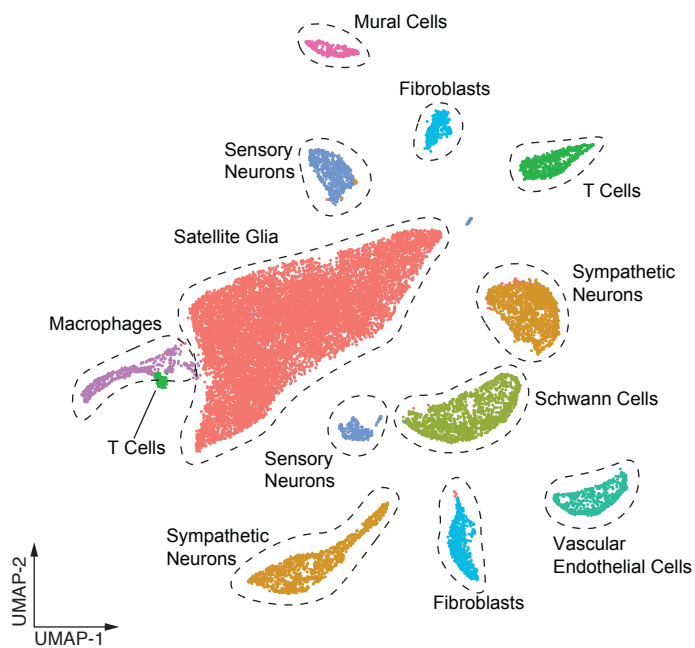

B

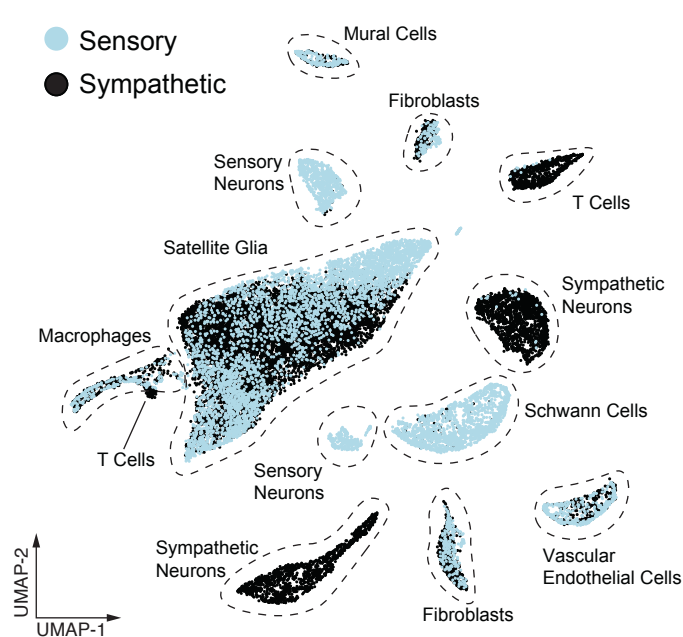

C

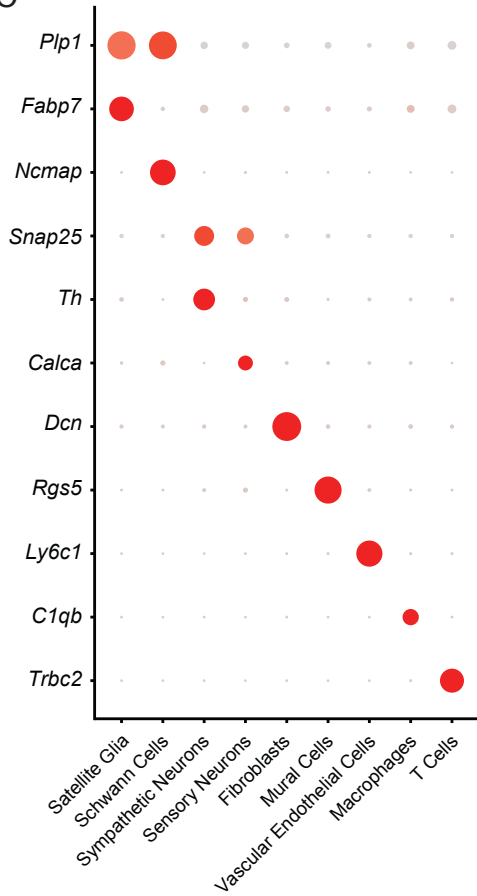

Sympathetic Neurons

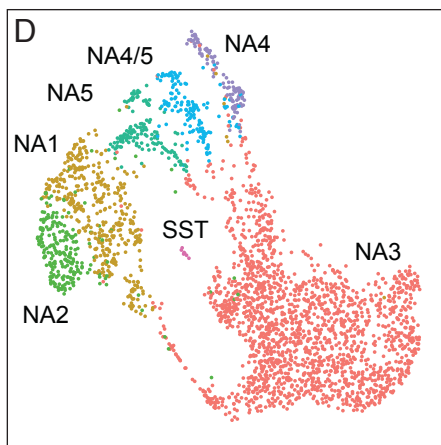

Sensory Neurons

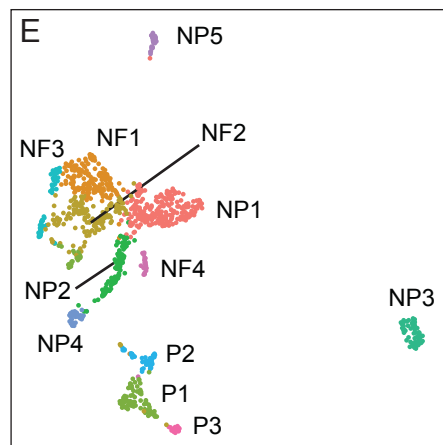

Non-Neuronal / Non-Glial Cells

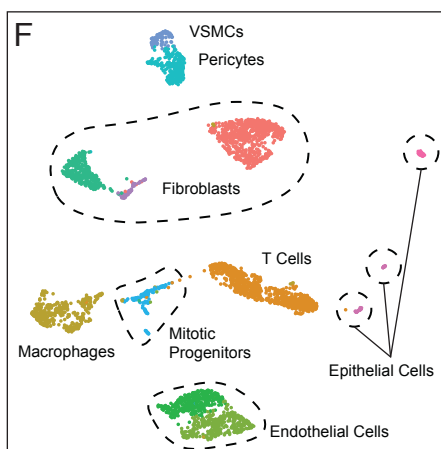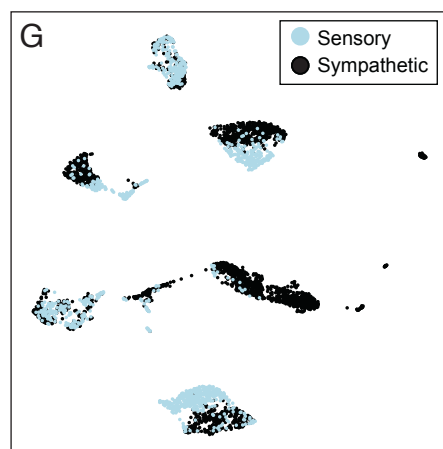

- Lum+ Fibroblasts
- Spock2+ Endothelial Cells
- Vascular Smooth Muscle Cells
- T Cells
- Cldn1+ Fibroblasts
- Sfrp4+ Fibroblasts
- Macrophages
- Pericytes
- Krt14+ Epithelial Cells
- Aqp1+ Endothelial Cells
- Mitotic Progenitors
- Ki+ Epithelial Cells



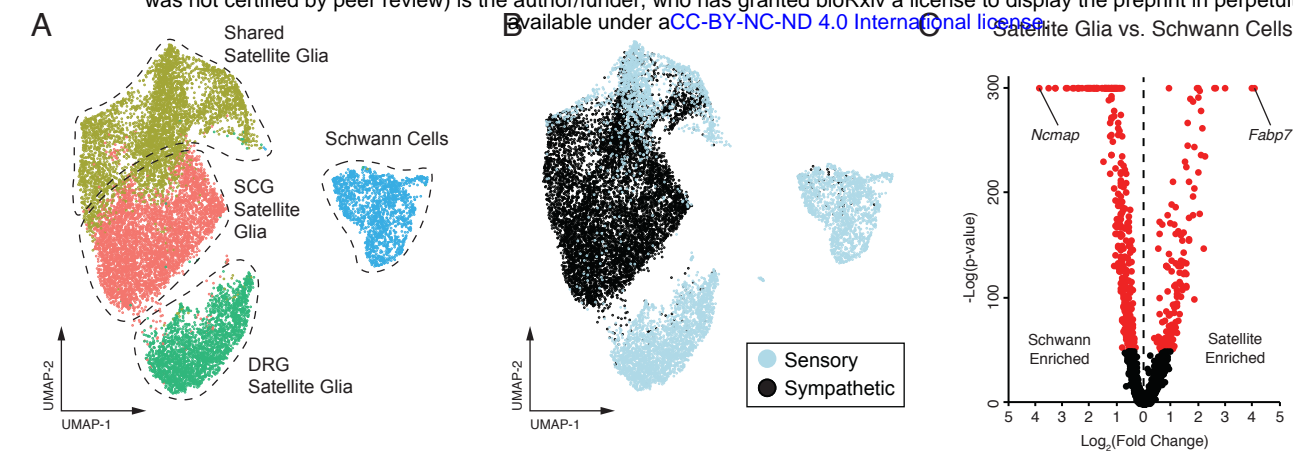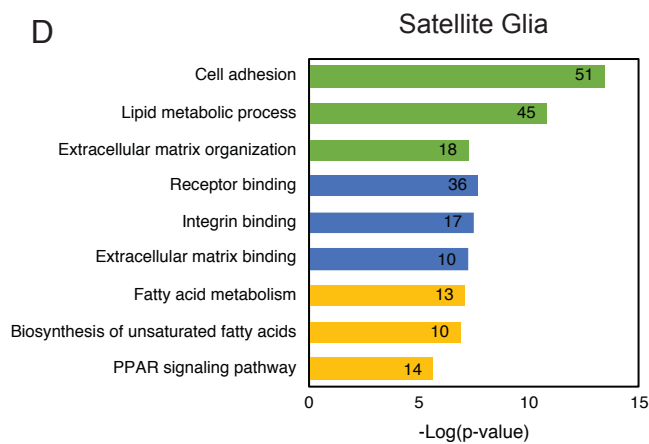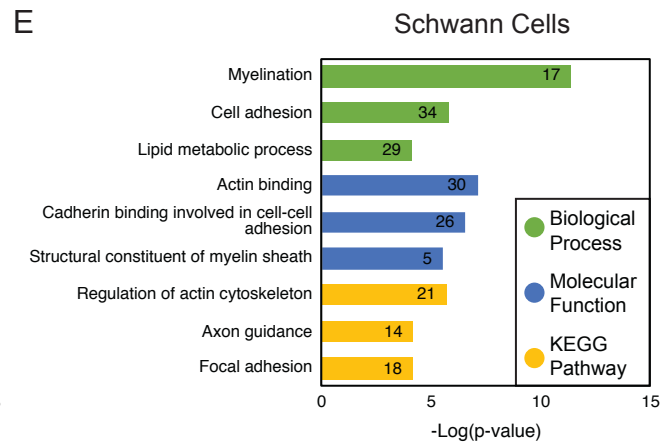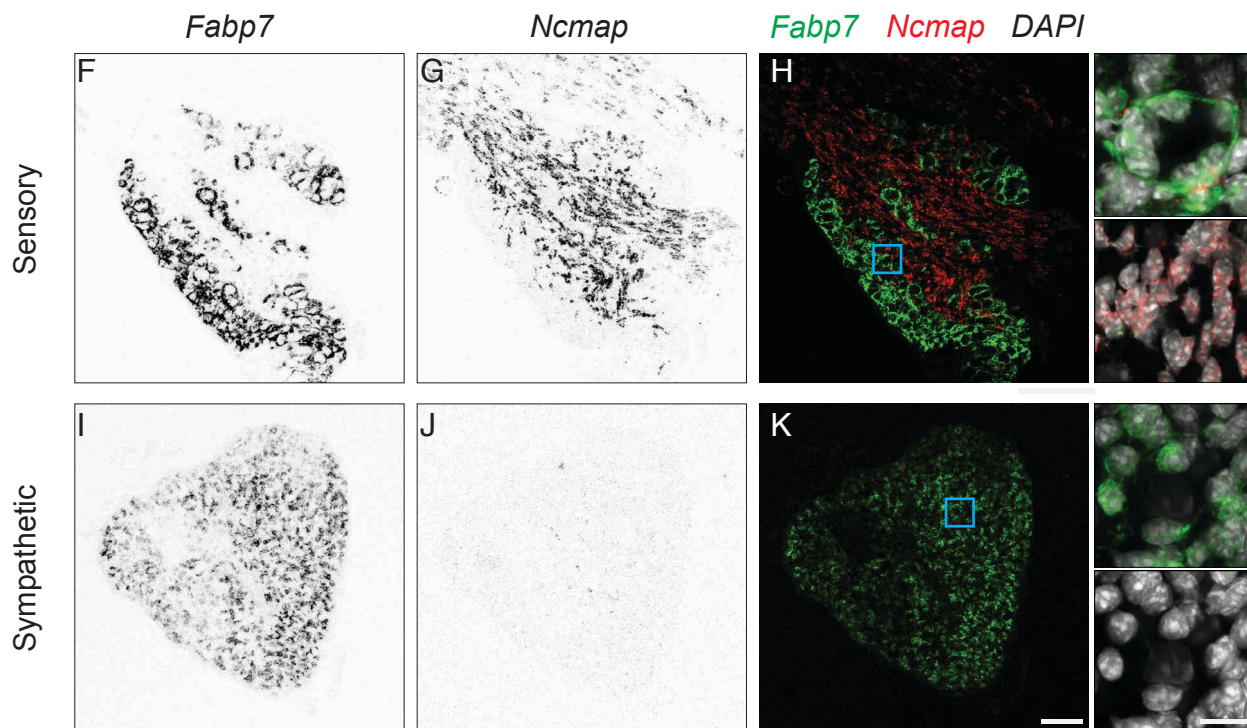

A

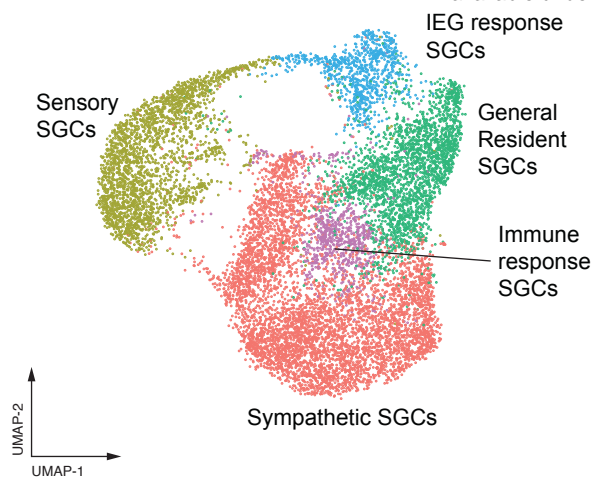

B

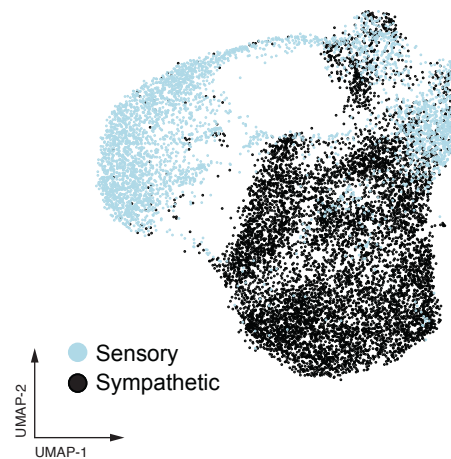

C

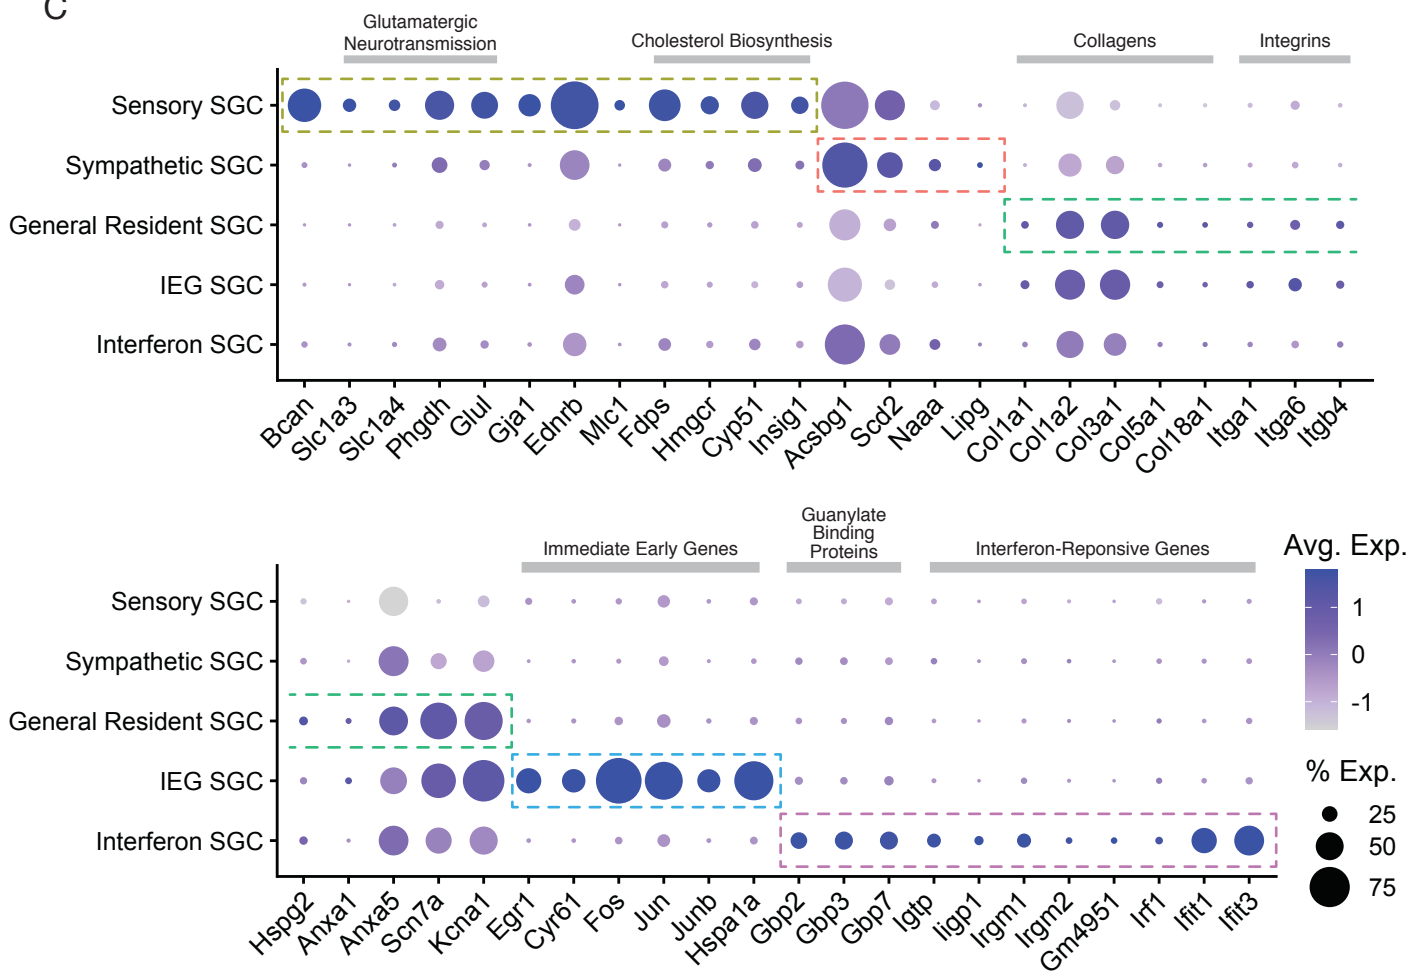



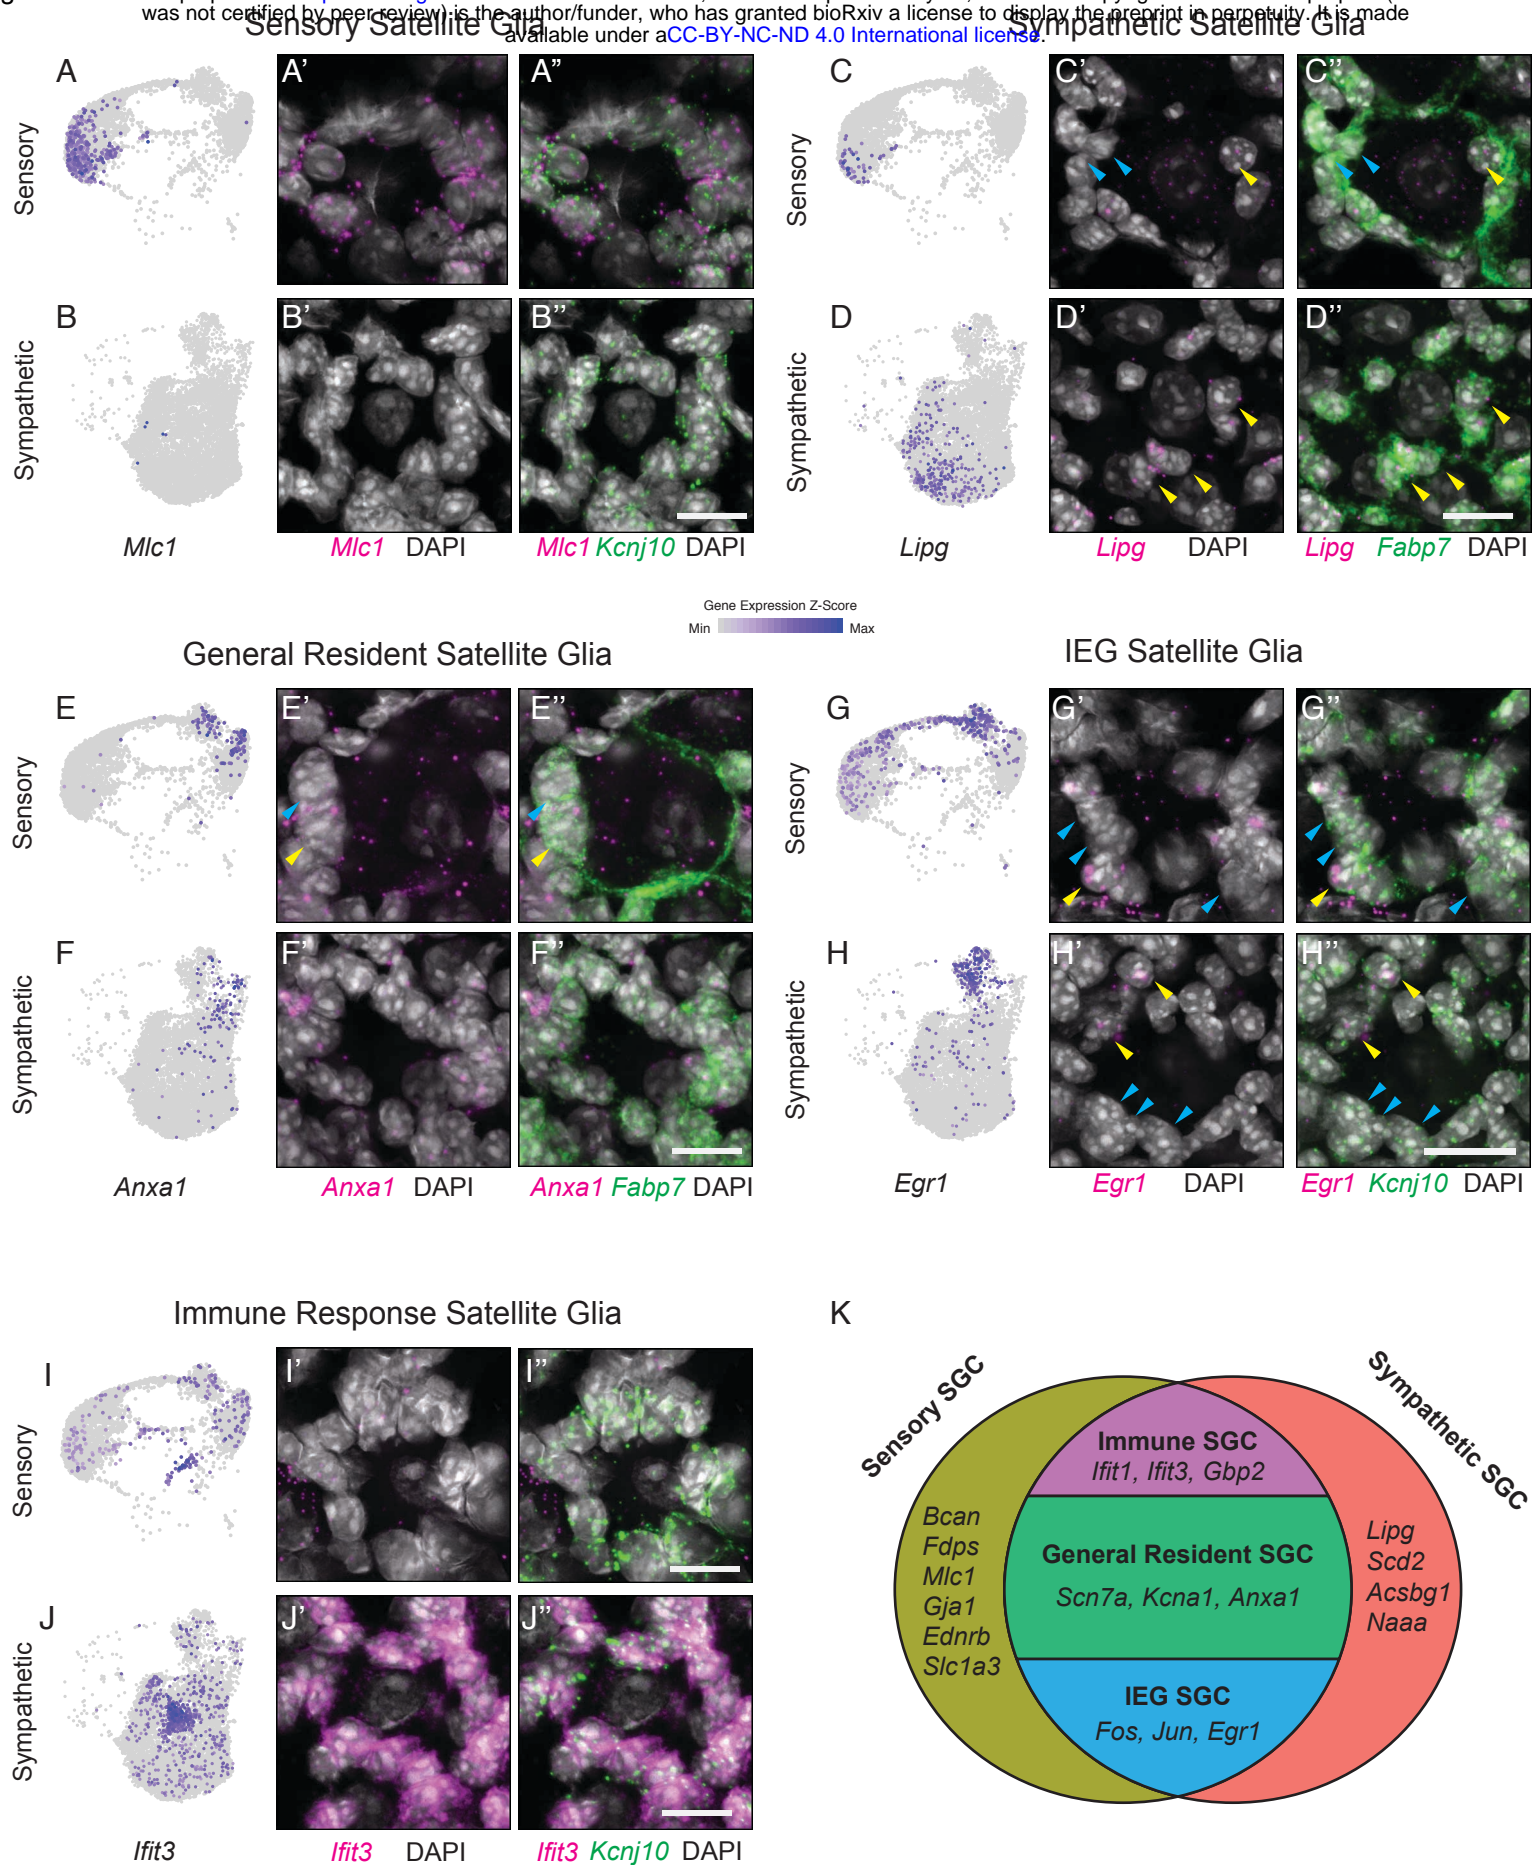

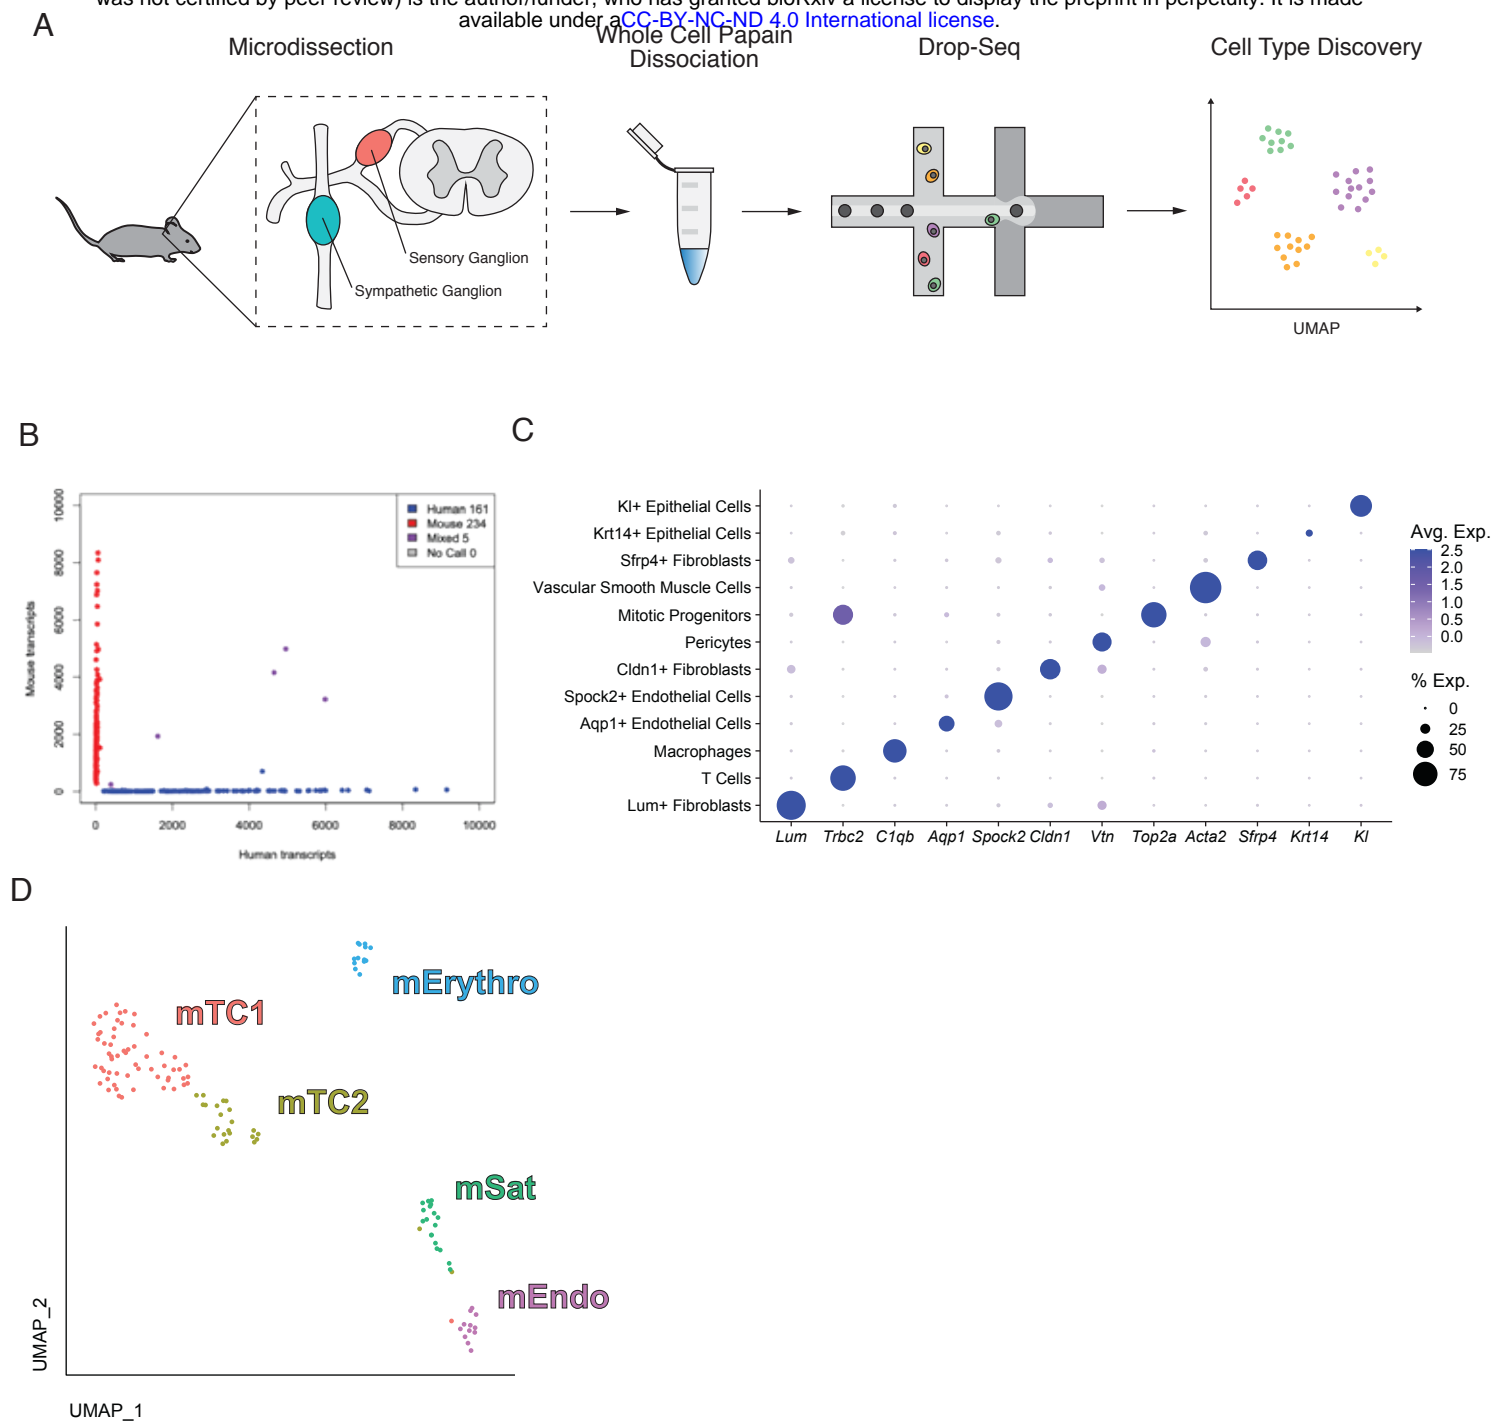

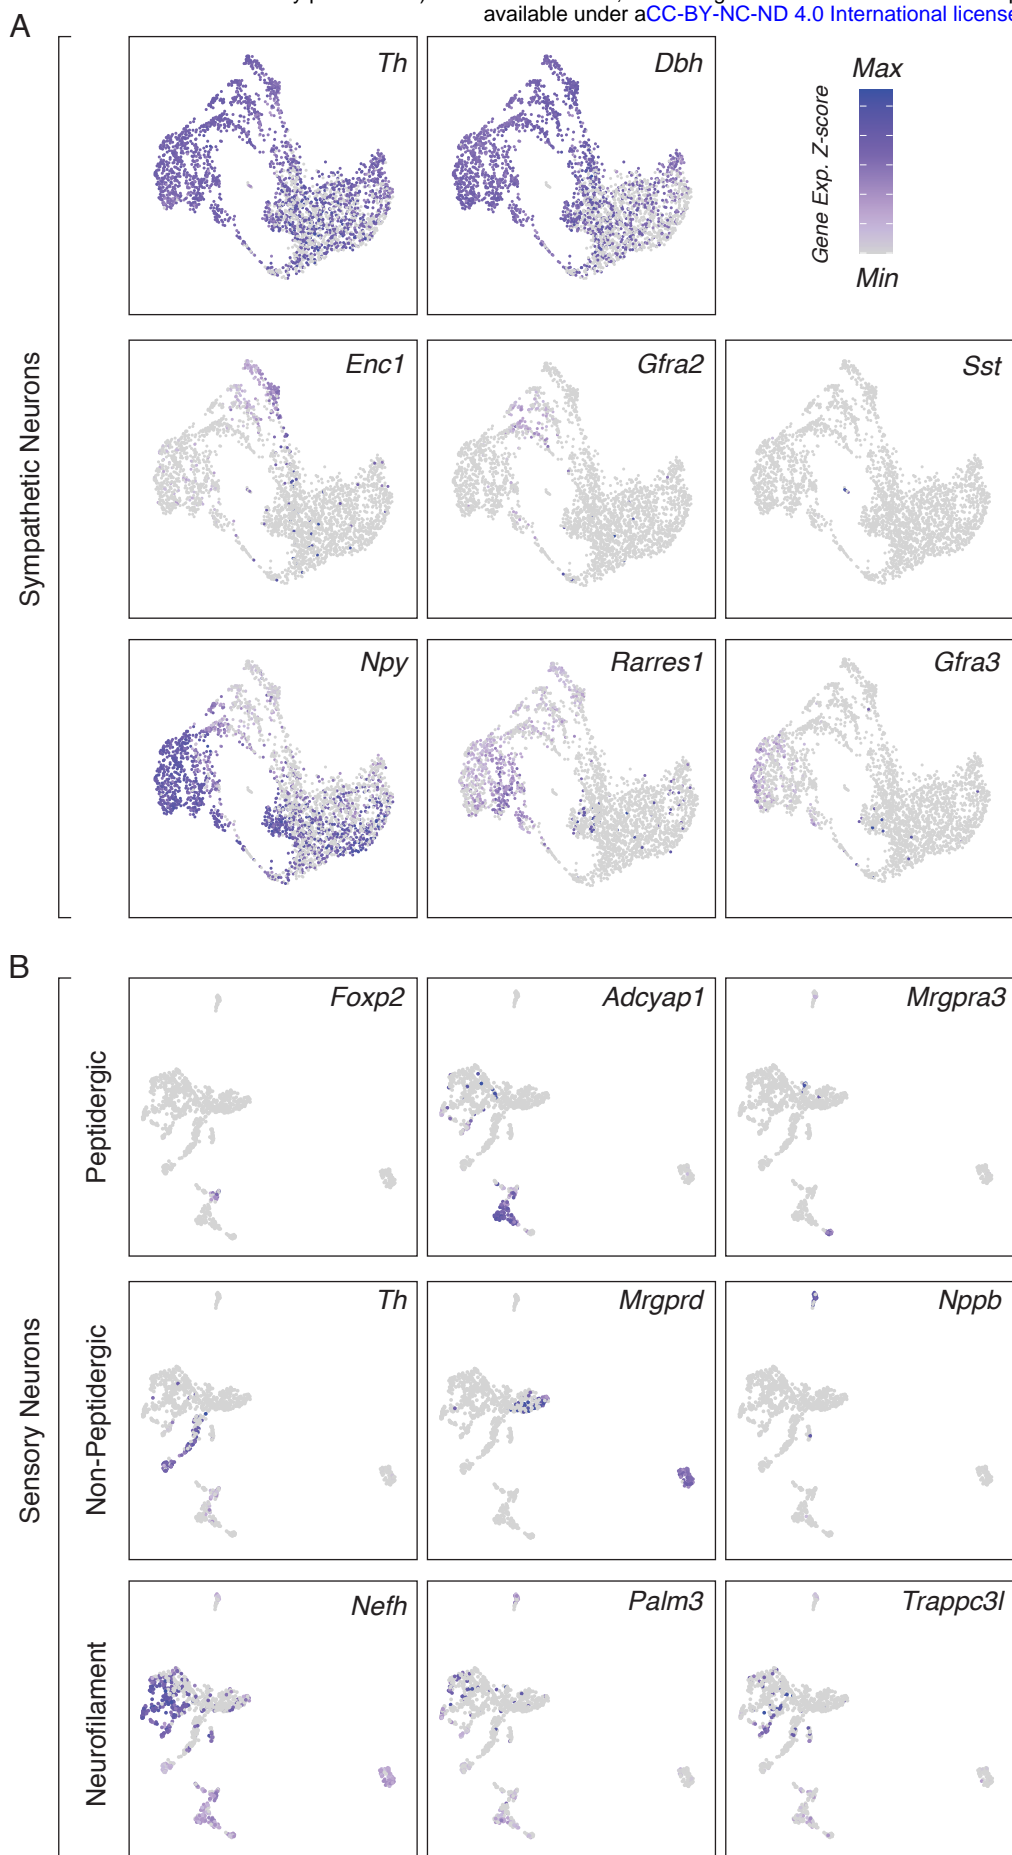



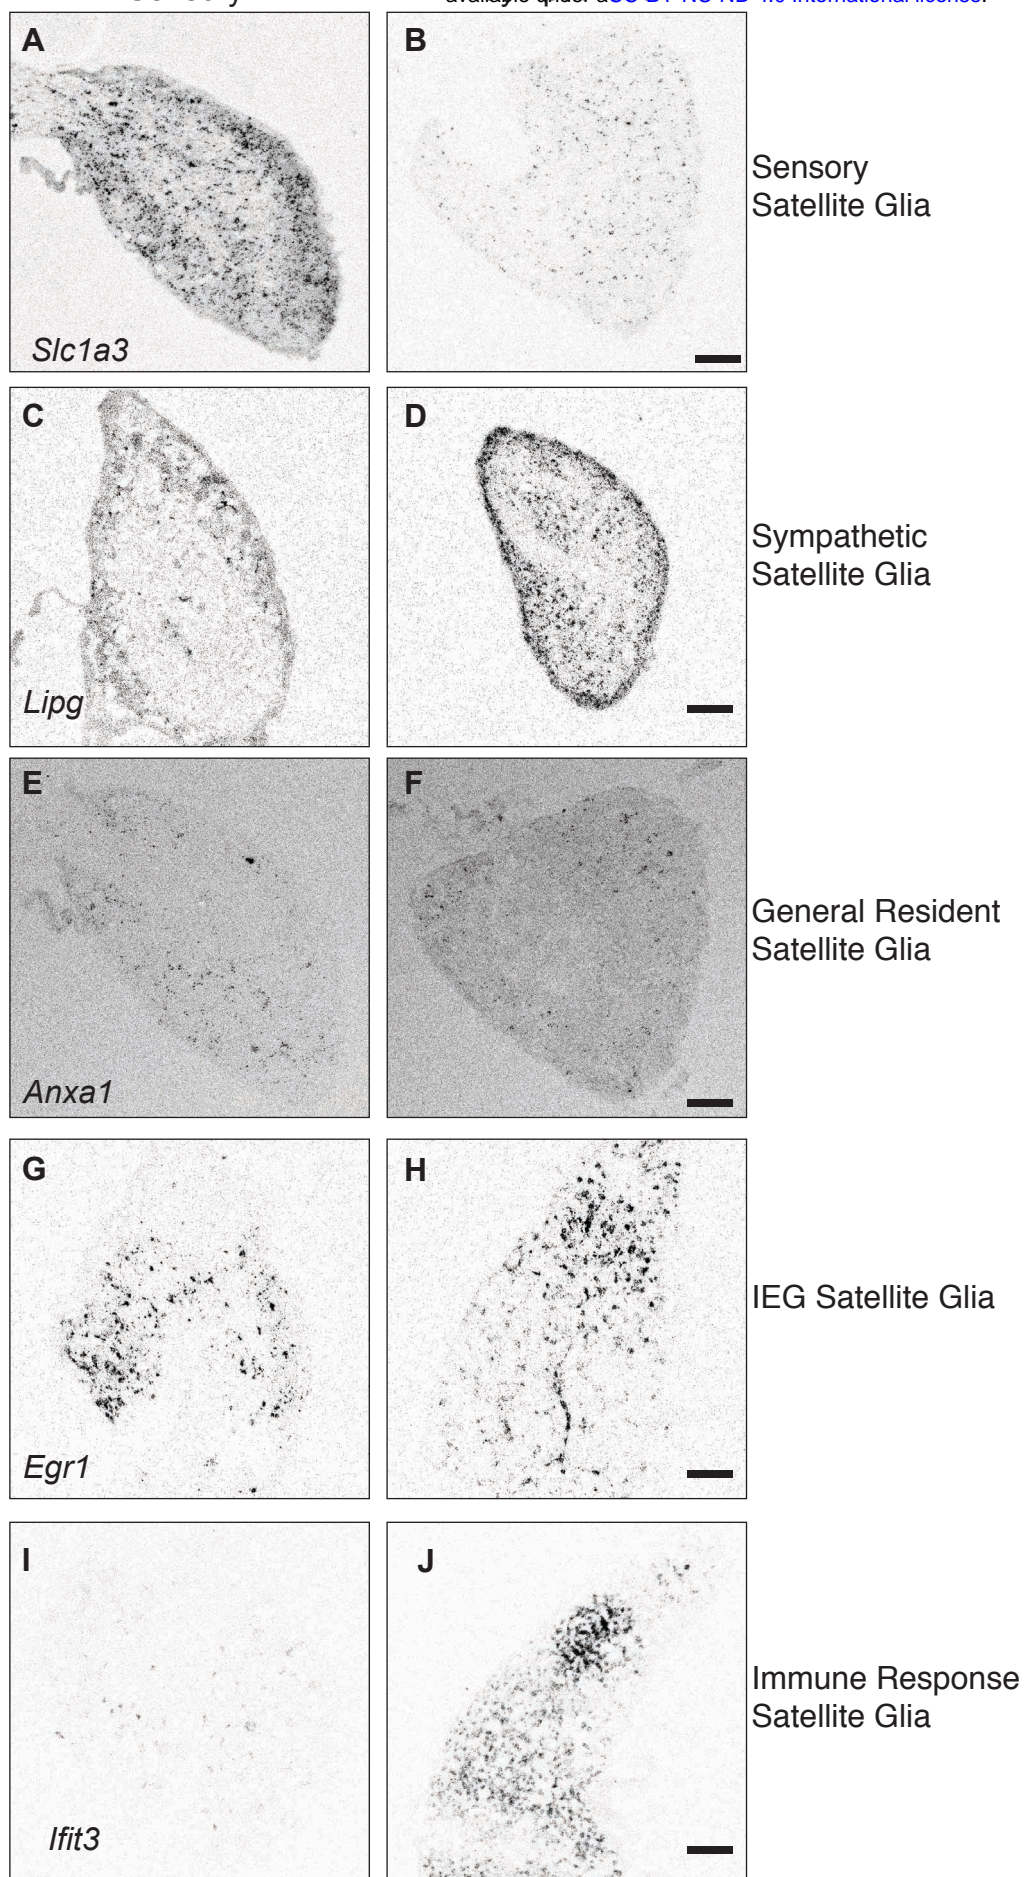

supplemental-file-1.xlsx

Title: Gene expression comparison between satellite glia and Sch

"log fold-chage of the average expression between the two groups. Positive values indicate that the gene is more highly expressed in the first group"

The percentage of Schwann cells where the gene is detected

| gene name | p_val | avg_logFC   | pct.1 |
|-----------|-------|-------------|-------|
| Ncmap     | 0     | 3.828223946 | 0.893 |
| Mpz       | 0     | 3.486413073 | 0.998 |
| Pmp22     | 0     | 3.236088711 | 0.994 |
| Prx       | 0     | 3.214040785 | 0.833 |
| Fam178b   | 0     | 2.85511375  | 0.684 |
| Plip      | 0     | 2.778886011 | 0.703 |
| Cldn19    | 0     | 2.597359036 | 0.651 |
| Mbp       | 0     | 2.558737941 | 0.988 |
| Ugt8a     | 0     | 2.409491244 | 0.603 |
| Secisbp2l | 0     | 2.389800272 | 0.833 |
| Ogn       | 0     | 2.385169342 | 0.688 |
| Mfap5     | 0     | 2.337695301 | 0.408 |
| Cdkn1a    | 0     | 2.254879576 | 0.804 |
| Fa2h      | 0     | 2.091401864 | 0.5   |
| Drp2      | 0     | 2.070034692 | 0.454 |
| Fxyd6     | 0     | 2.025850096 | 0.59  |
| Mlip      | 0     | 2.008161641 | 0.47  |
| Slc36a2   | 0     | 1.989800606 | 0.428 |
| Dusp15    | 0     | 1.955104429 | 0.436 |
| Emid1     | 0     | 1.944339616 | 0.385 |
| Bcas1     | 0     | 1.911598297 | 0.462 |
| Spp1      | 0     | 1.83497662  | 0.217 |
| Ecsr      | 0     | 1.820200113 | 0.373 |
| Pmp2      | 0     | 1.802859181 | 0.207 |
| Rasal2    | 0     | 1.782229496 | 0.511 |
| Cav1      | 0     | 1.752950719 | 0.359 |
| Fxyd3     | 0     | 1.705895945 | 0.477 |
| Smtn      | 0     | 1.705409171 | 0.452 |
| Mras      | 0     | 1.688035232 | 0.404 |
| Mag       | 0     | 1.687394432 | 0.499 |
| Gldn      | 0     | 1.638641659 | 0.324 |

|               |           |              |       |
|---------------|-----------|--------------|-------|
| Sept3         | 0         | 1.524339628  | 0.306 |
| Kcnk1         | 0         | 1.496884866  | 0.296 |
| B230206H07Rik | 0         | 1.421100147  | 0.254 |
| Arhgap19      | 0         | 1.408248028  | 0.276 |
| Cdkn1b        | 0         | 1.407156704  | 0.553 |
| Cadm3         | 0         | 1.394204063  | 0.319 |
| Fut8          | 0         | 1.373745255  | 0.339 |
| Srgn          | 0         | 1.367364499  | 0.218 |
| Limch1        | 0         | 1.337507078  | 0.644 |
| Kras          | 0         | 1.326204647  | 0.344 |
| Pou3f1        | 0         | 1.294953558  | 0.26  |
| Sult1a1       | 0         | 1.267702324  | 0.364 |
| Gypc          | 0         | 1.263119614  | 0.254 |
| Nfasc         | 0         | 1.239327838  | 0.238 |
| Mal           | 0         | 1.208631524  | 0.812 |
| Elovl7        | 0         | 1.177896886  | 0.235 |
| Egr2          | 0         | 1.175260186  | 0.213 |
| Filip1        | 0         | 1.167361735  | 0.202 |
| Cd9           | 0         | 1.156527031  | 0.959 |
| Eif1          | 0         | 1.101426172  | 0.836 |
| Cnp           | 0         | 1.092190171  | 0.839 |
| Stxbp6        | 0         | 1.070459658  | 0.186 |
| Cryab         | 0         | 1.065345027  | 0.936 |
| Gjb1          | 0         | 1.044081873  | 0.182 |
| Sema5a        | 0         | 1.038374127  | 0.187 |
| 2610034M16Rik | 0         | 0.996741545  | 0.15  |
| Frzb          | 0         | 0.990925909  | 0.167 |
| Mme           | 0         | 0.977428576  | 0.17  |
| Ndrp1         | 0         | 0.967644401  | 0.885 |
| Fgf7          | 0         | 0.941371773  | 0.152 |
| H2-DMA        | 0         | 0.936362002  | 0.158 |
| Sgk1          | 0         | 0.884140594  | 0.158 |
| Ddn           | 0         | 0.870527747  | 0.14  |
| H2-DMb1       | 0         | 0.786715952  | 0.124 |
| Vim           | 0         | -0.961604723 | 0.702 |
| Dbi           | 0         | -1.988860681 | 0.707 |
| Rarres2       | 0         | -2.062672158 | 0.124 |
| Ptn           | 0         | -2.623190206 | 0.03  |
| Cst3          | 0         | -2.671885039 | 0.415 |
| Sparcl1       | 0         | -3.035195601 | 0.047 |
| Apoe          | 0         | -4.037064531 | 0.363 |
| Fabp7         | 0         | -4.094720155 | 0.081 |
| Mboat1        | 3.96E-305 | 0.823536495  | 0.134 |



|               |           |              |       |
|---------------|-----------|--------------|-------|
| Abca8a        | 8.08E-299 | -2.095257488 | 0.045 |
| Tmem134       | 4.45E-293 | 1.183218234  | 0.44  |
| Ifitm3        | 1.66E-291 | -2.039774525 | 0.05  |
| Ptpre         | 2.55E-290 | 1.165519996  | 0.364 |
| Ttyh1         | 2.95E-290 | -1.740952208 | 0.146 |
| Neat1         | 5.45E-289 | 1.272518567  | 0.548 |
| Id3           | 8.66E-289 | -1.825184353 | 0.135 |
| Fgf1          | 9.50E-280 | 1.076345293  | 0.279 |
| Mmd2          | 1.21E-279 | -2.145557323 | 0.015 |
| Mob3b         | 3.85E-275 | 0.792617836  | 0.134 |
| Gnai1         | 1.67E-274 | 1.08583965   | 0.402 |
| Utrn          | 2.72E-273 | 1.154058354  | 0.505 |
| Metrn1        | 8.32E-272 | 1.140732574  | 0.308 |
| Atp1b3        | 3.93E-268 | 1.222871974  | 0.503 |
| Vat1l         | 5.90E-268 | 0.929832185  | 0.189 |
| Lpar1         | 2.14E-267 | -1.656116688 | 0.136 |
| Nr4a2         | 8.53E-263 | 0.907294374  | 0.188 |
| Ednrb         | 9.90E-263 | -2.172569675 | 0.05  |
| Tjp2          | 1.70E-260 | 0.866586858  | 0.169 |
| Cav2          | 1.28E-256 | 0.932985335  | 0.193 |
| Plekha4       | 3.26E-256 | 1.147840558  | 0.584 |
| Rasgef1a      | 1.24E-255 | 0.773047952  | 0.111 |
| Elovl1        | 3.92E-255 | 1.226408804  | 0.484 |
| Qk            | 1.99E-250 | 1.100298111  | 0.68  |
| Marcks        | 5.24E-246 | -1.644063016 | 0.14  |
| Matn2         | 3.89E-245 | -1.915087783 | 0.083 |
| Entpd2        | 6.41E-238 | -2.163933106 | 0.008 |
| Adam10        | 6.70E-238 | 1.177173402  | 0.491 |
| Smco3         | 1.93E-237 | 1.168827895  | 0.299 |
| B3galt2       | 3.37E-236 | 0.757029697  | 0.124 |
| Sfrp1         | 1.49E-235 | -2.289652991 | 0.016 |
| Prdx6         | 4.13E-231 | -1.564289986 | 0.154 |
| Fos           | 9.90E-231 | 1.476961927  | 0.406 |
| Plcb1         | 3.41E-229 | 0.840596497  | 0.133 |
| 9530059O14Rik | 9.02E-227 | 0.711313939  | 0.106 |
| H2-K1         | 5.60E-226 | -1.576881208 | 0.118 |
| Nrbp2         | 9.30E-225 | 1.002996539  | 0.222 |
| D430041D05Rik | 7.40E-224 | 0.645936846  | 0.096 |
| Igfbp4        | 8.46E-221 | -2.054881879 | 0.006 |
| Usp6nl        | 1.11E-220 | 0.809823277  | 0.162 |
| Malat1        | 4.11E-220 | 0.838583307  | 0.949 |
| Mt3           | 9.97E-220 | 1.210551204  | 0.293 |
| Spint1        | 5.71E-219 | 0.597523567  | 0.082 |

|         |           |              |       |
|---------|-----------|--------------|-------|
| Carns1  | 1.43E-213 | 0.83440858   | 0.157 |
| H2-D1   | 4.40E-212 | -1.123786441 | 0.204 |
| Scg3    | 7.10E-212 | -1.703932318 | 0.048 |
| Il16    | 6.86E-211 | 0.637799904  | 0.094 |
| Plekha7 | 8.07E-211 | 0.814354223  | 0.155 |
| Frmd3   | 1.63E-207 | 0.803806771  | 0.164 |
| Fam81a  | 1.13E-206 | 0.711313484  | 0.092 |
| Lrrtm1  | 5.17E-206 | -1.878427471 | 0.013 |
| Osbpl1a | 1.07E-205 | 1.049518879  | 0.396 |
| Ypel2   | 3.21E-202 | 0.633615142  | 0.121 |
| Tspan17 | 2.75E-200 | 0.934957368  | 0.271 |
| Prrg3   | 6.40E-198 | 0.81026434   | 0.17  |
| Acsbg1  | 1.49E-197 | -1.844291347 | 0.01  |
| Aif1l   | 3.97E-194 | 1.020292954  | 0.252 |
| Sbson   | 9.55E-193 | 0.779177434  | 0.356 |
| Auts2   | 1.50E-192 | 0.912206827  | 0.182 |
| Cnn3    | 7.89E-191 | -1.054920083 | 0.363 |
| Npepl1  | 4.68E-189 | 0.891851455  | 0.251 |
| Gpr37l1 | 2.78E-188 | -1.196165185 | 0.24  |
| Ptpdc1  | 2.34E-187 | 0.785536742  | 0.167 |
| Chrdl1  | 1.12E-186 | 0.648278549  | 0.1   |
| Gatm    | 2.34E-185 | 0.715839736  | 0.838 |
| St8sia5 | 4.16E-185 | 0.465037322  | 0.069 |
| Fth1    | 4.15E-183 | 0.776477335  | 0.958 |
| Igfbp7  | 5.64E-181 | -2.099611877 | 0.016 |
| Efhd1   | 8.05E-181 | 0.793422139  | 0.25  |
| Fscn1   | 1.12E-180 | 0.810462333  | 0.202 |
| Slc43a3 | 1.29E-180 | -1.820885534 | 0.011 |
| Prnp    | 1.69E-179 | -0.914165583 | 0.527 |
| Efcc1   | 9.67E-179 | 0.522461057  | 0.07  |
| Aldoc   | 8.46E-178 | -1.713341845 | 0.039 |
| Tmem189 | 7.45E-177 | 0.853539818  | 0.186 |
| Cd55    | 2.05E-176 | 0.851803629  | 0.175 |
| Tiparp  | 6.67E-176 | 0.933525504  | 0.197 |
| Rnf7    | 1.03E-175 | 0.972079498  | 0.514 |
| Sptlc2  | 1.17E-175 | 0.811164644  | 0.194 |
| Chn2    | 1.11E-173 | 0.497896763  | 0.081 |
| Itm2b   | 1.67E-173 | -0.620380996 | 0.764 |
| Itm2a   | 2.37E-173 | 0.913546946  | 0.511 |
| Atp1a2  | 4.65E-173 | -1.004080999 | 0.281 |
| Sema6c  | 7.88E-173 | 0.559267239  | 0.075 |
| Fosb    | 1.93E-172 | 0.939844651  | 0.125 |
| Ybx1    | 3.31E-172 | 0.849803004  | 0.72  |

|               |           |              |       |
|---------------|-----------|--------------|-------|
| Stmn1         | 1.39E-171 | 0.952801503  | 0.346 |
| Gnas          | 7.70E-171 | -0.69485387  | 0.661 |
| Gsn           | 1.18E-170 | -1.168745152 | 0.364 |
| Junb          | 3.86E-170 | 1.013247084  | 0.239 |
| Ppm1l         | 7.29E-170 | 0.837198275  | 0.235 |
| Myo1b         | 2.15E-169 | 0.588809915  | 0.094 |
| 1810011O10Rik | 6.70E-169 | 0.606063567  | 0.088 |
| Lox           | 6.93E-169 | 0.523188188  | 0.068 |
| 4930506M07Rik | 8.35E-169 | 0.802228374  | 0.137 |
| Plekhb1       | 1.15E-168 | 0.841059227  | 0.7   |
| Mapk8ip1      | 2.11E-168 | 0.987183221  | 0.287 |
| Atxn1         | 2.78E-167 | 0.659926997  | 0.105 |
| Ndr2          | 2.96E-165 | -1.287857397 | 0.171 |
| Rnf128        | 1.25E-164 | 0.544669758  | 0.084 |
| Cald1         | 4.06E-163 | -1.485081473 | 0.052 |
| Gpm6a         | 1.13E-162 | 0.967562983  | 0.229 |
| Itga6         | 2.03E-162 | 0.857223077  | 0.343 |
| Gas2l3        | 2.27E-162 | 0.839726792  | 0.332 |
| Gpm6b         | 3.61E-162 | -0.634599432 | 0.672 |
| Sdc4          | 4.79E-162 | -1.190698711 | 0.207 |
| Dhcr24        | 9.85E-162 | 1.017968667  | 0.385 |
| Scd1          | 1.40E-160 | -1.408533859 | 0.151 |
| Dynll1        | 1.65E-160 | 0.749943229  | 0.754 |
| Fryl          | 2.40E-159 | 0.832936318  | 0.179 |
| S1pr3         | 1.40E-157 | -1.707565584 | 0.012 |
| Tmcc3         | 1.80E-156 | 0.635581506  | 0.103 |
| Mapre2        | 2.13E-156 | -1.460880397 | 0.056 |
| Fbln2         | 3.38E-156 | -1.679840224 | 0.019 |
| Kdr           | 6.32E-156 | 0.43797467   | 0.072 |
| Otop1         | 3.16E-154 | 0.46823519   | 0.059 |
| Sptb          | 2.23E-151 | 0.449573929  | 0.057 |
| Kif1a         | 5.88E-151 | 0.898612448  | 0.294 |
| Kazn          | 9.32E-151 | 0.512345573  | 0.072 |
| Zfyve19       | 1.11E-150 | 0.751851219  | 0.148 |
| Shc4          | 5.17E-150 | 0.912865971  | 0.278 |
| Scn7a         | 2.00E-148 | -2.224497652 | 0.024 |
| B2m           | 3.49E-148 | -0.581244976 | 0.742 |
| Dock9         | 1.07E-147 | 0.700158537  | 0.119 |
| Spon2         | 2.56E-147 | 0.427101684  | 0.075 |
| St6gal1       | 3.22E-147 | 0.794591143  | 0.237 |
| Csrp2         | 1.17E-146 | 0.830813183  | 0.121 |
| Casq1         | 1.57E-146 | 0.379407298  | 0.06  |
| Klrb1a        | 2.10E-146 | 0.41377226   | 0.06  |

|          |           |              |       |
|----------|-----------|--------------|-------|
| Vit      | 6.36E-145 | 0.463065449  | 0.066 |
| Tspan7   | 2.56E-144 | -1.492412478 | 0.024 |
| Sostdc1  | 4.02E-143 | -0.979931831 | 0.355 |
| Cuedc2   | 3.52E-142 | 0.993765166  | 0.454 |
| Gadd45b  | 3.97E-141 | 0.644869332  | 0.085 |
| Setd8    | 1.47E-140 | 0.812151611  | 0.239 |
| Mpp6     | 6.35E-140 | 0.821532747  | 0.158 |
| Rimklb   | 2.21E-139 | 0.584299715  | 0.089 |
| P2ry2    | 5.41E-139 | 0.55961093   | 0.098 |
| Vwa1     | 3.33E-137 | -1.065727096 | 0.299 |
| Ccdc37   | 6.96E-137 | 0.782717425  | 0.176 |
| Ntrk2    | 1.29E-136 | -1.420308966 | 0.027 |
| Emp3     | 8.35E-136 | -1.44547425  | 0.029 |
| Pdlim4   | 2.66E-135 | -1.481770594 | 0.024 |
| Chst2    | 4.99E-135 | 0.411216723  | 0.059 |
| Aspa     | 2.87E-134 | -1.181199564 | 0.159 |
| Bace2    | 4.78E-134 | 0.525421173  | 0.085 |
| Slc35f1  | 5.95E-134 | -1.5796562   | 0.025 |
| Maf      | 1.06E-133 | 0.910777564  | 0.474 |
| Aatk     | 1.08E-133 | 0.834621919  | 0.473 |
| Abhd12   | 1.38E-133 | 0.805681346  | 0.293 |
| Sertad1  | 3.70E-133 | 0.779536798  | 0.198 |
| Clstn1   | 1.23E-132 | 0.853208993  | 0.287 |
| Arpc1b   | 3.96E-132 | -0.874207803 | 0.422 |
| Abca2    | 5.39E-132 | 0.73934783   | 0.14  |
| Peli2    | 6.97E-132 | 0.852026383  | 0.198 |
| Slc9a3r1 | 1.51E-131 | -1.380928324 | 0.07  |
| Rhoc     | 3.19E-131 | -1.31496504  | 0.085 |
| Cmtm5    | 3.39E-131 | -0.862340408 | 0.377 |
| Hspa1a   | 3.42E-131 | 1.0476561    | 0.334 |
| Glod4    | 5.92E-131 | 0.893281797  | 0.29  |
| Fxyd1    | 8.08E-131 | -0.905606477 | 0.367 |
| Map6     | 4.49E-128 | 0.611932294  | 0.131 |
| Nes      | 6.15E-127 | 0.849342352  | 0.199 |
| Cers2    | 1.17E-126 | 0.851731081  | 0.412 |
| Mlec     | 2.28E-126 | 0.794897919  | 0.265 |
| Radil    | 2.81E-126 | 0.420706064  | 0.059 |
| Tmod2    | 4.88E-126 | -1.049658881 | 0.185 |
| Htra1    | 1.15E-125 | -1.555117865 | 0.007 |
| Fbln5    | 1.35E-125 | -1.365014364 | 0.106 |
| Magi2    | 1.93E-124 | 0.629736278  | 0.106 |
| Chl1     | 4.49E-124 | -1.587354551 | 0.013 |
| Ccnd1    | 1.21E-123 | -1.491527388 | 0.014 |

|           |           |              |       |
|-----------|-----------|--------------|-------|
| Tagln     | 1.09E-120 | 0.677146731  | 0.109 |
| Arhgap24  | 1.33E-120 | 0.673686999  | 0.168 |
| Stk39     | 1.46E-120 | 0.726539348  | 0.154 |
| Ivns1abp  | 8.11E-120 | 0.751471777  | 0.341 |
| Lzts2     | 2.68E-118 | 0.771745263  | 0.2   |
| Cmb1      | 4.35E-118 | 0.571081691  | 0.113 |
| Plekhf1   | 5.59E-118 | 0.507850285  | 0.087 |
| Nkain4    | 4.76E-117 | -1.362045469 | 0.014 |
| Serpind1  | 8.87E-117 | 0.440205354  | 0.075 |
| Pdlim2    | 1.27E-116 | 0.611076827  | 0.133 |
| Deb1      | 7.63E-115 | 0.835379457  | 0.298 |
| Cadm1     | 1.86E-114 | -1.222628983 | 0.084 |
| Ptprz1    | 3.01E-113 | -1.39885335  | 0.002 |
| Pacs2     | 6.38E-113 | 0.656541996  | 0.146 |
| Add3      | 9.97E-113 | -1.141665111 | 0.12  |
| Lect1     | 1.19E-112 | -1.575605859 | 0.013 |
| Dclk3     | 6.81E-112 | 0.493347645  | 0.085 |
| Postn     | 2.48E-111 | -1.577900987 | 0.008 |
| Gng2      | 5.84E-111 | 0.764698318  | 0.438 |
| Hspb2     | 7.26E-111 | 0.679466154  | 0.218 |
| Slc3a2    | 2.04E-110 | 0.824630559  | 0.376 |
| Nav1      | 6.20E-110 | 0.516433763  | 0.12  |
| Clcn2     | 9.67E-110 | 0.549271373  | 0.119 |
| Mmgt2     | 3.80E-109 | 0.703819843  | 0.127 |
| Lysmd2    | 4.48E-109 | -1.237995787 | 0.047 |
| Depdc7    | 5.29E-109 | 0.710776037  | 0.155 |
| Elmo1     | 8.86E-109 | 0.511287405  | 0.088 |
| Sema4g    | 1.51E-108 | 0.356742714  | 0.057 |
| Mpdz      | 1.60E-108 | 0.782477969  | 0.238 |
| Cp        | 3.59E-108 | -1.437630488 | 0.008 |
| Ccser2    | 2.08E-107 | 0.800850459  | 0.4   |
| Sh3bp5    | 2.91E-107 | 0.765724028  | 0.314 |
| Ifi27     | 3.14E-107 | -0.892829526 | 0.202 |
| Ak5       | 3.82E-106 | 0.467015545  | 0.075 |
| Elovl5    | 6.49E-105 | -1.24466557  | 0.03  |
| Tnfaip8l1 | 6.24E-104 | 0.556689516  | 0.08  |
| Sccpdh    | 2.07E-103 | 0.736898774  | 0.261 |
| Wnt6      | 2.66E-103 | -1.322170509 | 0.008 |
| Prss35    | 6.39E-103 | -1.274901581 | 0.029 |
| Fam129a   | 7.99E-103 | -1.382324069 | 0.004 |
| Nek1      | 3.08E-101 | 0.742835718  | 0.341 |
| Faah      | 7.56E-101 | 0.497998583  | 0.084 |
| Calm1     | 9.43E-101 | -0.588168792 | 0.573 |

|          |           |              |       |
|----------|-----------|--------------|-------|
| Prss12   | 6.99E-100 | 0.623673191  | 0.192 |
| Ifi27l2a | 2.91E-99  | -1.890223377 | 0.009 |
| Swap70   | 1.09E-98  | 0.600843823  | 0.109 |
| Nrep     | 4.60E-97  | 0.655310426  | 0.165 |
| Mapre3   | 5.66E-97  | 0.67473229   | 0.148 |
| Tspan18  | 1.11E-96  | -1.262982775 | 0.006 |
| Disp1    | 1.67E-96  | 0.383914962  | 0.065 |
| Cd82     | 1.37E-95  | 0.683710035  | 0.199 |
| Kif19a   | 4.12E-95  | 0.474824407  | 0.069 |
| Gprc5b   | 7.98E-95  | 0.671877012  | 0.24  |
| Gpx1     | 8.71E-95  | -1.122801532 | 0.148 |
| Oat      | 3.50E-94  | -1.151088029 | 0.07  |
| Ncam1    | 4.86E-94  | -1.227158949 | 0.015 |
| Trim2    | 8.75E-94  | -1.15351478  | 0.07  |
| Jam3     | 1.02E-93  | 0.723108946  | 0.441 |
| Ppap2a   | 1.14E-93  | 0.590776093  | 0.192 |
| Ramp2    | 2.73E-93  | -1.260235722 | 0.005 |
| Ostf1    | 3.91E-92  | 0.695185417  | 0.271 |
| Kcnj10   | 5.24E-92  | -1.152992381 | 0.022 |
| Fnbp1    | 1.90E-91  | 0.547772214  | 0.116 |
| Pip4k2a  | 2.21E-91  | 0.502509804  | 0.114 |
| Fam53b   | 2.73E-91  | 0.435311457  | 0.061 |
| Ttc9     | 7.61E-90  | 0.448104202  | 0.093 |
| Far1     | 1.20E-89  | 0.662206066  | 0.191 |
| Itpkb    | 5.72E-89  | 0.500264924  | 0.101 |
| Crtc3    | 1.09E-88  | 0.520981015  | 0.108 |
| Reep5    | 1.31E-88  | 0.673696832  | 0.361 |
| Sfrp5    | 3.32E-88  | -0.842451568 | 0.431 |
| Lsamp    | 1.56E-87  | -1.178154473 | 0.009 |
| Ckb      | 1.80E-86  | -0.619168688 | 0.511 |
| Cyp2j9   | 4.38E-86  | -1.023407818 | 0.148 |
| Sema4c   | 6.01E-86  | 0.598136617  | 0.091 |
| Col3a1   | 6.05E-86  | -1.345106101 | 0.11  |
| Shroom2  | 2.07E-85  | 0.546392913  | 0.135 |
| Lipa     | 1.35E-84  | 0.491557275  | 0.127 |
| Slc9a3r2 | 1.91E-84  | 0.581319593  | 0.172 |
| S100a16  | 2.94E-84  | -0.955637729 | 0.171 |
| Rhot1    | 4.62E-84  | 0.59680786   | 0.144 |
| Reln     | 7.19E-82  | 0.641610754  | 0.139 |
| Egr1     | 2.72E-81  | 0.759446135  | 0.188 |
| Ank      | 2.84E-81  | 0.659390488  | 0.216 |
| Slc25a1  | 4.25E-81  | 0.628957174  | 0.3   |
| Baz1a    | 4.73E-81  | 0.394788709  | 0.055 |

|          |          |              |       |
|----------|----------|--------------|-------|
| Pea15a   | 5.03E-81 | 0.704637017  | 0.517 |
| Zdhhc8   | 1.43E-80 | 0.51122078   | 0.106 |
| Alad     | 2.20E-80 | 0.632402842  | 0.168 |
| Ankrd12  | 9.94E-80 | 0.748140683  | 0.301 |
| Hmgcs2   | 3.13E-79 | -0.803717406 | 0.225 |
| Abca8b   | 3.67E-79 | -1.287573941 | 0.012 |
| Ctsl     | 1.89E-78 | -0.723229561 | 0.29  |
| Fyn      | 2.86E-78 | 0.684581729  | 0.226 |
| Spag9    | 4.82E-78 | 0.694524118  | 0.278 |
| Lcorl    | 5.64E-78 | 0.499155465  | 0.087 |
| Pmepa1   | 6.68E-78 | -1.1930354   | 0.019 |
| Ssr1     | 4.71E-77 | 0.618267561  | 0.291 |
| Sept11   | 1.70E-76 | 0.667998706  | 0.205 |
| Arxes2   | 2.51E-76 | 0.356878373  | 0.059 |
| Cdkn1c   | 4.31E-76 | 0.55435511   | 0.065 |
| Adamtsl5 | 9.67E-76 | 0.524927766  | 0.115 |
| Rbp1     | 9.78E-76 | -1.047240985 | 0.019 |
| Stx6     | 1.32E-75 | 0.606511193  | 0.165 |
| Kdelr3   | 2.65E-75 | 0.583527942  | 0.165 |
| Limk2    | 4.18E-75 | 0.479555283  | 0.1   |
| Kif13b   | 2.77E-74 | 0.409095184  | 0.055 |
| Cdh11    | 3.15E-74 | -0.978611092 | 0.024 |
| Ston1    | 3.45E-74 | 0.450698426  | 0.107 |
| Trib2    | 9.07E-74 | 0.530422238  | 0.094 |
| Fmn2     | 6.68E-73 | 0.394331852  | 0.066 |
| F3       | 8.51E-73 | -1.201551484 | 0.004 |
| Fmo1     | 2.27E-72 | -0.986140893 | 0.002 |
| Slc48a1  | 3.63E-72 | 0.555463547  | 0.198 |
| Chp2     | 7.12E-72 | 0.678861002  | 0.207 |
| Car14    | 9.71E-72 | 0.533457426  | 0.088 |
| Ptprf    | 2.62E-71 | 0.621149928  | 0.264 |
| Serhl    | 2.97E-71 | 0.551305324  | 0.131 |
| Osbpl5   | 1.07E-70 | 0.437122847  | 0.091 |
| Efemp1   | 3.95E-70 | -1.133731462 | 0.007 |
| Prkca    | 8.68E-70 | 0.422717296  | 0.1   |
| Fabp5    | 1.03E-69 | -0.87916945  | 0.139 |
| Capg     | 3.45E-69 | 0.534884998  | 0.286 |
| Atp1b2   | 4.11E-69 | -1.015133138 | 0.032 |
| Cdc42ep3 | 5.03E-69 | 0.485740581  | 0.228 |
| Ndfip2   | 8.54E-69 | 0.617418487  | 0.342 |
| Otud7b   | 1.01E-68 | 0.573067669  | 0.159 |
| Nefm     | 1.03E-68 | 0.716254241  | 0.309 |
| Bzw2     | 1.09E-68 | 0.654454701  | 0.193 |

|          |          |              |       |
|----------|----------|--------------|-------|
| Cerk     | 1.13E-68 | 0.406074282  | 0.063 |
| Ctnnal1  | 3.38E-68 | 0.6608009    | 0.345 |
| Rxrg     | 5.01E-68 | -1.242960078 | 0.001 |
| Arhgap10 | 7.19E-68 | 0.379459327  | 0.061 |
| Myl9     | 9.32E-68 | 0.622508502  | 0.259 |
| Dusp1    | 1.05E-67 | 0.520117082  | 0.074 |
| Mgll     | 1.13E-67 | 0.556306328  | 0.313 |
| Gfra1    | 1.48E-67 | 0.476746898  | 0.102 |
| Pdrg1    | 2.19E-67 | 0.587163216  | 0.266 |
| Ece1     | 5.77E-67 | -0.957373192 | 0.041 |
| Mest     | 5.84E-67 | -1.038198679 | 0.005 |
| Gmfb     | 6.02E-67 | 0.643854804  | 0.276 |
| Ak3      | 1.38E-66 | 0.574030275  | 0.228 |
| Gjc3     | 1.81E-66 | 0.515938371  | 0.435 |
| Gas5     | 4.20E-66 | 0.540486086  | 0.447 |
| Psmb8    | 6.95E-66 | -0.954113354 | 0.032 |
| Ftl1     | 1.02E-65 | 0.612853182  | 0.547 |
| Plekha1  | 2.38E-65 | 0.528787103  | 0.114 |
| Col1a2   | 2.90E-65 | 0.440598137  | 0.643 |
| Bicd1    | 1.05E-64 | 0.539991874  | 0.147 |
| Prr15    | 1.09E-64 | 0.400601683  | 0.076 |
| Epb4.1l2 | 1.29E-64 | 0.590938948  | 0.315 |
| Kif5b    | 1.29E-64 | 0.60900864   | 0.473 |
| Laptm4a  | 3.06E-64 | -0.553611169 | 0.427 |
| Npdc1    | 3.74E-64 | -0.927509743 | 0.092 |
| Rab2a    | 4.72E-64 | 0.580614378  | 0.339 |
| Baiap2   | 6.79E-64 | 0.491150536  | 0.108 |
| Atp1a1   | 1.26E-63 | 0.594229101  | 0.182 |
| Sptbn1   | 1.60E-63 | -0.61088774  | 0.426 |
| Itm2c    | 1.93E-63 | -0.796093272 | 0.152 |
| Timp3    | 3.78E-63 | -0.419259381 | 0.668 |
| Btg2     | 4.53E-63 | 0.594379886  | 0.097 |
| Mical3   | 7.42E-63 | 0.543025995  | 0.128 |
| Dag1     | 8.80E-63 | 0.549789832  | 0.318 |
| Lgi4     | 8.91E-63 | -0.93993397  | 0.112 |
| Sema3b   | 9.77E-63 | 0.542670337  | 0.579 |
| Enho     | 1.10E-62 | -0.938626831 | 0.008 |
| Ado      | 1.89E-62 | 0.317231673  | 0.073 |
| Hsp90b1  | 2.84E-62 | -0.543181915 | 0.556 |
| Myo9a    | 5.83E-62 | 0.506946868  | 0.121 |
| Rap1gds1 | 6.08E-62 | 0.441128734  | 0.143 |
| Ehd4     | 1.04E-61 | 0.543258537  | 0.131 |
| S100a6   | 1.39E-61 | 0.408434397  | 0.784 |



|         |          |              |       |
|---------|----------|--------------|-------|
| Gpt2    | 1.53E-61 | -1.081093893 | 0.033 |
| Egfl7   | 1.95E-61 | 0.321307854  | 0.06  |
| Bcan    | 2.00E-61 | -0.963452793 | 0.008 |
| Mapk3   | 3.25E-61 | 0.621755595  | 0.289 |
| Mmp14   | 7.51E-61 | -0.896307715 | 0.024 |
| Lurap1  | 2.48E-60 | 0.37511547   | 0.073 |
| Bsg     | 2.52E-60 | -0.650920589 | 0.355 |
| Fam101a | 2.77E-60 | -1.073980197 | 0.008 |
| Tmem2   | 1.11E-59 | 0.325137882  | 0.053 |
| Rnf122  | 1.59E-59 | 0.407127623  | 0.079 |
| Hsd12   | 2.19E-59 | -0.833434295 | 0.099 |
| Calr    | 3.11E-59 | -0.678078801 | 0.333 |
| Kank4   | 5.93E-59 | 0.468148515  | 0.091 |
| Zfp3611 | 6.52E-59 | -0.951578434 | 0.03  |
| Cd63    | 9.26E-59 | -0.498868381 | 0.46  |
| Crebl2  | 1.12E-58 | 0.439457858  | 0.069 |
| Plekhg2 | 1.87E-58 | 0.477025076  | 0.088 |
| Sorbs2  | 3.40E-58 | -1.009909515 | 0.014 |
| Anxa5   | 6.00E-58 | -0.646501381 | 0.353 |
| Calm2   | 8.95E-58 | 0.462338792  | 0.586 |
| Tmsb10  | 9.60E-58 | 0.560600494  | 0.251 |
| Tmem245 | 9.91E-58 | 0.537775476  | 0.129 |
| Clmn    | 1.28E-57 | 0.350347761  | 0.084 |
| Zfp276  | 2.56E-57 | 0.428618776  | 0.086 |
| Gstm5   | 1.48E-56 | -0.907752181 | 0.078 |
| Cotl1   | 1.88E-56 | -0.878743694 | 0.064 |
| L1cam   | 1.96E-56 | -1.07357983  | 0.01  |
| Kcnn4   | 2.57E-56 | -0.830843165 | 0.003 |
| Mxd4    | 3.30E-56 | 0.478896997  | 0.317 |
| Cd151   | 3.79E-56 | 0.53287821   | 0.356 |
| Utp11l  | 4.83E-56 | 0.508240202  | 0.241 |
| Mdk     | 5.51E-56 | -0.847148988 | 0.007 |
| Lgals3  | 3.41E-55 | -1.166797707 | 0.004 |
| Tpd52   | 4.76E-55 | 0.475973312  | 0.151 |
| Fam19a5 | 5.79E-55 | -0.87748619  | 0.033 |
| Gstm1   | 6.36E-55 | -0.873519094 | 0.036 |
| Sdc2    | 6.67E-55 | -0.839027295 | 0.032 |
| Slc4a4  | 9.89E-55 | -0.81295834  | 0.027 |
| Samd8   | 1.05E-54 | 0.455433425  | 0.131 |
| Sox2    | 1.31E-54 | -0.879446916 | 0.019 |
| Tmem50a | 1.39E-54 | 0.385546934  | 0.713 |
| Cpd     | 1.66E-54 | 0.442265356  | 0.112 |
| Sirt2   | 2.38E-54 | 0.545661415  | 0.467 |

|               |          |              |       |
|---------------|----------|--------------|-------|
| Lbh           | 3.08E-54 | -1.043523548 | 0.008 |
| Apod          | 5.26E-54 | 0.770307566  | 0.376 |
| Hey2          | 5.41E-54 | -0.803270812 | 0.008 |
| Gas7          | 1.21E-53 | -0.987732576 | 0.048 |
| Ppib          | 1.27E-53 | -0.632626485 | 0.295 |
| Kcna1         | 1.60E-53 | 0.263187134  | 0.665 |
| Lhfp12        | 1.80E-53 | -0.984514024 | 0.016 |
| Errfi1        | 2.27E-53 | 0.357657119  | 0.067 |
| G0s2          | 2.56E-53 | -1.105570501 | 0.034 |
| Gsta4         | 1.03E-52 | -0.806225296 | 0.02  |
| Slc20a2       | 1.19E-52 | 0.452177274  | 0.083 |
| Psph          | 2.09E-52 | -0.782542393 | 0.068 |
| Col28a1       | 3.32E-52 | -0.752507792 | 0.172 |
| Serpinh1      | 7.04E-52 | -0.645500713 | 0.358 |
| Hspa1b        | 1.07E-51 | 0.379695979  | 0.096 |
| Pdcd6ip       | 1.11E-51 | 0.537838497  | 0.164 |
| Atp1b1        | 1.23E-51 | -0.802375172 | 0.065 |
| Vldlr         | 1.45E-51 | -0.862725967 | 0.032 |
| Ralbp1        | 2.11E-51 | 0.524975914  | 0.326 |
| 0610007N19Rik | 2.63E-51 | 0.497184452  | 0.127 |
| Myh14         | 3.83E-51 | 0.368936568  | 0.072 |
| Gpr155        | 1.48E-50 | 0.334044067  | 0.061 |
| Naaa          | 2.12E-50 | -0.928129334 | 0.014 |
| Dusp26        | 3.36E-50 | 0.501751502  | 0.124 |
| Hid1          | 4.57E-50 | 0.412945045  | 0.091 |
| Adam23        | 4.59E-50 | -1.017242833 | 0.013 |
| Cd47          | 5.56E-50 | 0.499574206  | 0.328 |
| Spg20         | 6.52E-50 | 0.442778228  | 0.14  |
| Ddah2         | 1.16E-49 | -0.808635553 | 0.102 |
| Gpr56         | 1.85E-49 | -0.804601404 | 0.024 |
| Arpc5         | 2.49E-49 | 0.444567315  | 0.457 |
| Cyb5r3        | 2.90E-49 | 0.666670172  | 0.36  |
| Ctnnd2        | 6.42E-49 | -0.7380486   | 0.007 |
| Ppp1r14c      | 8.96E-49 | -0.71415875  | 0.077 |
| Lrrc4c        | 1.01E-48 | -0.807383495 | 0.027 |
| Col23a1       | 1.91E-48 | 0.523271288  | 0.129 |
| Cux1          | 2.39E-48 | 0.492831862  | 0.183 |
| Snx1          | 2.60E-48 | -0.823809492 | 0.073 |
| Lmo1          | 3.61E-48 | 0.495308152  | 0.14  |
| Acot1         | 4.30E-48 | -0.821000574 | 0.035 |
| Rlbp1         | 8.73E-48 | -0.747658853 | 0.004 |
| Tmem38b       | 1.15E-47 | 0.336054965  | 0.066 |
| Sorbs3        | 2.45E-47 | 0.450383881  | 0.114 |

|          |          |              |       |
|----------|----------|--------------|-------|
| Klf2     | 3.12E-47 | 0.402786724  | 0.063 |
| Nefl     | 3.80E-47 | 0.616532754  | 0.293 |
| Slain2   | 3.90E-47 | 0.372800834  | 0.097 |
| Zfand6   | 6.79E-47 | -0.762185926 | 0.139 |
| Sbf2     | 8.49E-47 | 0.464372032  | 0.102 |
| Lims2    | 9.12E-47 | 0.347064257  | 0.091 |
| Laptm4b  | 1.01E-46 | -0.826088576 | 0.078 |
| Actb     | 1.09E-46 | -0.266301804 | 0.856 |
| Capn2    | 1.14E-46 | 0.445531098  | 0.208 |
| Nptn     | 1.51E-46 | 0.517649311  | 0.324 |
| Cab39l   | 3.11E-46 | 0.403760705  | 0.216 |
| Cyp2j6   | 3.61E-46 | -0.70462644  | 0.195 |
| Pik3ip1  | 3.81E-46 | 0.421541634  | 0.217 |
| Fgfr1    | 4.55E-46 | -0.734659633 | 0.042 |
| Casp12   | 6.81E-46 | -0.774060432 | 0.008 |
| Hmgn3    | 7.05E-46 | -0.723310319 | 0.146 |
| Prdx5    | 8.14E-46 | -0.643718993 | 0.179 |
| Pdpm     | 9.78E-46 | -0.664216129 | 0.005 |
| Purb     | 1.04E-45 | 0.487138116  | 0.254 |
| Enpp2    | 1.44E-45 | 0.353396762  | 0.07  |
| Tesk2    | 1.59E-45 | 0.277216575  | 0.062 |
| Csdc2    | 2.10E-45 | -0.715058461 | 0.003 |
| Sncg     | 2.24E-45 | 0.344365562  | 0.729 |
| Polr3h   | 3.48E-45 | -0.786550868 | 0.027 |
| Pttg1ip  | 3.67E-45 | 0.450475111  | 0.34  |
| Sema3c   | 4.39E-45 | -0.912992373 | 0.01  |
| Me1      | 4.57E-45 | -0.751339108 | 0.072 |
| Arl6ip1  | 6.03E-45 | -0.56638165  | 0.336 |
| Smpdl3a  | 6.54E-45 | -0.78213359  | 0.035 |
| Srsf5    | 9.27E-45 | 0.447341484  | 0.295 |
| Pcbp4    | 1.04E-44 | 0.437468495  | 0.294 |
| Col26a1  | 1.14E-44 | 0.233466545  | 0.058 |
| Gulp1    | 1.38E-44 | 0.417604204  | 0.251 |
| Cdc42ep2 | 1.70E-44 | -0.73094811  | 0.025 |
| Cyr61    | 4.73E-44 | 0.570122374  | 0.145 |
| Csnk1g3  | 5.32E-44 | 0.38334441   | 0.089 |
| Tuba1b   | 6.79E-44 | 0.454962499  | 0.498 |
| Slc38a2  | 9.89E-44 | 0.468312766  | 0.159 |
| Zfp280c  | 1.17E-43 | 0.38432007   | 0.061 |
| Rhob     | 1.27E-43 | 0.37243775   | 0.099 |
| Pmm1     | 2.37E-43 | -0.657379648 | 0.099 |
| Cpeb2    | 2.60E-43 | 0.445743405  | 0.082 |
| Ephb6    | 2.92E-43 | 0.452413285  | 0.119 |

|          |          |              |       |
|----------|----------|--------------|-------|
| Spop     | 3.41E-43 | 0.531698945  | 0.303 |
| Cpq      | 5.17E-43 | -0.672130763 | 0.005 |
| Rnd3     | 5.64E-43 | -0.887388672 | 0.017 |
| Zbtb20   | 7.13E-43 | -0.793484578 | 0.124 |
| Ubxn4    | 7.16E-43 | 0.499940931  | 0.369 |
| Mobp     | 1.29E-42 | 0.416178603  | 0.053 |
| Fbxo7    | 2.35E-42 | -0.781881342 | 0.074 |
| Evc2     | 3.23E-42 | 0.327393413  | 0.079 |
| Iah1     | 4.08E-42 | -0.800205259 | 0.084 |
| Manf     | 4.18E-42 | -0.812723844 | 0.096 |
| Crlf3    | 4.98E-42 | 0.414285635  | 0.116 |
| Rtkn     | 5.69E-42 | 0.436152862  | 0.243 |
| Gm2115   | 6.88E-42 | -0.773166438 | 0.004 |
| Pcyt2    | 7.80E-42 | 0.572249782  | 0.226 |
| Edil3    | 9.86E-42 | -0.758307648 | 0.012 |
| Serping1 | 1.77E-41 | -0.852487066 | 0.031 |
| Elovl6   | 1.94E-41 | 0.506261987  | 0.407 |
| Calca    | 4.74E-41 | 0.580231118  | 0.106 |
| Cd81     | 5.72E-41 | -0.409643142 | 0.529 |
| Tead1    | 7.76E-41 | 0.442864207  | 0.137 |
| Rgcc     | 1.37E-40 | -0.594134931 | 0.327 |
| Iqsec1   | 1.61E-40 | 0.451382676  | 0.078 |
| Ldhb     | 3.75E-40 | 0.36552092   | 0.633 |
| Myl6     | 4.56E-40 | 0.500595882  | 0.368 |
| Cltb     | 6.94E-40 | 0.457430755  | 0.326 |
| Cap1     | 7.58E-40 | 0.435487068  | 0.2   |
| Snx10    | 8.93E-40 | -0.77125345  | 0.043 |
| Palld    | 9.58E-40 | -0.742229326 | 0.002 |
| Slc1a5   | 1.51E-39 | -0.673354501 | 0.057 |
| Plce1    | 1.61E-39 | -0.776267829 | 0.018 |
| Bag5     | 1.75E-39 | 0.416487331  | 0.157 |
| Sfxn1    | 2.76E-39 | -0.625659778 | 0.005 |
| Slc25a27 | 3.13E-39 | 0.230224049  | 0.052 |
| Tagln2   | 3.19E-39 | -0.820361221 | 0.088 |
| Cd302    | 4.48E-39 | -0.747742263 | 0.007 |
| Dtd1     | 4.68E-39 | 0.402077369  | 0.107 |
| Epas1    | 5.05E-39 | -0.605934481 | 0.005 |
| Galnt16  | 1.06E-38 | 0.328116133  | 0.078 |
| Tubb2a   | 1.38E-38 | 0.382679528  | 0.173 |
| Dad1     | 1.69E-38 | -0.540593819 | 0.302 |
| Crabp1   | 3.61E-38 | -0.6912871   | 0.002 |
| Dhrs1    | 4.80E-38 | -0.700950642 | 0.1   |
| Cfl2     | 6.05E-38 | 0.417213372  | 0.29  |

|               |          |              |       |
|---------------|----------|--------------|-------|
| Arpc1a        | 9.47E-38 | 0.385907305  | 0.54  |
| Mboat2        | 9.66E-38 | -0.635937981 | 0.151 |
| Cpeb1         | 1.12E-37 | 0.365579161  | 0.078 |
| Iqgap1        | 1.17E-37 | -0.787284008 | 0.05  |
| Vdac2         | 2.42E-37 | 0.457105527  | 0.319 |
| 1110038B12Rik | 4.72E-37 | 0.461422142  | 0.118 |
| Ccdc13        | 5.60E-37 | 0.41646134   | 0.099 |
| Alcam         | 5.75E-37 | -0.806083464 | 0.015 |
| Gpsm2         | 6.08E-37 | -0.719166886 | 0.01  |
| Kctd1         | 8.46E-37 | -0.627998753 | 0.007 |
| Prkcd         | 9.54E-37 | 0.407906153  | 0.109 |
| Crip1         | 2.96E-36 | -0.624444597 | 0.201 |
| C4b           | 3.92E-36 | -0.925920754 | 0.004 |
| Comtd1        | 5.43E-36 | 0.396937268  | 0.08  |
| Hspa5         | 5.82E-36 | -0.560897725 | 0.321 |
| Ctsk          | 6.04E-36 | -0.584751872 | 0.007 |
| mt-Nd5        | 6.43E-36 | -0.425546289 | 0.517 |
| Sfrs18        | 9.01E-36 | 0.415966577  | 0.39  |
| Pim3          | 9.98E-36 | 0.253131599  | 0.057 |
| Wsb2          | 1.02E-35 | 0.376740383  | 0.102 |
| 1810037I17Rik | 1.05E-35 | 0.470336364  | 0.435 |
| Ninj1         | 1.09E-35 | -0.773712547 | 0.02  |
| Gstt1         | 1.18E-35 | -0.658349758 | 0.004 |
| Mmp15         | 1.20E-35 | 0.33660432   | 0.135 |
| Kif21a        | 1.67E-35 | -0.545413718 | 0.219 |
| Cmtm6         | 2.00E-35 | 0.320741831  | 0.099 |
| Tex40         | 2.20E-35 | -0.611484639 | 0.006 |
| Gja1          | 2.88E-35 | -0.534394644 | 0.003 |
| Frmd6         | 3.17E-35 | -0.730372136 | 0.016 |
| Plscr2        | 4.36E-35 | -0.728498489 | 0.024 |
| Fbxo25        | 5.66E-35 | 0.344036579  | 0.096 |
| Fam26e        | 1.14E-34 | 0.208231836  | 0.067 |
| Gpr137b       | 1.28E-34 | 0.437239925  | 0.129 |
| Son           | 1.89E-34 | 0.427009681  | 0.386 |
| Camk2n1       | 2.56E-34 | 0.490581117  | 0.151 |
| Cpne2         | 2.59E-34 | -0.619786494 | 0.003 |
| Sparc         | 2.80E-34 | -0.174930045 | 0.969 |
| Dhrs2         | 2.82E-34 | -0.674254837 | 0.001 |
| Sema6d        | 3.05E-34 | 0.432407674  | 0.091 |
| Cnbp          | 3.58E-34 | -0.498136275 | 0.31  |
| Gap43         | 4.11E-34 | -0.727981525 | 0.048 |
| Psme1         | 4.59E-34 | -0.646798876 | 0.051 |
| Tmem176b      | 5.05E-34 | -0.576577655 | 0.219 |

|           |          |              |       |
|-----------|----------|--------------|-------|
| Rpl3      | 5.63E-34 | 0.439746178  | 0.308 |
| Gm20417   | 6.09E-34 | 0.395746537  | 0.106 |
| Mthfd2l   | 6.82E-34 | 0.308628629  | 0.057 |
| Col16a1   | 1.14E-33 | -0.714870059 | 0.02  |
| S100b     | 1.19E-33 | 0.458409124  | 0.527 |
| Mgat3     | 1.37E-33 | 0.39332183   | 0.116 |
| Tex2      | 1.43E-33 | 0.406973517  | 0.1   |
| Tkt       | 1.94E-33 | 0.44431025   | 0.313 |
| Iqgap2    | 2.57E-33 | -0.976440376 | 0.042 |
| Eci2      | 3.05E-33 | -0.68929932  | 0.087 |
| Prdx2     | 3.21E-33 | -0.520947226 | 0.216 |
| Srpx      | 3.22E-33 | -0.546780404 | 0.004 |
| Caskin2   | 4.01E-33 | 0.401612927  | 0.142 |
| Pdlim7    | 6.14E-33 | 0.383984035  | 0.118 |
| Myo1c     | 6.18E-33 | 0.279544819  | 0.07  |
| Dclk1     | 6.40E-33 | -0.534298969 | 0.011 |
| Snx7      | 7.63E-33 | 0.308959291  | 0.13  |
| Sulf2     | 7.78E-33 | -0.673677695 | 0.002 |
| Car5b     | 8.51E-33 | -0.603123481 | 0.004 |
| Fzd3      | 9.13E-33 | 0.37486177   | 0.079 |
| Kcna6     | 9.73E-33 | -0.7043936   | 0.015 |
| Hist3h2ba | 1.19E-32 | 0.350854794  | 0.052 |
| Ncam2     | 1.51E-32 | -0.626141764 | 0.016 |
| Ctsb      | 2.37E-32 | -0.448297922 | 0.284 |
| Stard5    | 3.00E-32 | 0.262966402  | 0.057 |
| Col4a2    | 3.31E-32 | 0.29187748   | 0.195 |
| Odc1      | 3.79E-32 | 0.343848826  | 0.079 |
| Cpe       | 4.01E-32 | -0.579989092 | 0.288 |
| Rgl1      | 4.28E-32 | -0.613994628 | 0.007 |
| Mgst3     | 5.01E-32 | 0.361306024  | 0.258 |
| Nedd4     | 5.78E-32 | -0.557802626 | 0.171 |
| Gabarapl1 | 5.82E-32 | 0.401112695  | 0.243 |
| Shisa4    | 7.01E-32 | -0.580959408 | 0.061 |
| Bgn       | 8.79E-32 | -0.665506475 | 0.02  |
| Npy       | 1.07E-31 | -0.812669559 | 0.006 |
| Med13l    | 1.15E-31 | 0.37138241   | 0.067 |
| Mgst1     | 1.29E-31 | -0.562267889 | 0.048 |
| Dkk3      | 1.31E-31 | 0.439885607  | 0.117 |
| Nin       | 1.40E-31 | 0.241123512  | 0.052 |
| Zfp36     | 1.42E-31 | 0.355157035  | 0.103 |
| Tgfb2     | 1.46E-31 | -0.663980384 | 0.004 |
| Cox4i1    | 1.77E-31 | -0.305806031 | 0.576 |
| Tbxa2r    | 1.96E-31 | 0.201962404  | 0.056 |

|               |          |              |       |
|---------------|----------|--------------|-------|
| Man1a2        | 2.13E-31 | 0.372423975  | 0.13  |
| Dbnidd2       | 2.23E-31 | -0.549111471 | 0.008 |
| Rnf215        | 2.46E-31 | -0.632161143 | 0.026 |
| Tbc1d10a      | 2.48E-31 | -0.585144468 | 0.009 |
| Cc2d1b        | 3.96E-31 | 0.295617308  | 0.058 |
| Cyfip1        | 4.09E-31 | 0.419989271  | 0.278 |
| Pcdh10        | 5.34E-31 | -0.562109066 | 0.014 |
| Pnn           | 7.71E-31 | 0.414292904  | 0.312 |
| Eva1b         | 7.98E-31 | 0.292122637  | 0.145 |
| Gng11         | 9.83E-31 | -0.620742258 | 0.057 |
| Cyp7b1        | 1.05E-30 | 0.295023812  | 0.072 |
| Ahcy          | 1.20E-30 | 0.346735605  | 0.075 |
| Itgb5         | 1.37E-30 | 0.318603425  | 0.071 |
| D19Erttd737e  | 1.38E-30 | 0.390973784  | 0.146 |
| Cdkn2c        | 1.66E-30 | -0.70493649  | 0.016 |
| Ppp1r9a       | 1.69E-30 | 0.450163949  | 0.201 |
| Flnb          | 1.83E-30 | 0.287839589  | 0.072 |
| Gpr126        | 2.10E-30 | -0.660163281 | 0.077 |
| Pex11a        | 2.29E-30 | -0.525409346 | 0.011 |
| Nr2f2         | 2.31E-30 | -0.566585523 | 0.081 |
| Fads1         | 2.42E-30 | -0.585617879 | 0.162 |
| H1f0          | 2.46E-30 | 0.420722207  | 0.266 |
| Lmna          | 2.75E-30 | 0.372651703  | 0.293 |
| Hspa12a       | 2.99E-30 | 0.36838288   | 0.311 |
| Nefh          | 5.59E-30 | 0.499059238  | 0.14  |
| Dnajb1        | 1.14E-29 | 0.430434709  | 0.112 |
| Las1l         | 1.31E-29 | 0.438991528  | 0.16  |
| App           | 1.44E-29 | -0.361528438 | 0.515 |
| mt-Nd1        | 1.59E-29 | -0.210799277 | 0.832 |
| Plat          | 1.79E-29 | -0.72875721  | 0.014 |
| Unc119b       | 1.86E-29 | 0.3087725    | 0.101 |
| Lpin1         | 2.21E-29 | 0.285921189  | 0.056 |
| Col1a1        | 3.31E-29 | 0.264872782  | 0.1   |
| Lmo4          | 3.40E-29 | -0.616047294 | 0.115 |
| Hmgcr         | 3.44E-29 | 0.522829619  | 0.223 |
| B230354K17Rik | 3.89E-29 | 0.306296122  | 0.062 |
| Pdia3         | 4.06E-29 | -0.528957898 | 0.238 |
| Clk1          | 4.40E-29 | 0.379228525  | 0.165 |
| Gstk1         | 4.59E-29 | -0.575081534 | 0.083 |
| Syt1          | 4.91E-29 | -0.753770147 | 0.013 |
| Cxxc5         | 5.54E-29 | 0.270225024  | 0.165 |
| 2310022B05Rik | 6.68E-29 | -0.596440781 | 0.085 |
| Cd44          | 6.93E-29 | -0.60434097  | 0.005 |

|          |          |              |       |
|----------|----------|--------------|-------|
| Kif3c    | 1.24E-28 | 0.270836571  | 0.063 |
| Tceal3   | 1.27E-28 | -0.520444545 | 0.009 |
| Rhobtb3  | 1.36E-28 | 0.365702936  | 0.222 |
| Cdh19    | 1.44E-28 | -0.770233205 | 0.017 |
| Mvb12b   | 1.47E-28 | 0.314094232  | 0.122 |
| Mapt     | 1.56E-28 | -0.650160906 | 0.042 |
| Cdh2     | 2.23E-28 | -0.648603172 | 0.016 |
| Acyp2    | 2.33E-28 | -0.637350964 | 0.087 |
| Cnppd1   | 2.84E-28 | 0.291138908  | 0.112 |
| Dnajc17  | 4.58E-28 | 0.255759442  | 0.054 |
| Zfp191   | 4.62E-28 | -0.54103679  | 0.066 |
| Mxra8    | 4.64E-28 | -0.618455916 | 0.069 |
| Notch1   | 8.63E-28 | -0.6291216   | 0.017 |
| Alpl     | 9.13E-28 | -0.43646868  | 0.004 |
| Gfra2    | 1.11E-27 | -0.581295754 | 0.005 |
| Psme2    | 1.12E-27 | -0.476365316 | 0.098 |
| Cplx2    | 1.16E-27 | -0.622592509 | 0.026 |
| Rab31    | 1.28E-27 | -0.589969674 | 0.028 |
| Tnc      | 1.55E-27 | -0.635978808 | 0     |
| Zcchc7   | 1.56E-27 | 0.369313902  | 0.098 |
| Megf9    | 1.92E-27 | 0.30673264   | 0.299 |
| Trim13   | 2.08E-27 | 0.260371215  | 0.087 |
| Papss1   | 2.47E-27 | 0.347542148  | 0.257 |
| Psmb2    | 2.98E-27 | -0.491324    | 0.207 |
| Cacng4   | 3.29E-27 | -0.440818896 | 0.001 |
| P2ry12   | 3.94E-27 | -0.577980453 | 0.007 |
| Rsph9    | 4.87E-27 | -0.538006429 | 0.037 |
| Xist     | 4.99E-27 | 0.445556955  | 0.18  |
| Abhd4    | 5.14E-27 | -0.553611852 | 0.188 |
| Tacc1    | 5.99E-27 | 0.304762534  | 0.208 |
| Prrg4    | 1.18E-26 | 0.275136351  | 0.063 |
| Sdcbp    | 1.53E-26 | -0.526089722 | 0.078 |
| Cnpy2    | 1.58E-26 | -0.576917575 | 0.116 |
| Lgr5     | 1.76E-26 | -0.454083002 | 0.002 |
| Sipa1l1  | 1.76E-26 | 0.272436085  | 0.07  |
| Socs3    | 1.99E-26 | 0.213004088  | 0.072 |
| Dnajc7   | 2.04E-26 | 0.403873215  | 0.208 |
| Th       | 2.05E-26 | -0.663167118 | 0.007 |
| Sh3pxd2b | 2.13E-26 | -0.514421183 | 0.013 |
| Tjp1     | 2.52E-26 | 0.383988033  | 0.083 |
| Prkcdbp  | 2.59E-26 | 0.332003921  | 0.398 |
| Cd24a    | 2.70E-26 | 0.313402206  | 0.121 |
| Fads2    | 2.92E-26 | -0.505869938 | 0.013 |



|               |          |              |       |
|---------------|----------|--------------|-------|
| Col11a1       | 3.17E-26 | -0.536823476 | 0.005 |
| Palmd         | 3.19E-26 | 0.233296176  | 0.069 |
| Gal3st1       | 3.20E-26 | 0.286581505  | 0.142 |
| Angpt2        | 3.73E-26 | -0.556968071 | 0.049 |
| Rnf13         | 3.88E-26 | 0.332385856  | 0.323 |
| Asrgl1        | 4.70E-26 | -0.519061606 | 0.151 |
| Dock10        | 4.99E-26 | 0.312449532  | 0.061 |
| Nudt4         | 5.07E-26 | -0.595928176 | 0.052 |
| Vmp1          | 6.71E-26 | 0.295212412  | 0.116 |
| Rabgef1       | 7.25E-26 | 0.243714766  | 0.063 |
| Zfp467        | 8.28E-26 | -0.526502165 | 0.012 |
| Mtus1         | 9.07E-26 | 0.202294305  | 0.059 |
| Myl12a        | 9.51E-26 | -0.472890279 | 0.276 |
| E130114P18Rik | 1.02E-25 | -0.466827103 | 0.004 |
| Klhl13        | 1.03E-25 | -0.428547581 | 0.013 |
| Srrm2         | 1.08E-25 | 0.353904116  | 0.362 |
| Wwc2          | 1.60E-25 | 0.357381368  | 0.088 |
| Tln2          | 2.06E-25 | -0.559208562 | 0.048 |
| Rhpn1         | 2.13E-25 | 0.385437089  | 0.061 |
| Gpn3          | 2.99E-25 | 0.299649867  | 0.112 |
| Crym          | 3.07E-25 | -0.501137513 | 0.008 |
| Pomgnt1       | 3.11E-25 | 0.25194247   | 0.054 |
| Zdhhc2        | 3.67E-25 | -0.475001353 | 0.03  |
| Tmem30a       | 6.31E-25 | 0.330258027  | 0.292 |
| Mdh1          | 6.47E-25 | -0.430989654 | 0.223 |
| Shisa5        | 6.62E-25 | -0.548998862 | 0.033 |
| Fam171b       | 6.90E-25 | -0.414848187 | 0.009 |
| Eepd1         | 8.01E-25 | -0.376155203 | 0.011 |
| Tmbim1        | 8.40E-25 | 0.312315606  | 0.231 |
| Ddc           | 9.79E-25 | -0.678049731 | 0.002 |
| Fermt2        | 1.03E-24 | -0.428118215 | 0.286 |
| Mat2a         | 1.13E-24 | 0.336080555  | 0.345 |
| Wls           | 1.19E-24 | -0.519386501 | 0.029 |
| Psmb10        | 1.21E-24 | -0.604249171 | 0.079 |
| Luzp2         | 1.45E-24 | -0.488514468 | 0.007 |
| Srgap2        | 1.48E-24 | 0.295712956  | 0.069 |
| Nr2f1         | 1.80E-24 | -0.6180821   | 0.054 |
| Ogt           | 1.89E-24 | 0.300915002  | 0.113 |
| Dusp6         | 2.06E-24 | -0.588748662 | 0.026 |
| Meg3          | 2.13E-24 | -0.621252248 | 0.061 |
| Ccdc85b       | 2.52E-24 | 0.296298979  | 0.127 |
| Gls           | 2.63E-24 | 0.276554223  | 0.095 |
| Gbp7          | 2.81E-24 | -0.621023229 | 0.03  |

|               |          |              |       |
|---------------|----------|--------------|-------|
| Dnb1          | 2.83E-24 | 0.261418941  | 0.07  |
| Ubl3          | 4.10E-24 | 0.319560635  | 0.218 |
| Srebf1        | 4.50E-24 | -0.54183526  | 0.076 |
| Phlda3        | 5.67E-24 | 0.308535686  | 0.115 |
| Fkbp2         | 6.00E-24 | -0.392701308 | 0.23  |
| Slc6a2        | 6.65E-24 | -0.634308701 | 0.003 |
| Lamb1         | 8.42E-24 | 0.310156363  | 0.345 |
| Daam2         | 8.80E-24 | -0.523918411 | 0.021 |
| Nae1          | 1.00E-23 | 0.316418728  | 0.125 |
| Msi2          | 1.12E-23 | -0.485603169 | 0.017 |
| Ssh1          | 1.27E-23 | 0.291397981  | 0.06  |
| 2810008D09Rik | 1.27E-23 | 0.332915515  | 0.165 |
| Acadl         | 1.33E-23 | -0.479613386 | 0.144 |
| Fkbp1a        | 1.34E-23 | 0.304839808  | 0.486 |
| H2-T22        | 1.49E-23 | -0.564751891 | 0.012 |
| Sema3e        | 1.62E-23 | -0.580598774 | 0.001 |
| Itfg3         | 1.62E-23 | 0.330844289  | 0.128 |
| Hand2         | 1.91E-23 | -0.573568992 | 0.001 |
| Pcdhga9       | 1.92E-23 | -0.537972413 | 0.082 |
| Itgb4         | 1.97E-23 | 0.19584115   | 0.11  |
| Ypel3         | 2.06E-23 | 0.302424516  | 0.339 |
| Sh3pxd2a      | 2.10E-23 | -0.617837291 | 0.033 |
| Bnip3l        | 2.37E-23 | 0.411129832  | 0.216 |
| Nrarp         | 3.59E-23 | -0.402932625 | 0.01  |
| Cdo1          | 3.92E-23 | -0.338780379 | 0.004 |
| Pla2g7        | 3.97E-23 | 0.390740313  | 0.085 |
| Puf60         | 4.07E-23 | 0.350257336  | 0.27  |
| Dot1l         | 4.25E-23 | 0.282789069  | 0.068 |
| Mt1           | 4.84E-23 | 0.320671457  | 0.587 |
| Cntln         | 4.91E-23 | 0.358356225  | 0.102 |
| Hmgcs1        | 4.96E-23 | 0.340340711  | 0.539 |
| Sh3kbp1       | 5.59E-23 | -0.500875506 | 0.044 |
| Lap3          | 5.62E-23 | 0.286595211  | 0.108 |
| Dab2ip        | 6.91E-23 | 0.246801384  | 0.06  |
| Ndufa13       | 7.22E-23 | 0.326933401  | 0.467 |
| Axl           | 7.49E-23 | -0.44510708  | 0.004 |
| Dbh           | 8.03E-23 | -0.594297901 | 0.004 |
| Tcf4          | 1.02E-22 | -0.572158989 | 0.027 |
| Cyp2d22       | 1.02E-22 | -0.535809622 | 0.008 |
| Phldb1        | 1.23E-22 | 0.284794513  | 0.085 |
| Ncald         | 1.48E-22 | -0.568172597 | 0.033 |
| Ttc14         | 1.61E-22 | 0.302650126  | 0.135 |
| Nme1          | 1.69E-22 | -0.502541023 | 0.108 |

|               |          |              |       |
|---------------|----------|--------------|-------|
| Uqcc2         | 1.85E-22 | -0.50222415  | 0.155 |
| Megf10        | 2.03E-22 | -0.453305925 | 0.01  |
| Slc6a8        | 2.12E-22 | 0.291471869  | 0.068 |
| Satb1         | 2.18E-22 | 0.225044597  | 0.068 |
| Vcam1         | 2.22E-22 | -0.514818936 | 0     |
| Fads6         | 2.24E-22 | -0.495827691 | 0.037 |
| Cnn2          | 2.38E-22 | -0.579039146 | 0.04  |
| Wbscr16       | 2.39E-22 | 0.253575727  | 0.06  |
| Vcl           | 2.57E-22 | -0.629040253 | 0.039 |
| Nid2          | 2.84E-22 | -0.677114656 | 0.047 |
| Atp6v0e       | 2.92E-22 | -0.474963367 | 0.197 |
| Gbp2          | 2.96E-22 | -0.615346632 | 0.018 |
| Tmem176a      | 3.41E-22 | -0.470349915 | 0.194 |
| S100a1        | 4.12E-22 | -0.432893767 | 0.158 |
| Gpx8          | 4.17E-22 | -0.48679088  | 0.125 |
| Itgb3         | 5.04E-22 | -0.450866707 | 0.001 |
| Mbnl1         | 5.68E-22 | 0.262401443  | 0.127 |
| Oaf           | 6.05E-22 | -0.61902564  | 0.059 |
| Tap2          | 7.88E-22 | -0.435015351 | 0.015 |
| Ndnf          | 9.59E-22 | -0.458040114 | 0.001 |
| Aqp4          | 1.14E-21 | -0.38908553  | 0.002 |
| Epdr1         | 1.21E-21 | 0.363804171  | 0.249 |
| Trib1         | 1.30E-21 | -0.37851256  | 0.003 |
| Itpr3         | 1.59E-21 | 0.366945922  | 0.151 |
| Srrm1         | 1.76E-21 | 0.257500183  | 0.272 |
| Gbp3          | 1.80E-21 | -0.598640038 | 0.022 |
| Tmem140       | 1.87E-21 | -0.598873325 | 0.03  |
| 1110007C09Rik | 1.87E-21 | 0.352605493  | 0.135 |
| Serinc1       | 1.88E-21 | 0.28732267   | 0.454 |
| Parp14        | 2.01E-21 | -0.515756173 | 0.006 |
| Fuca1         | 2.08E-21 | -0.519774718 | 0.099 |
| Gskip         | 2.19E-21 | 0.257355826  | 0.084 |
| Sdf2          | 2.37E-21 | -0.52553396  | 0.087 |
| Jam2          | 2.59E-21 | -0.349736414 | 0.014 |
| Ctso          | 2.60E-21 | -0.453113617 | 0.031 |
| Shpk          | 2.98E-21 | -0.665169226 | 0.082 |
| Ifit3         | 3.08E-21 | -0.803621684 | 0.019 |
| Nacc2         | 3.78E-21 | 0.273480748  | 0.135 |
| Suclg2        | 3.96E-21 | -0.420423686 | 0.006 |
| Map7d1        | 4.10E-21 | 0.266840955  | 0.197 |
| 1810058I24Rik | 4.45E-21 | 0.30308801   | 0.232 |
| Med22         | 4.53E-21 | 0.27646972   | 0.059 |
| Rab3b         | 4.61E-21 | -0.529888896 | 0.004 |

|          |          |              |       |
|----------|----------|--------------|-------|
| Gfra3    | 6.34E-21 | -0.617423489 | 0.001 |
| Klhl5    | 7.26E-21 | -0.539001172 | 0.028 |
| Rab9     | 7.34E-21 | -0.482101847 | 0.078 |
| Bcl2l2   | 9.89E-21 | 0.213868357  | 0.059 |
| Ctsa     | 1.53E-20 | 0.349151397  | 0.189 |
| Ip6k2    | 1.53E-20 | 0.268763165  | 0.071 |
| Prdx4    | 1.56E-20 | -0.462656529 | 0.092 |
| Ndufc2   | 1.58E-20 | -0.352693252 | 0.188 |
| Fbxl5    | 1.81E-20 | 0.31227394   | 0.103 |
| Rab13    | 2.11E-20 | -0.428332587 | 0.022 |
| Ptk2     | 2.42E-20 | -0.568248984 | 0.028 |
| Epn1     | 2.59E-20 | 0.242478037  | 0.078 |
| Arhgap31 | 2.66E-20 | 0.289018407  | 0.062 |
| Matn4    | 2.93E-20 | -0.478150637 | 0.021 |
| Mfsd2a   | 3.36E-20 | 0.405675166  | 0.131 |
| Bst2     | 3.46E-20 | -0.463114276 | 0.078 |
| Slc25a4  | 3.62E-20 | -0.294890739 | 0.508 |
| Acat1    | 3.69E-20 | -0.463178884 | 0.097 |
| Emp1     | 4.22E-20 | -0.603293442 | 0.002 |
| Mettl7a1 | 4.34E-20 | -0.511086706 | 0.007 |
| Pcdh9    | 5.03E-20 | 0.302150143  | 0.103 |
| Tbc1d23  | 5.11E-20 | 0.245464642  | 0.066 |
| Fnta     | 5.14E-20 | -0.410061361 | 0.28  |
| Rasa2    | 5.40E-20 | -0.475143454 | 0.041 |
| Nrn1     | 5.60E-20 | -0.683041397 | 0.037 |
| Cd200    | 6.71E-20 | -0.473150795 | 0.15  |
| Mbnl2    | 7.28E-20 | 0.195593204  | 0.307 |
| Ptgfrn   | 7.32E-20 | -0.363121633 | 0.002 |
| Tmem47   | 8.14E-20 | -0.477270418 | 0.085 |
| Wasf2    | 8.35E-20 | 0.30738044   | 0.18  |
| Man1b1   | 8.38E-20 | 0.224609518  | 0.06  |
| Slc1a4   | 8.39E-20 | -0.314708605 | 0.004 |
| Ifi35    | 8.58E-20 | -0.468294261 | 0.036 |
| Rbms3    | 9.74E-20 | -0.527908283 | 0.035 |
| Cep104   | 1.03E-19 | 0.1947482    | 0.057 |
| Eif1b    | 1.21E-19 | -0.463721347 | 0.158 |
| Haus8    | 1.22E-19 | 0.226053318  | 0.077 |
| Nudt3    | 1.24E-19 | 0.338794104  | 0.195 |
| Htra2    | 1.31E-19 | 0.248181603  | 0.077 |
| Ophn1    | 1.44E-19 | 0.296293714  | 0.084 |
| Suco     | 1.51E-19 | 0.257582672  | 0.085 |
| Ndn      | 1.57E-19 | -0.509766515 | 0.052 |
| Lepre1   | 1.65E-19 | 0.225644199  | 0.059 |

|               |          |              |       |
|---------------|----------|--------------|-------|
| Lix1          | 1.76E-19 | -0.376207608 | 0.033 |
| Rps5          | 1.77E-19 | -0.321316757 | 0.505 |
| 0610009D07Rik | 1.86E-19 | -0.460743453 | 0.093 |
| Gdi1          | 1.92E-19 | 0.264025653  | 0.178 |
| Cct5          | 2.00E-19 | 0.250442959  | 0.241 |
| Col27a1       | 2.48E-19 | -0.551680694 | 0.009 |
| Kcnh2         | 2.53E-19 | -0.40762688  | 0.007 |
| Ctnna1        | 2.69E-19 | -0.396097792 | 0.321 |
| Mical1        | 3.06E-19 | 0.401481629  | 0.096 |
| Lgr4          | 3.13E-19 | -0.471670859 | 0.033 |
| Snn           | 3.33E-19 | 0.277221658  | 0.082 |
| Coprs         | 3.67E-19 | 0.281307559  | 0.093 |
| Ptms          | 4.01E-19 | 0.332308951  | 0.363 |
| H2-Q4         | 4.03E-19 | -0.471216646 | 0.008 |
| Them4         | 4.17E-19 | 0.246163585  | 0.081 |
| Tlcd1         | 4.73E-19 | -0.438807513 | 0.032 |
| Jun           | 5.04E-19 | 0.457013356  | 0.29  |
| Idh1          | 5.61E-19 | -0.477624784 | 0.065 |
| Tmf1          | 5.81E-19 | 0.238372406  | 0.09  |
| Fus           | 6.59E-19 | 0.298393037  | 0.298 |
| Ngfrap1       | 6.65E-19 | -0.471594669 | 0.071 |
| Zcchc18       | 6.97E-19 | -0.492004633 | 0.023 |
| Pdia4         | 7.07E-19 | -0.525746919 | 0.119 |
| Csgalnact1    | 7.22E-19 | 0.305466977  | 0.072 |
| Gm13111       | 7.65E-19 | -0.533982481 | 0.032 |
| D730003I15Rik | 7.70E-19 | 0.213661226  | 0.053 |
| Pnmal2        | 8.78E-19 | -0.405291855 | 0.016 |
| Hoxb3os       | 8.97E-19 | 0.276485546  | 0.096 |
| Pabpc1        | 9.09E-19 | 0.282599397  | 0.531 |
| Plekhj1       | 9.27E-19 | 0.295875071  | 0.101 |
| Ampd3         | 1.26E-18 | -0.379324694 | 0.004 |
| Myo6          | 1.32E-18 | 0.390077051  | 0.114 |
| Rilpl1        | 1.64E-18 | 0.267517006  | 0.091 |
| Igfbp5        | 1.69E-18 | 0.494635615  | 0.109 |
| Adprh         | 1.72E-18 | -0.460716397 | 0.131 |
| Ifit1         | 1.83E-18 | -0.715001061 | 0.007 |
| Fam212a       | 1.89E-18 | -0.453761031 | 0.035 |
| Zcwpw1        | 1.90E-18 | 0.226089711  | 0.053 |
| Tmed10        | 2.01E-18 | 0.308558974  | 0.427 |
| Hes1          | 2.08E-18 | -0.518564052 | 0.035 |
| B230219D22Rik | 2.13E-18 | 0.326711618  | 0.179 |
| Morf4l2       | 2.23E-18 | -0.499778999 | 0.084 |
| Pink1         | 2.48E-18 | 0.336865771  | 0.263 |

|               |          |              |       |
|---------------|----------|--------------|-------|
| Pon2          | 2.49E-18 | -0.389560438 | 0.066 |
| Cib1          | 2.65E-18 | -0.448504095 | 0.055 |
| Sec11a        | 2.87E-18 | -0.453763946 | 0.076 |
| Nktr          | 3.13E-18 | 0.365218543  | 0.151 |
| Ifngr1        | 3.45E-18 | -0.45809311  | 0.047 |
| Tmem205       | 3.47E-18 | -0.500881731 | 0.114 |
| Cadm4         | 4.01E-18 | 0.277060873  | 0.223 |
| Sorbs1        | 4.37E-18 | -0.41942586  | 0.207 |
| Loh12cr1      | 5.07E-18 | 0.272547782  | 0.066 |
| Ostc          | 5.44E-18 | -0.454409954 | 0.127 |
| Fxyd2         | 6.57E-18 | 0.363563213  | 0.193 |
| Psmb9         | 6.60E-18 | -0.468884123 | 0.02  |
| H2-T23        | 6.65E-18 | -0.417010197 | 0.016 |
| Plec          | 6.66E-18 | 0.273146637  | 0.118 |
| Eif3i         | 7.49E-18 | -0.445742082 | 0.133 |
| Fkbp10        | 7.76E-18 | -0.409190266 | 0.011 |
| 2810428I15Rik | 8.49E-18 | -0.406533056 | 0.162 |
| Mtmr2         | 8.80E-18 | 0.216894188  | 0.081 |
| Rab10         | 9.56E-18 | -0.414787982 | 0.16  |
| Lgals3bp      | 1.04E-17 | -0.419534481 | 0.005 |
| Rasa3         | 1.24E-17 | -0.44806509  | 0.033 |
| Fah           | 1.24E-17 | -0.395228416 | 0.008 |
| 1700025G04Rik | 1.24E-17 | -0.48979596  | 0.031 |
| Sep15         | 1.26E-17 | -0.341819277 | 0.379 |
| Arf4          | 1.26E-17 | -0.456961916 | 0.115 |
| Ldlrad3       | 1.36E-17 | 0.238574699  | 0.053 |
| Gna12         | 1.41E-17 | 0.235850574  | 0.068 |
| Yif1b         | 1.48E-17 | 0.258915409  | 0.148 |
| Acaa2         | 1.54E-17 | -0.412799652 | 0.145 |
| Gabarapl2     | 1.54E-17 | 0.338678907  | 0.183 |
| Cope          | 1.55E-17 | -0.422928899 | 0.157 |
| Amotl2        | 1.58E-17 | 0.222863658  | 0.085 |
| Nab2          | 1.64E-17 | 0.29907503   | 0.065 |
| Kcnk5         | 1.66E-17 | 0.22931203   | 0.052 |
| Abcg1         | 1.74E-17 | 0.305679159  | 0.093 |
| Soat1         | 1.78E-17 | -0.315703997 | 0.008 |
| Tmem229a      | 2.16E-17 | 0.35689577   | 0.139 |
| Glul          | 2.19E-17 | 0.339235243  | 0.267 |
| Mesdc2        | 2.36E-17 | -0.455873799 | 0.088 |
| Sorcs1        | 2.52E-17 | 0.299348939  | 0.186 |
| Scd2          | 2.62E-17 | -0.204863819 | 0.757 |
| Hist1h2bc     | 2.62E-17 | -0.321108014 | 0.29  |
| Nfkbib        | 3.16E-17 | 0.176970011  | 0.096 |

|               |          |              |       |
|---------------|----------|--------------|-------|
| Nek6          | 3.36E-17 | -0.451197315 | 0.026 |
| Akap12        | 3.65E-17 | 0.601893043  | 0.236 |
| Spcs2         | 3.70E-17 | -0.435077597 | 0.253 |
| Map2k7        | 3.77E-17 | 0.242471315  | 0.068 |
| Cd59a         | 4.39E-17 | -0.344600495 | 0.591 |
| Mcur1         | 4.53E-17 | 0.232432447  | 0.096 |
| Serf1         | 5.19E-17 | 0.193485122  | 0.105 |
| Snx16         | 5.35E-17 | 0.27772154   | 0.116 |
| Cdh1          | 5.83E-17 | 0.379506373  | 0.099 |
| Cox17         | 6.30E-17 | 0.274021315  | 0.183 |
| Micu1         | 6.43E-17 | 0.211190706  | 0.079 |
| Lasp1         | 6.63E-17 | -0.404329796 | 0.023 |
| Nrp1          | 6.71E-17 | -0.50085212  | 0.026 |
| Tm7sf2        | 6.96E-17 | -0.413845147 | 0.061 |
| Sepw1         | 7.26E-17 | -0.442492767 | 0.128 |
| Hspg2         | 7.26E-17 | 0.231782491  | 0.142 |
| Rnpepl1       | 8.32E-17 | 0.206804093  | 0.069 |
| Lgmn          | 1.11E-16 | -0.443769152 | 0.04  |
| Lsm6          | 1.15E-16 | -0.371753682 | 0.024 |
| Rmnd5a        | 1.18E-16 | 0.24759362   | 0.053 |
| Sdf2l1        | 1.20E-16 | -0.438694676 | 0.008 |
| Cstf3         | 1.23E-16 | 0.303637159  | 0.066 |
| Cox14         | 1.27E-16 | -0.402733504 | 0.186 |
| Ier5          | 1.41E-16 | 0.173144113  | 0.057 |
| Pgf           | 1.51E-16 | -0.271701046 | 0.007 |
| Ggh           | 1.63E-16 | -0.469361592 | 0.072 |
| Ccdc101       | 1.71E-16 | 0.233837021  | 0.066 |
| Stard8        | 1.93E-16 | 0.241936204  | 0.078 |
| Arl1          | 2.00E-16 | 0.264734025  | 0.204 |
| Efemp2        | 2.07E-16 | -0.387640521 | 0.024 |
| Mapk8ip3      | 2.25E-16 | 0.22457411   | 0.065 |
| Plxnb1        | 2.31E-16 | 0.199251117  | 0.052 |
| Gltf          | 2.49E-16 | 0.221579068  | 0.154 |
| Ppp3ca        | 2.63E-16 | 0.289991689  | 0.185 |
| Map3k11       | 2.85E-16 | 0.23617735   | 0.071 |
| Rpl8          | 3.10E-16 | -0.250630201 | 0.514 |
| 1110012L19Rik | 3.50E-16 | 0.149087088  | 0.09  |
| Tspan6        | 3.50E-16 | -0.410061702 | 0.022 |
| Rapgef6       | 3.53E-16 | 0.257785988  | 0.069 |
| Rnf141        | 3.69E-16 | 0.207547444  | 0.06  |
| Xiap          | 3.81E-16 | 0.213117263  | 0.098 |
| Arid5b        | 4.14E-16 | 0.267677729  | 0.069 |
| Lrpap1        | 4.17E-16 | -0.392388207 | 0.083 |

|         |          |              |       |
|---------|----------|--------------|-------|
| Rnpc3   | 4.18E-16 | 0.327098247  | 0.09  |
| Mien1   | 4.41E-16 | -0.437387142 | 0.109 |
| Nbl1    | 4.52E-16 | 0.185147284  | 0.084 |
| Crot    | 4.63E-16 | -0.3811458   | 0.044 |
| St3gal4 | 4.74E-16 | -0.286139116 | 0.011 |
| Hsd17b7 | 4.86E-16 | 0.290978663  | 0.11  |
| Clic1   | 5.13E-16 | -0.440739218 | 0.09  |
| Myo10   | 5.46E-16 | -0.337286452 | 0.056 |
| Ptptra  | 5.73E-16 | -0.423695635 | 0.08  |
| Gm27031 | 5.90E-16 | -0.382240242 | 0.009 |
| Sf3b5   | 6.11E-16 | -0.42869318  | 0.097 |
| Vstm4   | 6.49E-16 | -0.412672531 | 0.009 |
| Cadm2   | 6.52E-16 | -0.565159518 | 0.008 |
| Sfswap  | 6.62E-16 | 0.338799072  | 0.112 |
| Csnk2a1 | 7.51E-16 | 0.250392702  | 0.126 |
| Sypl    | 8.15E-16 | 0.230750675  | 0.195 |
| Syt11   | 8.32E-16 | -0.330873801 | 0.3   |
| Kctd10  | 8.94E-16 | 0.134817807  | 0.06  |
| Polr2m  | 9.18E-16 | -0.433118416 | 0.048 |
| Dlgap1  | 9.37E-16 | -0.413762857 | 0.049 |
| Stat6   | 9.46E-16 | 0.205146079  | 0.066 |
| Slc35b2 | 1.08E-15 | -0.387700031 | 0.076 |
| Itgb1   | 1.10E-15 | 0.24419791   | 0.377 |
| Rtp4    | 1.20E-15 | -0.454667017 | 0.013 |
| Cib2    | 1.21E-15 | -0.351002121 | 0.008 |
| Lgalsl  | 1.28E-15 | -0.444903404 | 0.033 |
| Pebp1   | 1.39E-15 | 0.250312802  | 0.402 |
| Tsc22d3 | 1.47E-15 | 0.304058733  | 0.194 |
| Mpv17l2 | 1.68E-15 | 0.294700278  | 0.082 |
| Ubn2    | 1.77E-15 | 0.250716556  | 0.074 |
| Pigyl   | 1.81E-15 | -0.425796135 | 0.052 |
| Rplp0   | 1.89E-15 | 0.210476082  | 0.657 |
| Ddx5    | 1.95E-15 | 0.200059792  | 0.467 |
| Fkbp7   | 2.16E-15 | -0.501876237 | 0.035 |
| Ggct    | 2.16E-15 | 0.186900081  | 0.095 |
| Metrn   | 2.28E-15 | -0.363534572 | 0.088 |
| Psat1   | 2.52E-15 | -0.4893241   | 0.087 |
| Vat1    | 3.31E-15 | 0.220024454  | 0.063 |
| Gnb2    | 3.37E-15 | -0.35669496  | 0.244 |
| Anp32a  | 3.37E-15 | -0.368054596 | 0.188 |
| Cbx6    | 3.66E-15 | 0.168666585  | 0.084 |
| Apc     | 3.80E-15 | 0.316952671  | 0.112 |
| Ppp2r4  | 3.82E-15 | 0.199380486  | 0.124 |



|           |          |              |       |
|-----------|----------|--------------|-------|
| Cers4     | 3.85E-15 | 0.262456328  | 0.142 |
| Aig1      | 5.56E-15 | -0.338850868 | 0.067 |
| Hjurp     | 5.69E-15 | 0.197437231  | 0.058 |
| Tmem107   | 6.48E-15 | -0.385709187 | 0.017 |
| Dhrs4     | 6.62E-15 | -0.390469328 | 0.028 |
| Tcf7l2    | 7.30E-15 | 0.247309617  | 0.063 |
| Dnajc3    | 7.33E-15 | -0.429760915 | 0.172 |
| Galc      | 7.67E-15 | 0.201448439  | 0.068 |
| Plscr4    | 9.07E-15 | -0.463281055 | 0.045 |
| Rnf130    | 1.02E-14 | 0.265357384  | 0.232 |
| Fstl3     | 1.07E-14 | 0.230901455  | 0.09  |
| Rpn2      | 1.17E-14 | -0.361829217 | 0.114 |
| Aldh2     | 1.20E-14 | -0.336105829 | 0.18  |
| Tmem208   | 1.21E-14 | -0.402453502 | 0.09  |
| Mcam      | 1.22E-14 | -0.518775707 | 0.05  |
| Itch      | 1.27E-14 | 0.211081798  | 0.069 |
| Pcp4      | 1.28E-14 | 0.348085237  | 0.064 |
| Slitrk2   | 1.38E-14 | -0.319693462 | 0.009 |
| Irgm1     | 1.49E-14 | -0.48768396  | 0.015 |
| Pdia6     | 1.79E-14 | -0.438531226 | 0.173 |
| Itgb3bp   | 2.13E-14 | 0.291635247  | 0.079 |
| Tmem33    | 2.20E-14 | -0.421805844 | 0.115 |
| Gm16133   | 2.55E-14 | -0.292014023 | 0.019 |
| Slc31a2   | 2.55E-14 | -0.533492192 | 0.062 |
| Sox4      | 2.61E-14 | -0.322985092 | 0.054 |
| Akap9     | 2.61E-14 | 0.230170459  | 0.17  |
| Igtp      | 3.03E-14 | -0.519342381 | 0.016 |
| Ctnnbp2nl | 3.25E-14 | -0.456467095 | 0.079 |
| Sbno1     | 3.43E-14 | 0.182356839  | 0.116 |
| Ap2m1     | 3.73E-14 | 0.249226679  | 0.136 |
| Caprin1   | 3.77E-14 | 0.292445193  | 0.145 |
| Glo1      | 3.79E-14 | -0.37620697  | 0.093 |
| Serpine2  | 3.95E-14 | -0.3512753   | 0.343 |
| Wwp2      | 4.11E-14 | 0.231710135  | 0.056 |
| Mageh1    | 4.22E-14 | -0.429262207 | 0.06  |
| Vamp8     | 4.36E-14 | 0.253408134  | 0.275 |
| Ddx17     | 4.51E-14 | 0.27049717   | 0.16  |
| Slc25a3   | 4.76E-14 | -0.345091423 | 0.262 |
| Pcmt1d1   | 4.83E-14 | 0.251447484  | 0.148 |
| Pdap1     | 4.96E-14 | 0.297025374  | 0.279 |
| Ndufv3    | 5.19E-14 | -0.371201225 | 0.122 |
| Tmem64    | 5.60E-14 | -0.386226004 | 0.031 |
| Cyp39a1   | 6.60E-14 | 0.279841173  | 0.109 |

|             |          |              |       |
|-------------|----------|--------------|-------|
| Bnip3       | 7.91E-14 | 0.182491183  | 0.082 |
| Plod1       | 8.89E-14 | 0.177898838  | 0.093 |
| Faim        | 9.06E-14 | 0.225852718  | 0.118 |
| Sept7       | 9.74E-14 | -0.280499445 | 0.366 |
| Fam49b      | 9.91E-14 | 0.208048682  | 0.075 |
| Fam114a1    | 1.01E-13 | -0.363351966 | 0.061 |
| Ppp1r18     | 1.02E-13 | -0.431504853 | 0.017 |
| Adk         | 1.02E-13 | -0.38339415  | 0.043 |
| Ddhd2       | 1.05E-13 | 0.200399918  | 0.063 |
| Cryzl1      | 1.06E-13 | 0.224388298  | 0.152 |
| Mif         | 1.07E-13 | -0.32526058  | 0.137 |
| Mrps6       | 1.09E-13 | 0.303409415  | 0.209 |
| Car2        | 1.24E-13 | -0.244640508 | 0.011 |
| Psmf1       | 1.29E-13 | 0.229170088  | 0.076 |
| BC029214    | 1.34E-13 | 0.223326056  | 0.104 |
| Tcea1       | 1.45E-13 | 0.214219037  | 0.099 |
| Paxbp1      | 1.45E-13 | 0.261123201  | 0.061 |
| Strn3       | 1.49E-13 | 0.273307333  | 0.119 |
| Snca        | 1.55E-13 | 0.098434878  | 0.208 |
| Fam102a     | 1.67E-13 | -0.348567011 | 0.03  |
| Phgdh       | 1.68E-13 | -0.330878858 | 0.189 |
| RP23-32A8.1 | 1.72E-13 | 0.290895243  | 0.107 |
| Auh         | 1.80E-13 | 0.192378576  | 0.096 |
| Stard13     | 1.86E-13 | -0.456787851 | 0.026 |
| Rap2b       | 2.04E-13 | -0.408588562 | 0.025 |
| Tmem258     | 2.28E-13 | 0.31026471   | 0.271 |
| Smarca2     | 2.30E-13 | -0.364272472 | 0.05  |
| Gm8730      | 2.44E-13 | 0.255532935  | 0.062 |
| Ssrp1       | 2.52E-13 | -0.395769611 | 0.086 |
| Smoc1       | 2.67E-13 | -0.249183782 | 0.013 |
| Rnf181      | 2.78E-13 | 0.239910275  | 0.149 |
| H2afv       | 2.80E-13 | -0.417099238 | 0.149 |
| Tmc6        | 3.05E-13 | 0.222457951  | 0.068 |
| Rftn2       | 3.09E-13 | -0.426858244 | 0.038 |
| mt-Co1      | 3.32E-13 | -0.237099495 | 0.608 |
| Stt3b       | 3.49E-13 | -0.344680149 | 0.06  |
| Ccdc41      | 3.60E-13 | 0.24711728   | 0.078 |
| Ndufs8      | 3.77E-13 | -0.325665916 | 0.188 |
| Bloc1s1     | 4.25E-13 | 0.293215239  | 0.254 |
| Fasn        | 4.45E-13 | -0.409822501 | 0.149 |
| Rab3d       | 4.74E-13 | -0.431409299 | 0.025 |
| Tspo        | 4.74E-13 | -0.498586356 | 0.122 |
| Tubb5       | 4.81E-13 | 0.189892304  | 0.427 |

|               |          |              |       |
|---------------|----------|--------------|-------|
| Blvra         | 5.09E-13 | -0.325183543 | 0.011 |
| Gde1          | 5.18E-13 | -0.344031178 | 0.081 |
| Prr13         | 5.19E-13 | -0.411726156 | 0.055 |
| Prss23        | 5.38E-13 | 0.118036022  | 0.175 |
| Snrnp70       | 5.40E-13 | 0.277944546  | 0.188 |
| Polr2f        | 5.43E-13 | -0.343214478 | 0.15  |
| Lym4          | 5.60E-13 | -0.272200111 | 0.029 |
| Tmem80        | 5.75E-13 | 0.199047803  | 0.072 |
| Nlk           | 5.77E-13 | 0.196522294  | 0.059 |
| Clk4          | 6.53E-13 | 0.16317479   | 0.072 |
| Zfand3        | 7.20E-13 | 0.227409567  | 0.143 |
| Frmd4a        | 7.21E-13 | -0.455523454 | 0.028 |
| Stard7        | 7.58E-13 | 0.143844359  | 0.083 |
| Tbc1d17       | 8.12E-13 | 0.250757365  | 0.07  |
| Ech1          | 8.91E-13 | 0.221478769  | 0.266 |
| Zbtb38        | 9.22E-13 | 0.211389514  | 0.143 |
| Ormdl2        | 9.30E-13 | -0.378564433 | 0.033 |
| Plxdc2        | 9.36E-13 | -0.448530877 | 0.128 |
| Gnb2l1        | 9.55E-13 | -0.409468072 | 0.287 |
| Atp5g3        | 9.70E-13 | -0.365973785 | 0.22  |
| Aip           | 1.01E-12 | 0.246107662  | 0.121 |
| Hnrnpa2b1     | 1.07E-12 | -0.252791843 | 0.466 |
| Hmgn5         | 1.11E-12 | -0.3605204   | 0.013 |
| Ccnd3         | 1.16E-12 | -0.312432339 | 0.023 |
| Lyar          | 1.20E-12 | 0.188262713  | 0.102 |
| Cnksr2        | 1.21E-12 | -0.394912051 | 0.013 |
| Knop1         | 1.22E-12 | 0.252441761  | 0.074 |
| Hnrnpl        | 1.24E-12 | 0.220972788  | 0.136 |
| Nadk          | 1.30E-12 | 0.193301618  | 0.104 |
| Plin2         | 1.30E-12 | -0.34261754  | 0.028 |
| Ppic          | 1.31E-12 | -0.397655687 | 0.019 |
| Tmbim6        | 1.37E-12 | 0.221463239  | 0.504 |
| Dlc1          | 1.41E-12 | 0.136878411  | 0.064 |
| Olfml2b       | 1.52E-12 | -0.481765552 | 0.05  |
| Mpc2          | 1.54E-12 | -0.32629956  | 0.232 |
| Tnfrsf1a      | 1.56E-12 | -0.313644626 | 0.013 |
| Pbxip1        | 1.60E-12 | -0.354047721 | 0.053 |
| Sept8         | 1.73E-12 | 0.194033531  | 0.138 |
| 1110004E09Rik | 1.75E-12 | -0.384885    | 0.039 |
| Ssbp2         | 1.83E-12 | -0.385096629 | 0.042 |
| Ppa2          | 1.97E-12 | 0.223684114  | 0.108 |
| Inpp5f        | 2.04E-12 | -0.408265343 | 0.022 |
| Sh3glb2       | 2.19E-12 | 0.211870017  | 0.072 |

|          |          |              |       |
|----------|----------|--------------|-------|
| Bambi    | 2.24E-12 | -0.263592658 | 0.026 |
| Zfp148   | 2.30E-12 | 0.255877886  | 0.118 |
| Ppp2r2a  | 2.32E-12 | -0.402606714 | 0.106 |
| Scaf11   | 2.59E-12 | 0.247838909  | 0.127 |
| Rabac1   | 2.62E-12 | -0.304967234 | 0.346 |
| Spats2l  | 2.72E-12 | -0.276023441 | 0.013 |
| Aprt     | 2.79E-12 | -0.385410626 | 0.055 |
| Inf2     | 2.80E-12 | 0.25829164   | 0.077 |
| Cdc42ep1 | 2.83E-12 | 0.208871722  | 0.075 |
| Olfml1   | 3.12E-12 | -0.367347838 | 0.016 |
| Hibadh   | 3.12E-12 | -0.36344479  | 0.093 |
| Cebpg    | 3.17E-12 | 0.27325349   | 0.093 |
| Taldo1   | 3.50E-12 | 0.171224072  | 0.395 |
| Cox6b1   | 3.59E-12 | -0.262992143 | 0.375 |
| Lgals1   | 3.69E-12 | 0.111828969  | 0.472 |
| Tmod3    | 3.72E-12 | -0.377296781 | 0.039 |
| Antxr1   | 3.86E-12 | -0.385223409 | 0.02  |
| Erbp3    | 4.17E-12 | -0.401438051 | 0.159 |
| Epn2     | 4.20E-12 | 0.223677095  | 0.117 |
| Celf2    | 4.46E-12 | 0.20461117   | 0.275 |
| Bcas2    | 4.65E-12 | -0.405089104 | 0.096 |
| Hist1h1c | 4.89E-12 | -0.336578746 | 0.097 |
| Ppp1r1b  | 5.18E-12 | -0.334798926 | 0.026 |
| Mfap3l   | 5.22E-12 | 0.236574285  | 0.147 |
| Gnptg    | 5.47E-12 | -0.357316872 | 0.093 |
| Pcyox1l  | 5.61E-12 | 0.201256996  | 0.059 |
| Arglu1   | 5.96E-12 | 0.225914935  | 0.265 |
| Lbr      | 6.27E-12 | 0.21482515   | 0.051 |
| Tmem50b  | 6.34E-12 | 0.180796639  | 0.087 |
| Marcks1l | 6.35E-12 | -0.277293411 | 0.1   |
| Tspan14  | 6.59E-12 | -0.344178918 | 0.043 |
| Erc1     | 6.59E-12 | 0.149939402  | 0.053 |
| Rsb1l1   | 6.65E-12 | 0.192512337  | 0.131 |
| Yipf6    | 7.01E-12 | 0.186217304  | 0.055 |
| Reep3    | 7.52E-12 | -0.358677168 | 0.118 |
| Dpysl3   | 8.10E-12 | -0.320452846 | 0.036 |
| Tapbp    | 8.13E-12 | -0.311364825 | 0.056 |
| Rras     | 8.20E-12 | -0.315295785 | 0.025 |
| Gid4     | 8.35E-12 | 0.171704362  | 0.088 |
| Chpf     | 8.87E-12 | -0.337562195 | 0.023 |
| Hey1     | 9.10E-12 | -0.243172724 | 0.018 |
| Hif1a    | 9.14E-12 | 0.191784501  | 0.062 |
| Mpv17    | 9.24E-12 | 0.212946135  | 0.18  |

|               |          |              |       |
|---------------|----------|--------------|-------|
| Atp5c1        | 9.51E-12 | -0.29726232  | 0.292 |
| Eef2          | 9.85E-12 | 0.205360762  | 0.416 |
| Ccdc34        | 9.86E-12 | -0.375817359 | 0.054 |
| Tnrc6c        | 9.94E-12 | 0.198514135  | 0.075 |
| Ctnnb1        | 1.02E-11 | 0.230735087  | 0.256 |
| Stk3          | 1.03E-11 | 0.152003169  | 0.064 |
| Sash1         | 1.05E-11 | -0.370397663 | 0.069 |
| Herpud1       | 1.14E-11 | -0.444693181 | 0.042 |
| Itpripl2      | 1.21E-11 | 0.138649495  | 0.053 |
| Picalm        | 1.23E-11 | 0.222467217  | 0.099 |
| Timp2         | 1.26E-11 | -0.261867047 | 0.269 |
| Vamp5         | 1.28E-11 | 0.235476372  | 0.156 |
| Gnpat         | 1.34E-11 | 0.199584363  | 0.07  |
| Tpm1          | 1.42E-11 | 0.160167231  | 0.172 |
| Angel2        | 1.49E-11 | 0.204071833  | 0.075 |
| Trp53i13      | 1.50E-11 | -0.392871032 | 0.026 |
| Txnrd1        | 1.55E-11 | 0.249253437  | 0.091 |
| Rap2a         | 1.56E-11 | 0.1769975    | 0.168 |
| Eif3j1        | 1.57E-11 | 0.245593442  | 0.088 |
| Rrnad1        | 1.69E-11 | 0.173989167  | 0.054 |
| Dusp11        | 1.82E-11 | 0.198067924  | 0.097 |
| D4Wsu53e      | 1.84E-11 | 0.197642722  | 0.505 |
| Cd320         | 1.95E-11 | 0.235723138  | 0.069 |
| Jund          | 2.00E-11 | 0.191321293  | 0.14  |
| Rtn3          | 2.03E-11 | 0.21620344   | 0.324 |
| Scp2          | 2.08E-11 | -0.31142714  | 0.167 |
| Gm1673        | 2.36E-11 | -0.315236766 | 0.033 |
| Ctsc          | 2.37E-11 | -0.381152723 | 0.069 |
| Isg15         | 2.47E-11 | -0.483910497 | 0.033 |
| Brd8          | 2.49E-11 | 0.239036956  | 0.093 |
| Ywhah         | 2.69E-11 | 0.21459683   | 0.171 |
| Vps37b        | 2.71E-11 | -0.307187109 | 0.024 |
| Nid1          | 2.76E-11 | -0.397762381 | 0.155 |
| Kctd2         | 2.77E-11 | 0.102740703  | 0.067 |
| Map1lc3a      | 2.80E-11 | 0.221618526  | 0.281 |
| Tmem9         | 2.94E-11 | -0.317837479 | 0.053 |
| Nfic          | 3.24E-11 | -0.343000857 | 0.168 |
| Slc22a17      | 3.45E-11 | -0.3076014   | 0.136 |
| March6        | 3.52E-11 | 0.16445372   | 0.057 |
| Acly          | 3.59E-11 | -0.346962924 | 0.076 |
| 0610030E20Rik | 3.62E-11 | 0.155131322  | 0.068 |
| Tgfbr2        | 3.71E-11 | 0.161507382  | 0.055 |
| Mxi1          | 3.94E-11 | -0.390638512 | 0.067 |

|               |          |              |       |
|---------------|----------|--------------|-------|
| Lhfp          | 4.29E-11 | -0.31295344  | 0.108 |
| Irf1          | 4.41E-11 | -0.314927122 | 0.016 |
| Mt2           | 4.44E-11 | 0.330232901  | 0.262 |
| Csnk1a1       | 4.51E-11 | 0.170996402  | 0.367 |
| Psmc3         | 4.55E-11 | 0.205905401  | 0.227 |
| Enpp4         | 4.82E-11 | 0.087858905  | 0.066 |
| Il6st         | 5.05E-11 | -0.385055991 | 0.059 |
| Ubb           | 5.15E-11 | 0.191147863  | 0.755 |
| Psm2          | 5.34E-11 | -0.355000595 | 0.225 |
| Myh9          | 5.44E-11 | 0.21681943   | 0.065 |
| Slc39a13      | 5.69E-11 | 0.164800329  | 0.076 |
| Diap2         | 5.70E-11 | 0.177679716  | 0.056 |
| Tcn2          | 5.78E-11 | -0.362696946 | 0.1   |
| Fam219a       | 5.91E-11 | -0.330394444 | 0.02  |
| Dctn2         | 5.96E-11 | 0.182101454  | 0.274 |
| Fntb          | 6.05E-11 | 0.235300634  | 0.075 |
| mt-Cytb       | 6.27E-11 | -0.062719109 | 0.967 |
| Rbm5          | 6.77E-11 | 0.170163135  | 0.203 |
| 1700020I14Rik | 7.07E-11 | 0.207842931  | 0.118 |
| Igsf11        | 7.30E-11 | -0.333388658 | 0.051 |
| Arf3          | 7.78E-11 | 0.166871517  | 0.058 |
| Ankrd11       | 8.47E-11 | 0.270162473  | 0.168 |
| Cdc42bpa      | 8.56E-11 | 0.228836348  | 0.068 |
| Ift27         | 8.77E-11 | -0.349136934 | 0.041 |
| Olfml2a       | 9.02E-11 | -0.37003226  | 0.049 |
| Slc44a2       | 9.04E-11 | 0.121589688  | 0.06  |
| Amdhd2        | 9.21E-11 | 0.144711467  | 0.06  |
| Gpd1          | 9.32E-11 | -0.323345459 | 0.063 |
| Pigx          | 9.94E-11 | -0.337784576 | 0.024 |
| Fkbp3         | 1.02E-10 | 0.217257396  | 0.33  |
| Blvrb         | 1.08E-10 | -0.383814568 | 0.057 |
| Acot2         | 1.11E-10 | -0.286060391 | 0.021 |
| Cln8          | 1.14E-10 | 0.194605423  | 0.075 |
| Bpgm          | 1.24E-10 | -0.308173692 | 0.029 |
| Rhog          | 1.42E-10 | -0.367243417 | 0.047 |
| Nrcam         | 1.62E-10 | 0.208952939  | 0.063 |
| Ryk           | 1.62E-10 | 0.181349142  | 0.08  |
| Npc1          | 1.66E-10 | 0.226799659  | 0.179 |
| Cisd3         | 1.66E-10 | -0.307946961 | 0.03  |
| Il34          | 1.68E-10 | 0.127791246  | 0.084 |
| Pigq          | 1.70E-10 | 0.183373546  | 0.069 |
| 1300002E11Rik | 1.75E-10 | 0.177427584  | 0.065 |
| Maged2        | 1.88E-10 | -0.402735827 | 0.087 |

|               |          |              |       |
|---------------|----------|--------------|-------|
| Cops2         | 2.12E-10 | 0.187627974  | 0.134 |
| Clu           | 2.15E-10 | -0.300703006 | 0.017 |
| Tpm3          | 2.20E-10 | 0.226671127  | 0.231 |
| Mrps18a       | 2.38E-10 | -0.331932466 | 0.064 |
| Itga7         | 2.41E-10 | -0.286748941 | 0.068 |
| Dhcr7         | 2.42E-10 | -0.249841535 | 0.053 |
| Id4           | 2.50E-10 | -0.194505463 | 0.042 |
| Tns1          | 2.55E-10 | 0.113585723  | 0.104 |
| Clcn6         | 2.63E-10 | 0.148002895  | 0.054 |
| Fxr2          | 2.65E-10 | 0.149056437  | 0.063 |
| Cetn2         | 2.89E-10 | -0.331216953 | 0.069 |
| Camk2d        | 3.04E-10 | -0.331981628 | 0.096 |
| Ppm1m         | 3.09E-10 | 0.179388444  | 0.061 |
| Pla2g16       | 3.23E-10 | 0.183926831  | 0.556 |
| Abcc5         | 3.26E-10 | 0.149281301  | 0.075 |
| Chchd10       | 3.27E-10 | -0.304746232 | 0.091 |
| D17Wsu92e     | 3.30E-10 | 0.172281067  | 0.075 |
| Pnpla2        | 3.34E-10 | 0.121007724  | 0.052 |
| Bri3          | 3.35E-10 | 0.18397363   | 0.116 |
| Pmvk          | 3.63E-10 | -0.355684948 | 0.136 |
| 4833439L19Rik | 3.73E-10 | 0.233655146  | 0.179 |
| Bloc1s5       | 3.90E-10 | 0.134944572  | 0.056 |
| Araf          | 4.21E-10 | 0.217585831  | 0.119 |
| Dap           | 4.40E-10 | 0.128900055  | 0.097 |
| Id2           | 4.47E-10 | -0.331121516 | 0.078 |
| Sys1          | 4.48E-10 | -0.301936407 | 0.1   |
| Micu2         | 4.63E-10 | 0.19893495   | 0.086 |
| Gsto1         | 4.84E-10 | -0.180355183 | 0.02  |
| Ucp2          | 4.87E-10 | 0.172559799  | 0.097 |
| Necap2        | 4.88E-10 | 0.151472845  | 0.099 |
| Wsb1          | 4.98E-10 | 0.183518028  | 0.076 |
| Vwa5a         | 5.03E-10 | -0.332653302 | 0.056 |
| Lphn3         | 5.06E-10 | -0.288980184 | 0.027 |
| Svip          | 5.24E-10 | 0.201958851  | 0.118 |
| Dpysl4        | 5.41E-10 | -0.290893355 | 0.026 |
| Rnh1          | 6.84E-10 | -0.331822819 | 0.074 |
| Galnt1        | 7.00E-10 | -0.298910763 | 0.043 |
| Pura          | 7.05E-10 | 0.194590761  | 0.185 |
| Prpf4b        | 7.19E-10 | 0.227581624  | 0.173 |
| Fbxo44        | 7.23E-10 | -0.243585873 | 0.017 |
| Desi1         | 7.35E-10 | 0.165654456  | 0.09  |
| Zfand5        | 7.43E-10 | 0.173376518  | 0.148 |
| Lamp1         | 7.44E-10 | 0.168246069  | 0.597 |

|               |          |              |       |
|---------------|----------|--------------|-------|
| Stard3nl      | 7.89E-10 | -0.364724382 | 0.134 |
| Hbegf         | 8.02E-10 | -0.397692976 | 0.164 |
| Rhoa          | 8.53E-10 | 0.202494681  | 0.321 |
| 2700060E02Rik | 8.76E-10 | -0.27807458  | 0.165 |
| Ndfip1        | 9.03E-10 | -0.335002493 | 0.057 |
| Fign          | 9.54E-10 | -0.37167225  | 0.056 |
| Gstp1         | 9.73E-10 | -0.287770485 | 0.194 |
| Zeb2          | 9.86E-10 | -0.397598201 | 0.237 |
| Anxa2         | 1.02E-09 | -0.221539167 | 0.48  |
| Pttg1         | 1.03E-09 | -0.365148827 | 0.109 |
| Ezr           | 1.05E-09 | -0.315376814 | 0.145 |
| Tmem87b       | 1.06E-09 | 0.15283629   | 0.064 |
| Cpt1a         | 1.07E-09 | -0.305239553 | 0.037 |
| Pja1          | 1.11E-09 | -0.396435603 | 0.089 |
| Rps2          | 1.12E-09 | 0.215406985  | 0.371 |
| Vma21         | 1.17E-09 | 0.201209272  | 0.136 |
| Fbxo2         | 1.22E-09 | -0.187686765 | 0.024 |
| Deptor        | 1.23E-09 | 0.189905645  | 0.149 |
| Atp6v1a       | 1.24E-09 | -0.304993992 | 0.098 |
| Ank3          | 1.25E-09 | -0.007383379 | 0.255 |
| Fgfr1op2      | 1.41E-09 | 0.219062059  | 0.137 |
| Zfp651        | 1.46E-09 | 0.192220556  | 0.07  |
| AI413582      | 1.50E-09 | -0.260705279 | 0.075 |
| Sord          | 1.65E-09 | 0.10991164   | 0.051 |
| Wbp5          | 1.69E-09 | -0.317571542 | 0.142 |
| Psap          | 1.70E-09 | 0.196134491  | 0.455 |
| Wbp2          | 1.72E-09 | 0.203393085  | 0.195 |
| Med1          | 1.76E-09 | 0.140148353  | 0.061 |
| Rell1         | 1.82E-09 | 0.140401627  | 0.151 |
| Tprkb         | 1.91E-09 | -0.316682118 | 0.028 |
| Prmt2         | 1.93E-09 | 0.139420882  | 0.115 |
| Ash1l         | 1.98E-09 | 0.245012573  | 0.142 |
| Tgfbr3        | 2.06E-09 | -0.418353242 | 0.091 |
| Grcc10        | 2.09E-09 | -0.2729026   | 0.133 |
| Commd6        | 2.15E-09 | -0.332564386 | 0.112 |
| Fuom          | 2.18E-09 | -0.166178677 | 0.021 |
| Zrsr1         | 2.22E-09 | 0.213100422  | 0.069 |
| Hdgfrp3       | 2.28E-09 | 0.190646157  | 0.102 |
| Gpx4          | 2.32E-09 | 0.279034366  | 0.118 |
| 0610007P14Rik | 2.35E-09 | -0.320764282 | 0.079 |
| Ccdc23        | 2.49E-09 | -0.319576136 | 0.076 |
| Ndufb9        | 2.49E-09 | -0.305676541 | 0.262 |
| Dhh           | 2.53E-09 | 0.188750491  | 0.293 |



|               |          |              |       |
|---------------|----------|--------------|-------|
| Rps8          | 2.63E-09 | 0.192259753  | 0.214 |
| Aldh6a1       | 2.64E-09 | 0.197607562  | 0.079 |
| Lsm14a        | 2.65E-09 | 0.21779787   | 0.106 |
| Stx7          | 2.67E-09 | -0.300585372 | 0.145 |
| Col4a1        | 2.73E-09 | 0.134887491  | 0.273 |
| Bag1          | 2.80E-09 | -0.394839414 | 0.105 |
| Dctpp1        | 2.97E-09 | 0.162295588  | 0.058 |
| Insc          | 3.04E-09 | -0.352136606 | 0.104 |
| Ptrf          | 3.13E-09 | 0.090350277  | 0.157 |
| Sap18         | 3.18E-09 | 0.114665486  | 0.106 |
| Txn1          | 3.23E-09 | -0.26900898  | 0.23  |
| Trappc2l      | 3.25E-09 | 0.194846144  | 0.118 |
| Mthfd1        | 3.25E-09 | 0.130473051  | 0.054 |
| Nsdhl         | 3.30E-09 | -0.321182496 | 0.103 |
| Pgrmc1        | 3.42E-09 | 0.162547369  | 0.234 |
| Arhgef40      | 3.57E-09 | 0.178225212  | 0.104 |
| D14Abb1e      | 3.63E-09 | 0.216809463  | 0.061 |
| Tnrc6b        | 3.84E-09 | 0.192525149  | 0.074 |
| Top2b         | 3.91E-09 | -0.349446213 | 0.062 |
| Ing4          | 4.12E-09 | 0.181403669  | 0.12  |
| Gipc1         | 4.16E-09 | -0.262766216 | 0.027 |
| Anapc2        | 4.31E-09 | 0.1441762    | 0.084 |
| Mrps14        | 4.33E-09 | -0.308355306 | 0.105 |
| Msantd4       | 4.44E-09 | -0.287334827 | 0.024 |
| Jak1          | 4.49E-09 | -0.375965083 | 0.069 |
| Rab3c         | 4.55E-09 | -0.320912775 | 0.019 |
| Taf13         | 4.58E-09 | -0.343375871 | 0.082 |
| Rcn2          | 4.83E-09 | -0.286596883 | 0.072 |
| Rpl7a         | 4.86E-09 | 0.185640272  | 0.097 |
| Avpi1         | 4.96E-09 | -0.296866043 | 0.02  |
| Sft2d1        | 5.00E-09 | 0.158950347  | 0.088 |
| Bpnt1         | 5.44E-09 | 0.15939938   | 0.065 |
| Tspan3        | 5.68E-09 | -0.21735302  | 0.443 |
| Adipor1       | 5.88E-09 | 0.147570641  | 0.217 |
| Tmed3         | 6.01E-09 | -0.364667809 | 0.079 |
| Wdr1          | 6.02E-09 | -0.308246549 | 0.065 |
| Psmb4         | 6.04E-09 | -0.328307159 | 0.234 |
| Cyba          | 6.11E-09 | -0.366715865 | 0.032 |
| A630007B06Rik | 6.18E-09 | 0.20026446   | 0.101 |
| Zfc3h1        | 6.28E-09 | 0.177933145  | 0.078 |
| Rhoj          | 6.41E-09 | -0.35778503  | 0.04  |
| Fubp1         | 6.54E-09 | 0.21306452   | 0.135 |
| Cmtm3         | 6.54E-09 | -0.270912648 | 0.036 |

|               |          |              |       |
|---------------|----------|--------------|-------|
| Pdcd6         | 6.55E-09 | -0.317380463 | 0.115 |
| Mrfap1        | 6.67E-09 | 0.194648384  | 0.246 |
| Casc4         | 6.89E-09 | -0.231702207 | 0.048 |
| Zfp706        | 6.97E-09 | 0.152156263  | 0.378 |
| Rab6a         | 7.10E-09 | -0.270137342 | 0.244 |
| Kdsr          | 7.44E-09 | 0.153375586  | 0.071 |
| Ndufa12       | 7.45E-09 | -0.263538753 | 0.114 |
| Mdp1          | 7.76E-09 | 0.148252516  | 0.09  |
| Hexa          | 7.87E-09 | -0.290734792 | 0.095 |
| Ankib1        | 8.12E-09 | 0.144617755  | 0.058 |
| Fstl1         | 8.21E-09 | -0.288908004 | 0.205 |
| Pgs1          | 8.24E-09 | 0.192654289  | 0.056 |
| Dynlt3        | 8.51E-09 | 0.182794868  | 0.277 |
| Stmn2         | 8.76E-09 | -0.333108312 | 0.163 |
| Lats2         | 9.37E-09 | 0.134452066  | 0.066 |
| Hexim1        | 9.66E-09 | -0.222845823 | 0.06  |
| Palm          | 1.03E-08 | 0.164592257  | 0.059 |
| Dnajc1        | 1.19E-08 | -0.26068249  | 0.079 |
| Srsf2         | 1.23E-08 | 0.167594464  | 0.227 |
| Echdc1        | 1.29E-08 | -0.243951084 | 0.039 |
| St13          | 1.34E-08 | 0.184193421  | 0.339 |
| Ndufb6        | 1.34E-08 | -0.270542582 | 0.205 |
| Mrps24        | 1.37E-08 | -0.302696329 | 0.117 |
| Soga3         | 1.38E-08 | -0.279944187 | 0.034 |
| Chd6          | 1.42E-08 | 0.200058292  | 0.113 |
| Tspan31       | 1.53E-08 | -0.304269691 | 0.093 |
| Pithd1        | 1.63E-08 | 0.132078729  | 0.101 |
| Nudt9         | 1.64E-08 | -0.348267369 | 0.139 |
| Ddah1         | 1.66E-08 | 0.174957945  | 0.143 |
| Leprotl1      | 1.72E-08 | 0.17562563   | 0.142 |
| Churc1        | 1.72E-08 | -0.338788941 | 0.072 |
| Josd2         | 1.78E-08 | 0.17938591   | 0.257 |
| Gria3         | 1.84E-08 | -0.360885036 | 0.041 |
| Snx2          | 1.91E-08 | -0.337126647 | 0.076 |
| Cox7a2l       | 1.92E-08 | 0.17498791   | 0.253 |
| Tmem14a       | 1.99E-08 | 0.121457243  | 0.077 |
| Nop56         | 2.07E-08 | 0.160120767  | 0.081 |
| Bicd2         | 2.31E-08 | 0.167440775  | 0.059 |
| Amn1          | 2.35E-08 | 0.060971837  | 0.063 |
| Calm3         | 2.36E-08 | -0.200251066 | 0.266 |
| 1110058L19Rik | 2.36E-08 | -0.324254567 | 0.047 |
| mt-Nd2        | 2.37E-08 | -0.129372238 | 0.713 |
| Dnajc15       | 2.44E-08 | -0.301730587 | 0.031 |

|               |          |              |       |
|---------------|----------|--------------|-------|
| Edf1          | 2.45E-08 | -0.225898832 | 0.3   |
| Nucks1        | 2.46E-08 | 0.14031424   | 0.208 |
| Dnajb14       | 2.63E-08 | 0.112233102  | 0.076 |
| Bmyc          | 2.67E-08 | -0.307162322 | 0.059 |
| Ccnl1         | 2.76E-08 | 0.156364789  | 0.107 |
| Map4          | 2.89E-08 | 0.151952581  | 0.225 |
| Ywhab         | 2.93E-08 | -0.290013501 | 0.284 |
| Pabpn1        | 2.97E-08 | 0.15512102   | 0.061 |
| Rac1          | 3.10E-08 | 0.164947868  | 0.29  |
| Paqr4         | 3.14E-08 | 0.169048421  | 0.137 |
| 4921524J17Rik | 3.32E-08 | 0.109851185  | 0.081 |
| Rps25         | 3.34E-08 | 0.226760611  | 0.208 |
| Lrp6          | 3.38E-08 | 0.18312659   | 0.06  |
| Pcsk5         | 3.38E-08 | -0.228699653 | 0.02  |
| Ccdc50        | 3.48E-08 | -0.384950063 | 0.086 |
| Chd1          | 3.54E-08 | 0.168616156  | 0.075 |
| Ssb           | 3.55E-08 | -0.241368467 | 0.208 |
| Flna          | 3.56E-08 | -0.287509521 | 0.029 |
| Rps18         | 3.57E-08 | 0.250666424  | 0.238 |
| Sh2b1         | 3.64E-08 | 0.128318982  | 0.056 |
| Canx          | 3.67E-08 | -0.194231903 | 0.461 |
| Rad50         | 3.73E-08 | 0.223868156  | 0.067 |
| Prpf39        | 3.78E-08 | 0.129304268  | 0.054 |
| Gpbp1l1       | 3.85E-08 | 0.145826532  | 0.079 |
| Eif4a2        | 3.88E-08 | 0.194234335  | 0.257 |
| Elof1         | 4.02E-08 | -0.28603058  | 0.068 |
| Rrm2b         | 4.03E-08 | 0.146938386  | 0.052 |
| Rpp25l        | 4.33E-08 | -0.286530747 | 0.048 |
| Fra10ac1      | 4.47E-08 | 0.169256207  | 0.059 |
| Krtcap2       | 4.48E-08 | -0.251968105 | 0.174 |
| Atox1         | 4.60E-08 | -0.293664233 | 0.176 |
| Eif4h         | 4.69E-08 | 0.178234631  | 0.2   |
| Mapre1        | 4.71E-08 | -0.363382664 | 0.149 |
| Snap47        | 4.72E-08 | -0.310564631 | 0.03  |
| Rdh11         | 4.77E-08 | 0.158840089  | 0.08  |
| Atp5j2        | 4.89E-08 | -0.264837767 | 0.254 |
| Slc39a6       | 4.99E-08 | -0.280178042 | 0.033 |
| Ldlr          | 5.07E-08 | 0.186072165  | 0.116 |
| Tma7          | 5.11E-08 | 0.239653509  | 0.103 |
| Foxo1         | 5.12E-08 | -0.322487951 | 0.044 |
| Lrrcc1        | 5.13E-08 | 0.180013877  | 0.054 |
| Fbxl3         | 5.32E-08 | 0.186441616  | 0.07  |
| Bad           | 5.39E-08 | -0.302667312 | 0.043 |

|           |          |              |       |
|-----------|----------|--------------|-------|
| Dst       | 5.80E-08 | -0.306636818 | 0.254 |
| Higd2a    | 5.96E-08 | 0.173901787  | 0.294 |
| Nudcd3    | 6.03E-08 | 0.125879658  | 0.069 |
| Arpp19    | 6.05E-08 | 0.217686534  | 0.198 |
| Mvk       | 6.16E-08 | -0.292982753 | 0.058 |
| Hint1     | 6.24E-08 | -0.224814499 | 0.352 |
| Col5a2    | 6.25E-08 | -0.369843334 | 0.081 |
| Usp22     | 6.34E-08 | 0.121442665  | 0.076 |
| Ythdc1    | 7.09E-08 | 0.299052953  | 0.184 |
| Abhd17b   | 7.10E-08 | -0.189758543 | 0.023 |
| Rnf145    | 7.14E-08 | 0.18159211   | 0.057 |
| Rps26-ps1 | 7.22E-08 | 0.187725284  | 0.121 |
| Cdc37l1   | 7.32E-08 | 0.1908498    | 0.111 |
| Cstb      | 7.35E-08 | -0.321904143 | 0.134 |
| Sesn1     | 7.40E-08 | 0.078531982  | 0.108 |
| Arhgap5   | 7.42E-08 | 0.178635606  | 0.116 |
| Rbm26     | 7.44E-08 | 0.146916182  | 0.085 |
| Slc31a1   | 7.53E-08 | -0.291057071 | 0.033 |
| Dmtf1     | 7.64E-08 | 0.189796151  | 0.056 |
| Rab11b    | 7.65E-08 | 0.167177807  | 0.167 |
| Serf2     | 7.86E-08 | 0.197514103  | 0.213 |
| H3f3b     | 7.97E-08 | 0.142976969  | 0.635 |
| Rps16     | 8.00E-08 | 0.200269121  | 0.173 |
| Mertk     | 8.02E-08 | 0.155951732  | 0.058 |
| Arhgap12  | 8.18E-08 | 0.138820787  | 0.075 |
| Abat      | 8.62E-08 | -0.267168256 | 0.041 |
| Gpx7      | 8.77E-08 | -0.366730125 | 0.051 |
| Gemin7    | 8.98E-08 | -0.239699605 | 0.031 |
| Cul3      | 9.00E-08 | 0.161661933  | 0.06  |
| Neu1      | 9.01E-08 | 0.130353733  | 0.06  |
| Celf1     | 9.18E-08 | 0.113701138  | 0.098 |
| B9d1      | 9.18E-08 | -0.293842097 | 0.036 |
| Ppp1r12a  | 9.31E-08 | 0.203927302  | 0.111 |
| Csnk1d    | 9.41E-08 | 0.139210557  | 0.079 |
| Ctnnbip1  | 9.62E-08 | -0.331720957 | 0.111 |
| Ndufb10   | 9.88E-08 | -0.281718521 | 0.26  |
| Rbm39     | 1.01E-07 | 0.173625546  | 0.413 |
| Foxd3     | 1.02E-07 | -0.311758766 | 0.026 |
| Rpl13     | 1.04E-07 | 0.253683129  | 0.226 |
| Exoc3     | 1.06E-07 | 0.13915566   | 0.135 |
| Rpe       | 1.06E-07 | -0.236248966 | 0.034 |
| Igsf8     | 1.06E-07 | 0.223280007  | 0.09  |
| Pick1     | 1.07E-07 | 0.147026573  | 0.051 |

|               |          |              |       |
|---------------|----------|--------------|-------|
| Fam96a        | 1.08E-07 | -0.265817866 | 0.053 |
| Sdc3          | 1.10E-07 | -0.275900752 | 0.085 |
| Chchd2        | 1.12E-07 | -0.166758071 | 0.438 |
| Jmjd6         | 1.17E-07 | 0.162968315  | 0.063 |
| Rcn3          | 1.25E-07 | -0.263434578 | 0.174 |
| Acadm         | 1.29E-07 | -0.257796789 | 0.148 |
| Pisd          | 1.39E-07 | 0.144527107  | 0.106 |
| March2        | 1.43E-07 | 0.154080505  | 0.09  |
| Egfl8         | 1.46E-07 | 0.182122173  | 0.427 |
| Rpn1          | 1.47E-07 | -0.298390799 | 0.118 |
| Syf2          | 1.53E-07 | 0.179535751  | 0.233 |
| Pdcd5         | 1.53E-07 | 0.202987786  | 0.094 |
| Fam58b        | 1.57E-07 | -0.273608623 | 0.024 |
| Gusb          | 1.60E-07 | -0.246999488 | 0.03  |
| Pex19         | 1.61E-07 | 0.143355997  | 0.079 |
| Klhdc3        | 1.66E-07 | 0.09098189   | 0.063 |
| Lgi1          | 1.67E-07 | -0.380026035 | 0.032 |
| Clcn3         | 1.70E-07 | 0.150972756  | 0.181 |
| Ugdh          | 1.71E-07 | -0.259696295 | 0.029 |
| Tcf12         | 1.72E-07 | -0.255709445 | 0.039 |
| Copz1         | 1.74E-07 | -0.247406359 | 0.062 |
| Rpl13a        | 1.80E-07 | -0.138464359 | 0.585 |
| Mrpl14        | 1.88E-07 | -0.301288151 | 0.068 |
| Lrp10         | 1.94E-07 | -0.225901599 | 0.054 |
| Syne2         | 2.02E-07 | 0.138797345  | 0.111 |
| Ptpn1         | 2.03E-07 | 0.127331815  | 0.072 |
| Tox4          | 2.08E-07 | 0.136560496  | 0.078 |
| Ift57         | 2.15E-07 | -0.29059965  | 0.035 |
| Ddx6          | 2.16E-07 | 0.135068014  | 0.182 |
| Arpc3         | 2.23E-07 | 0.174643089  | 0.155 |
| Rpl37a        | 2.24E-07 | 0.167722551  | 0.197 |
| Safb2         | 2.25E-07 | 0.133802988  | 0.101 |
| Rpl37         | 2.26E-07 | 0.164124136  | 0.142 |
| 2410006H16Rik | 2.41E-07 | 0.105899138  | 0.091 |
| Endod1        | 2.46E-07 | 0.101703902  | 0.131 |
| Bcl7a         | 2.50E-07 | 0.112221918  | 0.051 |
| Mrpl43        | 2.57E-07 | 0.108128808  | 0.14  |
| Dnaja1        | 2.66E-07 | 0.173105853  | 0.262 |
| Fez1          | 2.74E-07 | 0.166323029  | 0.195 |
| Ndufa8        | 2.74E-07 | -0.27667439  | 0.162 |
| Suv420h1      | 2.77E-07 | 0.143139764  | 0.061 |
| Prcc2c        | 2.83E-07 | 0.180602914  | 0.263 |
| Hsd3b7        | 2.84E-07 | -0.221452805 | 0.023 |

|          |          |              |       |
|----------|----------|--------------|-------|
| Ndufa4   | 2.88E-07 | -0.185841    | 0.381 |
| Gm12688  | 3.01E-07 | -0.345240855 | 0.036 |
| Bhlhe40  | 3.05E-07 | -0.358612873 | 0.029 |
| Lifr     | 3.11E-07 | -0.17949168  | 0.027 |
| Dap3     | 3.11E-07 | -0.244710576 | 0.039 |
| Arl8a    | 3.12E-07 | 0.116303559  | 0.146 |
| Leprel2  | 3.21E-07 | -0.265763553 | 0.023 |
| Hsd17b10 | 3.42E-07 | -0.342393576 | 0.159 |
| Ifnar2   | 3.47E-07 | -0.334872015 | 0.079 |
| Appbp2   | 3.47E-07 | 0.147403044  | 0.1   |
| Pdgfa    | 3.50E-07 | -0.06403256  | 0.146 |
| Shfm1    | 3.63E-07 | -0.282297642 | 0.238 |
| Trove2   | 3.64E-07 | 0.172939532  | 0.088 |
| Capns1   | 3.90E-07 | -0.265365985 | 0.296 |
| Leprel4  | 3.94E-07 | -0.2336824   | 0.036 |
| Hsd17b12 | 3.99E-07 | -0.270803497 | 0.166 |
| Vamp2    | 4.11E-07 | 0.166948142  | 0.111 |
| Selm     | 4.23E-07 | -0.263435951 | 0.317 |
| Sc5d     | 4.41E-07 | 0.198530009  | 0.22  |
| Thoc2    | 4.45E-07 | 0.140585608  | 0.126 |
| Gatsl2   | 4.51E-07 | 0.144715906  | 0.051 |
| Mrpl17   | 4.61E-07 | -0.294327332 | 0.106 |
| Cnot6    | 4.63E-07 | 0.138504497  | 0.078 |
| Pank3    | 4.63E-07 | 0.114774443  | 0.078 |
| Xaf1     | 4.66E-07 | -0.321583828 | 0.076 |
| Hiat1    | 4.72E-07 | 0.146905993  | 0.082 |
| Top1     | 4.81E-07 | -0.229955212 | 0.118 |
| Angptl4  | 4.81E-07 | -0.219662084 | 0.07  |
| Hspa9    | 4.88E-07 | -0.274539262 | 0.119 |
| Hn1      | 4.99E-07 | -0.288759096 | 0.083 |
| Hmgn1    | 5.03E-07 | -0.269499386 | 0.212 |
| Ankrd40  | 5.06E-07 | 0.101650912  | 0.065 |
| Ank2     | 5.18E-07 | 0.194289922  | 0.072 |
| Sar1b    | 5.21E-07 | -0.294823442 | 0.111 |
| Camta1   | 5.35E-07 | 0.205596015  | 0.087 |
| Pgls     | 5.45E-07 | -0.292291358 | 0.101 |
| Taf9b    | 5.48E-07 | 0.120877836  | 0.056 |
| Aggf1    | 5.52E-07 | -0.259976893 | 0.067 |
| Tmem256  | 5.56E-07 | -0.205635174 | 0.235 |
| Hmgb1    | 5.72E-07 | 0.180702781  | 0.168 |
| Rpl7     | 5.82E-07 | 0.15000173   | 0.364 |
| Apip     | 5.88E-07 | -0.213063206 | 0.044 |
| Plp1     | 5.97E-07 | 0.153385135  | 0.96  |

|               |          |              |       |
|---------------|----------|--------------|-------|
| Ptov1         | 6.00E-07 | -0.26855667  | 0.128 |
| Morn2         | 6.22E-07 | -0.257734292 | 0.029 |
| Etv1          | 6.42E-07 | -0.279742722 | 0.028 |
| Bag3          | 6.61E-07 | -0.288889798 | 0.032 |
| Pxmp2         | 6.62E-07 | -0.256840195 | 0.027 |
| Ndufv2        | 6.68E-07 | 0.164522333  | 0.321 |
| Ppp2r5e       | 6.70E-07 | -0.29895909  | 0.045 |
| Lpcat1        | 6.72E-07 | -0.33646327  | 0.063 |
| Paqr7         | 6.76E-07 | 0.071279271  | 0.081 |
| Kif1b         | 6.81E-07 | -0.22394499  | 0.272 |
| Atp6ap2       | 6.82E-07 | 0.133017785  | 0.136 |
| Eef1d         | 6.82E-07 | 0.121488349  | 0.28  |
| Taok1         | 6.84E-07 | 0.146673389  | 0.122 |
| Epc1          | 6.88E-07 | 0.164255017  | 0.062 |
| Bach1         | 6.95E-07 | -0.255744386 | 0.042 |
| Nr1h2         | 7.03E-07 | 0.115703844  | 0.054 |
| Adam17        | 7.30E-07 | -0.253482718 | 0.044 |
| Atp2c1        | 7.71E-07 | 0.090342979  | 0.074 |
| Tmpo          | 7.90E-07 | 0.143416997  | 0.082 |
| Pigs          | 7.97E-07 | 0.125504343  | 0.053 |
| Cenpb         | 8.09E-07 | 0.208619924  | 0.081 |
| Cdk19         | 8.69E-07 | -0.26133538  | 0.024 |
| Hnrnpdl       | 8.85E-07 | 0.160035619  | 0.212 |
| Pkm           | 8.90E-07 | -0.272584102 | 0.204 |
| Dync1i2       | 9.06E-07 | 0.128685041  | 0.306 |
| Antxr2        | 9.19E-07 | -0.356414208 | 0.025 |
| Aldh3a2       | 9.23E-07 | 0.071032739  | 0.06  |
| Phf20l1       | 9.45E-07 | 0.178558589  | 0.087 |
| Uaca          | 9.49E-07 | -0.32106597  | 0.165 |
| Preli1        | 9.55E-07 | 0.224735785  | 0.144 |
| Gramd1b       | 1.07E-06 | -0.204791635 | 0.063 |
| Pts           | 1.10E-06 | -0.251833259 | 0.038 |
| Polr2i        | 1.10E-06 | -0.229518602 | 0.073 |
| Polr2e        | 1.11E-06 | 0.144051493  | 0.16  |
| Klf6          | 1.11E-06 | 0.088890991  | 0.235 |
| Rabgap1       | 1.15E-06 | 0.092113541  | 0.098 |
| Slc35a4       | 1.17E-06 | 0.11352036   | 0.06  |
| Spred1        | 1.18E-06 | -0.308813766 | 0.03  |
| Pdzd8         | 1.20E-06 | 0.187957279  | 0.056 |
| Tbc1d9b       | 1.23E-06 | 0.138440281  | 0.064 |
| 4931406C07Rik | 1.27E-06 | -0.215581633 | 0.053 |
| Ppt1          | 1.29E-06 | 0.190714409  | 0.174 |
| Fam212b       | 1.34E-06 | 0.173192179  | 0.102 |

|               |          |              |       |
|---------------|----------|--------------|-------|
| Carkd         | 1.36E-06 | -0.255827095 | 0.125 |
| Ddt           | 1.37E-06 | -0.262497691 | 0.084 |
| Mzt2          | 1.45E-06 | -0.278150803 | 0.037 |
| Urm1          | 1.47E-06 | 0.115413487  | 0.062 |
| Rexo2         | 1.47E-06 | -0.345300776 | 0.148 |
| Insig1        | 1.50E-06 | 0.161492227  | 0.176 |
| Sun1          | 1.50E-06 | 0.099998446  | 0.071 |
| Cdc73         | 1.51E-06 | 0.103883795  | 0.051 |
| Hmgxb4        | 1.53E-06 | 0.134826507  | 0.057 |
| Cldn25        | 1.56E-06 | 0.19056561   | 0.246 |
| Rab1b         | 1.56E-06 | 0.14714242   | 0.128 |
| Fdx1          | 1.59E-06 | -0.230906709 | 0.031 |
| Cdk12         | 1.62E-06 | 0.110326863  | 0.06  |
| Psmb1         | 1.65E-06 | -0.204328865 | 0.314 |
| P2rx7         | 1.66E-06 | 0.143336232  | 0.069 |
| Sh3d19        | 1.66E-06 | 0.13360991   | 0.162 |
| 0610011F06Rik | 1.68E-06 | -0.225399266 | 0.05  |
| Txndc17       | 1.76E-06 | -0.297510332 | 0.174 |
| Mlf2          | 1.76E-06 | 0.203317435  | 0.255 |
| Scg5          | 1.81E-06 | -0.168978012 | 0.029 |
| Syng1         | 1.85E-06 | 0.203394923  | 0.168 |
| Tbc1d15       | 1.85E-06 | 0.079150972  | 0.086 |
| Ormdl3        | 1.88E-06 | -0.222986209 | 0.035 |
| Clip3         | 1.89E-06 | 0.080895083  | 0.118 |
| Atp5d         | 1.90E-06 | -0.204887319 | 0.369 |
| Pde6d         | 1.94E-06 | 0.094107539  | 0.119 |
| Arl13b        | 1.95E-06 | 0.109165442  | 0.067 |
| Clic4         | 1.96E-06 | -0.242610156 | 0.208 |
| Rpl18a        | 2.00E-06 | 0.232129264  | 0.222 |
| Dhrs7         | 2.00E-06 | -0.333566085 | 0.082 |
| Tipin         | 2.15E-06 | -0.231444092 | 0.029 |
| Fam3c         | 2.16E-06 | -0.235705957 | 0.045 |
| Mtpn          | 2.24E-06 | 0.080246262  | 0.225 |
| Atp8a1        | 2.27E-06 | 0.133131591  | 0.212 |
| Park7         | 2.29E-06 | -0.257966974 | 0.241 |
| Fam129b       | 2.38E-06 | 0.135745985  | 0.061 |
| Cox7b         | 2.39E-06 | -0.197063816 | 0.241 |
| Cgrrf1        | 2.47E-06 | 0.134204586  | 0.09  |
| Car11         | 2.48E-06 | 0.13777032   | 0.063 |
| Poldip3       | 2.49E-06 | 0.130308708  | 0.063 |
| Sppl2a        | 2.54E-06 | 0.129368672  | 0.098 |
| Stx12         | 2.57E-06 | 0.161008217  | 0.125 |
| Ube2r2        | 2.58E-06 | -0.232567337 | 0.127 |



|               |          |              |       |
|---------------|----------|--------------|-------|
| Fau           | 2.67E-06 | 0.15387059   | 0.071 |
| Naa38         | 2.80E-06 | 0.141427824  | 0.13  |
| Fam96b        | 2.85E-06 | 0.109480517  | 0.122 |
| Itih5         | 2.86E-06 | 0.123044044  | 0.263 |
| Oraov1        | 2.92E-06 | -0.237884124 | 0.029 |
| Dalrd3        | 3.03E-06 | -0.205519539 | 0.03  |
| Afap1l2       | 3.09E-06 | -0.275720581 | 0.096 |
| Phpt1         | 3.15E-06 | -0.235714452 | 0.093 |
| Sptssa        | 3.30E-06 | -0.2440135   | 0.203 |
| Rpl41         | 3.31E-06 | 0.163680924  | 0.385 |
| Txndc15       | 3.33E-06 | -0.287696649 | 0.09  |
| Ccdc59        | 3.33E-06 | 0.136878793  | 0.163 |
| Cdc42         | 3.35E-06 | 0.128304248  | 0.473 |
| 2700089E24Rik | 3.36E-06 | -0.250952003 | 0.174 |
| Carhsp1       | 3.40E-06 | -0.170438201 | 0.027 |
| Snx13         | 3.47E-06 | 0.116148089  | 0.064 |
| Ehd3          | 3.57E-06 | -0.219331061 | 0.04  |
| Tm7sf3        | 3.64E-06 | 0.105158395  | 0.26  |
| Cdc5l         | 3.75E-06 | 0.150831691  | 0.154 |
| Evi5          | 3.84E-06 | 0.149317125  | 0.193 |
| Rbm25         | 3.87E-06 | 0.187214849  | 0.286 |
| Eci1          | 3.88E-06 | -0.268272872 | 0.103 |
| Faf2          | 3.92E-06 | -0.247767509 | 0.053 |
| Diap3         | 3.96E-06 | 0.125774119  | 0.078 |
| Pex5l         | 3.97E-06 | -0.330875593 | 0.091 |
| Atp5h         | 3.98E-06 | -0.170864633 | 0.349 |
| Cbr1          | 4.02E-06 | -0.230383889 | 0.057 |
| Atf4          | 4.07E-06 | 0.162310162  | 0.211 |
| Commd1        | 4.07E-06 | -0.253461705 | 0.094 |
| Bud31         | 4.19E-06 | -0.264326223 | 0.097 |
| Itgb8         | 4.25E-06 | -0.267736769 | 0.153 |
| Grn           | 4.28E-06 | -0.251156898 | 0.096 |
| P2rx4         | 4.46E-06 | -0.238374328 | 0.035 |
| Tecr          | 4.51E-06 | -0.180758671 | 0.419 |
| Rps26         | 4.57E-06 | 0.139884083  | 0.286 |
| Pds5b         | 4.61E-06 | 0.107127624  | 0.078 |
| 1110008F13Rik | 4.73E-06 | -0.267696222 | 0.08  |
| Rpl32         | 4.80E-06 | -0.182096175 | 0.422 |
| Ubxn6         | 4.81E-06 | 0.128816962  | 0.121 |
| Sgce          | 4.81E-06 | -0.276566327 | 0.168 |
| Klf13         | 4.83E-06 | 0.160381577  | 0.141 |
| Rplp1         | 5.11E-06 | 0.18240027   | 0.621 |
| Uqcr11        | 5.13E-06 | -0.197395931 | 0.231 |

|               |          |              |       |
|---------------|----------|--------------|-------|
| Ppp1r15a      | 5.15E-06 | 0.096894463  | 0.124 |
| Zdhhc20       | 5.16E-06 | 0.10535419   | 0.06  |
| Plin3         | 5.16E-06 | -0.244146575 | 0.192 |
| Rbm18         | 5.31E-06 | 0.067519242  | 0.063 |
| Taf1d         | 5.45E-06 | 0.188078157  | 0.056 |
| Bcl2l1        | 5.45E-06 | 0.072760456  | 0.053 |
| Mycbp2        | 5.52E-06 | 0.132742632  | 0.137 |
| Asph          | 5.95E-06 | -0.310014789 | 0.036 |
| Aurkaip1      | 6.06E-06 | -0.279327286 | 0.126 |
| Sc4mol        | 6.18E-06 | 0.180742626  | 0.413 |
| Sod1          | 6.24E-06 | -0.22556792  | 0.2   |
| Hexb          | 6.24E-06 | -0.272151144 | 0.06  |
| Trappc6b      | 6.29E-06 | 0.201533168  | 0.105 |
| Vrk3          | 6.35E-06 | 0.122450649  | 0.066 |
| Pxn           | 6.37E-06 | 0.083277809  | 0.1   |
| Mocs2         | 6.39E-06 | -0.239787095 | 0.26  |
| Pja2          | 6.50E-06 | 0.052643934  | 0.217 |
| Tpp1          | 6.53E-06 | -0.27664385  | 0.085 |
| Dars          | 6.75E-06 | -0.159803966 | 0.088 |
| Epb4.1l3      | 6.83E-06 | -0.286003905 | 0.031 |
| Scarb2        | 6.84E-06 | -0.282873434 | 0.059 |
| 2210013O21Rik | 6.88E-06 | -0.232045518 | 0.053 |
| Csad          | 6.88E-06 | -0.209555668 | 0.055 |
| Tsc22d1       | 7.01E-06 | 0.119570641  | 0.057 |
| Cby1          | 7.30E-06 | -0.203248786 | 0.03  |
| Scap          | 7.32E-06 | 0.104716135  | 0.061 |
| Rps10-ps1     | 7.36E-06 | 0.170324676  | 0.086 |
| Sfxn3         | 7.40E-06 | 0.120217933  | 0.051 |
| Psmd6         | 7.51E-06 | -0.249044049 | 0.082 |
| Usp1          | 7.51E-06 | 0.15579964   | 0.088 |
| Lztr1         | 7.52E-06 | 0.067933957  | 0.076 |
| Ergic3        | 7.72E-06 | -0.244787364 | 0.156 |
| Slc44a1       | 7.94E-06 | 0.115118057  | 0.286 |
| Gab1          | 8.06E-06 | 0.096470888  | 0.091 |
| Krcc1         | 8.08E-06 | -0.258866535 | 0.103 |
| Lxn           | 8.24E-06 | 0.046001574  | 0.086 |
| Serbp1        | 8.35E-06 | -0.176354057 | 0.307 |
| Tceal8        | 8.44E-06 | -0.282819056 | 0.128 |
| Rab8b         | 8.53E-06 | 0.076018829  | 0.079 |
| Tmco3         | 8.61E-06 | 0.117706581  | 0.07  |
| Ifitm2        | 8.66E-06 | -0.292185451 | 0.091 |
| Tab2          | 8.76E-06 | -0.281889949 | 0.132 |
| H2afj         | 8.84E-06 | 0.1825319    | 0.179 |

|               |          |              |       |
|---------------|----------|--------------|-------|
| Nedd8         | 8.86E-06 | -0.251772489 | 0.253 |
| Hsp90ab1      | 9.05E-06 | -0.097737947 | 0.812 |
| Idh2          | 9.22E-06 | -0.19150614  | 0.062 |
| Actr3         | 9.42E-06 | 0.15803435   | 0.097 |
| Hnrnpc        | 9.43E-06 | -0.232920302 | 0.247 |
| Ccdc107       | 9.45E-06 | -0.258641575 | 0.071 |
| Zdhhc3        | 9.45E-06 | 0.115219767  | 0.1   |
| Tmem14c       | 9.61E-06 | -0.251324814 | 0.119 |
| Riok3         | 9.75E-06 | 0.168793181  | 0.102 |
| Ndufb7        | 9.85E-06 | -0.206883176 | 0.211 |
| Cul1          | 9.88E-06 | -0.259053692 | 0.073 |
| Ap2s1         | 9.98E-06 | -0.23427258  | 0.134 |
| Agpat5        | 1.00E-05 | -0.209214491 | 0.051 |
| Srebf2        | 1.00E-05 | 0.145373245  | 0.076 |
| Tmprss5       | 1.01E-05 | -0.29086026  | 0.07  |
| Ap2a2         | 1.02E-05 | 0.054616326  | 0.056 |
| Lpcat2        | 1.03E-05 | -0.308949381 | 0.047 |
| Nudt19        | 1.05E-05 | -0.276864682 | 0.041 |
| Rit1          | 1.05E-05 | -0.288207583 | 0.056 |
| Tm2d3         | 1.05E-05 | -0.229739459 | 0.057 |
| Srp9          | 1.06E-05 | -0.207696853 | 0.11  |
| Mtch1         | 1.07E-05 | -0.234119976 | 0.14  |
| Cuta          | 1.09E-05 | -0.220749251 | 0.159 |
| Rdm1          | 1.10E-05 | 0.111098995  | 0.083 |
| Psmb7         | 1.11E-05 | 0.172769889  | 0.076 |
| Capzb         | 1.11E-05 | -0.270689465 | 0.183 |
| Parva         | 1.14E-05 | 0.106362898  | 0.192 |
| Snhg3         | 1.15E-05 | 0.142430577  | 0.076 |
| Slc41a1       | 1.16E-05 | 0.12578203   | 0.056 |
| Srrt          | 1.16E-05 | -0.267340916 | 0.073 |
| Srsf7         | 1.16E-05 | 0.156160836  | 0.121 |
| Nf1           | 1.17E-05 | 0.153979936  | 0.087 |
| 2410015M20Rik | 1.21E-05 | -0.214019876 | 0.133 |
| Slc39a10      | 1.24E-05 | 0.107352636  | 0.059 |
| 1110038F14Rik | 1.25E-05 | -0.183400016 | 0.047 |
| Zfp644        | 1.27E-05 | 0.13212193   | 0.064 |
| Bdp1          | 1.28E-05 | 0.125941935  | 0.057 |
| Mef2a         | 1.30E-05 | 0.107669587  | 0.068 |
| Ebp           | 1.30E-05 | -0.258962305 | 0.061 |
| Sec61b        | 1.31E-05 | -0.210039088 | 0.152 |
| Rarg          | 1.32E-05 | 0.108230369  | 0.078 |
| Lancl1        | 1.32E-05 | 0.13838993   | 0.063 |
| Srd5a3        | 1.36E-05 | 0.111433832  | 0.052 |

|               |          |              |       |
|---------------|----------|--------------|-------|
| Lama4         | 1.37E-05 | -0.28879482  | 0.126 |
| Jmy           | 1.37E-05 | 0.119025306  | 0.079 |
| Ate1          | 1.39E-05 | 0.13740926   | 0.062 |
| Tmem55a       | 1.45E-05 | -0.242177875 | 0.04  |
| Ppp2r1a       | 1.45E-05 | -0.207790225 | 0.091 |
| Kmt2a         | 1.49E-05 | 0.151838475  | 0.103 |
| Nfib          | 1.49E-05 | 0.186901687  | 0.148 |
| Snrpd1        | 1.53E-05 | -0.330607112 | 0.087 |
| Gm561         | 1.55E-05 | 0.074315979  | 0.08  |
| Tmem165       | 1.61E-05 | -0.237726778 | 0.048 |
| Rasgef1c      | 1.64E-05 | -0.417985663 | 0.031 |
| Sf3a1         | 1.72E-05 | -0.197039813 | 0.047 |
| Snrpb         | 1.73E-05 | -0.249523622 | 0.2   |
| Prpf40b       | 1.74E-05 | 0.118375299  | 0.059 |
| 2310036O22Rik | 1.81E-05 | -0.201766093 | 0.133 |
| Preb          | 1.82E-05 | 0.14023576   | 0.065 |
| P4ha1         | 1.84E-05 | 0.135390026  | 0.162 |
| Hdac1         | 1.89E-05 | -0.220384809 | 0.071 |
| Vgll4         | 1.90E-05 | 0.080620702  | 0.154 |
| Hist3h2a      | 1.90E-05 | 0.114979386  | 0.124 |
| Zc2hc1a       | 1.91E-05 | 0.099644858  | 0.053 |
| Fkbp4         | 1.91E-05 | -0.227451632 | 0.122 |
| Gtf3c6        | 1.93E-05 | -0.214093863 | 0.035 |
| Itgav         | 1.93E-05 | -0.320593705 | 0.057 |
| Akap8l        | 1.93E-05 | 0.141262243  | 0.104 |
| Pkig          | 1.96E-05 | -0.289177604 | 0.085 |
| 1700123O20Rik | 1.97E-05 | -0.186031225 | 0.036 |
| Smek1         | 1.98E-05 | 0.087351334  | 0.06  |
| Naca          | 1.99E-05 | 0.121923507  | 0.238 |
| Polr3gl       | 1.99E-05 | -0.221014689 | 0.038 |
| Eif5b         | 2.01E-05 | -0.174482423 | 0.189 |
| Rab14         | 2.03E-05 | -0.203673502 | 0.257 |
| Scamp5        | 2.04E-05 | 0.161318159  | 0.07  |
| Ilkap         | 2.04E-05 | 0.112075314  | 0.104 |
| Brwd1         | 2.05E-05 | 0.172436421  | 0.057 |
| Dbp           | 2.07E-05 | 0.129780371  | 0.082 |
| Gpd2          | 2.09E-05 | 0.164542158  | 0.094 |
| Kmt2c         | 2.09E-05 | 0.185611063  | 0.096 |
| Lin7c         | 2.10E-05 | 0.096687101  | 0.072 |
| Timm10        | 2.15E-05 | -0.213464382 | 0.038 |
| Lima1         | 2.31E-05 | -0.258577755 | 0.045 |
| Ufc1          | 2.32E-05 | -0.246285099 | 0.115 |
| Acss2         | 2.33E-05 | -0.167451842 | 0.082 |

|               |          |              |       |
|---------------|----------|--------------|-------|
| 0610031J06Rik | 2.36E-05 | -0.236924405 | 0.07  |
| Ctns          | 2.45E-05 | -0.230188263 | 0.036 |
| Pdzd2         | 2.46E-05 | -0.2509435   | 0.044 |
| Rab28         | 2.50E-05 | -0.177217073 | 0.029 |
| Ptges3        | 2.53E-05 | 0.135752384  | 0.158 |
| Zmiz1         | 2.57E-05 | -0.25362347  | 0.033 |
| Ppap2b        | 2.58E-05 | -0.161510375 | 0.361 |
| Wnk1          | 2.67E-05 | 0.155403679  | 0.115 |
| Pxmp4         | 2.70E-05 | -0.261918414 | 0.037 |
| Cox5a         | 2.72E-05 | -0.199288696 | 0.248 |
| Tmem63b       | 2.77E-05 | 0.110676345  | 0.079 |
| Rps23         | 2.79E-05 | 0.162338271  | 0.066 |
| Mrps28        | 2.80E-05 | -0.221352507 | 0.105 |
| Mrpl41        | 2.85E-05 | -0.221725443 | 0.062 |
| Alkbh7        | 2.85E-05 | 0.088193249  | 0.087 |
| Pum2          | 2.94E-05 | 0.127549778  | 0.057 |
| Slc25a10      | 2.94E-05 | 0.094856933  | 0.076 |
| Zbtb7a        | 3.00E-05 | 0.12102189   | 0.109 |
| Mxra7         | 3.17E-05 | 0.10335079   | 0.089 |
| Rpl26         | 3.19E-05 | 0.135361537  | 0.37  |
| Pcna          | 3.27E-05 | 0.129398417  | 0.119 |
| Ybx3          | 3.29E-05 | -0.320456973 | 0.109 |
| Denr          | 3.36E-05 | 0.153776533  | 0.138 |
| Ubqln1        | 3.42E-05 | 0.135370283  | 0.127 |
| 2210016F16Rik | 3.46E-05 | -0.212827937 | 0.042 |
| Ift81         | 3.52E-05 | -0.1901861   | 0.028 |
| Tspan13       | 3.52E-05 | 0.072329081  | 0.115 |
| Erp44         | 3.53E-05 | -0.294899238 | 0.074 |
| Atp5a1        | 3.62E-05 | -0.204223508 | 0.308 |
| Ppp1r35       | 3.68E-05 | -0.154598469 | 0.03  |
| Golim4        | 3.73E-05 | -0.195646965 | 0.048 |
| Cox6c         | 3.75E-05 | -0.154947655 | 0.381 |
| Luc7l3        | 3.84E-05 | 0.128024204  | 0.287 |
| Ift74         | 3.89E-05 | -0.241112404 | 0.055 |
| Selk          | 4.00E-05 | -0.111142406 | 0.469 |
| Lims1         | 4.09E-05 | -0.25878812  | 0.096 |
| Prmt5         | 4.14E-05 | 0.061475972  | 0.082 |
| Trappc4       | 4.14E-05 | 0.131634457  | 0.145 |
| Smarca5       | 4.15E-05 | 0.152283194  | 0.107 |
| Rbbp9         | 4.20E-05 | -0.246457465 | 0.056 |
| Got2          | 4.22E-05 | 0.084866028  | 0.079 |
| Upf3a         | 4.38E-05 | 0.174668152  | 0.124 |
| Vps35         | 4.40E-05 | 0.0912104    | 0.154 |

|               |          |              |       |
|---------------|----------|--------------|-------|
| Rpsa          | 4.41E-05 | 0.163150746  | 0.089 |
| Itsn2         | 4.50E-05 | 0.148933106  | 0.094 |
| Zwint         | 4.67E-05 | -0.279966587 | 0.077 |
| I7Rn6         | 4.67E-05 | -0.268499193 | 0.073 |
| Atp5o         | 4.68E-05 | -0.189958331 | 0.312 |
| S100a11       | 4.70E-05 | -0.343884109 | 0.103 |
| Sh3bgrl       | 4.75E-05 | 0.147573847  | 0.191 |
| Ccdc88a       | 4.77E-05 | 0.146751239  | 0.057 |
| Stoml2        | 4.86E-05 | -0.255246765 | 0.06  |
| Myg1          | 4.96E-05 | -0.217291628 | 0.031 |
| Arhgef28      | 5.00E-05 | 0.104107221  | 0.06  |
| Lpcat3        | 5.04E-05 | -0.165518307 | 0.043 |
| Aldh9a1       | 5.04E-05 | -0.25658152  | 0.121 |
| Mpzl1         | 5.05E-05 | 0.219709245  | 0.112 |
| Gm9843        | 5.17E-05 | 0.162419018  | 0.154 |
| Mrpl16        | 5.26E-05 | -0.197225653 | 0.03  |
| Ndufb4        | 5.34E-05 | 0.115798919  | 0.11  |
| Tmem19        | 5.36E-05 | 0.014755697  | 0.087 |
| Uqcrh         | 5.59E-05 | -0.147216163 | 0.312 |
| Enpp5         | 5.70E-05 | -0.281190052 | 0.067 |
| Rnf41         | 5.88E-05 | 0.060706017  | 0.054 |
| Oxa1l         | 5.93E-05 | -0.166159368 | 0.053 |
| Rilpl2        | 5.94E-05 | -0.228624124 | 0.041 |
| Twf1          | 6.06E-05 | -0.226337098 | 0.083 |
| Jtb           | 6.09E-05 | -0.244621522 | 0.102 |
| Tax1bp3       | 6.16E-05 | -0.199307014 | 0.036 |
| Fam168a       | 6.19E-05 | 0.097525375  | 0.161 |
| Zfp664        | 6.29E-05 | 0.07855681   | 0.102 |
| Phc2          | 6.38E-05 | 0.103013425  | 0.059 |
| Gtdc1         | 6.47E-05 | -0.293686197 | 0.032 |
| Ano6          | 6.50E-05 | 0.083224795  | 0.072 |
| Fgl2          | 6.66E-05 | -0.481950821 | 0.058 |
| Sigmar1       | 6.69E-05 | 0.069087326  | 0.052 |
| Rnf10         | 6.77E-05 | 0.056495615  | 0.118 |
| Mob2          | 6.88E-05 | 0.079067272  | 0.059 |
| Uba5          | 6.90E-05 | -0.239873466 | 0.086 |
| Pip4k2c       | 7.02E-05 | 0.13330052   | 0.059 |
| Tsnax         | 7.11E-05 | 0.07284185   | 0.129 |
| 1110008P14Rik | 7.27E-05 | -0.142003729 | 0.076 |
| Tacc2         | 7.28E-05 | 0.070141667  | 0.113 |
| Hsd17b11      | 7.34E-05 | -0.197877752 | 0.183 |
| Gamt          | 7.73E-05 | 0.128616855  | 0.216 |
| Erbp2ip       | 7.96E-05 | 0.122782809  | 0.076 |

|               |             |              |       |
|---------------|-------------|--------------|-------|
| Chchd6        | 8.00E-05    | -0.181292515 | 0.032 |
| D17Wsu104e    | 8.00E-05    | -0.277891615 | 0.109 |
| Gtf2i         | 8.00E-05    | -0.208358377 | 0.102 |
| Dpm3          | 8.06E-05    | -0.165816138 | 0.091 |
| Eif2s2        | 8.10E-05    | 0.118156741  | 0.171 |
| Rbck1         | 8.15E-05    | 0.075063567  | 0.081 |
| Tceb2         | 8.16E-05    | 0.159981425  | 0.329 |
| Ppp1r10       | 8.18E-05    | 0.120567953  | 0.056 |
| Mrpl13        | 8.24E-05    | -0.240466701 | 0.139 |
| Luc7l         | 8.35E-05    | 0.120926251  | 0.088 |
| Asap1         | 8.44E-05    | 0.131431777  | 0.052 |
| Gclm          | 8.45E-05    | 0.102295828  | 0.102 |
| Cdc26         | 8.50E-05    | -0.21589807  | 0.038 |
| Emp2          | 8.50E-05    | -0.147667065 | 0.476 |
| Lsm4          | 8.70E-05    | -0.196409125 | 0.112 |
| Edem2         | 8.97E-05    | 0.072777203  | 0.054 |
| Zzz3          | 9.01E-05    | 0.038590768  | 0.063 |
| Tex264        | 9.15E-05    | -0.241099364 | 0.116 |
| Psm1          | 9.40E-05    | -0.22475248  | 0.131 |
| Tsc22d4       | 9.41E-05    | 0.111753557  | 0.683 |
| Colgalt1      | 9.42E-05    | 0.076701121  | 0.062 |
| Serinc3       | 9.45E-05    | -0.259100927 | 0.139 |
| Ndufa1        | 9.52E-05    | -0.193020867 | 0.128 |
| Nhp2          | 9.95E-05    | -0.191351233 | 0.046 |
| Slc35a5       | 9.96E-05    | 0.130666279  | 0.068 |
| Tia1          | 0.000101937 | 0.099397564  | 0.088 |
| 4933434E20Rik | 0.000102416 | 0.10012495   | 0.084 |
| Bex2          | 0.000103082 | -0.176954523 | 0.044 |
| Brd7          | 0.000103735 | 0.067461945  | 0.08  |
| Ptma          | 0.000103767 | 0.148509761  | 0.151 |
| Cpne3         | 0.000104584 | -0.190787074 | 0.112 |
| Txndc12       | 0.000104758 | -0.282655897 | 0.065 |
| Sema3g        | 0.000105026 | 0.105760042  | 0.051 |
| Thy1          | 0.000108035 | -0.227463089 | 0.038 |
| Psm3          | 0.000108183 | -0.225931767 | 0.162 |
| 3830406C13Rik | 0.000108684 | 0.044477384  | 0.07  |
| Hypk          | 0.000110185 | 0.073977454  | 0.102 |
| Cnih4         | 0.000110308 | 0.082514927  | 0.128 |
| Rnf20         | 0.000111092 | 0.120299485  | 0.09  |
| Emc8          | 0.000111461 | -0.231684844 | 0.065 |
| Tmem41b       | 0.000111989 | 0.113412999  | 0.066 |
| Rpl29         | 0.000112884 | 0.158285662  | 0.159 |
| Adrm1         | 0.000115261 | 0.093387628  | 0.106 |

|               |             |              |       |
|---------------|-------------|--------------|-------|
| Degs1         | 0.000117464 | 0.135130094  | 0.241 |
| Snapc5        | 0.00011976  | -0.223050372 | 0.093 |
| Dnajb11       | 0.000120972 | -0.22195983  | 0.085 |
| Cct3          | 0.000121274 | -0.211903809 | 0.115 |
| 1810009A15Rik | 0.000121316 | -0.154592355 | 0.068 |
| Fis1          | 0.000121786 | -0.168673764 | 0.277 |
| Bcap29        | 0.000125291 | 0.058474308  | 0.073 |
| Ivd           | 0.00012761  | 0.103473441  | 0.075 |
| Mrps16        | 0.000129796 | -0.220826582 | 0.075 |
| Mta2          | 0.000131462 | 0.063736195  | 0.057 |
| Thrap3        | 0.000134042 | 0.07817815   | 0.134 |
| Gm10076       | 0.000136512 | 0.189743928  | 0.157 |
| Fdft1         | 0.000137684 | 0.181232629  | 0.227 |
| Dnaja2        | 0.000138899 | -0.203360889 | 0.115 |
| Kif3a         | 0.000141348 | 0.131215949  | 0.146 |
| Decr1         | 0.000141836 | -0.190909212 | 0.048 |
| Eif4g2        | 0.000143449 | -0.219143234 | 0.219 |
| Rsrc2         | 0.000144579 | 0.108649282  | 0.183 |
| Vegfb         | 0.000146291 | -0.149182521 | 0.032 |
| Pafah1b1      | 0.000146322 | 0.069626003  | 0.22  |
| Dnajb12       | 0.000147828 | 0.170427608  | 0.115 |
| Ii10rb        | 0.000148322 | 0.027382851  | 0.099 |
| Cdv3          | 0.000149971 | 0.096340227  | 0.062 |
| Fam216a       | 0.000150822 | -0.199931318 | 0.031 |
| Fip1l1        | 0.000150962 | 0.118096457  | 0.097 |
| Col5a1        | 0.000150971 | 0.00081344   | 0.052 |
| Fam162a       | 0.000153488 | -0.264360099 | 0.09  |
| Becn1         | 0.000154103 | -0.24441312  | 0.087 |
| Stat1         | 0.000157122 | -0.260339588 | 0.078 |
| Sdccag3       | 0.000162623 | 0.059503485  | 0.07  |
| Ube3a         | 0.00016291  | 0.093501091  | 0.095 |
| Dnajb9        | 0.00016673  | -0.226103279 | 0.044 |
| Metap1d       | 0.000168473 | 0.114124121  | 0.086 |
| Bcl7b         | 0.000170034 | 0.070610442  | 0.087 |
| Med19         | 0.000170059 | -0.213990235 | 0.073 |
| Nsmf          | 0.000173833 | 0.114722446  | 0.072 |
| Nubp2         | 0.000179569 | -0.214219392 | 0.032 |
| Ube2f         | 0.000184369 | 0.026067217  | 0.06  |
| Cyth3         | 0.00018559  | -0.181752252 | 0.039 |
| Arcp2         | 0.00018619  | 0.094627215  | 0.416 |
| Atraid        | 0.000190355 | -0.224667639 | 0.214 |
| Tor1aip1      | 0.000195834 | -0.241816903 | 0.078 |
| Frmd8         | 0.000204056 | 0.061919066  | 0.078 |



|               |             |              |       |
|---------------|-------------|--------------|-------|
| Spns1         | 0.000205405 | 0.100846456  | 0.058 |
| Trp53         | 0.000207246 | -0.230711318 | 0.047 |
| Rala          | 0.000207391 | 0.103877291  | 0.177 |
| Opa1          | 0.000208564 | 0.064936866  | 0.053 |
| Spire1        | 0.000209185 | 0.087470081  | 0.07  |
| Rpl35a        | 0.000209706 | 0.190578896  | 0.198 |
| Casp8ap2      | 0.000211792 | 0.09438952   | 0.051 |
| Alg5          | 0.000213052 | -0.171627549 | 0.036 |
| Ginm1         | 0.000213831 | -0.237389719 | 0.088 |
| Arhgap39      | 0.000214747 | 0.13752952   | 0.06  |
| Yme1l1        | 0.000214798 | 0.123063829  | 0.084 |
| Thap3         | 0.000216704 | 0.105697234  | 0.062 |
| Arf1          | 0.000218781 | -0.199416965 | 0.189 |
| 1500011K16Rik | 0.000220709 | -0.209261621 | 0.122 |
| Aga           | 0.000227811 | 0.07211474   | 0.082 |
| Cox7c         | 0.000228816 | 0.209662089  | 0.155 |
| Sec14l1       | 0.000230237 | 0.140978307  | 0.082 |
| Hspe1         | 0.000233907 | -0.196537013 | 0.173 |
| Fam134b       | 0.000234059 | -0.229050365 | 0.195 |
| Pcbd2         | 0.000242793 | -0.197195054 | 0.039 |
| Sarnp         | 0.000247792 | -0.20813896  | 0.08  |
| Ap4s1         | 0.000253057 | 0.082347356  | 0.102 |
| Dync1li2      | 0.000256364 | 0.142011762  | 0.13  |
| Med31         | 0.000257798 | -0.177357069 | 0.06  |
| Zkscan3       | 0.00025998  | 0.127352594  | 0.085 |
| Gm16286       | 0.000261774 | 0.12287665   | 0.066 |
| Iws1          | 0.000267673 | 0.055121725  | 0.066 |
| Wipi2         | 0.000273683 | 0.049431108  | 0.059 |
| Ier2          | 0.000273705 | 0.064842076  | 0.066 |
| Pak1ip1       | 0.000275501 | -0.222220657 | 0.088 |
| Farsb         | 0.000277035 | 0.076666421  | 0.052 |
| Tsen34        | 0.000279646 | -0.203514394 | 0.129 |
| Pcm1          | 0.000282188 | 0.175262215  | 0.139 |
| Srp19         | 0.000283968 | 0.050060268  | 0.154 |
| Cnot2         | 0.000286134 | 0.088420415  | 0.077 |
| Tfg           | 0.000288933 | 0.052246591  | 0.099 |
| Derl2         | 0.000291737 | -0.19647207  | 0.046 |
| Mettl23       | 0.000295117 | 0.10043228   | 0.099 |
| Scpep1        | 0.000297028 | -0.222957093 | 0.043 |
| Ssu72         | 0.000306366 | -0.155039787 | 0.098 |
| Msl1          | 0.000313492 | 0.065105441  | 0.094 |
| Atp5j         | 0.000314201 | -0.144979372 | 0.359 |
| Mrps34        | 0.000318778 | -0.223628456 | 0.064 |

|               |             |              |       |
|---------------|-------------|--------------|-------|
| Uqcrq         | 0.00031932  | -0.156771953 | 0.286 |
| Dennd5a       | 0.000323845 | -0.221449702 | 0.046 |
| Ccndbp1       | 0.000340241 | 0.105199841  | 0.08  |
| Dync1h1       | 0.000340578 | 0.103379432  | 0.084 |
| U2surp        | 0.000344304 | 0.143789826  | 0.143 |
| Vps28         | 0.000344785 | 0.117479466  | 0.216 |
| Ppp1r15b      | 0.000345462 | 0.079460583  | 0.066 |
| Nxt2          | 0.00034559  | 0.041547075  | 0.07  |
| Ptpn11        | 0.000350744 | 0.134134434  | 0.119 |
| Mrpl48        | 0.000360613 | -0.215652031 | 0.087 |
| Tln1          | 0.00036332  | 0.047200368  | 0.164 |
| Rps15a        | 0.000363604 | 0.109269173  | 0.312 |
| Gpi1          | 0.000365285 | -0.126264355 | 0.091 |
| Smim15        | 0.000366011 | -0.189170487 | 0.086 |
| Scnm1         | 0.000366186 | 0.07214308   | 0.084 |
| Spcs3         | 0.000368328 | 0.150672817  | 0.06  |
| Actr1a        | 0.000370351 | 0.075046836  | 0.103 |
| Sirpa         | 0.000370636 | 0.07482717   | 0.062 |
| Mpp5          | 0.000371471 | 0.07438456   | 0.075 |
| Mrpl33        | 0.000373026 | 0.085644141  | 0.167 |
| Zfp91         | 0.000379552 | 0.063328192  | 0.227 |
| Maged1        | 0.000383499 | -0.191635673 | 0.184 |
| Etfa          | 0.000386015 | -0.211567284 | 0.132 |
| Ide           | 0.00038853  | -0.197764651 | 0.045 |
| Hnrnpu        | 0.000390057 | 0.078938     | 0.369 |
| Smarcc1       | 0.000393943 | 0.141199428  | 0.083 |
| Cacybp        | 0.000395529 | -0.242089205 | 0.138 |
| Sspn          | 0.000397714 | -0.25270096  | 0.054 |
| Exosc4        | 0.000399579 | -0.201818413 | 0.036 |
| 1110059G10Rik | 0.000403708 | -0.202421591 | 0.033 |
| Ap3m1         | 0.000409271 | -0.262611945 | 0.046 |
| Ssfa2         | 0.000412124 | 0.060225881  | 0.12  |
| Scrn1         | 0.000415141 | 0.047012377  | 0.099 |
| Dnajb6        | 0.000416841 | 0.135807228  | 0.079 |
| Sptan1        | 0.000416955 | 0.076829277  | 0.121 |
| Fubp3         | 0.000419225 | 0.139619135  | 0.06  |
| Eea1          | 0.000424068 | 0.081349898  | 0.072 |
| 2610001J05Rik | 0.00043462  | -0.265834119 | 0.121 |
| Rps3a1        | 0.000440601 | 0.087548454  | 0.407 |
| Tpgs2         | 0.000444235 | -0.17387833  | 0.032 |
| Sdhaf2        | 0.00044821  | -0.132833196 | 0.032 |
| Lonp2         | 0.000450529 | -0.196983871 | 0.063 |
| Mrpl4         | 0.000453446 | -0.179866966 | 0.053 |

|               |             |              |       |
|---------------|-------------|--------------|-------|
| Med21         | 0.00045362  | -0.17198124  | 0.09  |
| Hmgn2         | 0.000454264 | 0.147157736  | 0.084 |
| Parp3         | 0.000455972 | -0.260021618 | 0.044 |
| Pam           | 0.00046054  | -0.209274456 | 0.145 |
| As3mt         | 0.000460699 | -0.208577929 | 0.045 |
| Snapin        | 0.000470424 | 0.083265826  | 0.144 |
| Sgcb          | 0.000481498 | 0.063728807  | 0.203 |
| Acat2         | 0.000482638 | -0.176532982 | 0.054 |
| Lrrc58        | 0.000493096 | 0.07142686   | 0.162 |
| Gm26924       | 0.000495893 | -0.200303555 | 0.107 |
| Ndufa2        | 0.000498687 | -0.140664593 | 0.231 |
| Arhgap17      | 0.000503735 | 0.057065866  | 0.052 |
| Ptprs         | 0.000506966 | 0.134432322  | 0.087 |
| Adss          | 0.000519997 | 0.060082804  | 0.052 |
| Cfdp1         | 0.000522303 | -0.217585366 | 0.124 |
| Ankrd46       | 0.000523959 | 0.002912643  | 0.103 |
| Thoc7         | 0.000526871 | -0.230251742 | 0.08  |
| Hspa8         | 0.000534227 | 0.116185853  | 0.31  |
| Zmynd11       | 0.000534692 | -0.214636186 | 0.165 |
| Anxa6         | 0.000536914 | -0.219580659 | 0.097 |
| Rogdi         | 0.000544282 | 0.14495346   | 0.057 |
| N6amt1        | 0.000551216 | -0.205920075 | 0.041 |
| Ip6k1         | 0.00055983  | 0.025887686  | 0.103 |
| Klhl9         | 0.000565352 | -0.20668383  | 0.043 |
| Tpst1         | 0.000570354 | 0.018832007  | 0.064 |
| Ube2e3        | 0.000571997 | 0.097836427  | 0.152 |
| Phf14         | 0.00058909  | 0.087522858  | 0.079 |
| A830082K12Rik | 0.000589327 | -0.16791366  | 0.033 |
| Limd1         | 0.000600727 | -0.23690147  | 0.039 |
| Tmco1         | 0.000601607 | -0.241398203 | 0.137 |
| Klc1          | 0.00060383  | 0.031537882  | 0.231 |
| Npc2          | 0.000610713 | 0.083749375  | 0.383 |
| Psmc12        | 0.000625011 | -0.195765386 | 0.096 |
| Emg1          | 0.000625166 | -0.18395927  | 0.061 |
| Prdx3         | 0.000629321 | -0.172244269 | 0.049 |
| Tprgl         | 0.000629968 | 0.067792315  | 0.23  |
| Rps19         | 0.000643925 | 0.147549725  | 0.313 |
| Meaf6         | 0.000646251 | 0.122757249  | 0.053 |
| Gapvd1        | 0.00065419  | 0.083614043  | 0.065 |
| Prkcsh        | 0.000665868 | -0.180587417 | 0.068 |
| Sox2ot        | 0.000688375 | 0.122018749  | 0.109 |
| Fcgrt         | 0.000689788 | 0.093964673  | 0.157 |
| Ndufb5        | 0.000695471 | -0.172203612 | 0.2   |

|               |             |              |       |
|---------------|-------------|--------------|-------|
| Atp6v0e2      | 0.00069955  | 0.094282384  | 0.196 |
| PsmA6         | 0.000707706 | -0.222782685 | 0.179 |
| Usp34         | 0.000709    | 0.083779278  | 0.076 |
| Dnpep         | 0.000724195 | -0.175428418 | 0.054 |
| Rdx           | 0.000726374 | 0.069644103  | 0.242 |
| Rpl5          | 0.000729962 | 0.051992992  | 0.059 |
| Ckap5         | 0.000731851 | -0.16972552  | 0.065 |
| 2510003E04Rik | 0.000745206 | 0.09410354   | 0.094 |
| Dnajc9        | 0.000745499 | -0.168113677 | 0.062 |
| Brd2          | 0.000747927 | 0.063082353  | 0.155 |
| Wac           | 0.000772641 | 0.104855989  | 0.075 |
| Pdha1         | 0.000775394 | -0.204736815 | 0.119 |
| Mrps33        | 0.000779657 | 0.189047974  | 0.103 |
| Chadl         | 0.000783366 | -0.179380344 | 0.042 |
| Smim11        | 0.000786683 | -0.20918085  | 0.103 |
| Prpf19        | 0.000793818 | -0.222183667 | 0.081 |
| Sra1          | 0.000801943 | -0.222177011 | 0.082 |
| Myl12b        | 0.000820994 | -0.201452166 | 0.234 |
| Kdm5a         | 0.000825621 | 0.038255865  | 0.091 |
| Syt4          | 0.000825991 | -0.326295295 | 0.035 |
| Ddx3x         | 0.000828584 | 0.102011345  | 0.165 |
| Ahi1          | 0.00084155  | 0.01379309   | 0.108 |
| Ddost         | 0.00084674  | -0.195333394 | 0.136 |
| Polr2d        | 0.000859727 | -0.200579202 | 0.048 |
| Rpl6          | 0.000867531 | 0.086767335  | 0.256 |
| Ddhd1         | 0.00087229  | -0.19552681  | 0.054 |
| Pepd          | 0.000875598 | -0.157087673 | 0.044 |
| Ndufa5        | 0.000887519 | 0.110796205  | 0.214 |
| Srp14         | 0.000890617 | 0.088048766  | 0.338 |
| Ncbp2         | 0.000901315 | -0.248004275 | 0.074 |
| Vapa          | 0.000910811 | -0.19008694  | 0.207 |
| Apopt1        | 0.000924929 | 0.115031995  | 0.082 |
| Nde1          | 0.000931268 | 0.073984556  | 0.096 |
| Polr2b        | 0.000941495 | -0.161200365 | 0.032 |
| Prph          | 0.000956867 | -0.193908669 | 0.108 |
| D8ErtD738e    | 0.000970347 | -0.192300658 | 0.225 |
| Cdk5rap3      | 0.000974959 | -0.242582504 | 0.034 |
| Rab1          | 0.000989526 | -0.169098835 | 0.169 |
| Pak2          | 0.000994576 | 0.070016991  | 0.165 |
| Plxnb3        | 0.001023372 | 0.129538329  | 0.058 |
| Tomm22        | 0.001026652 | -0.186133595 | 0.129 |
| Egln1         | 0.001028365 | 0.030423358  | 0.054 |
| Rnf5          | 0.001037203 | 0.114442873  | 0.259 |

|          |             |              |       |
|----------|-------------|--------------|-------|
| Agap1    | 0.001071806 | -0.231962795 | 0.042 |
| Mettl9   | 0.001081197 | -0.245591541 | 0.139 |
| Rhbdf1   | 0.001100166 | -0.224565746 | 0.047 |
| Prorsd1  | 0.001100313 | -0.1381625   | 0.037 |
| Rpl23    | 0.001106428 | 0.154622896  | 0.222 |
| Atp6v1g1 | 0.001115795 | -0.202239158 | 0.22  |
| Golga2   | 0.00112225  | 0.032249777  | 0.058 |
| Fam114a2 | 0.001122833 | 0.055289107  | 0.075 |
| Vezf1    | 0.001123201 | -0.225229206 | 0.106 |
| Aes      | 0.001129252 | -0.180674279 | 0.086 |
| Mbtps1   | 0.001154012 | 0.050342204  | 0.056 |
| Napa     | 0.001171466 | -0.157299431 | 0.099 |
| Mrpl45   | 0.001178179 | -0.130946695 | 0.039 |
| Ywhae    | 0.001180294 | 0.120775212  | 0.364 |
| Agrn     | 0.001181145 | 0.057217712  | 0.07  |
| Huwe1    | 0.001183923 | 0.073054827  | 0.059 |
| Psmc5    | 0.00121009  | 0.129398977  | 0.168 |
| Surf4    | 0.001236894 | -0.223377098 | 0.076 |
| Dnajc24  | 0.001246485 | -0.191076616 | 0.041 |
| Smc1a    | 0.001279249 | -0.202420549 | 0.137 |
| Cpsf7    | 0.001285972 | 0.092402131  | 0.063 |
| Chchd3   | 0.001286803 | -0.231773071 | 0.114 |
| Btd      | 0.001306243 | -0.194726767 | 0.05  |
| P4hb     | 0.001330895 | -0.237887142 | 0.214 |
| Atp5f1   | 0.00133455  | -0.162464626 | 0.302 |
| Anln     | 0.001338315 | -0.193114382 | 0.042 |
| Mrps25   | 0.001338817 | -0.220206545 | 0.065 |
| Zranb1   | 0.001350661 | 0.030852605  | 0.057 |
| Chtop    | 0.00135861  | 0.097357316  | 0.106 |
| Eny2     | 0.001362893 | -0.163700624 | 0.078 |
| Tanc2    | 0.001364867 | 0.094845525  | 0.051 |
| Calu     | 0.001383591 | -0.236519381 | 0.111 |
| Arhgef10 | 0.001392489 | -0.003548389 | 0.125 |
| Tceal1   | 0.001400727 | -0.172737277 | 0.033 |
| Snhg11   | 0.00141588  | -0.195049698 | 0.035 |
| Arpc4    | 0.00143997  | -0.160343979 | 0.085 |
| Dhx9     | 0.001447885 | -0.181481707 | 0.049 |
| Chpt1    | 0.001448354 | 0.14689635   | 0.158 |
| Arhgdia  | 0.001465319 | 0.055182599  | 0.24  |
| Rps6kb1  | 0.001473963 | 0.102574453  | 0.069 |
| Spr      | 0.001490928 | -0.109190306 | 0.046 |
| Ppp2r2d  | 0.001492074 | 0.057861546  | 0.059 |
| Map4k4   | 0.001492592 | 0.102546376  | 0.178 |

|          |             |              |       |
|----------|-------------|--------------|-------|
| Slc25a51 | 0.001493254 | 0.10106367   | 0.073 |
| Alkbh5   | 0.001500527 | 0.070260963  | 0.068 |
| Wars     | 0.001501871 | 0.079634429  | 0.057 |
| Akr1a1   | 0.0015138   | -0.157997553 | 0.339 |
| Prex2    | 0.00152643  | -0.331544072 | 0.058 |
| Mrps17   | 0.001537387 | -0.174547787 | 0.077 |
| Med28    | 0.00154013  | -0.209307472 | 0.173 |
| Ccdc127  | 0.001544293 | -0.178385532 | 0.048 |
| Ndufa7   | 0.001554291 | -0.171301679 | 0.25  |
| Eif3b    | 0.001591949 | 0.105834294  | 0.075 |
| Vdac1    | 0.001607674 | -0.189267402 | 0.115 |
| Cwc27    | 0.001640627 | 0.076259761  | 0.054 |
| Timm13   | 0.001650149 | -0.187667829 | 0.221 |
| Pomp     | 0.001660219 | -0.191273013 | 0.195 |
| Rad21    | 0.001667089 | 0.061712458  | 0.178 |
| Atp5g1   | 0.001715097 | 0.144403061  | 0.14  |
| Bet1l    | 0.001719837 | 0.041863593  | 0.076 |
| Tm2d2    | 0.00172133  | -0.247471873 | 0.136 |
| Ccdc47   | 0.001729517 | 0.084327419  | 0.186 |
| Setd3    | 0.00175568  | 0.035924966  | 0.092 |
| Pigp     | 0.001763892 | 0.07965053   | 0.151 |
| Usp16    | 0.001789053 | 0.062053295  | 0.098 |
| Arhgef12 | 0.001799087 | 0.040285804  | 0.085 |
| Nelfb    | 0.001803654 | -0.167916864 | 0.044 |
| Ndufb3   | 0.001814671 | -0.134049986 | 0.173 |
| Srek1    | 0.001816609 | 0.119719844  | 0.075 |
| Rbbp7    | 0.001821112 | -0.224925531 | 0.127 |
| Usf2     | 0.001842644 | 0.094339262  | 0.095 |
| Smc3     | 0.001852867 | -0.233257275 | 0.154 |
| Acp1     | 0.001859558 | 0.140764844  | 0.071 |
| Oxr1     | 0.00187465  | -0.183641242 | 0.058 |
| Fam115a  | 0.001895177 | -0.212596606 | 0.081 |
| Mrpl40   | 0.00189577  | -0.207393008 | 0.07  |
| Rdh5     | 0.001905206 | 0.214602538  | 0.179 |
| Crip2    | 0.001949862 | 0.082201804  | 0.472 |
| Nub1     | 0.001951543 | 0.006373973  | 0.073 |
| Prmt1    | 0.00197155  | 0.055572358  | 0.073 |
| Tsen15   | 0.00198551  | -0.09440396  | 0.036 |
| Tmem55b  | 0.002029629 | 0.080882811  | 0.092 |
| Nucb1    | 0.002035953 | -0.234937106 | 0.082 |
| Eef1b2   | 0.002065265 | -0.142887018 | 0.225 |
| Slc33a1  | 0.002077822 | 0.089473113  | 0.055 |
| Mrpl3    | 0.002082957 | -0.178194757 | 0.051 |

|               |             |              |       |
|---------------|-------------|--------------|-------|
| Ndufb11       | 0.002084386 | -0.143158218 | 0.258 |
| Trappc1       | 0.00209123  | -0.204457827 | 0.067 |
| Smox          | 0.002099921 | 0.116048972  | 0.183 |
| Syncrip       | 0.002134365 | 0.112537609  | 0.086 |
| Stat3         | 0.002151902 | -0.214530108 | 0.048 |
| Slc25a5       | 0.002160955 | -0.143906074 | 0.266 |
| Appl1         | 0.002162075 | 0.05163005   | 0.077 |
| Mrps23        | 0.002193077 | -0.140028192 | 0.044 |
| Vapb          | 0.002201224 | 0.055084686  | 0.103 |
| Lman1         | 0.00220973  | -0.249732934 | 0.109 |
| Txn2          | 0.002216838 | -0.158800157 | 0.088 |
| Copg1         | 0.002217336 | -0.131223623 | 0.038 |
| Dnajc21       | 0.002306617 | 0.051697518  | 0.068 |
| Nfyb          | 0.002308813 | 0.052617468  | 0.057 |
| Nudcd2        | 0.002321874 | 0.08960658   | 0.082 |
| Pigk          | 0.0023278   | 0.093655378  | 0.078 |
| Tbrg1         | 0.002385774 | -0.242463038 | 0.085 |
| Cln5          | 0.002391731 | 0.050072902  | 0.053 |
| Higd1a        | 0.002423174 | -0.13531431  | 0.062 |
| Itpa          | 0.002433726 | -0.207200785 | 0.058 |
| Ralb          | 0.002454564 | -0.125256659 | 0.042 |
| Cdkn2d        | 0.002489692 | 0.022497516  | 0.081 |
| Tmed2         | 0.002490549 | 0.119306784  | 0.114 |
| mt-Nd6        | 0.002524027 | -0.18025962  | 0.072 |
| Psmc5         | 0.002529081 | -0.167319755 | 0.14  |
| Mpc1          | 0.002577043 | 0.103060254  | 0.094 |
| Nr3c1         | 0.002589422 | -0.056313605 | 0.17  |
| Syn3          | 0.002590694 | -0.180941532 | 0.158 |
| Bag6          | 0.002596483 | 0.057830009  | 0.069 |
| Nipa1         | 0.00260066  | 0.113143305  | 0.054 |
| Oaz2          | 0.002605411 | -0.142397613 | 0.062 |
| Psmc4         | 0.002619279 | -0.196180878 | 0.103 |
| Znhit1        | 0.002629933 | 0.055875762  | 0.073 |
| Nenf          | 0.002664074 | -0.189767941 | 0.255 |
| Trio          | 0.002664612 | 0.11132076   | 0.073 |
| 4632419I22Rik | 0.002672357 | -0.180588439 | 0.035 |
| Ndufa11       | 0.002685036 | -0.126955263 | 0.217 |
| Copb2         | 0.00271146  | -0.178183156 | 0.081 |
| Tnks2         | 0.002716786 | 0.094006549  | 0.054 |
| Tmem160       | 0.002779431 | -0.214646233 | 0.127 |
| Ctcf          | 0.0027856   | 0.119522717  | 0.14  |
| Crebrf        | 0.002801572 | 0.078211622  | 0.057 |
| Akap11        | 0.002827188 | 0.01929215   | 0.063 |



|          |             |              |       |
|----------|-------------|--------------|-------|
| Erlec1   | 0.00292748  | -0.141737609 | 0.067 |
| Ndrq4    | 0.002946098 | -0.16352156  | 0.075 |
| Qdpr     | 0.002994545 | -0.194984246 | 0.108 |
| Med30    | 0.003038249 | 0.07719271   | 0.106 |
| Lsm1     | 0.003063864 | -0.24246393  | 0.057 |
| Ddx39b   | 0.003134399 | 0.034230518  | 0.126 |
| Mnat1    | 0.003136323 | 0.021057989  | 0.059 |
| Sdf4     | 0.003149309 | -0.146225206 | 0.219 |
| Pitpnb   | 0.003200911 | 0.139961162  | 0.091 |
| Timm21   | 0.003225567 | 0.041511451  | 0.057 |
| Dynlrb1  | 0.003232777 | 0.036722836  | 0.402 |
| Cirbp    | 0.003233378 | 0.012484671  | 0.093 |
| Stx8     | 0.003257397 | -0.162231903 | 0.063 |
| Arl2bp   | 0.003263628 | 0.076553156  | 0.118 |
| Nsmce2   | 0.003269318 | -0.131945786 | 0.051 |
| Gatc     | 0.003291877 | 0.057805529  | 0.065 |
| Pex2     | 0.00329362  | -0.225589862 | 0.08  |
| Hmg20b   | 0.003297232 | 0.125740195  | 0.159 |
| Fbxo6    | 0.003343905 | 0.004185744  | 0.054 |
| Aasdhppt | 0.003372879 | 0.122450933  | 0.06  |
| Kdelr1   | 0.00338019  | -0.186998473 | 0.078 |
| Slc27a1  | 0.003387406 | -0.158186109 | 0.139 |
| RbmX     | 0.003429456 | -0.138724896 | 0.048 |
| Bfar     | 0.003465641 | -0.186144444 | 0.052 |
| Tmem106b | 0.003470057 | -0.022907435 | 0.111 |
| Dirc2    | 0.003482039 | -0.220802902 | 0.056 |
| Rpl31    | 0.003548176 | 0.075839842  | 0.057 |
| Dda1     | 0.003554449 | 0.060768442  | 0.094 |
| Hadhb    | 0.003562603 | 0.137023686  | 0.106 |
| Flot1    | 0.003585754 | 0.036301913  | 0.136 |
| Gins4    | 0.003588411 | 0.024560644  | 0.056 |
| Ncln     | 0.003616652 | 0.065366962  | 0.054 |
| Aldh7a1  | 0.003668757 | -0.198485366 | 0.072 |
| Dcps     | 0.003681415 | -0.155724177 | 0.035 |
| Fmr1     | 0.00368942  | 0.125813689  | 0.078 |
| Smc4     | 0.003690235 | 0.05154913   | 0.085 |
| Hsp90aa1 | 0.003705274 | 0.119389964  | 0.314 |
| Wapal    | 0.003710877 | 0.123917003  | 0.063 |
| Zfp397   | 0.003756468 | -0.113261133 | 0.046 |
| Zbtb4    | 0.003783646 | -0.198403951 | 0.04  |
| Fmnl2    | 0.003784223 | 0.097143539  | 0.178 |
| Wash     | 0.003822865 | 0.063043727  | 0.065 |
| Fam103a1 | 0.003836904 | 0.030774742  | 0.074 |

|               |             |              |       |
|---------------|-------------|--------------|-------|
| Mrps31        | 0.003924089 | 0.052909667  | 0.062 |
| Ndufb8        | 0.003972839 | -0.132823906 | 0.268 |
| Fam92a        | 0.003998243 | -0.125998669 | 0.059 |
| Add1          | 0.004009339 | 0.060403031  | 0.154 |
| Zfp608        | 0.004035078 | 0.111023308  | 0.078 |
| Agtrap        | 0.004044912 | -0.144933936 | 0.043 |
| Diablo        | 0.004119395 | -0.156966129 | 0.101 |
| Plgrkt        | 0.004124939 | -0.190327091 | 0.053 |
| 2010111I01Rik | 0.004126245 | 0.142358291  | 0.105 |
| Htatsf1       | 0.004179038 | -0.170644181 | 0.134 |
| Paqr6         | 0.004219228 | -0.162703845 | 0.214 |
| Rcn1          | 0.004222815 | -0.168533995 | 0.19  |
| Aamdc         | 0.004223576 | -0.203270815 | 0.092 |
| Copb1         | 0.004270022 | -0.165851699 | 0.099 |
| Rpl11         | 0.004279898 | 0.111027592  | 0.068 |
| Pik3r1        | 0.004315789 | -0.22443922  | 0.165 |
| BC056474      | 0.004320879 | 0.099702936  | 0.063 |
| Tusc3         | 0.004326044 | 0.051142874  | 0.119 |
| Stip1         | 0.004331313 | -0.131775056 | 0.09  |
| Larp7         | 0.004332608 | 0.04991257   | 0.091 |
| Bola2         | 0.004386294 | 0.07384416   | 0.097 |
| 1110057K04Rik | 0.004436895 | 0.018244018  | 0.07  |
| Gadd45gip1    | 0.004448708 | -0.178469086 | 0.06  |
| Ppp3cb        | 0.004471985 | 0.045929354  | 0.065 |
| Lman2         | 0.004481394 | -0.219453136 | 0.057 |
| Tom1l2        | 0.004507368 | 0.120960727  | 0.053 |
| Ccdc90b       | 0.004508801 | -0.232545072 | 0.066 |
| Dstn          | 0.004520056 | -0.223942995 | 0.152 |
| Kif2a         | 0.004534332 | 0.047030709  | 0.065 |
| Kdelr2        | 0.004559601 | -0.216308932 | 0.088 |
| Anapc11       | 0.004568066 | 0.080396625  | 0.244 |
| Smarcd1       | 0.004637948 | 0.06334405   | 0.056 |
| Fam63b        | 0.004639111 | 0.141955176  | 0.083 |
| Eef1a1        | 0.004639211 | 0.074318983  | 0.647 |
| Fam192a       | 0.004662907 | -0.159539442 | 0.062 |
| Tmem5         | 0.004676063 | -0.193900066 | 0.066 |
| Mrps12        | 0.004676338 | 0.078040923  | 0.148 |
| Elf2          | 0.004680135 | -0.191531826 | 0.041 |
| Uchl5         | 0.004725144 | 0.05499938   | 0.069 |
| Sod2          | 0.004728252 | -0.19773875  | 0.134 |
| Sumo3         | 0.004748002 | -0.138923334 | 0.075 |
| Fam3a         | 0.004767344 | 0.027481848  | 0.067 |
| Tmem59        | 0.004851539 | -0.128801617 | 0.375 |

|          |             |              |       |
|----------|-------------|--------------|-------|
| Tomm20   | 0.004868164 | 0.049315061  | 0.084 |
| Safb     | 0.004876896 | 0.000165638  | 0.133 |
| Ngrn     | 0.004886033 | -0.115128717 | 0.04  |
| Cct2     | 0.004922641 | 0.000153331  | 0.143 |
| Eri3     | 0.004927802 | 0.034592193  | 0.054 |
| Uqcrc1   | 0.004934273 | -0.169175336 | 0.158 |
| Dpysl2   | 0.004984429 | -0.004288489 | 0.144 |
| Xbp1     | 0.00501237  | -0.208456897 | 0.088 |
| Rab2b    | 0.005013301 | 0.046773502  | 0.058 |
| Dtnbp1   | 0.005028014 | 0.056706518  | 0.051 |
| Uqcrfs1  | 0.005041345 | -0.117616933 | 0.148 |
| Mprip    | 0.005064375 | 0.035829699  | 0.107 |
| Ptdss1   | 0.005073722 | 0.103279278  | 0.084 |
| Trim35   | 0.005077379 | -0.177068474 | 0.042 |
| Rheb     | 0.005088653 | 0.056022405  | 0.211 |
| Stampb   | 0.005095654 | 0.037302192  | 0.06  |
| Ptpn13   | 0.005131478 | -0.149635466 | 0.056 |
| Golph3   | 0.005222846 | 0.077365042  | 0.097 |
| Ikzf5    | 0.005261087 | 0.052573803  | 0.051 |
| Rer1     | 0.005267916 | 0.083649618  | 0.232 |
| Cox19    | 0.005320479 | -0.102195524 | 0.039 |
| Mboat7   | 0.005325117 | 0.06883621   | 0.059 |
| Brk1     | 0.005366205 | -0.165292505 | 0.249 |
| Rps7     | 0.005411125 | 0.133891769  | 0.153 |
| Pex7     | 0.005420629 | 0.039524931  | 0.053 |
| Hnrnpul1 | 0.005449483 | 0.084934635  | 0.063 |
| Glr3     | 0.005483777 | 0.037493371  | 0.111 |
| Smpd2    | 0.005634776 | -0.07406025  | 0.052 |
| Hectd1   | 0.005640873 | 0.027899245  | 0.076 |
| Fam198b  | 0.005644083 | -0.15141498  | 0.091 |
| Setd5    | 0.005671825 | 0.069195921  | 0.069 |
| Atp6v1c1 | 0.005716987 | 0.107858421  | 0.087 |
| Hagh     | 0.005764854 | 0.051791001  | 0.099 |
| Chchd7   | 0.005805851 | 0.049045638  | 0.104 |
| Grina    | 0.005847222 | 0.112741827  | 0.167 |
| Actr1b   | 0.005886981 | 0.110678037  | 0.053 |
| Asb8     | 0.00590984  | 0.07711687   | 0.063 |
| Vps4b    | 0.006024675 | 0.063797147  | 0.084 |
| Wbp4     | 0.006053668 | 0.113873543  | 0.141 |
| Ei24     | 0.006076623 | -0.135502272 | 0.055 |
| Spcs1    | 0.006155644 | -0.123889147 | 0.354 |
| Vta1     | 0.006228779 | 0.060254562  | 0.111 |
| Chka     | 0.006526993 | -0.129739735 | 0.039 |

|         |             |              |       |
|---------|-------------|--------------|-------|
| Aamp    | 0.006594654 | 0.117480944  | 0.137 |
| Cebpz   | 0.006685687 | 0.082644857  | 0.076 |
| Rpl34   | 0.006711138 | 0.109600833  | 0.246 |
| Nudt2   | 0.006737485 | -0.154049233 | 0.06  |
| Dmd     | 0.006761521 | -0.19053545  | 0.162 |
| Ppp3r1  | 0.006787075 | 0.08120229   | 0.079 |
| Nras    | 0.00683014  | 0.018775935  | 0.07  |
| Rabl5   | 0.00691881  | -0.111772599 | 0.051 |
| Rb1cc1  | 0.006975867 | 0.053055142  | 0.102 |
| Vps29   | 0.007115416 | 0.048413852  | 0.173 |
| Zcchc24 | 0.007167531 | -0.139068534 | 0.087 |
| H3f3a   | 0.007176729 | -0.119272812 | 0.156 |
| Fam98b  | 0.007302908 | -0.10373491  | 0.048 |
| Ebpl    | 0.007327719 | -0.1203186   | 0.04  |
| Rsu1    | 0.007383658 | -0.196909562 | 0.213 |
| Bmpr1a  | 0.007416035 | -0.164947057 | 0.048 |
| Ppm1a   | 0.007470037 | 0.109989944  | 0.06  |
| Glg1    | 0.007471153 | 0.028952783  | 0.136 |
| Eif3k   | 0.007548675 | -0.176997692 | 0.217 |
| Tpm4    | 0.007651665 | -0.212176984 | 0.136 |
| Ccny    | 0.007680479 | 0.057296376  | 0.053 |
| Romo1   | 0.007742643 | -0.119387713 | 0.126 |
| Uba2    | 0.007790093 | 0.06028724   | 0.093 |
| Ppp4c   | 0.00784445  | -0.213999065 | 0.07  |
| Tmed9   | 0.008049317 | -0.175792362 | 0.157 |
| Gcsh    | 0.008050798 | -0.138352046 | 0.063 |
| Mafg    | 0.008115649 | 0.044095829  | 0.064 |
| Ywhaz   | 0.008166235 | 0.052898704  | 0.302 |
| Stard3  | 0.008190345 | -0.112094938 | 0.071 |
| Tcf25   | 0.00820285  | 0.062897209  | 0.269 |
| Mrpl28  | 0.008240675 | -0.181480958 | 0.096 |
| Snrpd3  | 0.008251056 | -0.212409094 | 0.177 |
| Armcx1  | 0.008293638 | -0.19192213  | 0.042 |
| Schip1  | 0.008358475 | 0.027622421  | 0.147 |
| Arpc5l  | 0.008427231 | -0.184119913 | 0.103 |
| Ggact   | 0.008443614 | -0.140948589 | 0.036 |
| Sntb2   | 0.008517546 | 0.06307678   | 0.054 |
| Timm17a | 0.008524272 | -0.001940957 | 0.116 |
| Pou3f2  | 0.00859109  | -0.077221914 | 0.05  |
| Slc39a1 | 0.008597706 | -0.132460157 | 0.057 |
| Tial1   | 0.008625801 | 0.050723198  | 0.096 |
| Usp48   | 0.008700566 | 0.04653277   | 0.064 |
| Pcmt1   | 0.008703478 | 0.023619419  | 0.177 |

|               |             |              |       |
|---------------|-------------|--------------|-------|
| Rps9          | 0.008760024 | -0.103579749 | 0.597 |
| Gnai2         | 0.008801465 | -0.14806597  | 0.21  |
| Map1b         | 0.008840395 | -0.083208431 | 0.351 |
| Stub1         | 0.008843479 | -0.187849202 | 0.133 |
| Arl6ip5       | 0.008848906 | 0.073216494  | 0.069 |
| Os9           | 0.008884412 | -0.21557467  | 0.152 |
| Aldoa         | 0.008899692 | 0.061109786  | 0.437 |
| Gyg           | 0.008935555 | -0.174586244 | 0.036 |
| Dram2         | 0.009007711 | 0.049571947  | 0.06  |
| Ergic2        | 0.009033045 | 0.078946894  | 0.079 |
| Mrpl35        | 0.009059754 | -0.180363848 | 0.039 |
| Mvb12a        | 0.009156216 | -0.15925788  | 0.039 |
| 1110065P20Rik | 0.009169228 | 0.044789838  | 0.097 |
| Acp2          | 0.00924796  | 0.044934898  | 0.077 |
| Cs            | 0.009287425 | -0.18060901  | 0.119 |
| Med10         | 0.009298111 | -0.163669003 | 0.047 |
| Snrpd2        | 0.009330568 | -0.143134422 | 0.141 |
| Csrp1         | 0.009372589 | -0.024520523 | 0.11  |
| Myo18a        | 0.009394052 | -0.171391742 | 0.054 |
| Lsm3          | 0.009480851 | 0.050552324  | 0.096 |
| Trip11        | 0.009553519 | 0.078773416  | 0.075 |
| Ccnl2         | 0.009609141 | 0.075301989  | 0.084 |
| Uqcrb         | 0.009891839 | -0.153404069 | 0.177 |
| Map1lc3b      | 0.009926651 | 0.034917761  | 0.291 |
| Ppfibp1       | 0.009958137 | -0.141855654 | 0.057 |
| Ier3ip1       | 0.010228079 | -0.185250287 | 0.08  |
| Pcbp1         | 0.010237913 | -0.184119583 | 0.247 |
| Rab8a         | 0.010437738 | -0.252474444 | 0.056 |
| Mau2          | 0.010520117 | 0.061729561  | 0.051 |
| Hp1bp3        | 0.01058049  | 0.015856634  | 0.243 |
| Mdh2          | 0.010615398 | 0.043038305  | 0.272 |
| Cdk7          | 0.010781585 | 0.02923281   | 0.051 |
| Clpp          | 0.01083848  | -0.132752246 | 0.082 |
| Ten1          | 0.010845129 | -0.132243902 | 0.071 |
| Ndufs2        | 0.010889651 | -0.161373858 | 0.141 |
| Raly          | 0.011023165 | -0.205933888 | 0.065 |
| Cyp51         | 0.011037865 | -0.087214221 | 0.208 |
| Hnrnpf        | 0.011145776 | 0.083209941  | 0.107 |
| Nop10         | 0.011336426 | -0.149302231 | 0.147 |
| Hsd17b4       | 0.011426356 | -0.199823645 | 0.091 |
| Ccdc32        | 0.011537048 | -0.129475935 | 0.038 |
| Psm4          | 0.011614691 | -0.180677519 | 0.169 |
| Tpi1          | 0.01162494  | -0.15467279  | 0.231 |

|               |             |              |       |
|---------------|-------------|--------------|-------|
| Rpl36a1       | 0.01162833  | -0.121978934 | 0.127 |
| Apbb1         | 0.011720335 | 0.00842545   | 0.065 |
| Zmym5         | 0.01175309  | 0.068526155  | 0.077 |
| Ppp2r3a       | 0.011756574 | -0.140257059 | 0.055 |
| Emc2          | 0.011776944 | -0.191609642 | 0.105 |
| Dpm2          | 0.011790222 | 0.025489319  | 0.109 |
| Srsf11        | 0.011815111 | 0.050534093  | 0.197 |
| Tppp3         | 0.01184161  | 0.03844026   | 0.367 |
| Srsf1         | 0.011884092 | 0.108097772  | 0.057 |
| Cdk2ap2       | 0.011888618 | 0.085962194  | 0.214 |
| Slk           | 0.011893385 | 0.111093587  | 0.078 |
| Eid1          | 0.011914645 | 0.067457384  | 0.293 |
| Zranb2        | 0.012009523 | 0.113847776  | 0.134 |
| Ebna1bp2      | 0.012072852 | -0.164990032 | 0.088 |
| Zfp326        | 0.01208044  | 0.12470211   | 0.1   |
| Csde1         | 0.012087936 | 0.044662708  | 0.169 |
| Gdi2          | 0.012116067 | -0.182910008 | 0.182 |
| Fbxl15        | 0.012140284 | 0.039250763  | 0.066 |
| Cat           | 0.012277463 | 0.079211076  | 0.202 |
| Tpst2         | 0.012293776 | 0.065384795  | 0.057 |
| Mif4gd        | 0.012339001 | -0.148650417 | 0.051 |
| Col4a3bp      | 0.012403192 | 0.104309882  | 0.053 |
| Vbp1          | 0.012423411 | 0.075488233  | 0.112 |
| Cd99l2        | 0.012459728 | 0.001488099  | 0.131 |
| Emc4          | 0.012662869 | -0.140739587 | 0.088 |
| Ncor1         | 0.0128865   | 0.100179264  | 0.152 |
| Mgea5         | 0.012968276 | 0.068938107  | 0.054 |
| Ankrd26       | 0.013106829 | 0.02729707   | 0.053 |
| Psmb6         | 0.013248711 | -0.123066186 | 0.293 |
| Efcab14       | 0.013265624 | 0.04312927   | 0.072 |
| Tmem242       | 0.013358274 | 0.044025551  | 0.112 |
| Bcap31        | 0.013597122 | -0.167531724 | 0.229 |
| Npm1          | 0.013851574 | 0.082610547  | 0.228 |
| 5830428H23Rik | 0.013907487 | 0.023591234  | 0.062 |
| Eif4b         | 0.013935999 | 0.035708661  | 0.071 |
| Chchd1        | 0.014033778 | -0.228313888 | 0.109 |
| Acox1         | 0.014137431 | -0.188178482 | 0.054 |
| Ctnnd1        | 0.014296748 | -0.030323285 | 0.072 |
| Timm22        | 0.014361702 | -0.138754291 | 0.049 |
| Thoc3         | 0.014519081 | 0.024079354  | 0.053 |
| Rp9           | 0.014665462 | -0.213970306 | 0.099 |
| Slc25a11      | 0.014666644 | -0.183013676 | 0.075 |
| 9530068E07Rik | 0.014793317 | -0.202409659 | 0.18  |

|               |             |              |       |
|---------------|-------------|--------------|-------|
| Pacsin3       | 0.014922159 | 0.023857313  | 0.073 |
| Tmed7         | 0.01495117  | 0.084684471  | 0.093 |
| Ndufs5        | 0.015087345 | 0.122596672  | 0.115 |
| 1110001J03Rik | 0.015115892 | -0.15847951  | 0.133 |
| Ccs           | 0.015217547 | -0.159542715 | 0.073 |
| Fndc4         | 0.015316593 | -0.102460468 | 0.046 |
| Amfr          | 0.015332156 | 0.024843658  | 0.079 |
| Luc7l2        | 0.015540051 | 0.039457599  | 0.167 |
| Bod1          | 0.015548622 | -0.114731888 | 0.043 |
| Suclg1        | 0.015554094 | -0.12673185  | 0.119 |
| Mtdh          | 0.015602139 | -0.113399412 | 0.28  |
| Creg1         | 0.015658433 | -0.169830919 | 0.102 |
| Pum1          | 0.015707422 | 0.063866426  | 0.068 |
| Hepacam       | 0.015749312 | 0.068947363  | 0.137 |
| Tra2a         | 0.015801045 | 0.050482544  | 0.106 |
| Rfc1          | 0.015865777 | 0.072346921  | 0.104 |
| Anks1         | 0.015875547 | 0.036349304  | 0.054 |
| Cd2ap         | 0.015946513 | 0.01764539   | 0.078 |
| Fam188a       | 0.015962067 | 0.0036162    | 0.076 |
| Manbal        | 0.016030022 | 0.036067657  | 0.116 |
| Txn1          | 0.016041792 | -0.201601521 | 0.134 |
| Mrpl34        | 0.016060201 | -0.15677066  | 0.076 |
| Btbd10        | 0.016077492 | 0.043764397  | 0.051 |
| Rest          | 0.016214602 | 0.062364693  | 0.061 |
| Pgrmc2        | 0.016705422 | -0.159837852 | 0.069 |
| Phip          | 0.016947147 | 0.028225547  | 0.075 |
| Acadvl        | 0.016994215 | -0.185607035 | 0.087 |
| Ctsz          | 0.01705245  | -0.180747873 | 0.139 |
| Pnrc2         | 0.017269978 | -0.150429793 | 0.07  |
| Creb3         | 0.017271134 | -0.149856353 | 0.054 |
| Tpd52l2       | 0.017386433 | -0.187774454 | 0.133 |
| Cyb5b         | 0.017412535 | 0.048030929  | 0.082 |
| Golga4        | 0.017486514 | 0.058904614  | 0.108 |
| Kank1         | 0.017654144 | -0.023799871 | 0.04  |
| Pop5          | 0.017675079 | 0.025225535  | 0.084 |
| Rad23a        | 0.017709788 | 0.045181715  | 0.092 |
| Etnk1         | 0.01772259  | -0.178114334 | 0.069 |
| Chd4          | 0.01772661  | 0.105823584  | 0.272 |
| Stxbp3a       | 0.017731314 | 0.084642056  | 0.081 |
| Sri           | 0.018071451 | -0.162034808 | 0.171 |
| Ube2w         | 0.018277103 | 0.048707186  | 0.063 |
| Dnajc10       | 0.018296764 | -0.173224912 | 0.054 |
| Hdgf          | 0.01838001  | -0.170567295 | 0.159 |



|           |             |              |       |
|-----------|-------------|--------------|-------|
| Atxn2     | 0.01848367  | 0.058666386  | 0.056 |
| Rock1     | 0.018533915 | 0.054391222  | 0.139 |
| Dhx36     | 0.018593889 | 0.089655149  | 0.084 |
| Idh3b     | 0.019000497 | -0.197577367 | 0.118 |
| Ndufs4    | 0.019084312 | -0.16486779  | 0.137 |
| Mrpl51    | 0.019178223 | -0.12800099  | 0.126 |
| Acot7     | 0.019198904 | -0.1358169   | 0.052 |
| Ufm1      | 0.019231921 | -0.088451036 | 0.066 |
| Zfp580    | 0.019278802 | -0.133582775 | 0.042 |
| Ap1s1     | 0.019312906 | -0.15901921  | 0.06  |
| Ahnak     | 0.019545439 | -0.045939992 | 0.318 |
| Sh3gl1    | 0.019629512 | 0.03271022   | 0.078 |
| Vti1b     | 0.019682302 | -0.137452421 | 0.093 |
| Dnlz      | 0.019701617 | -0.014822021 | 0.106 |
| Rab18     | 0.019725834 | -0.150495946 | 0.114 |
| Zfp106    | 0.019730576 | 0.045710317  | 0.083 |
| Msrb1     | 0.019896326 | -0.147937185 | 0.065 |
| Wdr89     | 0.020002666 | 0.107023507  | 0.108 |
| Pycr2     | 0.020141944 | 0.004922194  | 0.067 |
| Fundc2    | 0.020691527 | -0.15082149  | 0.069 |
| Khdrbs1   | 0.020693601 | -0.220219926 | 0.122 |
| Dcaf6     | 0.020707775 | 0.009553072  | 0.054 |
| Srp68     | 0.020880611 | 0.05196524   | 0.053 |
| Sqstm1    | 0.020966852 | -0.024791349 | 0.232 |
| Apoa1bp   | 0.02098446  | -0.15951909  | 0.13  |
| Art3      | 0.021092625 | -0.106819422 | 0.669 |
| Nfu1      | 0.02112144  | -0.139488947 | 0.073 |
| Sept9     | 0.021188395 | -0.145210838 | 0.097 |
| Tmem127   | 0.021258678 | 0.027554882  | 0.057 |
| Atp6v1h   | 0.021277554 | -0.133592388 | 0.038 |
| Atp6ap1   | 0.021282092 | -0.129981476 | 0.188 |
| D10Jhu81e | 0.021293571 | -0.151143635 | 0.059 |
| Glud1     | 0.021329886 | -0.191303537 | 0.093 |
| Bax       | 0.021368169 | 0.116706406  | 0.111 |
| Hmox2     | 0.021373928 | -0.126886036 | 0.042 |
| Slc12a4   | 0.021480707 | 0.054219654  | 0.079 |
| Nrp2      | 0.02161062  | -0.260528341 | 0.051 |
| Copa      | 0.021968761 | 0.015995785  | 0.086 |
| Hnrnpm    | 0.02197643  | -0.153548524 | 0.176 |
| Hnrnp1    | 0.022160967 | -0.159196948 | 0.155 |
| Srsf6     | 0.022379299 | 0.036709401  | 0.115 |
| Psm8      | 0.022590163 | -0.16262182  | 0.127 |
| Polr2g    | 0.022605862 | -0.008479052 | 0.151 |

|               |             |              |       |
|---------------|-------------|--------------|-------|
| Eif2s1        | 0.022731013 | 0.027934092  | 0.07  |
| Map7d2        | 0.022745363 | 0.084365585  | 0.079 |
| Rpl22l1       | 0.023208428 | 0.106734425  | 0.099 |
| Commd8        | 0.023210822 | -0.166626208 | 0.053 |
| Zhx1          | 0.023300125 | -0.071869487 | 0.082 |
| Supt4a        | 0.023413697 | 0.074016691  | 0.106 |
| Rufy2         | 0.023425194 | 0.052859187  | 0.064 |
| Arl4a         | 0.023468791 | -0.151262465 | 0.04  |
| Ddit4         | 0.02351445  | -0.070524756 | 0.091 |
| Lamc1         | 0.023564653 | 0.020394463  | 0.084 |
| Rps13         | 0.023591979 | 0.080209527  | 0.069 |
| Peli1         | 0.023644777 | -0.051268065 | 0.042 |
| Nudc          | 0.023868103 | 0.090181895  | 0.112 |
| Naa15         | 0.024113813 | -0.00086439  | 0.091 |
| Magoh         | 0.024127944 | -0.193276243 | 0.096 |
| Dnm1l         | 0.024256289 | -0.085018443 | 0.053 |
| Dcaf12        | 0.024299115 | -0.109457733 | 0.039 |
| Bola3         | 0.024416286 | -0.096826468 | 0.065 |
| Fbxo3         | 0.02465343  | 0.024439331  | 0.115 |
| Rpain         | 0.024901724 | -0.090262582 | 0.038 |
| Cdc42se1      | 0.024922162 | -0.178825981 | 0.124 |
| Cbx5          | 0.025062477 | -0.138506785 | 0.111 |
| Rab5c         | 0.025062674 | 0.036650543  | 0.085 |
| Gt(ROSA)26Sor | 0.025299083 | 0.03394106   | 0.068 |
| M6pr          | 0.025708936 | -0.003117382 | 0.171 |
| Cox6a1        | 0.025854628 | -0.063882099 | 0.514 |
| Arfrp1        | 0.025887398 | 0.050900378  | 0.063 |
| Psenen        | 0.026014439 | 0.118994743  | 0.062 |
| Emc7          | 0.026250111 | 0.035244281  | 0.259 |
| Rps27l        | 0.026280514 | -0.137330429 | 0.216 |
| Alg14         | 0.026288328 | -0.20480899  | 0.062 |
| Trappc5       | 0.02633854  | -0.117843205 | 0.04  |
| Ik            | 0.026448053 | 0.013957237  | 0.2   |
| Lamtor5       | 0.026583295 | -0.14101035  | 0.142 |
| Rap1gap       | 0.026670715 | -0.10203605  | 0.048 |
| Aktip         | 0.026741389 | -0.136380408 | 0.081 |
| Appl2         | 0.026916685 | 0.074285083  | 0.063 |
| Stx5a         | 0.026920602 | 0.029804394  | 0.056 |
| Zfp260        | 0.027159628 | 0.031642824  | 0.06  |
| Lamtor1       | 0.027442765 | -0.125983288 | 0.156 |
| Ube2e1        | 0.027677634 | 0.069812912  | 0.108 |
| Gtl3          | 0.027728593 | 0.047676258  | 0.146 |
| Lama2         | 0.02804085  | 0.007288261  | 0.087 |

|               |             |              |       |
|---------------|-------------|--------------|-------|
| B230118H07Rik | 0.028132818 | -0.148830503 | 0.056 |
| Pld3          | 0.028175562 | -0.128050171 | 0.063 |
| Hprt          | 0.02835115  | -0.125231504 | 0.063 |
| Zfp536        | 0.028404209 | 0.019460535  | 0.066 |
| Napg          | 0.028471101 | -0.023222957 | 0.063 |
| Szrd1         | 0.028473326 | 0.028938353  | 0.057 |
| Stmn3         | 0.028500677 | -0.100622209 | 0.115 |
| Herpud2       | 0.028729151 | 0.031905015  | 0.053 |
| Srsf10        | 0.028748527 | 0.008173624  | 0.076 |
| Prkrip1       | 0.028836562 | 0.017810642  | 0.052 |
| Acbd6         | 0.029050534 | -0.161510173 | 0.06  |
| Polr3k        | 0.029051415 | -0.105031059 | 0.041 |
| March7        | 0.029114601 | 0.039329798  | 0.051 |
| Rrbp1         | 0.029201186 | -0.159315576 | 0.21  |
| Gps2          | 0.029249953 | 0.113725245  | 0.063 |
| Smarca4       | 0.029422215 | 0.013697786  | 0.09  |
| Lgals8        | 0.029570864 | -0.016141003 | 0.055 |
| Nt5c          | 0.029639084 | -0.17001445  | 0.095 |
| Cpsf6         | 0.029704145 | 0.073182023  | 0.057 |
| Zc3h15        | 0.02980289  | 0.0614599    | 0.135 |
| Selt          | 0.029977842 | 0.017657334  | 0.127 |
| Snx6          | 0.03002352  | 0.02291219   | 0.202 |
| Zfyve21       | 0.030074766 | -0.199243787 | 0.129 |
| Kat5          | 0.030127429 | 0.021014812  | 0.054 |
| Supt6         | 0.030719916 | -0.110845861 | 0.042 |
| Fam193a       | 0.030734697 | 0.019432386  | 0.054 |
| Fbxw2         | 0.030876622 | 0.037280183  | 0.063 |
| Ube2q1        | 0.031118169 | 0.039547567  | 0.06  |
| Eno1          | 0.031120843 | 0.07586793   | 0.151 |
| Trappc3       | 0.03129254  | -0.121818469 | 0.067 |
| Ndufs3        | 0.031760919 | 0.09932363   | 0.124 |
| Abhd6         | 0.031830302 | -0.080681331 | 0.051 |
| Hdac2         | 0.032051773 | -0.141601383 | 0.073 |
| Dcun1d5       | 0.032117149 | 0.067182973  | 0.079 |
| Drap1         | 0.032346347 | 0.041827969  | 0.155 |
| Slc35b1       | 0.032400605 | -0.14204872  | 0.111 |
| Fam76a        | 0.032505898 | 0.001360831  | 0.078 |
| Ccdc12        | 0.032514437 | -0.108314239 | 0.057 |
| Pcsk1n        | 0.03253516  | -0.185777572 | 0.102 |
| Txndc5        | 0.032542637 | -0.021271095 | 0.059 |
| Por           | 0.032555828 | -0.104129805 | 0.057 |
| Fez2          | 0.03285889  | 0.026835856  | 0.094 |
| Mrps21        | 0.032888519 | -0.1201922   | 0.092 |

|               |             |              |       |
|---------------|-------------|--------------|-------|
| Ctdsp2        | 0.032912002 | -0.008975773 | 0.1   |
| Itsn1         | 0.032958069 | 0.061012571  | 0.099 |
| Olfm1         | 0.033108119 | -0.188720871 | 0.091 |
| Vkorc1        | 0.033424935 | -0.175176958 | 0.135 |
| Idh3g         | 0.033452951 | -0.126201092 | 0.118 |
| Rpl7l1        | 0.033698641 | -0.112140436 | 0.06  |
| Gpatch8       | 0.033770649 | 0.060241803  | 0.08  |
| Sin3b         | 0.033834081 | 0.050195831  | 0.112 |
| Mtx2          | 0.033883111 | -0.098263927 | 0.048 |
| Prpf38b       | 0.034059577 | 0.090820037  | 0.135 |
| Idnk          | 0.034519709 | -0.176003659 | 0.043 |
| Nab1          | 0.034983636 | 0.021467638  | 0.061 |
| Bphl          | 0.035378247 | -0.167417871 | 0.044 |
| Tmem126a      | 0.035382112 | -0.167204054 | 0.052 |
| Coa3          | 0.035477228 | -0.111790871 | 0.118 |
| Cct7          | 0.03588273  | 0.028478876  | 0.179 |
| Atp6v0b       | 0.035922375 | -0.131239333 | 0.211 |
| Agpat1        | 0.03607767  | 0.009706807  | 0.064 |
| Cdc16         | 0.036143288 | -0.136973024 | 0.06  |
| Tgoln1        | 0.036146078 | -0.173733882 | 0.097 |
| Pef1          | 0.036242292 | -0.143920767 | 0.051 |
| Rbmxl1        | 0.036673836 | 0.070812097  | 0.054 |
| Smim20        | 0.037094259 | -0.176949131 | 0.045 |
| Rraga         | 0.037199777 | -0.132997962 | 0.067 |
| Flywch1       | 0.037354435 | -0.17651805  | 0.05  |
| C1galt1c1     | 0.037717378 | -0.185922881 | 0.04  |
| Polr2h        | 0.037729762 | -0.175522751 | 0.047 |
| Snrpe         | 0.037821612 | -0.115328173 | 0.121 |
| Scand1        | 0.037826887 | -0.145613108 | 0.163 |
| Mrpl21        | 0.037929795 | -0.119287202 | 0.085 |
| Nek7          | 0.037975026 | 0.005509955  | 0.091 |
| Tmem97        | 0.03800606  | 0.04281242   | 0.073 |
| Vdac3         | 0.038291875 | 0.044944514  | 0.103 |
| Trpc4ap       | 0.038338955 | 0.012948751  | 0.062 |
| Dph3          | 0.038427445 | -0.126838657 | 0.072 |
| Matr3         | 0.038455268 | -0.13275839  | 0.174 |
| Gatad1        | 0.039047286 | -0.019526338 | 0.091 |
| Myeov2        | 0.039382159 | 0.10224015   | 0.266 |
| Maoa          | 0.039540405 | -0.199675545 | 0.063 |
| Cd164         | 0.040169738 | 0.07823039   | 0.131 |
| Fibp          | 0.040244357 | -0.144283291 | 0.105 |
| 2810468N07Rik | 0.040350317 | -0.013412458 | 0.099 |
| Ddx24         | 0.040649922 | -0.12091614  | 0.133 |

|          |             |              |       |
|----------|-------------|--------------|-------|
| Zcchc17  | 0.040802429 | -0.19593872  | 0.112 |
| Nudt16l1 | 0.040895794 | -0.172161613 | 0.073 |
| Nudt7    | 0.040950445 | -0.124617576 | 0.045 |
| Tpr      | 0.041038148 | 0.007984488  | 0.167 |
| Hk1      | 0.041115699 | -0.126547701 | 0.047 |
| Psmb5    | 0.041221521 | -0.147029933 | 0.125 |
| Pgd      | 0.041284283 | -0.127410616 | 0.069 |
| Fam132a  | 0.041354303 | -0.030133985 | 0.063 |
| Fam50a   | 0.041457646 | 0.053338466  | 0.101 |
| Srprb    | 0.042423183 | 0.052865651  | 0.063 |
| Eif3m    | 0.042518158 | 0.022139317  | 0.122 |
| Arl6ip4  | 0.042925375 | 0.08677425   | 0.107 |
| AI314180 | 0.043119109 | -0.006331974 | 0.053 |
| Dync2li1 | 0.04347074  | -0.065226063 | 0.045 |
| Ehmt2    | 0.043584975 | -0.059775849 | 0.042 |
| Snrpf    | 0.043749852 | -0.129621694 | 0.051 |
| Pacsin2  | 0.043928729 | -0.130930525 | 0.058 |
| Mid1ip1  | 0.044050865 | -0.127445624 | 0.271 |
| Etf1     | 0.044320303 | 0.038591313  | 0.078 |
| Gnb1     | 0.044325903 | 0.003573437  | 0.182 |
| Mllt3    | 0.044459729 | 0.060298843  | 0.057 |
| Sox10    | 0.044534106 | -0.015205955 | 0.302 |
| Nosip    | 0.045148592 | 0.026652653  | 0.072 |
| Nxf1     | 0.045242665 | 0.000273038  | 0.066 |
| Snx5     | 0.045242766 | -0.103310365 | 0.069 |
| Nsmce1   | 0.045357581 | -0.125024465 | 0.091 |
| Sars     | 0.04554386  | -0.092468011 | 0.109 |
| Fkbp9    | 0.045578076 | -0.005556247 | 0.162 |
| Rab22a   | 0.045652732 | 0.051743498  | 0.064 |
| Ube2k    | 0.046049165 | -0.145728689 | 0.129 |
| Srpr     | 0.046078078 | 0.020263081  | 0.132 |
| Cdpf1    | 0.046137844 | 0.008618842  | 0.051 |
| Cetn3    | 0.04627799  | 0.009211853  | 0.262 |
| Serinc5  | 0.046460362 | 0.064797034  | 0.076 |
| Spen     | 0.046633224 | 0.049538662  | 0.053 |
| Ufd1l    | 0.046649652 | -0.11308924  | 0.042 |
| Tceb1    | 0.047054871 | -0.148512615 | 0.116 |
| Morf4l1  | 0.04716877  | 0.073073855  | 0.107 |
| Naa35    | 0.04717338  | 0.053327178  | 0.072 |
| Ccnh     | 0.047575594 | -0.147620523 | 0.062 |
| Cltc     | 0.047597195 | 0.028894495  | 0.102 |
| Pdcd10   | 0.047878184 | 0.035836884  | 0.098 |
| Brcc3    | 0.047880737 | 0.090802212  | 0.074 |

|               |             |              |       |
|---------------|-------------|--------------|-------|
| Peg3          | 0.047929486 | -0.122995499 | 0.041 |
| Rnf167        | 0.048152035 | 0.027865059  | 0.111 |
| Acot13        | 0.048276428 | -0.15869381  | 0.085 |
| Grb2          | 0.048337862 | 0.022965638  | 0.127 |
| Etfb          | 0.048909151 | -0.122507704 | 0.278 |
| Guk1          | 0.048919044 | 0.05663195   | 0.113 |
| R3hdm4        | 0.049259955 | 0.053980215  | 0.068 |
| Mrpl12        | 0.04933703  | -0.159528099 | 0.084 |
| Tm9sf2        | 0.04952523  | -0.122887012 | 0.114 |
| Tmem11        | 0.049572585 | 0.027718704  | 0.061 |
| Ppp1cb        | 0.050166368 | -0.001894421 | 0.131 |
| Sdhd          | 0.050169495 | -0.125480481 | 0.136 |
| Ogdh          | 0.050256282 | -0.114722704 | 0.062 |
| Rbx1          | 0.050528798 | -0.11602555  | 0.246 |
| Psmc9         | 0.050635037 | -0.009116528 | 0.076 |
| Cdip1         | 0.050803423 | -0.061450177 | 0.074 |
| Sf1           | 0.051207714 | 0.021461748  | 0.082 |
| Yy1           | 0.051284491 | 0.045476547  | 0.069 |
| Mphosph10     | 0.051343443 | -0.178396165 | 0.059 |
| Vimp          | 0.051856278 | 0.024323163  | 0.209 |
| Triap1        | 0.051971993 | -0.046236725 | 0.064 |
| Snrnp27       | 0.052036369 | 0.028711057  | 0.119 |
| Aff4          | 0.052584667 | -0.016428747 | 0.079 |
| Coq2          | 0.05299438  | -0.090638058 | 0.045 |
| Ddx21         | 0.053138385 | 0.022830958  | 0.069 |
| Skp1a         | 0.053318925 | -0.071430261 | 0.382 |
| Dgcr6         | 0.053485869 | -0.140007639 | 0.06  |
| Tmem184c      | 0.053715873 | -0.09793085  | 0.065 |
| Ddx42         | 0.0538681   | -0.102886531 | 0.075 |
| Cab39         | 0.054375018 | -0.150355528 | 0.057 |
| Krt10         | 0.054546491 | -0.092358915 | 0.053 |
| Aimp1         | 0.054728434 | 5.39E-05     | 0.077 |
| Sec22b        | 0.055026584 | -0.157653501 | 0.078 |
| Ensa          | 0.055765317 | -0.152878753 | 0.075 |
| Abhd17a       | 0.055787605 | 0.040403609  | 0.06  |
| Efnb1         | 0.055933014 | -0.086685135 | 0.064 |
| Ddit3         | 0.055968612 | 0.045418225  | 0.058 |
| Lsmd1         | 0.056577402 | 0.028468132  | 0.137 |
| Zfp207        | 0.056592703 | 0.069150134  | 0.111 |
| Timm8b        | 0.056630358 | 0.047937358  | 0.166 |
| Pagr1a        | 0.056674025 | 0.054125021  | 0.066 |
| Dlgap4        | 0.05687612  | 0.020892194  | 0.078 |
| 6330403K07Rik | 0.05697211  | 0.004813973  | 0.054 |

|               |             |              |       |
|---------------|-------------|--------------|-------|
| Baz2b         | 0.056986078 | 0.04375418   | 0.091 |
| Yipf3         | 0.057381608 | -0.138744408 | 0.085 |
| Pcif1         | 0.058034048 | 0.125043621  | 0.062 |
| Nol7          | 0.058705977 | -0.08251216  | 0.192 |
| Golgb1        | 0.058932777 | -0.130222371 | 0.109 |
| Pin1          | 0.059260885 | 0.017962791  | 0.109 |
| Rabep1        | 0.059352839 | 0.016045101  | 0.125 |
| Tcp1          | 0.059746652 | 0.039044299  | 0.109 |
| Cct4          | 0.0601184   | -0.155442216 | 0.101 |
| Bub3          | 0.060343828 | -0.025195441 | 0.118 |
| Stag2         | 0.060370424 | -0.012387908 | 0.076 |
| Chordc1       | 0.060453998 | -0.023199244 | 0.051 |
| Cln3          | 0.060555076 | -0.069673744 | 0.044 |
| Pnrc1         | 0.060959191 | -0.089340991 | 0.178 |
| Acsl3         | 0.06107824  | 0.027709891  | 0.112 |
| H2-Ke2        | 0.061107609 | -0.044054821 | 0.112 |
| Snrpa         | 0.061237417 | 0.054462035  | 0.053 |
| Il11ra1       | 0.061653642 | -0.098891101 | 0.045 |
| 0610009B22Rik | 0.062058577 | -0.148184972 | 0.059 |
| Mpdu1         | 0.062142477 | -0.089666137 | 0.046 |
| Sdhd          | 0.062535461 | -0.146973121 | 0.191 |
| Coro1b        | 0.062763056 | 0.006903399  | 0.117 |
| Fam195b       | 0.062807379 | -0.068267517 | 0.151 |
| Cul5          | 0.063524797 | 0.063582307  | 0.084 |
| Slc7a2        | 0.063535385 | 0.161562227  | 0.088 |
| Ankra2        | 0.06365156  | 0.028631332  | 0.053 |
| Rpl18         | 0.064124925 | 0.044520419  | 0.208 |
| Mtx1          | 0.064317433 | -0.150950117 | 0.045 |
| Atp2b1        | 0.064378024 | 0.077522399  | 0.164 |
| Acbd5         | 0.06472996  | 0.072110279  | 0.121 |
| Anxa4         | 0.065376063 | -0.052730619 | 0.06  |
| Ywhaq         | 0.065532195 | 0.0436614    | 0.337 |
| Rock2         | 0.065562041 | 0.031367095  | 0.116 |
| Psip1         | 0.065877188 | -0.073905376 | 0.15  |
| Rnf216        | 0.066022118 | 0.018504228  | 0.061 |
| Snx27         | 0.06604797  | 0.060945907  | 0.068 |
| Ankhd1        | 0.066164647 | 0.074115015  | 0.053 |
| Rwdd1         | 0.066610665 | 0.079729361  | 0.117 |
| Ost4          | 0.066767513 | 0.062704367  | 0.151 |
| Hspa4l        | 0.067115285 | -0.031109395 | 0.092 |
| Smarce1       | 0.067365929 | 0.093704143  | 0.066 |
| Med8          | 0.067734575 | 0.008332476  | 0.085 |
| H2afy         | 0.067899791 | -0.131419366 | 0.077 |



|               |             |              |       |
|---------------|-------------|--------------|-------|
| Cyhr1         | 0.068148546 | 0.005337102  | 0.146 |
| Tecpr1        | 0.068410679 | -0.104179317 | 0.046 |
| Etfdh         | 0.068418728 | -0.113574137 | 0.043 |
| Ap1s2         | 0.068608208 | 0.028073761  | 0.074 |
| Cers5         | 0.068768018 | -0.119172187 | 0.072 |
| Sumo1         | 0.06893802  | -0.111830398 | 0.095 |
| Tspan15       | 0.069038504 | 0.033830097  | 0.27  |
| H13           | 0.069062695 | -0.173190128 | 0.103 |
| S100a10       | 0.069371315 | -0.139733557 | 0.283 |
| Ddx46         | 0.069526776 | 0.005574473  | 0.105 |
| Nap1l1        | 0.069538489 | 0.089915153  | 0.152 |
| Nars          | 0.070133916 | -0.065278437 | 0.127 |
| Sec31a        | 0.070201597 | 0.024218992  | 0.053 |
| Unc50         | 0.070326009 | -0.121908575 | 0.12  |
| Dcn           | 0.070356241 | -0.122581987 | 0.05  |
| Mkrm1         | 0.070680509 | 0.032302055  | 0.051 |
| Nfkbia        | 0.071194938 | -0.307660145 | 0.173 |
| Uba3          | 0.071444617 | 0.009639405  | 0.073 |
| Pqbp1         | 0.071543573 | -0.174448151 | 0.088 |
| Zc3h14        | 0.071572655 | -0.055294373 | 0.057 |
| Crtap         | 0.071599234 | -0.164635577 | 0.057 |
| Zc3h7a        | 0.072102962 | -0.010671967 | 0.055 |
| Polr2j        | 0.072275739 | 0.057994036  | 0.114 |
| Dcaf11        | 0.072349648 | 0.005997574  | 0.062 |
| Atp5b         | 0.072384848 | -0.070888011 | 0.487 |
| Mob4          | 0.07267023  | -0.179631594 | 0.094 |
| Camk1         | 0.073332806 | -0.139977696 | 0.079 |
| Rpl19         | 0.073940738 | 0.076979021  | 0.112 |
| 2700029M09Rik | 0.07436179  | -0.139124545 | 0.077 |
| BC005537      | 0.074505466 | -0.009803116 | 0.133 |
| Srsf4         | 0.074533017 | -0.112533737 | 0.06  |
| Chd9          | 0.074541411 | 0.024257401  | 0.052 |
| Dcaf8         | 0.074651487 | 0.036080479  | 0.105 |
| Mrps15        | 0.074881562 | -0.032408858 | 0.111 |
| 1700021F05Rik | 0.075277486 | 0.051631649  | 0.052 |
| Fam133b       | 0.075421923 | -0.107951853 | 0.045 |
| Dync1li1      | 0.076162463 | 0.015815668  | 0.054 |
| Map1a         | 0.076525339 | -0.13510579  | 0.07  |
| Tsg101        | 0.07654645  | 0.024817452  | 0.13  |
| Pdxdc1        | 0.076775893 | -0.029124148 | 0.068 |
| Pfdn4         | 0.076824839 | -0.104942122 | 0.058 |
| Ghitm         | 0.077578544 | -0.097677815 | 0.191 |
| Surf1         | 0.077641457 | -0.034489563 | 0.126 |

|               |             |              |       |
|---------------|-------------|--------------|-------|
| Mvp           | 0.077868811 | 0.021894664  | 0.07  |
| Rpl15         | 0.078961064 | -0.087876349 | 0.044 |
| Asah1         | 0.079340895 | -0.002736326 | 0.155 |
| Phb           | 0.079375942 | -0.112172139 | 0.066 |
| Galk1         | 0.079861709 | 0.044054144  | 0.062 |
| Aup1          | 0.080151079 | 0.039404304  | 0.088 |
| Tnfsf12       | 0.080329973 | -0.144098358 | 0.047 |
| Rabl6         | 0.080353936 | 0.014991851  | 0.07  |
| Csnk1e        | 0.081051797 | -0.177885275 | 0.045 |
| Psmc7         | 0.081086535 | -0.009862674 | 0.284 |
| Itpk1         | 0.081150444 | -0.056057444 | 0.101 |
| Zmpste24      | 0.081309895 | -0.163901547 | 0.073 |
| Ewsr1         | 0.082009107 | -0.003615221 | 0.116 |
| Rpl35         | 0.082207674 | 0.140770768  | 0.102 |
| Sf3a3         | 0.082345548 | -0.094040984 | 0.059 |
| Dynll2        | 0.082781997 | -0.070832595 | 0.129 |
| Gabarap       | 0.083223975 | -0.100321943 | 0.397 |
| Gnaq          | 0.083245896 | -0.051528904 | 0.17  |
| Rbms1         | 0.083565818 | -0.14026323  | 0.116 |
| Nisch         | 0.083851246 | 0.015812398  | 0.111 |
| Commd2        | 0.083878703 | -0.144452972 | 0.048 |
| Npepps        | 0.083969542 | 0.000192321  | 0.13  |
| Gspt1         | 0.084333191 | 0.033485608  | 0.098 |
| Mmadhc        | 0.084435847 | 0.013115481  | 0.082 |
| 2610002J02Rik | 0.084547076 | -0.114874459 | 0.05  |
| Uqcrc2        | 0.084589913 | 0.021239857  | 0.222 |
| Abi1          | 0.085398656 | -0.115821612 | 0.071 |
| Lta4h         | 0.086255843 | 0.081832432  | 0.073 |
| Fktn          | 0.08689285  | 0.000604547  | 0.079 |
| Slco3a1       | 0.087067632 | -0.017129855 | 0.091 |
| Mphosph8      | 0.087666838 | 0.06425376   | 0.143 |
| Hdlbp         | 0.087851928 | -0.144304858 | 0.066 |
| Kxd1          | 0.088079142 | -0.024768805 | 0.071 |
| Rad23b        | 0.088180366 | -0.088169179 | 0.053 |
| Tob1          | 0.088199373 | 0.024678708  | 0.073 |
| Sqle          | 0.088375052 | -0.090260208 | 0.191 |
| Ptplb         | 0.088407651 | -0.017755615 | 0.11  |
| 2810474O19Rik | 0.088979368 | 0.024044708  | 0.059 |
| G3bp2         | 0.08987665  | -0.122235205 | 0.145 |
| Lrp1          | 0.090420892 | 0.013921731  | 0.057 |
| Ppp2cb        | 0.09079336  | 0.006849798  | 0.056 |
| Rbm8a         | 0.090854569 | 0.017768803  | 0.173 |
| Srd5a1        | 0.091073875 | -0.005835918 | 0.068 |

|               |             |              |       |
|---------------|-------------|--------------|-------|
| Atp2a2        | 0.091260525 | -0.116417415 | 0.051 |
| 4930402H24Rik | 0.092025202 | 0.026956039  | 0.081 |
| 2310011J03Rik | 0.092264744 | 0.013161128  | 0.087 |
| Atg3          | 0.092420403 | -0.104871715 | 0.119 |
| Tor1aip2      | 0.092595096 | -0.017181253 | 0.07  |
| Nop16         | 0.092793321 | -0.149226409 | 0.055 |
| Col14a1       | 0.093447328 | -0.080953191 | 0.155 |
| Ccdc104       | 0.093507335 | -0.06681887  | 0.171 |
| Tmem219       | 0.093674207 | -0.031926586 | 0.102 |
| Sel1l         | 0.094061772 | 0.060393684  | 0.059 |
| Tnrc6a        | 0.094433741 | 0.012220785  | 0.062 |
| Ilk           | 0.095480401 | -0.156579898 | 0.18  |
| Hnrnpul2      | 0.096169531 | 0.00376469   | 0.059 |
| Dnajc8        | 0.096252221 | -0.103819201 | 0.204 |
| Maea          | 0.096343666 | -0.126383304 | 0.061 |
| Tmem179b      | 0.096499736 | -0.137607027 | 0.048 |
| Trappc2       | 0.096541748 | 0.076324799  | 0.069 |
| Lmbrd1        | 0.096820504 | 0.017881889  | 0.18  |
| Polb          | 0.096990661 | 0.010511041  | 0.056 |
| Srpk2         | 0.097153202 | -0.108396107 | 0.093 |
| Rnf6          | 0.097675773 | -0.031672151 | 0.055 |
| Rps15         | 0.098093289 | 0.022514644  | 0.475 |
| Sar1a         | 0.098140953 | -0.154751538 | 0.172 |
| Ssr4          | 0.098422836 | -0.181152468 | 0.158 |
| Idh3a         | 0.098611706 | 0.043025235  | 0.107 |
| BC029722      | 0.098625755 | -0.043287821 | 0.06  |
| Pdpf          | 0.098999508 | -0.116684229 | 0.146 |
| Fopnl         | 0.099154128 | -0.094087255 | 0.048 |
| Alkbh6        | 0.099976381 | 0.042877858  | 0.066 |
| Aebp2         | 0.100065557 | -0.127737279 | 0.043 |
| Herc2         | 0.100868002 | -0.002524107 | 0.051 |
| Klhdc2        | 0.100924607 | -0.16622314  | 0.072 |
| Cuedc1        | 0.101129432 | 0.039352985  | 0.059 |
| Taf3          | 0.101868088 | 0.030386712  | 0.058 |
| Cdk4          | 0.101870687 | -0.09711575  | 0.087 |
| Pnpla8        | 0.101950061 | -0.003431687 | 0.113 |
| Arhgef26      | 0.102052632 | -0.07116186  | 0.052 |
| Ilvbl         | 0.102177249 | 0.050388834  | 0.053 |
| Smim8         | 0.102745106 | -0.003035607 | 0.067 |
| Rps3          | 0.10298903  | -0.072394268 | 0.561 |
| Eif2a         | 0.103217991 | 0.02321312   | 0.069 |
| Arhgap29      | 0.103407617 | -0.047334719 | 0.053 |
| Tmem237       | 0.103586916 | -0.177867242 | 0.065 |

|          |             |              |       |
|----------|-------------|--------------|-------|
| Mff      | 0.106089387 | 0.02081255   | 0.166 |
| Tardbp   | 0.106409409 | 0.047874649  | 0.119 |
| Anapc13  | 0.107018478 | -0.003242666 | 0.139 |
| Rps4y2   | 0.107335955 | -0.082451819 | 0.051 |
| Tbcb     | 0.107433212 | -0.107864389 | 0.188 |
| mt-Nd4   | 0.107602501 | -0.019168322 | 0.719 |
| Gng5     | 0.108844987 | -0.086424554 | 0.134 |
| B4galt6  | 0.10910489  | 0.031981844  | 0.056 |
| Rplp2    | 0.109318779 | 0.044837393  | 0.392 |
| Plcb4    | 0.109670373 | -0.110002552 | 0.081 |
| Supt5    | 0.110197307 | 0.030494491  | 0.058 |
| Eif3e    | 0.110280938 | -3.48E-07    | 0.137 |
| Magt1    | 0.110315402 | -0.215166767 | 0.183 |
| Msn      | 0.111011868 | -0.069162177 | 0.149 |
| Mbd3     | 0.111376987 | -0.127182808 | 0.061 |
| Usp5     | 0.111736879 | -0.025558258 | 0.058 |
| Hdhd2    | 0.111944588 | 0.003189     | 0.13  |
| Tomm7    | 0.112952723 | -0.107517756 | 0.147 |
| Usp7     | 0.113156863 | -0.037698314 | 0.047 |
| Rnf168   | 0.11324238  | -0.122745575 | 0.05  |
| Rbbp6    | 0.113511084 | 0.03694374   | 0.102 |
| Ppp1ca   | 0.113531551 | 0.013240978  | 0.247 |
| Senp6    | 0.114149016 | 0.029560128  | 0.129 |
| Hars     | 0.114464279 | -0.16738568  | 0.05  |
| Gaa      | 0.114816253 | -0.121791781 | 0.072 |
| Nr4a1    | 0.115337147 | 0.072190483  | 0.203 |
| Cyb5     | 0.115414236 | -0.112327431 | 0.302 |
| Eef1e1   | 0.115606971 | -0.122846979 | 0.046 |
| Zc3h18   | 0.116445633 | -0.011851571 | 0.051 |
| Cggbp1   | 0.116777055 | 0.002706774  | 0.08  |
| Hsbp1    | 0.11727607  | 0.071404994  | 0.388 |
| Nfia     | 0.11801456  | -0.071491565 | 0.122 |
| Tubb4b   | 0.118020917 | -0.106387549 | 0.181 |
| Glr5     | 0.118105541 | -0.121260518 | 0.116 |
| Mkln1    | 0.118179575 | -0.074639758 | 0.054 |
| Nicn1    | 0.11830424  | -0.127197361 | 0.076 |
| Mkks     | 0.120191635 | -0.037888751 | 0.086 |
| Rufy3    | 0.121571868 | 0.008907984  | 0.052 |
| Fam126a  | 0.12217677  | -0.162395284 | 0.057 |
| Snx3     | 0.122368307 | -0.127810559 | 0.257 |
| Ctsf     | 0.123363361 | -0.152323822 | 0.057 |
| Atp6v1b2 | 0.12343244  | -0.162202925 | 0.071 |
| Tbc1d20  | 0.124029549 | 0.017752552  | 0.06  |

|               |             |              |       |
|---------------|-------------|--------------|-------|
| Srsf3         | 0.124299001 | -0.114833864 | 0.192 |
| Ccdc174       | 0.12505433  | 0.039788813  | 0.051 |
| Mrp63         | 0.126156781 | 0.042466071  | 0.083 |
| Oxct1         | 0.126312888 | -0.024317226 | 0.24  |
| Yipf4         | 0.126722139 | 0.029116123  | 0.114 |
| Ccni          | 0.12718354  | 0.0139905    | 0.077 |
| BC003965      | 0.127188079 | 0.045497984  | 0.065 |
| Eif3f         | 0.12739692  | -0.177404726 | 0.225 |
| Eif4g1        | 0.127994747 | 0.028236386  | 0.09  |
| Phyh          | 0.128479587 | 0.018399884  | 0.163 |
| Rab12         | 0.12932111  | -0.156721528 | 0.074 |
| Eif2b4        | 0.129824969 | 0.028689937  | 0.051 |
| Anp32e        | 0.130184644 | -0.057250149 | 0.151 |
| Isca2         | 0.130629104 | 0.050841169  | 0.094 |
| Arf5          | 0.131114229 | -0.015957146 | 0.208 |
| Ndufab1       | 0.131477906 | 0.020859735  | 0.137 |
| Hspa14        | 0.131535251 | 0.007279061  | 0.051 |
| Fyttd1        | 0.131725742 | -0.006677981 | 0.093 |
| Wbp1          | 0.133228286 | -0.076846016 | 0.047 |
| Azi2          | 0.133352332 | -0.124856738 | 0.065 |
| Ndufv1        | 0.133665423 | -0.146026471 | 0.113 |
| Tmem261       | 0.134145472 | -0.212931556 | 0.067 |
| Syng2         | 0.135629348 | -0.036525072 | 0.063 |
| 2610507B11Rik | 0.13616716  | -0.148514672 | 0.073 |
| Eif5          | 0.136617676 | 0.0083127    | 0.251 |
| Pcnp          | 0.136938353 | 0.082423525  | 0.101 |
| Btg1          | 0.138221387 | -0.076450001 | 0.057 |
| Gng12         | 0.138623604 | -0.161920793 | 0.1   |
| Grb14         | 0.138788493 | 0.032455093  | 0.228 |
| Arcn1         | 0.138942073 | -0.049386364 | 0.089 |
| Fam32a        | 0.139087369 | -0.099405162 | 0.081 |
| Cfl1          | 0.139156973 | -0.09143196  | 0.264 |
| Chp1          | 0.139231998 | -0.160600488 | 0.086 |
| Adipor2       | 0.139326424 | -0.138731592 | 0.094 |
| Pfn1          | 0.139908339 | -0.089513157 | 0.406 |
| Arvcf         | 0.14032112  | -0.118560321 | 0.085 |
| Cyp20a1       | 0.140470901 | -0.095246651 | 0.059 |
| Psm13         | 0.140762404 | 0.016755864  | 0.081 |
| Rfk           | 0.142526913 | -0.128573008 | 0.085 |
| Ss18          | 0.143249602 | -0.100244854 | 0.047 |
| Lamtor3       | 0.143256404 | -0.009968646 | 0.076 |
| Psm12         | 0.144430525 | -0.130511375 | 0.115 |
| Yipf5         | 0.145089952 | -0.075076177 | 0.082 |

|               |             |              |       |
|---------------|-------------|--------------|-------|
| Tubb3         | 0.145547826 | -0.126641103 | 0.117 |
| Psm3          | 0.145685147 | 0.049471983  | 0.082 |
| Ccdc53        | 0.145927144 | 0.011117527  | 0.072 |
| Psm7          | 0.147672576 | -0.070264544 | 0.381 |
| 0610037L13Rik | 0.148017221 | 0.031865654  | 0.085 |
| Ube2l3        | 0.148198963 | 0.052049107  | 0.154 |
| Gtf3a         | 0.148313965 | -0.018076882 | 0.062 |
| Gng3          | 0.148443182 | 0.084479307  | 0.076 |
| Rpa3          | 0.148519598 | -0.118279868 | 0.08  |
| Sfr1          | 0.148772652 | -0.070661767 | 0.179 |
| Bcl2          | 0.148851563 | -0.142415281 | 0.062 |
| Aco2          | 0.148969554 | 0.000444667  | 0.159 |
| Aplp2         | 0.150388779 | -0.07757836  | 0.374 |
| Usp8          | 0.150552014 | -0.151094766 | 0.071 |
| Ndufb2        | 0.151413461 | 0.033823959  | 0.198 |
| Eif3d         | 0.15150311  | -0.106726358 | 0.108 |
| Ncl           | 0.152006728 | -0.102100858 | 0.345 |
| Ptp4a2        | 0.153602362 | -0.064755152 | 0.155 |
| Sec11c        | 0.155024591 | -0.097711358 | 0.159 |
| Slc25a39      | 0.155064468 | -0.077877129 | 0.082 |
| Fundc1        | 0.155549693 | -0.016069905 | 0.093 |
| BC003331      | 0.155847121 | -0.160494603 | 0.096 |
| Atxn7l3b      | 0.156733331 | 0.061494888  | 0.312 |
| Arsk          | 0.157065064 | -0.16297286  | 0.045 |
| Ndr3          | 0.157153992 | -0.002837831 | 0.076 |
| Snrg          | 0.159287498 | -0.100867186 | 0.056 |
| Bre           | 0.160295312 | -0.129961095 | 0.05  |
| Dohh          | 0.161868868 | -0.03284039  | 0.057 |
| Tmem147       | 0.161968264 | -0.108355754 | 0.15  |
| Pgap2         | 0.162141733 | -0.075595658 | 0.051 |
| Cox16         | 0.162689029 | 0.004629679  | 0.055 |
| Dnttip2       | 0.162703183 | -0.050626028 | 0.1   |
| Oaz1          | 0.162925201 | 0.019058578  | 0.309 |
| Fxr1          | 0.163541893 | -0.06848067  | 0.087 |
| Smc6          | 0.163574015 | -0.087455636 | 0.09  |
| Ing1          | 0.164142746 | 0.031367274  | 0.075 |
| Rpp21         | 0.165745325 | -0.055819149 | 0.099 |
| Btf3          | 0.165853823 | 0.035238468  | 0.215 |
| Ccar1         | 0.16650287  | -0.079539131 | 0.118 |
| Ppp1r7        | 0.166809915 | -0.139331567 | 0.065 |
| Jagn1         | 0.167197025 | -0.087168241 | 0.057 |
| Tcerg1        | 0.167368545 | 0.032646227  | 0.068 |
| Sh3bgrl3      | 0.167483881 | 0.081872081  | 0.247 |

|         |             |              |       |
|---------|-------------|--------------|-------|
| Gorasp2 | 0.168776364 | -0.144527099 | 0.075 |
| Slc50a1 | 0.170069326 | -0.085275568 | 0.094 |
| Ptpmt1  | 0.170280274 | -0.189023979 | 0.082 |
| Mrpl15  | 0.17101227  | -0.122435315 | 0.079 |
| Hspd1   | 0.171166659 | -0.054682887 | 0.14  |
| Rbm17   | 0.171460834 | -0.163109403 | 0.09  |
| Ift43   | 0.171482474 | -0.104275993 | 0.069 |
| Pfdn1   | 0.171853232 | -0.108748251 | 0.142 |
| Klf9    | 0.172162567 | -0.083113265 | 0.147 |
| Ppp1r2  | 0.172547725 | 0.024349778  | 0.096 |
| Tram1   | 0.173275741 | 0.050886597  | 0.142 |
| Mrpl20  | 0.175198405 | -0.085813794 | 0.152 |
| Ndufs1  | 0.17549504  | 0.063488439  | 0.075 |
| Arid4a  | 0.175856746 | 0.042032796  | 0.076 |
| Erc1    | 0.175889256 | -0.081813121 | 0.052 |
| Leo1    | 0.176821508 | -0.09995257  | 0.048 |
| Mapkap1 | 0.177113597 | 0.037596569  | 0.078 |
| Atrx    | 0.177430919 | 0.037482656  | 0.204 |
| Arfip1  | 0.177948353 | -0.036339397 | 0.122 |
| Minos1  | 0.177989949 | 0.010872039  | 0.283 |
| Commd3  | 0.179326972 | 0.029192809  | 0.116 |
| Eps15   | 0.179829406 | -0.113964834 | 0.075 |
| Gtf2h5  | 0.18146708  | -0.134832547 | 0.172 |
| Sae1    | 0.181906949 | -0.092583915 | 0.057 |
| Ick     | 0.182427312 | -0.061474035 | 0.06  |
| Raf1    | 0.18254526  | 0.001785574  | 0.058 |
| Bptf    | 0.182729123 | 0.056935548  | 0.1   |
| Stau1   | 0.182815231 | -0.116699189 | 0.047 |
| Trip6   | 0.184027028 | -0.096616764 | 0.062 |
| Sec62   | 0.184147363 | 0.015037859  | 0.401 |
| Rab34   | 0.185820017 | -0.105891248 | 0.144 |
| Tpgs1   | 0.185996566 | -0.010149576 | 0.105 |
| Anapc5  | 0.186241938 | -0.155571675 | 0.113 |
| Cct8    | 0.186266636 | -0.127369672 | 0.115 |
| Lias    | 0.186285892 | 0.03999717   | 0.056 |
| Tmbim4  | 0.186342432 | -0.161267809 | 0.146 |
| Rps4x   | 0.188073564 | -0.085004155 | 0.327 |
| Tomm40  | 0.188279652 | 0.001204291  | 0.051 |
| Azin1   | 0.189211994 | -0.032570081 | 0.166 |
| Map2k1  | 0.190793097 | -0.068801486 | 0.065 |
| Cept1   | 0.190849161 | -0.145956922 | 0.048 |
| Eif3a   | 0.19133289  | -0.099771433 | 0.238 |
| Acaa1a  | 0.193567893 | -0.018732937 | 0.119 |



|          |             |              |       |
|----------|-------------|--------------|-------|
| Samm50   | 0.194127999 | 0.014998154  | 0.085 |
| Rab3a    | 0.194356411 | 0.069065598  | 0.053 |
| Slmap    | 0.194611728 | -0.099100061 | 0.075 |
| Uchl1    | 0.194658971 | -0.080477069 | 0.235 |
| Naga     | 0.196013127 | -0.074451507 | 0.049 |
| Pfdn5    | 0.196344189 | -0.055717442 | 0.376 |
| Ptplad1  | 0.197542709 | 0.087008533  | 0.118 |
| Ctsd     | 0.198299525 | 0.036662384  | 0.32  |
| Rsl1d1   | 0.198779423 | -0.114256239 | 0.092 |
| Dek      | 0.1989522   | -0.116691172 | 0.193 |
| Hadh     | 0.198953219 | -0.186637309 | 0.137 |
| Atp6v0d1 | 0.199643472 | -0.076460702 | 0.139 |
| Syap1    | 0.199777275 | 0.001998005  | 0.081 |
| Sec63    | 0.199912142 | -0.031411435 | 0.093 |
| Cript    | 0.20091072  | -0.14969459  | 0.112 |
| Cnih1    | 0.201087009 | -0.03644261  | 0.122 |
| Esd      | 0.202381893 | -0.128449029 | 0.13  |
| Trpm7    | 0.203343718 | -0.129004406 | 0.06  |
| Dusp3    | 0.204682473 | -0.037665364 | 0.08  |
| Eif4e    | 0.204730382 | -0.039445614 | 0.064 |
| Sucla2   | 0.207204227 | -0.061065139 | 0.086 |
| Mrpl55   | 0.207587137 | -0.067127046 | 0.077 |
| R3hdm2   | 0.207690073 | -0.010866217 | 0.057 |
| Ndufa9   | 0.208029541 | -0.087095212 | 0.096 |
| Trmt112  | 0.209488727 | 0.0503235    | 0.064 |
| Smim19   | 0.209594064 | -0.074660961 | 0.058 |
| Tmed5    | 0.209747839 | -0.061650861 | 0.069 |
| Bod1l    | 0.210343876 | 0.050679436  | 0.129 |
| Nfe2l2   | 0.210431577 | -0.109309616 | 0.122 |
| Tmem128  | 0.211085303 | -0.003906984 | 0.08  |
| Slmo2    | 0.211548637 | -0.075507971 | 0.054 |
| Ubap2l   | 0.211657247 | 0.016300017  | 0.082 |
| Ntan1    | 0.212828927 | -0.101679284 | 0.124 |
| Nipbl    | 0.213265029 | -0.007205094 | 0.149 |
| Pole3    | 0.213589542 | -0.126908902 | 0.061 |
| Rnaseh2c | 0.213940819 | 0.015252178  | 0.096 |
| Fam172a  | 0.214488368 | 0.065793506  | 0.059 |
| Mtmr6    | 0.214589803 | 0.019595945  | 0.051 |
| Uba1     | 0.214877495 | -0.125603391 | 0.077 |
| Chmp2a   | 0.215146101 | -0.005410447 | 0.236 |
| Arl3     | 0.21543438  | -0.09343382  | 0.231 |
| Rtn4     | 0.216089273 | 0.016247153  | 0.272 |
| Gnl2     | 0.216112658 | -0.046265793 | 0.082 |

|         |             |              |       |
|---------|-------------|--------------|-------|
| Yipf1   | 0.216225398 | 0.002278603  | 0.072 |
| Nsmce4a | 0.216476225 | -0.0778191   | 0.049 |
| Ppig    | 0.217071612 | -0.01482701  | 0.172 |
| Eapp    | 0.217376673 | 0.023463797  | 0.102 |
| Csnk2b  | 0.219295564 | 0.016712023  | 0.086 |
| Rtf1    | 0.21987822  | -0.090306862 | 0.131 |
| Tmem109 | 0.220127843 | -0.149262168 | 0.093 |
| Fnbp4   | 0.220657829 | 0.033884843  | 0.068 |
| Txndc9  | 0.221619106 | -0.118251081 | 0.092 |
| Capza2  | 0.222174413 | -0.052865155 | 0.2   |
| Ssr3    | 0.222367181 | -0.009132696 | 0.201 |
| Map2k2  | 0.222652126 | 0.034542733  | 0.148 |
| Tmub2   | 0.223551291 | -0.07330764  | 0.045 |
| Rpl30   | 0.224976307 | 0.021925238  | 0.152 |
| Timm10b | 0.225300382 | -0.049115447 | 0.068 |
| Eif4e3  | 0.229945461 | -0.082428042 | 0.061 |
| Elp5    | 0.23039819  | -0.102059432 | 0.066 |
| Tmed1   | 0.230823197 | -0.126770021 | 0.064 |
| G6pc3   | 0.231915092 | 0.007937331  | 0.061 |
| Ikbip   | 0.232163247 | -0.108985875 | 0.072 |
| Ppp6c   | 0.234075912 | 0.039546287  | 0.054 |
| Yif1a   | 0.234231291 | 0.012533753  | 0.112 |
| Pfdn2   | 0.234508745 | -0.07386054  | 0.106 |
| Fh1     | 0.234807099 | -0.091846795 | 0.068 |
| Echs1   | 0.235452411 | 0.013420143  | 0.162 |
| Mrpl27  | 0.235806524 | -0.137502764 | 0.123 |
| Bcl10   | 0.235920062 | -0.07494772  | 0.046 |
| Spg21   | 0.238093126 | -0.054382961 | 0.056 |
| Ube2d2a | 0.238896676 | 0.016401764  | 0.076 |
| Abhd14a | 0.239768119 | -0.076095034 | 0.102 |
| Hnrnpa0 | 0.240371232 | -0.063210289 | 0.063 |
| Atp6v1f | 0.240688486 | -0.064029249 | 0.269 |
| Nrd1    | 0.240844025 | -0.032503713 | 0.085 |
| Ywhag   | 0.242161553 | -0.11852522  | 0.109 |
| Rpl27a  | 0.242340224 | -0.048162154 | 0.099 |
| Snrpa1  | 0.242940142 | -0.016303019 | 0.062 |
| Cdc123  | 0.243861399 | -0.109343775 | 0.093 |
| Mvd     | 0.244012769 | -0.076534826 | 0.066 |
| Aldh3b1 | 0.244375323 | -0.028551742 | 0.057 |
| Vps41   | 0.246891927 | -0.00606815  | 0.082 |
| Irf2bpl | 0.247059171 | 0.039391451  | 0.076 |
| R3hdm1  | 0.248190798 | 0.032330346  | 0.063 |
| Tmed4   | 0.248496839 | -0.10667193  | 0.115 |

|               |             |              |       |
|---------------|-------------|--------------|-------|
| Imp3          | 0.250828276 | -0.021416705 | 0.109 |
| Mtfr1l        | 0.250884032 | 0.025693934  | 0.111 |
| Apex1         | 0.252901965 | -0.009168986 | 0.053 |
| Sept2         | 0.254813551 | -0.010836296 | 0.227 |
| Pdhb          | 0.255057068 | -0.031470791 | 0.079 |
| Vgll3         | 0.259971684 | -0.191463719 | 0.072 |
| Mrpl42        | 0.260006497 | 0.009510176  | 0.171 |
| Gm2a          | 0.261005807 | 0.036487659  | 0.133 |
| 9330159F19Rik | 0.2629306   | -0.100327123 | 0.045 |
| Cr1l          | 0.264103074 | -0.046850693 | 0.073 |
| Mrpl18        | 0.265054436 | 0.064739838  | 0.133 |
| Dlat          | 0.265458379 | -0.009170164 | 0.068 |
| Pole4         | 0.26659121  | -0.112799684 | 0.057 |
| 1810043H04Rik | 0.266722471 | -0.008711654 | 0.065 |
| Ctr9          | 0.267221177 | -0.161904195 | 0.051 |
| Ktn1          | 0.267558187 | 0.01063656   | 0.202 |
| Prpsap1       | 0.267774764 | -0.054918183 | 0.077 |
| Smap1         | 0.267837875 | -0.120053787 | 0.124 |
| Chrac1        | 0.268283577 | -0.050662783 | 0.052 |
| Cmpk1         | 0.268385867 | -0.04278134  | 0.086 |
| Ddx50         | 0.268643073 | 0.003868981  | 0.066 |
| Sltm          | 0.268711775 | -0.151093753 | 0.118 |
| Gna11         | 0.269203265 | 0.028685776  | 0.054 |
| Gnai3         | 0.269316104 | -0.062746221 | 0.101 |
| Tsn           | 0.269397366 | -0.050438879 | 0.159 |
| Atg12         | 0.269797829 | 0.013536642  | 0.062 |
| 1110001A16Rik | 0.273042716 | -0.122415662 | 0.058 |
| Insig2        | 0.273777243 | -0.001558145 | 0.062 |
| 1110032A03Rik | 0.273888079 | -0.018364532 | 0.073 |
| S100a4        | 0.274061482 | -0.006570196 | 0.322 |
| Ift20         | 0.27423812  | -0.110204758 | 0.148 |
| Uri1          | 0.274466747 | -0.045769667 | 0.059 |
| Plod3         | 0.275413284 | -0.009351543 | 0.062 |
| Rpl14         | 0.27600511  | 0.032339174  | 0.392 |
| Smc5          | 0.276559508 | 0.038154638  | 0.071 |
| Dpm1          | 0.276839805 | -0.012778985 | 0.058 |
| Gcc2          | 0.277102065 | 0.009303886  | 0.051 |
| Stk16         | 0.277624652 | -0.102566944 | 0.073 |
| Hbp1          | 0.277987169 | -0.020096836 | 0.103 |
| Mcf2          | 0.278136488 | -0.034619417 | 0.069 |
| Lss           | 0.278341767 | 0.00179744   | 0.071 |
| Ctge5         | 0.279593168 | 0.044177851  | 0.09  |
| Acbd3         | 0.282120503 | 0.01310127   | 0.079 |

|               |             |              |       |
|---------------|-------------|--------------|-------|
| Adamts5       | 0.282189772 | -0.042850665 | 0.196 |
| 2010107E04Rik | 0.283102292 | -0.057965703 | 0.235 |
| Ckap4         | 0.284813355 | -0.174353504 | 0.054 |
| Fkbp8         | 0.287593001 | 0.011844005  | 0.126 |
| Ist1          | 0.29054789  | -0.047910039 | 0.066 |
| Ran           | 0.294070008 | -0.049537384 | 0.127 |
| Snw1          | 0.295023062 | 0.002393638  | 0.201 |
| Mat2b         | 0.29524098  | -0.034519076 | 0.078 |
| Sertad2       | 0.295279705 | 0.025281516  | 0.059 |
| Actn4         | 0.295362315 | -0.072821206 | 0.155 |
| Hgs           | 0.295551452 | -0.031725181 | 0.059 |
| Pard6g        | 0.297485505 | 0.017030839  | 0.059 |
| Mia3          | 0.299518666 | 0.001891848  | 0.082 |
| Dnajc19       | 0.30008142  | -0.034373848 | 0.113 |
| Dock1         | 0.3011347   | -0.034265469 | 0.062 |
| Commd4        | 0.301672105 | 0.000490583  | 0.103 |
| Gphn          | 0.302152582 | 0.007755082  | 0.063 |
| Cnpy3         | 0.30727521  | -0.070070282 | 0.05  |
| Vps26a        | 0.307641167 | -0.006631169 | 0.076 |
| Psmg4         | 0.308390184 | -0.0553388   | 0.048 |
| Mrps26        | 0.309204762 | -0.000491537 | 0.073 |
| Dpy30         | 0.312564194 | -0.073621028 | 0.096 |
| Thap11        | 0.312578077 | -0.042233855 | 0.047 |
| Cops3         | 0.313180945 | -0.051307097 | 0.058 |
| Vamp4         | 0.31426675  | -0.017112769 | 0.073 |
| Dld           | 0.315098265 | -0.079777701 | 0.089 |
| Dnajc2        | 0.315322865 | -0.065590879 | 0.062 |
| Spag7         | 0.315332546 | -0.095942994 | 0.06  |
| Taf7          | 0.316185749 | -0.038510569 | 0.05  |
| Smim14        | 0.317026229 | -0.043846155 | 0.223 |
| Frg1          | 0.318264261 | -0.055971179 | 0.079 |
| 2210016L21Rik | 0.318746124 | -0.08491338  | 0.135 |
| Rabggtb       | 0.322025893 | -0.090346421 | 0.068 |
| Txnl4a        | 0.322240733 | -0.076213235 | 0.071 |
| Ric8          | 0.322770214 | -0.044358978 | 0.045 |
| Sepp1         | 0.323598272 | -0.023059924 | 0.634 |
| Irak1         | 0.323689388 | -0.052194992 | 0.049 |
| Rbm28         | 0.325186659 | 0.01641744   | 0.075 |
| Bbip1         | 0.325252926 | -0.142796174 | 0.134 |
| Emd           | 0.327482542 | -0.004689815 | 0.068 |
| Fam104a       | 0.327821496 | -0.095919924 | 0.131 |
| Zfml          | 0.327884406 | -0.097871635 | 0.121 |
| Ptbp3         | 0.33041376  | -0.096785309 | 0.045 |

|          |             |              |       |
|----------|-------------|--------------|-------|
| Mrpl30   | 0.330692891 | -0.136585203 | 0.12  |
| Tlk2     | 0.330711152 | 0.01480762   | 0.051 |
| Mrpl54   | 0.330933484 | -0.067291925 | 0.084 |
| Nemf     | 0.3311738   | 0.025667624  | 0.112 |
| Scarb1   | 0.33123882  | 0.002649215  | 0.087 |
| Chmp4b   | 0.331378571 | -0.074988368 | 0.146 |
| Rpl22    | 0.33230072  | -0.007399501 | 0.281 |
| Slc12a2  | 0.332679471 | 9.54E-05     | 0.179 |
| Sort1    | 0.332722959 | -0.04881105  | 0.051 |
| Samd4    | 0.333770813 | 0.023251045  | 0.06  |
| Papola   | 0.336038687 | -0.120729285 | 0.122 |
| Srp72    | 0.337193843 | -0.088958296 | 0.104 |
| Mrpl49   | 0.337627617 | -0.063540143 | 0.052 |
| Urod     | 0.339172767 | -0.030197737 | 0.055 |
| Al462493 | 0.342249729 | -0.087703178 | 0.081 |
| Scamp2   | 0.34229399  | -0.073865214 | 0.137 |
| Ganab    | 0.343354798 | -0.108206054 | 0.057 |
| Rnf11    | 0.344618625 | -0.151117689 | 0.051 |
| Pfkm     | 0.345385141 | 0.000605566  | 0.066 |
| Dctn6    | 0.345904243 | -0.020041294 | 0.11  |
| Bzw1     | 0.346901664 | -0.031494254 | 0.128 |
| Mrpl9    | 0.34772717  | -0.116509525 | 0.052 |
| Derl1    | 0.348151978 | -0.130810688 | 0.089 |
| Lsm12    | 0.348174835 | 0.023110111  | 0.059 |
| Grsf1    | 0.34839704  | -0.085079771 | 0.073 |
| Tmem222  | 0.35342114  | -0.042845653 | 0.059 |
| Litaf    | 0.353460169 | -0.073369132 | 0.194 |
| Emc9     | 0.354547866 | -0.054434869 | 0.051 |
| Rps11    | 0.355212798 | 0.020886871  | 0.463 |
| Rps10    | 0.356032913 | -0.011369178 | 0.33  |
| Phax     | 0.357202866 | -0.001883919 | 0.115 |
| Erp29    | 0.357383384 | -0.082389451 | 0.152 |
| Psmc2    | 0.358589956 | -0.091464562 | 0.144 |
| Coq9     | 0.361326302 | -0.003140811 | 0.065 |
| Chmp5    | 0.361474458 | 0.087027025  | 0.191 |
| Fcf1     | 0.362413743 | -0.077670115 | 0.077 |
| Arl8b    | 0.36278146  | -0.025174855 | 0.12  |
| Atp5k    | 0.36323403  | -0.022165164 | 0.148 |
| Smek2    | 0.363851359 | -0.053174385 | 0.084 |
| Scfd1    | 0.36445265  | -0.048778098 | 0.065 |
| Keap1    | 0.365257657 | -0.125046033 | 0.06  |
| Celsr2   | 0.365794337 | -0.001523188 | 0.057 |
| Cxx1c    | 0.367658719 | -0.007259965 | 0.058 |

|         |             |              |       |
|---------|-------------|--------------|-------|
| Ola1    | 0.36854839  | -0.037383883 | 0.083 |
| Tra2b   | 0.36890896  | -0.01180816  | 0.094 |
| Smyd2   | 0.36895006  | -0.088835708 | 0.065 |
| Nsd1    | 0.369441442 | 0.005882014  | 0.066 |
| Uba52   | 0.371691677 | 0.033991884  | 0.149 |
| Mrps11  | 0.372149185 | -0.070315568 | 0.047 |
| Nagk    | 0.373223251 | -0.014278911 | 0.07  |
| Ube2d3  | 0.37437054  | -0.09066843  | 0.142 |
| Gltscr2 | 0.374377244 | -0.013138945 | 0.119 |
| Cnot8   | 0.375142158 | 0.027784054  | 0.07  |
| Nkiras1 | 0.376745286 | -0.025224393 | 0.051 |
| Drg1    | 0.37760014  | -0.099637572 | 0.056 |
| Stx4a   | 0.378628112 | -0.090190938 | 0.138 |
| Nolc1   | 0.379045429 | -0.150259566 | 0.097 |
| Snrpn   | 0.379316528 | 0.10869217   | 0.078 |
| Gid8    | 0.38272014  | -0.055791198 | 0.053 |
| Ndnl2   | 0.38285854  | -0.114065368 | 0.057 |
| Znrd1   | 0.38312077  | -0.064670744 | 0.076 |
| Psm1    | 0.384618863 | -0.111146716 | 0.129 |
| Esf1    | 0.38483349  | -0.070478706 | 0.102 |
| mt-Rnr1 | 0.385572807 | -0.002172398 | 0.311 |
| Slc35a1 | 0.389833517 | -0.073944959 | 0.074 |
| Mllt11  | 0.39095235  | -0.169084977 | 0.053 |
| Ezh2    | 0.391632936 | -0.058088922 | 0.048 |
| Tnpo3   | 0.392294484 | -0.010718629 | 0.052 |
| Slc43a2 | 0.393697562 | -0.005122663 | 0.06  |
| Lamp2   | 0.393898307 | -0.074417959 | 0.26  |
| Mob1a   | 0.395489146 | -0.025801674 | 0.058 |
| Ppp2r5c | 0.39589524  | -0.093053819 | 0.07  |
| Sil1    | 0.397618659 | -0.095369554 | 0.051 |
| Use1    | 0.398300704 | -0.146218113 | 0.171 |
| Tmem9b  | 0.398728892 | -0.077619874 | 0.17  |
| Ict1    | 0.399195689 | -0.069108583 | 0.14  |
| Timm50  | 0.401794764 | -0.106514463 | 0.048 |
| Mcee    | 0.402952395 | -0.095056574 | 0.132 |
| Ttc1    | 0.406492917 | -0.035863166 | 0.072 |
| Rap1a   | 0.407145999 | -0.114517051 | 0.211 |
| Agpat3  | 0.407150597 | -0.002134052 | 0.1   |
| Kat2b   | 0.409949591 | -0.033549033 | 0.075 |
| Zmat5   | 0.412393639 | -0.010687419 | 0.072 |
| Sssca1  | 0.412866978 | -0.020761164 | 0.055 |
| Ndst1   | 0.413825657 | -0.053913921 | 0.065 |
| Fbxl4   | 0.415060076 | -0.008179398 | 0.056 |

|          |             |              |       |
|----------|-------------|--------------|-------|
| Ykt6     | 0.415158222 | -0.03877075  | 0.06  |
| Tor1a    | 0.415997508 | -0.103318257 | 0.048 |
| Smchd1   | 0.417122604 | -0.035854124 | 0.053 |
| Skiv2l   | 0.419515883 | -0.081007329 | 0.053 |
| Poldip2  | 0.419815646 | -0.04450075  | 0.053 |
| Otub1    | 0.420385949 | -0.004927596 | 0.059 |
| Acadsb   | 0.420659057 | -0.106545114 | 0.053 |
| Tmem167  | 0.421160952 | -0.049364932 | 0.084 |
| Set      | 0.421461327 | -0.061326277 | 0.076 |
| Emc3     | 0.421774032 | -0.020889705 | 0.109 |
| Ppia     | 0.42412779  | -0.048850815 | 0.181 |
| Sdha     | 0.424539148 | -0.112913066 | 0.149 |
| Pten     | 0.424887462 | -0.08658572  | 0.061 |
| Arl2     | 0.42542214  | -0.083797328 | 0.139 |
| Letm1    | 0.42647048  | -0.077442675 | 0.074 |
| Gnpda2   | 0.426664878 | -0.099837957 | 0.069 |
| Gpr108   | 0.426699436 | -0.080590542 | 0.06  |
| Prkag1   | 0.427210453 | -0.048534921 | 0.076 |
| Sbds     | 0.427459923 | -0.068883192 | 0.213 |
| Phf5a    | 0.428067398 | -0.161744265 | 0.102 |
| Clasp2   | 0.429468753 | 0.013626883  | 0.099 |
| Stt3a    | 0.431265997 | -0.008453724 | 0.085 |
| Zdhhc4   | 0.432232372 | -0.082707618 | 0.047 |
| Ppp1r11  | 0.433749527 | -0.058095775 | 0.091 |
| Pa2g4    | 0.433897872 | -0.091166831 | 0.146 |
| Bnip2    | 0.434838501 | -0.067730039 | 0.151 |
| Phf3     | 0.435116934 | -0.075157398 | 0.062 |
| Cox8a    | 0.437806827 | -0.003349054 | 0.473 |
| Maf1     | 0.438434374 | -0.163365886 | 0.11  |
| Sdhc     | 0.438577721 | -0.043565041 | 0.207 |
| Ddx1     | 0.439703021 | -0.021556985 | 0.093 |
| Tm9sf3   | 0.44474446  | -0.154224378 | 0.178 |
| Chmp1a   | 0.446343801 | -0.106233128 | 0.049 |
| Ube2a    | 0.447102068 | -0.059774997 | 0.089 |
| Copz2    | 0.447168933 | -0.069595101 | 0.097 |
| Rps19bp1 | 0.448170664 | -0.029886216 | 0.059 |
| Asf1a    | 0.44915964  | -0.107908259 | 0.067 |
| Armc1    | 0.451233987 | -0.017468236 | 0.087 |
| Dcald    | 0.451372301 | -0.089732825 | 0.048 |
| Mcl1     | 0.452263358 | 0.019467627  | 0.056 |
| Polr1d   | 0.45340949  | -0.062694269 | 0.125 |
| Ndufc1   | 0.454533633 | -0.032318636 | 0.196 |
| Slirp    | 0.455541644 | -0.104777903 | 0.098 |



|               |             |              |       |
|---------------|-------------|--------------|-------|
| Strap         | 0.456706663 | -0.072348721 | 0.105 |
| Mapk1         | 0.458700098 | -0.022899248 | 0.085 |
| Sec13         | 0.459046965 | -0.096194803 | 0.15  |
| Dtymk         | 0.460326101 | -0.065494572 | 0.076 |
| Nono          | 0.460931347 | -0.089866487 | 0.059 |
| Ttc3          | 0.46142647  | -0.014783584 | 0.197 |
| Psm11         | 0.461619172 | -0.05943614  | 0.118 |
| Clns1a        | 0.462016666 | 0.022249753  | 0.071 |
| Scoc          | 0.462056138 | -0.130335396 | 0.085 |
| 1110051M20Rik | 0.462493828 | -0.072423809 | 0.056 |
| Wipi1         | 0.46419891  | 0.008166617  | 0.166 |
| Psm4          | 0.465528028 | -0.08998164  | 0.166 |
| Rsrc1         | 0.466053834 | 0.036214265  | 0.076 |
| Txndc16       | 0.467209273 | -0.047721259 | 0.084 |
| Stard4        | 0.467267556 | -0.001245232 | 0.064 |
| Ublcp1        | 0.467727378 | -0.049221307 | 0.068 |
| Snf8          | 0.467899559 | -0.036212379 | 0.052 |
| BC031181      | 0.469863117 | -0.056074763 | 0.203 |
| Rab6b         | 0.470873272 | 0.023132373  | 0.097 |
| Cxx1b         | 0.471147903 | -0.057871481 | 0.094 |
| Rps24         | 0.473395665 | 0.034327517  | 0.385 |
| Fxyd7         | 0.474621845 | -0.101179891 | 0.074 |
| Clcn4-2       | 0.475014723 | -0.018174753 | 0.113 |
| Cops5         | 0.476494752 | -0.121915456 | 0.072 |
| Mrpl52        | 0.479073738 | -0.031277951 | 0.125 |
| March5        | 0.479313446 | 0.017736699  | 0.056 |
| Dhx15         | 0.479669741 | -0.029539946 | 0.085 |
| Rangap1       | 0.479966353 | -0.093043086 | 0.062 |
| Tvp23b        | 0.480027745 | -0.098727046 | 0.064 |
| Vcp           | 0.480365668 | -0.009626202 | 0.153 |
| Cnep1r1       | 0.484705935 | -0.120874626 | 0.082 |
| Smim7         | 0.485337839 | -0.043336025 | 0.13  |
| Snta1         | 0.485776206 | -0.071386651 | 0.115 |
| Smarcc2       | 0.485897862 | -0.013302926 | 0.13  |
| Wwtr1         | 0.486458348 | -0.032361327 | 0.084 |
| Ubl5          | 0.487799914 | -0.03646255  | 0.181 |
| Vps4a         | 0.488190937 | -0.069678725 | 0.059 |
| Zcrb1         | 0.490055623 | -0.019682074 | 0.149 |
| Clptm1l       | 0.490091108 | -0.072174936 | 0.094 |
| Bola1         | 0.491627487 | -0.091930976 | 0.058 |
| Ufl1          | 0.491839343 | -0.025179618 | 0.063 |
| Chmp3         | 0.492184447 | -0.070616562 | 0.102 |
| Ndufa10       | 0.493520494 | 0.016102222  | 0.206 |

|             |             |              |       |
|-------------|-------------|--------------|-------|
| Abhd16a     | 0.494786117 | -0.039301848 | 0.075 |
| Stim1       | 0.496057878 | -0.037950097 | 0.053 |
| Plscr3      | 0.49807232  | -0.047221878 | 0.069 |
| Actr2       | 0.501603023 | -0.125111781 | 0.105 |
| Rtcb        | 0.501693566 | -0.098927884 | 0.071 |
| Rrp1        | 0.501936384 | -0.107235052 | 0.219 |
| Hspa4       | 0.502050131 | -0.070425161 | 0.122 |
| Immp1l      | 0.506604868 | -0.043596388 | 0.082 |
| Ranbp1      | 0.507011286 | -0.030240784 | 0.237 |
| Smndc1      | 0.507185632 | -0.070890656 | 0.077 |
| Eef1g       | 0.507197323 | -0.074128112 | 0.146 |
| Caml        | 0.507675876 | -0.125867954 | 0.059 |
| Cyth2       | 0.508231834 | -0.048844326 | 0.091 |
| Tax1bp1     | 0.508466732 | 0.03437416   | 0.391 |
| Mtch2       | 0.509105535 | -0.088614574 | 0.113 |
| Phlda1      | 0.509413911 | 0.052374593  | 0.16  |
| Cct6a       | 0.51065648  | -0.126858413 | 0.118 |
| Utp3        | 0.513957148 | -0.050017237 | 0.071 |
| Wbp11       | 0.514835015 | 0.054831103  | 0.085 |
| Nabp2       | 0.520343529 | -0.049744922 | 0.072 |
| Lonp1       | 0.520598589 | -0.123360284 | 0.056 |
| Fbxo9       | 0.522225938 | -0.024436552 | 0.064 |
| Otud6b      | 0.523322474 | -0.064151951 | 0.055 |
| Nbr1        | 0.523760146 | -0.045777184 | 0.061 |
| Eif4e2      | 0.525631789 | -0.071984729 | 0.05  |
| Srek1ip1    | 0.528107839 | -0.01333812  | 0.052 |
| Bccip       | 0.529365058 | -0.091761486 | 0.076 |
| Rab24       | 0.529441507 | 0.040487002  | 0.094 |
| Ndufs7      | 0.530300508 | -0.017151924 | 0.232 |
| D19Bwg1357e | 0.532190882 | 0.020603623  | 0.088 |
| Paip1       | 0.532847935 | 0.012500824  | 0.083 |
| Pcyt1a      | 0.535543721 | -0.073368392 | 0.057 |
| Ap3b1       | 0.535798792 | -0.074720323 | 0.055 |
| mt-Rnr2     | 0.536226008 | 0.017242251  | 0.983 |
| Chmp2b      | 0.536902148 | -0.112878063 | 0.109 |
| Serpib6a    | 0.537446001 | -0.023016824 | 0.159 |
| Pbrm1       | 0.537989704 | -0.036153106 | 0.119 |
| Nol12       | 0.538381718 | -0.040000714 | 0.054 |
| Gkap1       | 0.538446713 | -0.013836172 | 0.093 |
| Creld2      | 0.538774723 | -0.056450151 | 0.078 |
| Ctnn        | 0.540200269 | -0.059535113 | 0.068 |
| Nfe2l1      | 0.541330546 | -0.055201507 | 0.091 |
| Brd4        | 0.541455667 | 0.010796226  | 0.069 |

|         |             |              |       |
|---------|-------------|--------------|-------|
| Iscu    | 0.542659574 | -0.091911112 | 0.088 |
| Mllt10  | 0.54600167  | -0.049271143 | 0.052 |
| Blmh    | 0.546036252 | -0.085307675 | 0.062 |
| Btbd3   | 0.547020763 | 0.091566662  | 0.057 |
| Ifrd1   | 0.547587767 | -0.09667407  | 0.095 |
| Stk11   | 0.54861114  | 0.019443275  | 0.066 |
| U2af1l4 | 0.548888651 | -0.100359051 | 0.066 |
| Pdzd11  | 0.549257033 | -0.031519571 | 0.09  |
| Ap3d1   | 0.549419643 | -0.055528652 | 0.066 |
| Gbas    | 0.54982938  | -0.108578999 | 0.132 |
| Rab33b  | 0.549910027 | -0.037838309 | 0.053 |
| Impad1  | 0.550907135 | -0.069517323 | 0.059 |
| Usmg5   | 0.551867427 | 0.034527488  | 0.054 |
| Ndufaf3 | 0.552185733 | 0.013496294  | 0.056 |
| Slc30a9 | 0.553294936 | -0.099355737 | 0.075 |
| Vamp3   | 0.555479053 | -0.019196056 | 0.107 |
| Sat1    | 0.555986162 | -0.038893829 | 0.501 |
| Nop58   | 0.557707092 | -0.052325321 | 0.076 |
| Atp5l   | 0.564457731 | -0.01661201  | 0.048 |
| Glrx2   | 0.564662688 | -0.017137822 | 0.081 |
| Gigyf2  | 0.564986742 | -0.009729282 | 0.066 |
| Rab7    | 0.565247396 | -0.062043986 | 0.231 |
| Dkc1    | 0.570170799 | -0.079985275 | 0.062 |
| Hook3   | 0.57117715  | -0.000612121 | 0.094 |
| Commd7  | 0.571578585 | -0.107534862 | 0.063 |
| Zmynd8  | 0.571602593 | -0.006168935 | 0.077 |
| Arhgef9 | 0.573079892 | -0.027238735 | 0.058 |
| Hnrnpr  | 0.575992623 | -0.116241728 | 0.135 |
| Snhg1   | 0.577137516 | -0.055566338 | 0.054 |
| Wwp1    | 0.578682204 | -0.254584611 | 0.092 |
| Ppfibp2 | 0.579603152 | -0.14374211  | 0.05  |
| Zc3h13  | 0.579785791 | -0.074285448 | 0.109 |
| Haghl   | 0.579951351 | -0.030109607 | 0.06  |
| Mier1   | 0.580732675 | -0.005366838 | 0.072 |
| Ndufaf2 | 0.580986628 | -0.036298192 | 0.057 |
| Sfpq    | 0.581004314 | -0.018871457 | 0.095 |
| Praf2   | 0.5868943   | -0.007394365 | 0.067 |
| Dctn5   | 0.586897348 | -0.03006959  | 0.065 |
| Ggnbp2  | 0.587925553 | -0.078158575 | 0.127 |
| Ssbp1   | 0.58828628  | 0.010978631  | 0.075 |
| Atp6v1d | 0.589403509 | -0.073986642 | 0.138 |
| Eif4a3  | 0.58986578  | -0.025257463 | 0.138 |
| Ilf2    | 0.591966865 | -0.097647826 | 0.084 |

|               |             |              |       |
|---------------|-------------|--------------|-------|
| 2310033P09Rik | 0.592382922 | -0.013449211 | 0.062 |
| Ubtf          | 0.594109201 | -0.024991324 | 0.114 |
| Eif1ax        | 0.595162537 | -0.07900592  | 0.122 |
| Cwc15         | 0.595996146 | -0.018744121 | 0.281 |
| Eprs          | 0.597545593 | -0.056072027 | 0.131 |
| Ppil2         | 0.598245264 | -0.027181455 | 0.053 |
| Prkacb        | 0.598324715 | -0.054486674 | 0.05  |
| Serp1         | 0.598480268 | -0.083457412 | 0.118 |
| Eif6          | 0.600211558 | -0.110676138 | 0.09  |
| Lage3         | 0.602246955 | -0.015896263 | 0.081 |
| Smarcb1       | 0.607416003 | -0.063313358 | 0.108 |
| Tbca          | 0.607507419 | -0.032866213 | 0.166 |
| Hmgcl         | 0.607783227 | -0.07529829  | 0.056 |
| Smpd1         | 0.608350266 | -0.11734067  | 0.059 |
| Rbm27         | 0.611261946 | -0.064021082 | 0.054 |
| Rtfdc1        | 0.611783731 | -0.076799283 | 0.095 |
| Fam213b       | 0.612318301 | -0.150366457 | 0.059 |
| Fam213a       | 0.613404362 | 0.033207613  | 0.15  |
| Ptgr2         | 0.613824014 | -0.055503188 | 0.063 |
| Zmat2         | 0.614387942 | -0.051313829 | 0.14  |
| Ddrk1         | 0.614849553 | -0.047476718 | 0.207 |
| 1110004F10Rik | 0.61525503  | -0.111348111 | 0.159 |
| Nme2          | 0.61555949  | 0.044706578  | 0.057 |
| Ddb1          | 0.616845066 | -0.086619571 | 0.119 |
| Psm3          | 0.617799773 | -0.057694973 | 0.081 |
| Snx4          | 0.617966449 | -0.091472774 | 0.086 |
| Enoph1        | 0.61871181  | -0.042650571 | 0.075 |
| Cops7a        | 0.618893436 | -0.002729413 | 0.075 |
| Phb2          | 0.6196122   | -0.020255401 | 0.108 |
| Tpt1          | 0.620409121 | -0.080916997 | 0.106 |
| Rbm6          | 0.622384801 | -0.05473725  | 0.058 |
| Hnrnpk        | 0.624805108 | -0.059449271 | 0.263 |
| Snap25        | 0.625667443 | -0.006493767 | 0.072 |
| Klf7          | 0.625907708 | -0.024644629 | 0.107 |
| B3gnt1        | 0.626113051 | -0.063324029 | 0.094 |
| Ahsa1         | 0.626173273 | -0.107099721 | 0.131 |
| Dctn3         | 0.626268345 | -0.05530829  | 0.21  |
| Fam174a       | 0.62645701  | -0.065427057 | 0.114 |
| Pih1d1        | 0.626551343 | -0.082127158 | 0.055 |
| Anp32b        | 0.628650588 | -0.010540572 | 0.248 |
| Tmx2          | 0.629755155 | -0.041770386 | 0.077 |
| Tex261        | 0.632126668 | -0.024543288 | 0.072 |
| Glyr1         | 0.63219189  | -0.122653479 | 0.061 |

|               |             |              |       |
|---------------|-------------|--------------|-------|
| Txnip         | 0.632809617 | -0.158764882 | 0.106 |
| Atp5e         | 0.633639876 | -0.002827183 | 0.312 |
| Rtn1          | 0.638625546 | -0.090504923 | 0.119 |
| Naa50         | 0.639684792 | -0.003700183 | 0.088 |
| 2810004N23Rik | 0.640164824 | -0.056242106 | 0.058 |
| Ppp5c         | 0.641299109 | -0.043363812 | 0.054 |
| Cyc1          | 0.644683173 | -0.051868855 | 0.201 |
| Rela          | 0.645281091 | -0.101340804 | 0.065 |
| Emc6          | 0.645433326 | -0.006934589 | 0.115 |
| Tuba1a        | 0.647584314 | 0.010408254  | 0.711 |
| Rap1b         | 0.64786615  | -0.058041669 | 0.07  |
| Elavl1        | 0.649192081 | -0.099445647 | 0.071 |
| Ppid          | 0.649410022 | 0.044243267  | 0.071 |
| Commd10       | 0.64997612  | 0.004878475  | 0.055 |
| Ap1m1         | 0.651084831 | 0.000962855  | 0.051 |
| Gtpbp4        | 0.65235062  | -0.033708858 | 0.067 |
| Rae1          | 0.656905752 | -0.011595202 | 0.069 |
| Lym5          | 0.6573791   | -0.025561427 | 0.062 |
| Cdipt         | 0.65775431  | -0.08296781  | 0.072 |
| Tor1b         | 0.65776284  | -0.086223589 | 0.051 |
| Coq7          | 0.658479377 | -0.032881096 | 0.078 |
| Rsf1          | 0.658486738 | -0.111553083 | 0.082 |
| Ypel5         | 0.66032129  | -0.094854799 | 0.07  |
| Elf1          | 0.662119156 | -0.115183889 | 0.049 |
| Sub1          | 0.664204302 | 0.017177257  | 0.253 |
| Atxn10        | 0.665064625 | -0.082036363 | 0.195 |
| Lamtor2       | 0.666606443 | 0.055278725  | 0.101 |
| Rpl39         | 0.667822431 | -0.027991357 | 0.145 |
| C1qbp         | 0.670364797 | -0.11461359  | 0.117 |
| Sod3          | 0.674645667 | -0.011058559 | 0.106 |
| Coa6          | 0.674735613 | -0.115777008 | 0.058 |
| Tmx1          | 0.675962793 | -0.063362785 | 0.051 |
| G3bp1         | 0.67681721  | -0.049574471 | 0.069 |
| Dazap2        | 0.676961667 | -0.054668247 | 0.237 |
| Cdk5          | 0.67711064  | -0.02422629  | 0.073 |
| Eif4g3        | 0.678030487 | -0.020396349 | 0.115 |
| Naa10         | 0.678916149 | -0.021018329 | 0.059 |
| Mfap1b        | 0.681202634 | -0.004195044 | 0.051 |
| Kdm1a         | 0.682002764 | -0.051841636 | 0.054 |
| Tmx4          | 0.682311021 | -0.065187501 | 0.068 |
| Wasl          | 0.682533128 | -0.006743239 | 0.131 |
| Dctn4         | 0.684346947 | -0.042890199 | 0.053 |
| Jkamp         | 0.685557863 | -0.008157391 | 0.129 |

|          |             |              |       |
|----------|-------------|--------------|-------|
| Pitpna   | 0.686357358 | -0.039657273 | 0.072 |
| Swi5     | 0.687520131 | -0.013389208 | 0.217 |
| Tomm5    | 0.689528826 | -0.02861348  | 0.084 |
| Hdgfrp2  | 0.690199632 | -0.002945155 | 0.063 |
| Cdc42ep4 | 0.693619508 | 0.016084011  | 0.068 |
| Pcbp2    | 0.69470324  | -0.030092892 | 0.369 |
| Babam1   | 0.694828904 | -0.072039075 | 0.054 |
| Xrn2     | 0.69701253  | -0.065054552 | 0.09  |
| Rnf187   | 0.698136377 | -0.033787549 | 0.165 |
| Crk      | 0.699363545 | -0.023863367 | 0.08  |
| Prpf40a  | 0.702166701 | -0.089017539 | 0.161 |
| Ube2d1   | 0.704133732 | -0.059879909 | 0.05  |
| Dlst     | 0.706072536 | -0.078722176 | 0.058 |
| Slc25a17 | 0.708191284 | -0.021388244 | 0.066 |
| Hrsp12   | 0.708603667 | -0.029391529 | 0.076 |
| Col5a3   | 0.708823299 | -0.070089136 | 0.241 |
| Glt8d1   | 0.709323689 | 0.020075879  | 0.115 |
| Cystm1   | 0.709875722 | -0.051884922 | 0.053 |
| Ctbp1    | 0.709985155 | -0.028761613 | 0.097 |
| Uqcr10   | 0.710622403 | -0.009749099 | 0.25  |
| Ociad1   | 0.711338352 | -0.004959908 | 0.293 |
| Tmem234  | 0.712990863 | -0.084172277 | 0.266 |
| Ccdc124  | 0.713843724 | -0.032681464 | 0.155 |
| Polr2c   | 0.714383791 | -0.038278383 | 0.073 |
| Kars     | 0.714696084 | -0.032180759 | 0.051 |
| Cops4    | 0.715191928 | -0.129383015 | 0.084 |
| Ccdc55   | 0.715199014 | -0.032979863 | 0.078 |
| Sf3b2    | 0.72174854  | -0.087927441 | 0.232 |
| Fam134a  | 0.721932663 | -0.001243853 | 0.061 |
| Eif3h    | 0.723467262 | -0.044721291 | 0.177 |
| Hint2    | 0.723842724 | -0.077629705 | 0.094 |
| Mrps18c  | 0.726631761 | -0.075095402 | 0.079 |
| Dguok    | 0.728425358 | -0.09987345  | 0.053 |
| Zfr      | 0.73352064  | 0.001307496  | 0.182 |
| Cflar    | 0.734438277 | -0.035976863 | 0.051 |
| Brd3     | 0.734544854 | -0.076943138 | 0.097 |
| Ahcy1    | 0.735453817 | -0.013576262 | 0.054 |
| Baz1b    | 0.735907247 | -0.011485308 | 0.112 |
| Ilf3     | 0.73734977  | -0.062638872 | 0.059 |
| Tmem66   | 0.738591712 | -0.053692233 | 0.336 |
| Gnl3     | 0.741901621 | -0.049555895 | 0.053 |
| Zfp771   | 0.741963149 | -0.061189971 | 0.052 |
| Nsfl1c   | 0.743088463 | 0.009532343  | 0.104 |

|          |             |              |       |
|----------|-------------|--------------|-------|
| Psmc1    | 0.743394802 | -0.027512581 | 0.152 |
| Sept10   | 0.746643591 | -0.065956598 | 0.072 |
| Tcta     | 0.748079108 | -0.043152741 | 0.062 |
| Clptm1   | 0.750970895 | -0.015284393 | 0.062 |
| Lcmt1    | 0.751601822 | -0.040754071 | 0.054 |
| Mrpl24   | 0.753523755 | -0.086424058 | 0.089 |
| Golga7   | 0.755930468 | 0.097704186  | 0.096 |
| Ssr2     | 0.756717147 | -0.088399408 | 0.215 |
| Ndufa6   | 0.757962312 | -0.014746011 | 0.282 |
| Tmx3     | 0.75914538  | -0.052922492 | 0.081 |
| Osgep    | 0.763478082 | -0.107008507 | 0.09  |
| Prpf6    | 0.763979353 | -0.032407343 | 0.06  |
| Igbp1    | 0.766746819 | -0.043050181 | 0.075 |
| Ssna1    | 0.766980012 | -0.09618028  | 0.097 |
| Fam107a  | 0.768825988 | -0.198648251 | 0.065 |
| Emc10    | 0.769119537 | -0.051594385 | 0.169 |
| Pkn2     | 0.769986372 | -0.062593539 | 0.065 |
| Eif3l    | 0.772697219 | -0.03898055  | 0.104 |
| Pcolce   | 0.775292846 | -0.115657334 | 0.057 |
| Hadha    | 0.775600979 | -0.053689971 | 0.145 |
| Cbx3     | 0.77590537  | 0.060987226  | 0.066 |
| Kifap3   | 0.779005082 | -0.082508974 | 0.086 |
| Tns3     | 0.779503712 | -0.083720207 | 0.115 |
| Hnrnpab  | 0.780046569 | -0.087437385 | 0.165 |
| Tm2d1    | 0.780360667 | -0.038184353 | 0.074 |
| Tmsb4x   | 0.780778399 | 0.020076455  | 0.826 |
| Snx17    | 0.781836906 | -0.002845251 | 0.09  |
| Scyl1    | 0.782085531 | -0.066004111 | 0.06  |
| Mrpl36   | 0.782235855 | -0.049111264 | 0.128 |
| Nop14    | 0.784510444 | -0.043958955 | 0.054 |
| Rnf146   | 0.784984868 | -0.048574116 | 0.056 |
| Supt16   | 0.785257171 | -0.078948268 | 0.098 |
| Pafah1b2 | 0.786740585 | -0.072891949 | 0.079 |
| Acin1    | 0.787339382 | -0.044472151 | 0.191 |
| Rbm22    | 0.790235765 | -0.084755613 | 0.064 |
| Eif3g    | 0.790665425 | -0.094411838 | 0.159 |
| Banf1    | 0.792952421 | -0.061466435 | 0.217 |
| Bet1     | 0.796732863 | -0.078285204 | 0.091 |
| Cox20    | 0.801124317 | -0.040196576 | 0.106 |
| Actr10   | 0.802497665 | -0.045248657 | 0.093 |
| Rps21    | 0.802521528 | -0.008362042 | 0.274 |
| Gsk3b    | 0.804831953 | -0.04560312  | 0.13  |
| Zrsr2    | 0.805703499 | -0.050484448 | 0.067 |



|               |             |              |       |
|---------------|-------------|--------------|-------|
| Wdr61         | 0.808545287 | -0.070072506 | 0.093 |
| Fam21         | 0.809028034 | -0.044778539 | 0.074 |
| Sugt1         | 0.811089671 | -0.076989078 | 0.114 |
| Agpat6        | 0.812118723 | -0.083701594 | 0.055 |
| Mrpl10        | 0.813325908 | -0.017512478 | 0.054 |
| Pdcl3         | 0.814007517 | -0.088139744 | 0.087 |
| Grpel1        | 0.818170433 | -0.077621206 | 0.091 |
| Stk25         | 0.820164384 | -0.066389873 | 0.082 |
| Mark3         | 0.820368431 | -0.060215828 | 0.055 |
| Itfg1         | 0.821216304 | -0.059333055 | 0.095 |
| Naa20         | 0.821650199 | -0.025411363 | 0.061 |
| Paip2         | 0.822600912 | -0.088526284 | 0.3   |
| Immt          | 0.824016833 | -0.031057151 | 0.102 |
| Rpl4          | 0.826242759 | -0.029302019 | 0.542 |
| Hnrnpd        | 0.828226563 | 0.005788206  | 0.068 |
| Pgp           | 0.831943385 | -0.039555363 | 0.146 |
| Rps14         | 0.832062909 | -0.01503892  | 0.588 |
| Arid4b        | 0.833845543 | -0.052358464 | 0.1   |
| 2410004B18Rik | 0.835803717 | -0.050339972 | 0.069 |
| Cdk11b        | 0.835991447 | -0.010849041 | 0.192 |
| Mea1          | 0.83610824  | -0.048251629 | 0.095 |
| Timm17b       | 0.83638663  | -0.042300445 | 0.064 |
| Dnajc5        | 0.836554355 | -0.020689389 | 0.063 |
| Sf3b1         | 0.839577482 | -0.08882457  | 0.188 |
| Anxa7         | 0.839903794 | -0.034376384 | 0.085 |
| Mrpl11        | 0.841604849 | -0.041698419 | 0.069 |
| Eif3c         | 0.842174681 | 0.00566494   | 0.228 |
| Bscl2         | 0.842566737 | -0.051257675 | 0.093 |
| Cnot4         | 0.84323058  | -0.050116913 | 0.066 |
| Comt          | 0.851682533 | -0.119708118 | 0.243 |
| Clta          | 0.854508091 | -0.075599501 | 0.302 |
| Wbscr22       | 0.854665453 | -0.027427131 | 0.051 |
| S100a13       | 0.855424502 | -0.091714524 | 0.179 |
| Nap1l4        | 0.857009089 | -0.09451269  | 0.165 |
| Psmc6         | 0.857558756 | -0.100901203 | 0.106 |
| Hnrnp3        | 0.857790337 | -0.05383274  | 0.119 |
| Lrch3         | 0.858276057 | 0.015418844  | 0.054 |
| Rbbp4         | 0.862528271 | -0.045951799 | 0.208 |
| Ubc           | 0.864645029 | 0.00268627   | 0.401 |
| Oard1         | 0.866088128 | -0.051067138 | 0.057 |
| Max           | 0.869642145 | -0.052104099 | 0.076 |
| Sec61a1       | 0.870217642 | -0.035197028 | 0.076 |
| Scamp3        | 0.870612796 | -0.05227558  | 0.072 |

|          |             |              |       |
|----------|-------------|--------------|-------|
| Ubxn1    | 0.871516148 | -0.05257574  | 0.236 |
| Hcfc1r1  | 0.872896875 | -0.083734615 | 0.225 |
| Pnkd     | 0.873439638 | -0.049862123 | 0.106 |
| Ndufs6   | 0.878346328 | -0.061500607 | 0.188 |
| Irf3     | 0.879330279 | -0.07112203  | 0.058 |
| Fam173a  | 0.886704426 | -0.007332871 | 0.103 |
| Rab11a   | 0.887872069 | -0.063297    | 0.17  |
| Kpnb1    | 0.890451644 | -0.009895987 | 0.063 |
| Smdt1    | 0.893827842 | -0.03396431  | 0.303 |
| Gpatch11 | 0.896129307 | -0.033307369 | 0.052 |
| Pccb     | 0.898147697 | 0.020219385  | 0.058 |
| Vps36    | 0.900592482 | 0.004905981  | 0.081 |
| Marc2    | 0.901853938 | -0.041803953 | 0.155 |
| Thra     | 0.902341648 | -0.056063878 | 0.161 |
| Anapc16  | 0.904802333 | -0.088024468 | 0.209 |
| Cisd1    | 0.906611586 | -0.017201855 | 0.147 |
| Upf3b    | 0.909103212 | -0.039558452 | 0.077 |
| Cox7a2   | 0.913379941 | -0.018944105 | 0.381 |
| Bclaf1   | 0.918415186 | -0.1363064   | 0.121 |
| N4bp2l2  | 0.919617638 | -0.081458368 | 0.06  |
| Smu1     | 0.921560707 | -0.025195725 | 0.086 |
| Mrps7    | 0.922257191 | -0.035416598 | 0.064 |
| Eif5a    | 0.924861453 | -0.028380476 | 0.197 |
| Ube2b    | 0.924967525 | -0.101697187 | 0.188 |
| Slu7     | 0.92949657  | -0.057676839 | 0.118 |
| Rsbn1    | 0.933612724 | -0.025410335 | 0.054 |
| Psm14    | 0.937224161 | -0.086378575 | 0.106 |
| Taok3    | 0.937423725 | -0.034439196 | 0.059 |
| Ythdf2   | 0.938639074 | -0.056350218 | 0.053 |
| Leprot   | 0.940729425 | -0.066676173 | 0.162 |
| Abcd3    | 0.941729586 | -0.030898618 | 0.145 |
| Nckap1   | 0.94607655  | -0.05721131  | 0.061 |
| Abcf1    | 0.95416028  | -0.025088586 | 0.16  |
| Prdx1    | 0.954891009 | -0.011742436 | 0.579 |
| Prkar1a  | 0.956273763 | -0.057365971 | 0.287 |
| Snrpb2   | 0.957667064 | -0.06086197  | 0.078 |
| Pmpcb    | 0.962490119 | -0.062502908 | 0.096 |
| Atad1    | 0.962608973 | -0.059158423 | 0.095 |
| Tssc4    | 0.964108968 | -0.068366453 | 0.059 |
| Gtf2b    | 0.964879848 | -0.029652596 | 0.07  |
| Paics    | 0.965612278 | -0.08916127  | 0.227 |
| Sh3glb1  | 0.965762848 | -0.06710548  | 0.194 |
| Cbx1     | 0.967396187 | -0.036132204 | 0.174 |

|          |             |              |       |
|----------|-------------|--------------|-------|
| BC005624 | 0.968336019 | -0.028856031 | 0.085 |
| Metap2   | 0.970402706 | -0.058794614 | 0.167 |
| Synj2bp  | 0.974864159 | -0.053000811 | 0.068 |
| BC004004 | 0.975090757 | -0.069372497 | 0.107 |
| Ldha     | 0.975591913 | -0.076201564 | 0.146 |
| Tmem60   | 0.976155258 | -0.075492081 | 0.07  |
| Pbdc1    | 0.978264194 | -0.063771909 | 0.059 |
| Cops6    | 0.978887248 | -0.016183051 | 0.144 |
| Hras     | 0.982343351 | -0.100990083 | 0.075 |
| Rps20    | 0.983373855 | -0.028884766 | 0.284 |
| Tiprl    | 0.984711134 | -0.082121247 | 0.075 |
| Tbc1d7   | 0.98490993  | -0.136665968 | 0.072 |
| Atpif1   | 0.985932716 | -0.014454931 | 0.327 |
| Cops8    | 0.986094999 | -0.104435704 | 0.084 |
| Col15a1  | 0.987167827 | -0.096531614 | 0.053 |
| Cisd2    | 0.987821956 | -0.058182556 | 0.109 |
| Gtf2f1   | 0.9885198   | -0.038150408 | 0.102 |
| Ddx23    | 0.990160322 | -0.008372586 | 0.063 |
| Ubxn2a   | 0.990220884 | -0.04503049  | 0.058 |
| Mrps5    | 0.992893148 | -0.023470005 | 0.056 |
| Cox5b    | 0.996019124 | -0.020584477 | 0.232 |
| Wdr26    | 0.997805716 | -0.074806374 | 0.089 |
| Cast     | 0.997815245 | -0.086336489 | 0.061 |
| Fdps     | 0.998588156 | 0.035460445  | 0.245 |
| Paf1     | 0.999934915 | -0.05980911  | 0.057 |

iwann cells, related to Figure 2

The percentage of satellite glial cells where the gene is detected

"Adjusted p-value, based on bonferroni correction using all genes in the dataset"

| pct.2 | p_val_adj |
|-------|-----------|
| 0.006 | 0         |
| 0.603 | 0         |
| 0.541 | 0         |
| 0.02  | 0         |
| 0.011 | 0         |
| 0.013 | 0         |
| 0.01  | 0         |
| 0.679 | 0         |
| 0.021 | 0         |
| 0.166 | 0         |
| 0.101 | 0         |
| 0.004 | 0         |
| 0.132 | 0         |
| 0.006 | 0         |
| 0.004 | 0         |
| 0.044 | 0         |
| 0.017 | 0         |
| 0.002 | 0         |
| 0.017 | 0         |
| 0.003 | 0         |
| 0.032 | 0         |
| 0.008 | 0         |
| 0.001 | 0         |
| 0.002 | 0         |
| 0.059 | 0         |
| 0.004 | 0         |
| 0.094 | 0         |
| 0.033 | 0         |
| 0.03  | 0         |
| 0.05  | 0         |
| 0.002 | 0         |

|       |           |
|-------|-----------|
| 0.005 | 0         |
| 0.004 | 0         |
| 0.002 | 0         |
| 0.006 | 0         |
| 0.143 | 0         |
| 0.019 | 0         |
| 0.041 | 0         |
| 0.008 | 0         |
| 0.244 | 0         |
| 0.051 | 0         |
| 0.022 | 0         |
| 0.058 | 0         |
| 0.02  | 0         |
| 0.007 | 0         |
| 0.43  | 0         |
| 0.012 | 0         |
| 0.005 | 0         |
| 0.006 | 0         |
| 0.844 | 0         |
| 0.518 | 0         |
| 0.537 | 0         |
| 0.004 | 0         |
| 0.755 | 0         |
| 0.002 | 0         |
| 0.005 | 0         |
| 0.003 | 0         |
| 0.003 | 0         |
| 0.003 | 0         |
| 0.66  | 0         |
| 0.001 | 0         |
| 0.004 | 0         |
| 0.006 | 0         |
| 0     | 0         |
| 0.001 | 0         |
| 0.921 | 0         |
| 0.982 | 0         |
| 0.697 | 0         |
| 0.663 | 0         |
| 0.919 | 0         |
| 0.826 | 0         |
| 0.993 | 0         |
| 0.832 | 0         |
| 0.003 | 7.00E-301 |

|       |           |
|-------|-----------|
| 0.551 | 1.43E-294 |
| 0.11  | 7.86E-289 |
| 0.554 | 2.94E-287 |
| 0.072 | 4.50E-286 |
| 0.615 | 5.22E-286 |
| 0.176 | 9.63E-285 |
| 0.618 | 1.53E-284 |
| 0.041 | 1.68E-275 |
| 0.501 | 2.14E-275 |
| 0.004 | 6.80E-271 |
| 0.093 | 2.95E-270 |
| 0.153 | 4.81E-269 |
| 0.054 | 1.47E-267 |
| 0.163 | 6.95E-264 |
| 0.016 | 1.04E-263 |
| 0.595 | 3.79E-263 |
| 0.016 | 1.51E-258 |
| 0.517 | 1.75E-258 |
| 0.012 | 3.01E-256 |
| 0.019 | 2.27E-252 |
| 0.226 | 5.76E-252 |
| 0.002 | 2.19E-251 |
| 0.16  | 6.94E-251 |
| 0.335 | 3.51E-246 |
| 0.577 | 9.27E-242 |
| 0.524 | 6.88E-241 |
| 0.443 | 1.13E-233 |
| 0.166 | 1.18E-233 |
| 0.061 | 3.41E-233 |
| 0.005 | 5.96E-232 |
| 0.446 | 2.63E-231 |
| 0.566 | 7.30E-227 |
| 0.114 | 1.75E-226 |
| 0.007 | 6.04E-225 |
| 0.003 | 1.59E-222 |
| 0.549 | 9.90E-222 |
| 0.032 | 1.64E-220 |
| 0.002 | 1.31E-219 |
| 0.418 | 1.49E-216 |
| 0.015 | 1.97E-216 |
| 0.945 | 7.26E-216 |
| 0.063 | 1.76E-215 |
| 0     | 1.01E-214 |

|       |           |
|-------|-----------|
| 0.014 | 2.53E-209 |
| 0.632 | 7.78E-208 |
| 0.458 | 1.26E-207 |
| 0.002 | 1.21E-206 |
| 0.014 | 1.43E-206 |
| 0.017 | 2.88E-203 |
| 0.002 | 1.99E-202 |
| 0.408 | 9.15E-202 |
| 0.117 | 1.89E-201 |
| 0.007 | 5.68E-198 |
| 0.056 | 4.86E-196 |
| 0.02  | 1.13E-193 |
| 0.391 | 2.63E-193 |
| 0.051 | 7.02E-190 |
| 0.092 | 1.69E-188 |
| 0.025 | 2.64E-188 |
| 0.678 | 1.39E-186 |
| 0.051 | 8.28E-185 |
| 0.594 | 4.91E-184 |
| 0.021 | 4.14E-183 |
| 0.004 | 1.99E-182 |
| 0.579 | 4.14E-181 |
| 0     | 7.36E-181 |
| 0.923 | 7.34E-179 |
| 0.375 | 9.97E-177 |
| 0.05  | 1.42E-176 |
| 0.033 | 1.99E-176 |
| 0.368 | 2.28E-176 |
| 0.772 | 2.98E-175 |
| 0     | 1.71E-174 |
| 0.398 | 1.50E-173 |
| 0.029 | 1.32E-172 |
| 0.026 | 3.63E-172 |
| 0.033 | 1.18E-171 |
| 0.224 | 1.82E-171 |
| 0.032 | 2.07E-171 |
| 0.002 | 1.97E-169 |
| 0.866 | 2.96E-169 |
| 0.213 | 4.18E-169 |
| 0.631 | 8.22E-169 |
| 0.001 | 1.39E-168 |
| 0.011 | 3.41E-168 |
| 0.464 | 5.84E-168 |



|       |           |
|-------|-----------|
| 0.104 | 2.46E-167 |
| 0.842 | 1.36E-166 |
| 0.665 | 2.09E-166 |
| 0.05  | 6.82E-166 |
| 0.049 | 1.29E-165 |
| 0.005 | 3.81E-165 |
| 0.004 | 1.18E-164 |
| 0.001 | 1.22E-164 |
| 0.015 | 1.48E-164 |
| 0.426 | 2.03E-164 |
| 0.075 | 3.73E-164 |
| 0.007 | 4.92E-163 |
| 0.511 | 5.23E-161 |
| 0.003 | 2.21E-160 |
| 0.397 | 7.18E-159 |
| 0.049 | 2.00E-158 |
| 0.103 | 3.59E-158 |
| 0.096 | 4.01E-158 |
| 0.847 | 6.38E-158 |
| 0.547 | 8.46E-158 |
| 0.136 | 1.74E-157 |
| 0.484 | 2.48E-156 |
| 0.519 | 2.92E-156 |
| 0.029 | 4.24E-155 |
| 0.335 | 2.47E-153 |
| 0.008 | 3.18E-152 |
| 0.391 | 3.76E-152 |
| 0.343 | 5.97E-152 |
| 0.002 | 1.12E-151 |
| 0     | 5.59E-150 |
| 0     | 3.93E-147 |
| 0.083 | 1.04E-146 |
| 0.002 | 1.65E-146 |
| 0.021 | 1.96E-146 |
| 0.076 | 9.13E-146 |
| 0.335 | 3.53E-144 |
| 0.889 | 6.16E-144 |
| 0.013 | 1.90E-143 |
| 0.003 | 4.53E-143 |
| 0.056 | 5.70E-143 |
| 0.013 | 2.06E-142 |
| 0.001 | 2.78E-142 |
| 0.001 | 3.71E-142 |

|       |           |
|-------|-----------|
| 0.002 | 1.12E-140 |
| 0.332 | 4.52E-140 |
| 0.637 | 7.10E-139 |
| 0.198 | 6.22E-138 |
| 0.005 | 7.02E-137 |
| 0.059 | 2.60E-136 |
| 0.026 | 1.12E-135 |
| 0.006 | 3.90E-135 |
| 0.008 | 9.57E-135 |
| 0.583 | 5.88E-133 |
| 0.033 | 1.23E-132 |
| 0.326 | 2.27E-132 |
| 0.325 | 1.48E-131 |
| 0.318 | 4.70E-131 |
| 0.001 | 8.82E-131 |
| 0.465 | 5.07E-130 |
| 0.006 | 8.44E-130 |
| 0.314 | 1.05E-129 |
| 0.221 | 1.88E-129 |
| 0.211 | 1.91E-129 |
| 0.091 | 2.44E-129 |
| 0.044 | 6.53E-129 |
| 0.088 | 2.18E-128 |
| 0.671 | 6.99E-128 |
| 0.022 | 9.53E-128 |
| 0.045 | 1.23E-127 |
| 0.365 | 2.67E-127 |
| 0.383 | 5.63E-127 |
| 0.632 | 6.00E-127 |
| 0.117 | 6.04E-127 |
| 0.092 | 1.05E-126 |
| 0.654 | 1.43E-126 |
| 0.019 | 7.94E-124 |
| 0.047 | 1.09E-122 |
| 0.178 | 2.06E-122 |
| 0.078 | 4.03E-122 |
| 0.002 | 4.96E-122 |
| 0.486 | 8.62E-122 |
| 0.277 | 2.03E-121 |
| 0.389 | 2.40E-121 |
| 0.012 | 3.41E-120 |
| 0.283 | 7.94E-120 |
| 0.284 | 2.15E-119 |

|       |           |
|-------|-----------|
| 0.014 | 1.93E-116 |
| 0.034 | 2.34E-116 |
| 0.029 | 2.58E-116 |
| 0.123 | 1.43E-115 |
| 0.049 | 4.73E-114 |
| 0.015 | 7.68E-114 |
| 0.008 | 9.89E-114 |
| 0.274 | 8.42E-113 |
| 0.005 | 1.57E-112 |
| 0.022 | 2.24E-112 |
| 0.105 | 1.35E-110 |
| 0.363 | 3.28E-110 |
| 0.248 | 5.31E-109 |
| 0.028 | 1.13E-108 |
| 0.396 | 1.76E-108 |
| 0.263 | 2.10E-108 |
| 0.008 | 1.20E-107 |
| 0.253 | 4.39E-107 |
| 0.203 | 1.03E-106 |
| 0.06  | 1.28E-106 |
| 0.159 | 3.61E-106 |
| 0.019 | 1.10E-105 |
| 0.019 | 1.71E-105 |
| 0.022 | 6.72E-105 |
| 0.307 | 7.93E-105 |
| 0.032 | 9.35E-105 |
| 0.009 | 1.57E-104 |
| 0.002 | 2.66E-104 |
| 0.072 | 2.83E-104 |
| 0.248 | 6.35E-104 |
| 0.178 | 3.67E-103 |
| 0.119 | 5.14E-103 |
| 0.482 | 5.55E-103 |
| 0.006 | 6.75E-102 |
| 0.275 | 1.15E-100 |
| 0.008 | 1.10E-99  |
| 0.088 | 3.65E-99  |
| 0.239 | 4.70E-99  |
| 0.271 | 1.13E-98  |
| 0.232 | 1.41E-98  |
| 0.139 | 5.45E-97  |
| 0.009 | 1.34E-96  |
| 0.75  | 1.67E-96  |

|       |          |
|-------|----------|
| 0.051 | 1.24E-95 |
| 0.233 | 5.13E-95 |
| 0.017 | 1.93E-94 |
| 0.04  | 8.12E-93 |
| 0.033 | 1.00E-92 |
| 0.225 | 1.97E-92 |
| 0.005 | 2.94E-92 |
| 0.058 | 2.41E-91 |
| 0.006 | 7.28E-91 |
| 0.079 | 1.41E-90 |
| 0.39  | 1.54E-90 |
| 0.307 | 6.20E-90 |
| 0.233 | 8.59E-90 |
| 0.31  | 1.55E-89 |
| 0.224 | 1.81E-89 |
| 0.054 | 2.02E-89 |
| 0.217 | 4.83E-89 |
| 0.099 | 6.92E-88 |
| 0.242 | 9.27E-88 |
| 0.022 | 3.35E-87 |
| 0.02  | 3.91E-87 |
| 0.005 | 4.82E-87 |
| 0.014 | 1.34E-85 |
| 0.055 | 2.12E-85 |
| 0.017 | 1.01E-84 |
| 0.019 | 1.92E-84 |
| 0.161 | 2.31E-84 |
| 0.597 | 5.87E-84 |
| 0.212 | 2.75E-83 |
| 0.682 | 3.18E-82 |
| 0.38  | 7.73E-82 |
| 0.014 | 1.06E-81 |
| 0.335 | 1.07E-81 |
| 0.031 | 3.65E-81 |
| 0.027 | 2.39E-80 |
| 0.048 | 3.38E-80 |
| 0.401 | 5.20E-80 |
| 0.035 | 8.17E-80 |
| 0.033 | 1.27E-77 |
| 0.058 | 4.80E-77 |
| 0.074 | 5.02E-77 |
| 0.126 | 7.51E-77 |
| 0.004 | 8.35E-77 |

|       |          |
|-------|----------|
| 0.32  | 8.89E-77 |
| 0.02  | 2.53E-76 |
| 0.049 | 3.89E-76 |
| 0.129 | 1.76E-75 |
| 0.456 | 5.54E-75 |
| 0.2   | 6.49E-75 |
| 0.517 | 3.35E-74 |
| 0.081 | 5.06E-74 |
| 0.114 | 8.52E-74 |
| 0.014 | 9.97E-74 |
| 0.208 | 1.18E-73 |
| 0.122 | 8.33E-73 |
| 0.071 | 3.01E-72 |
| 0.006 | 4.44E-72 |
| 0.007 | 7.61E-72 |
| 0.025 | 1.71E-71 |
| 0.204 | 1.73E-71 |
| 0.049 | 2.33E-71 |
| 0.049 | 4.69E-71 |
| 0.02  | 7.39E-71 |
| 0.005 | 4.90E-70 |
| 0.212 | 5.56E-70 |
| 0.022 | 6.09E-70 |
| 0.018 | 1.60E-69 |
| 0.008 | 1.18E-68 |
| 0.174 | 1.50E-68 |
| 0.171 | 4.01E-68 |
| 0.067 | 6.41E-68 |
| 0.075 | 1.26E-67 |
| 0.016 | 1.72E-67 |
| 0.109 | 4.63E-67 |
| 0.034 | 5.24E-67 |
| 0.017 | 1.89E-66 |
| 0.174 | 6.99E-66 |
| 0.021 | 1.54E-65 |
| 0.346 | 1.82E-65 |
| 0.123 | 6.10E-65 |
| 0.212 | 7.27E-65 |
| 0.085 | 8.89E-65 |
| 0.168 | 1.51E-64 |
| 0.049 | 1.79E-64 |
| 0.143 | 1.82E-64 |
| 0.068 | 1.93E-64 |

|       |          |
|-------|----------|
| 0.008 | 2.00E-64 |
| 0.173 | 5.98E-64 |
| 0.16  | 8.86E-64 |
| 0.008 | 1.27E-63 |
| 0.11  | 1.65E-63 |
| 0.012 | 1.86E-63 |
| 0.143 | 2.00E-63 |
| 0.022 | 2.62E-63 |
| 0.114 | 3.87E-63 |
| 0.22  | 1.02E-62 |
| 0.163 | 1.03E-62 |
| 0.122 | 1.06E-62 |
| 0.089 | 2.43E-62 |
| 0.236 | 3.20E-62 |
| 0.254 | 7.42E-62 |
| 0.208 | 1.23E-61 |
| 0.367 | 1.80E-61 |
| 0.028 | 4.21E-61 |
| 0.456 | 5.13E-61 |
| 0.044 | 1.86E-60 |
| 0.013 | 1.93E-60 |
| 0.151 | 2.27E-60 |
| 0.289 | 2.29E-60 |
| 0.595 | 5.41E-60 |
| 0.281 | 6.61E-60 |
| 0.17  | 8.34E-60 |
| 0.026 | 1.20E-59 |
| 0.064 | 2.23E-59 |
| 0.606 | 2.83E-59 |
| 0.348 | 3.42E-59 |
| 0.801 | 6.68E-59 |
| 0.022 | 8.02E-59 |
| 0.036 | 1.31E-58 |
| 0.154 | 1.55E-58 |
| 0.3   | 1.57E-58 |
| 0.408 | 1.73E-58 |
| 0.161 | 1.95E-58 |
| 0.013 | 3.34E-58 |
| 0.7   | 5.02E-58 |
| 0.032 | 1.03E-57 |
| 0.043 | 1.07E-57 |
| 0.038 | 1.84E-57 |
| 0.648 | 2.46E-57 |

|       |          |
|-------|----------|
| 0.195 | 2.71E-57 |
| 0.008 | 3.44E-57 |
| 0.159 | 3.53E-57 |
| 0.137 | 5.74E-57 |
| 0.184 | 1.33E-56 |
| 0.013 | 4.38E-56 |
| 0.516 | 4.45E-56 |
| 0.156 | 4.90E-56 |
| 0.007 | 1.95E-55 |
| 0.015 | 2.82E-55 |
| 0.28  | 3.86E-55 |
| 0.51  | 5.50E-55 |
| 0.02  | 1.05E-54 |
| 0.189 | 1.15E-54 |
| 0.614 | 1.64E-54 |
| 0.012 | 1.99E-54 |
| 0.019 | 3.30E-54 |
| 0.16  | 6.01E-54 |
| 0.529 | 1.06E-53 |
| 0.392 | 1.58E-53 |
| 0.111 | 1.70E-53 |
| 0.038 | 1.75E-53 |
| 0.017 | 2.26E-53 |
| 0.019 | 4.52E-53 |
| 0.247 | 2.61E-52 |
| 0.227 | 3.32E-52 |
| 0.151 | 3.47E-52 |
| 0.138 | 4.54E-52 |
| 0.157 | 5.83E-52 |
| 0.193 | 6.70E-52 |
| 0.106 | 8.54E-52 |
| 0.144 | 9.74E-52 |
| 0.137 | 6.03E-51 |
| 0.051 | 8.42E-51 |
| 0.184 | 1.02E-50 |
| 0.189 | 1.12E-50 |
| 0.183 | 1.18E-50 |
| 0.176 | 1.75E-50 |
| 0.041 | 1.86E-50 |
| 0.162 | 2.31E-50 |
| 0.588 | 2.46E-50 |
| 0.031 | 2.93E-50 |
| 0.296 | 4.20E-50 |



|       |          |
|-------|----------|
| 0.143 | 5.45E-50 |
| 0.221 | 9.29E-50 |
| 0.142 | 9.57E-50 |
| 0.202 | 2.14E-49 |
| 0.472 | 2.25E-49 |
| 0.432 | 2.83E-49 |
| 0.153 | 3.17E-49 |
| 0.012 | 4.01E-49 |
| 0.18  | 4.52E-49 |
| 0.16  | 1.82E-48 |
| 0.019 | 2.09E-48 |
| 0.227 | 3.69E-48 |
| 0.348 | 5.86E-48 |
| 0.516 | 1.24E-47 |
| 0.024 | 1.89E-47 |
| 0.061 | 1.97E-47 |
| 0.224 | 2.17E-47 |
| 0.175 | 2.56E-47 |
| 0.17  | 3.72E-47 |
| 0.04  | 4.65E-47 |
| 0.015 | 6.77E-47 |
| 0.011 | 2.62E-46 |
| 0.144 | 3.74E-46 |
| 0.039 | 5.93E-46 |
| 0.023 | 8.08E-46 |
| 0.142 | 8.12E-46 |
| 0.177 | 9.82E-46 |
| 0.048 | 1.15E-45 |
| 0.264 | 2.06E-45 |
| 0.159 | 3.27E-45 |
| 0.285 | 4.41E-45 |
| 0.213 | 5.13E-45 |
| 0.129 | 1.14E-44 |
| 0.234 | 1.58E-44 |
| 0.162 | 1.78E-44 |
| 0.044 | 3.38E-44 |
| 0.075 | 4.22E-44 |
| 0.225 | 4.60E-44 |
| 0.05  | 6.38E-44 |
| 0.171 | 7.60E-44 |
| 0.12  | 1.54E-43 |
| 0.013 | 2.03E-43 |
| 0.035 | 4.33E-43 |

|       |          |
|-------|----------|
| 0.012 | 5.52E-43 |
| 0.155 | 6.72E-43 |
| 0.027 | 6.90E-43 |
| 0.299 | 1.20E-42 |
| 0.03  | 1.50E-42 |
| 0.024 | 1.61E-42 |
| 0.226 | 1.79E-42 |
| 0.899 | 1.93E-42 |
| 0.092 | 2.02E-42 |
| 0.178 | 2.68E-42 |
| 0.096 | 5.49E-42 |
| 0.356 | 6.38E-42 |
| 0.097 | 6.74E-42 |
| 0.179 | 8.04E-42 |
| 0.125 | 1.20E-41 |
| 0.302 | 1.25E-41 |
| 0.343 | 1.44E-41 |
| 0.119 | 1.73E-41 |
| 0.125 | 1.84E-41 |
| 0.016 | 2.54E-41 |
| 0.012 | 2.81E-41 |
| 0.114 | 3.72E-41 |
| 0.543 | 3.96E-41 |
| 0.154 | 6.15E-41 |
| 0.191 | 6.49E-41 |
| 0.126 | 7.75E-41 |
| 0.215 | 8.08E-41 |
| 0.491 | 1.07E-40 |
| 0.165 | 1.16E-40 |
| 0.156 | 1.64E-40 |
| 0.155 | 1.83E-40 |
| 0.011 | 2.02E-40 |
| 0.122 | 2.44E-40 |
| 0.148 | 3.01E-40 |
| 0.055 | 8.36E-40 |
| 0.025 | 9.41E-40 |
| 0.337 | 1.20E-39 |
| 0.064 | 1.75E-39 |
| 0.012 | 2.07E-39 |
| 0.029 | 2.25E-39 |
| 0.247 | 4.18E-39 |
| 0.022 | 4.60E-39 |
| 0.041 | 5.16E-39 |

|       |          |
|-------|----------|
| 0.167 | 6.02E-39 |
| 0.112 | 9.13E-39 |
| 0.133 | 9.97E-39 |
| 0.274 | 1.26E-38 |
| 0.222 | 1.27E-38 |
| 0.01  | 2.28E-38 |
| 0.213 | 4.16E-38 |
| 0.02  | 5.70E-38 |
| 0.223 | 7.20E-38 |
| 0.237 | 7.39E-38 |
| 0.039 | 8.80E-38 |
| 0.12  | 1.01E-37 |
| 0.107 | 1.22E-37 |
| 0.112 | 1.38E-37 |
| 0.122 | 1.74E-37 |
| 0.151 | 3.13E-37 |
| 0.261 | 3.42E-37 |
| 0.035 | 8.39E-37 |
| 0.647 | 1.01E-36 |
| 0.052 | 1.37E-36 |
| 0.458 | 2.43E-36 |
| 0.021 | 2.84E-36 |
| 0.48  | 6.62E-36 |
| 0.227 | 8.07E-36 |
| 0.19  | 1.23E-35 |
| 0.093 | 1.34E-35 |
| 0.165 | 1.58E-35 |
| 0.1   | 1.69E-35 |
| 0.187 | 2.67E-35 |
| 0.127 | 2.84E-35 |
| 0.065 | 3.09E-35 |
| 0.105 | 4.88E-35 |
| 0.01  | 5.53E-35 |
| 0.221 | 5.64E-35 |
| 0.107 | 7.93E-35 |
| 0.036 | 8.28E-35 |
| 0.103 | 8.93E-35 |
| 0.022 | 1.87E-34 |
| 0.075 | 2.44E-34 |
| 0.438 | 2.98E-34 |
| 0.096 | 6.39E-34 |
| 0.233 | 8.48E-34 |
| 0.159 | 1.07E-33 |

|       |          |
|-------|----------|
| 0.395 | 1.67E-33 |
| 0.292 | 1.71E-33 |
| 0.022 | 1.98E-33 |
| 0.169 | 2.06E-33 |
| 0.189 | 4.27E-33 |
| 0.044 | 8.34E-33 |
| 0.033 | 9.89E-33 |
| 0.116 | 1.02E-32 |
| 0.106 | 1.08E-32 |
| 0.102 | 1.50E-32 |
| 0.039 | 1.69E-32 |
| 0.342 | 5.22E-32 |
| 0.095 | 6.93E-32 |
| 0.024 | 9.59E-32 |
| 0.46  | 1.03E-31 |
| 0.1   | 1.07E-31 |
| 0.625 | 1.14E-31 |
| 0.248 | 1.59E-31 |
| 0.013 | 1.76E-31 |
| 0.035 | 1.80E-31 |
| 0.3   | 1.86E-31 |
| 0.12  | 1.92E-31 |
| 0.094 | 2.09E-31 |
| 0.054 | 2.12E-31 |
| 0.365 | 2.96E-31 |
| 0.034 | 3.54E-31 |
| 0.097 | 3.89E-31 |
| 0.091 | 5.10E-31 |
| 0.112 | 5.60E-31 |
| 0.126 | 7.71E-31 |
| 0.032 | 1.00E-30 |
| 0.018 | 2.02E-30 |
| 0.053 | 2.25E-30 |
| 0.247 | 3.34E-30 |
| 0.067 | 4.53E-30 |
| 0.089 | 4.57E-30 |
| 0.987 | 4.94E-30 |
| 0.084 | 4.98E-30 |
| 0.031 | 5.38E-30 |
| 0.444 | 6.32E-30 |
| 0.161 | 7.27E-30 |
| 0.165 | 8.11E-30 |
| 0.357 | 8.93E-30 |

|       |          |
|-------|----------|
| 0.185 | 9.94E-30 |
| 0.039 | 1.08E-29 |
| 0.014 | 1.21E-29 |
| 0.117 | 2.02E-29 |
| 0.402 | 2.10E-29 |
| 0.045 | 2.42E-29 |
| 0.036 | 2.53E-29 |
| 0.191 | 3.43E-29 |
| 0.146 | 4.55E-29 |
| 0.206 | 5.40E-29 |
| 0.353 | 5.67E-29 |
| 0.087 | 5.69E-29 |
| 0.061 | 7.09E-29 |
| 0.047 | 1.08E-28 |
| 0.02  | 1.09E-28 |
| 0.1   | 1.13E-28 |
| 0.053 | 1.35E-28 |
| 0.083 | 1.37E-28 |
| 0.087 | 1.50E-28 |
| 0.025 | 1.61E-28 |
| 0.106 | 1.72E-28 |
| 0.012 | 2.11E-28 |
| 0.107 | 2.67E-28 |
| 0.419 | 4.20E-28 |
| 0.014 | 5.29E-28 |
| 0.096 | 5.84E-28 |
| 0.025 | 6.70E-28 |
| 0.411 | 7.08E-28 |
| 0.09  | 7.57E-28 |
| 0.143 | 8.85E-28 |
| 0.303 | 1.02E-27 |
| 0.133 | 1.03E-27 |
| 0.172 | 1.24E-27 |
| 0.111 | 1.55E-27 |
| 0.088 | 1.89E-27 |
| 0.019 | 2.04E-27 |
| 0.156 | 2.28E-27 |
| 0.047 | 2.31E-27 |
| 0.012 | 2.48E-27 |
| 0.038 | 2.52E-27 |
| 0.083 | 2.59E-27 |
| 0.673 | 3.13E-27 |
| 0.014 | 3.47E-27 |

|       |          |
|-------|----------|
| 0.055 | 3.76E-27 |
| 0.09  | 3.94E-27 |
| 0.12  | 4.34E-27 |
| 0.092 | 4.38E-27 |
| 0.015 | 7.00E-27 |
| 0.163 | 7.22E-27 |
| 0.101 | 9.43E-27 |
| 0.189 | 1.36E-26 |
| 0.064 | 1.41E-26 |
| 0.164 | 1.74E-26 |
| 0.022 | 1.85E-26 |
| 0.024 | 2.13E-26 |
| 0.022 | 2.42E-26 |
| 0.066 | 2.44E-26 |
| 0.103 | 2.93E-26 |
| 0.105 | 2.98E-26 |
| 0.022 | 3.23E-26 |
| 0.188 | 3.72E-26 |
| 0.093 | 4.04E-26 |
| 0.195 | 4.09E-26 |
| 0.287 | 4.27E-26 |
| 0.156 | 4.34E-26 |
| 0.174 | 4.85E-26 |
| 0.188 | 5.29E-26 |
| 0.064 | 9.89E-26 |
| 0.046 | 2.01E-25 |
| 0.076 | 2.32E-25 |
| 0.625 | 2.54E-25 |
| 0.863 | 2.80E-25 |
| 0.095 | 3.17E-25 |
| 0.039 | 3.28E-25 |
| 0.015 | 3.90E-25 |
| 0.038 | 5.85E-25 |
| 0.232 | 6.00E-25 |
| 0.127 | 6.09E-25 |
| 0.018 | 6.87E-25 |
| 0.364 | 7.17E-25 |
| 0.08  | 7.78E-25 |
| 0.193 | 8.12E-25 |
| 0.093 | 8.68E-25 |
| 0.079 | 9.80E-25 |
| 0.193 | 1.18E-24 |
| 0.079 | 1.23E-24 |

|       |          |
|-------|----------|
| 0.018 | 2.19E-24 |
| 0.086 | 2.25E-24 |
| 0.122 | 2.40E-24 |
| 0.098 | 2.54E-24 |
| 0.052 | 2.59E-24 |
| 0.138 | 2.76E-24 |
| 0.097 | 3.94E-24 |
| 0.194 | 4.11E-24 |
| 0.046 | 5.02E-24 |
| 0.015 | 8.10E-24 |
| 0.17  | 8.16E-24 |
| 0.17  | 8.21E-24 |
| 0.098 | 1.53E-23 |
| 0.074 | 1.61E-23 |
| 0.077 | 1.95E-23 |
| 0.21  | 1.99E-23 |
| 0.111 | 2.06E-23 |
| 0.114 | 2.26E-23 |
| 0.067 | 2.74E-23 |
| 0.039 | 2.76E-23 |
| 0.182 | 3.40E-23 |
| 0.032 | 3.68E-23 |
| 0.152 | 4.37E-23 |
| 0.327 | 5.27E-23 |
| 0.067 | 5.81E-23 |
| 0.079 | 6.96E-23 |
| 0.126 | 8.60E-23 |
| 0.095 | 8.83E-23 |
| 0.301 | 9.09E-23 |
| 0.113 | 1.06E-22 |
| 0.019 | 2.09E-22 |
| 0.181 | 2.71E-22 |
| 0.226 | 2.79E-22 |
| 0.068 | 3.11E-22 |
| 0.023 | 3.12E-22 |
| 0.024 | 3.52E-22 |
| 0.115 | 3.61E-22 |
| 0.077 | 3.62E-22 |
| 0.087 | 3.76E-22 |
| 0.031 | 4.45E-22 |
| 0.277 | 4.58E-22 |
| 0.053 | 4.77E-22 |
| 0.086 | 5.16E-22 |

|       |          |
|-------|----------|
| 0.073 | 5.60E-22 |
| 0.023 | 5.64E-22 |
| 0.067 | 5.65E-22 |
| 0.141 | 6.59E-22 |
| 0.207 | 6.87E-22 |
| 0.265 | 8.30E-22 |
| 0.019 | 8.82E-22 |
| 0.145 | 8.95E-22 |
| 0.051 | 1.19E-21 |
| 0.02  | 1.28E-21 |
| 0.084 | 1.46E-21 |
| 0.018 | 1.60E-21 |
| 0.39  | 1.68E-21 |
| 0.069 | 1.79E-21 |
| 0.086 | 1.82E-21 |
| 0.245 | 1.91E-21 |
| 0.034 | 2.82E-21 |
| 0.138 | 3.64E-21 |
| 0.019 | 3.77E-21 |
| 0.049 | 5.28E-21 |
| 0.077 | 5.43E-21 |
| 0.016 | 5.49E-21 |
| 0.112 | 6.49E-21 |
| 0.184 | 1.12E-20 |
| 0.338 | 1.14E-20 |
| 0.115 | 1.17E-20 |
| 0.077 | 1.22E-20 |
| 0.08  | 1.42E-20 |
| 0.134 | 1.48E-20 |
| 0.064 | 1.73E-20 |
| 0.397 | 1.82E-20 |
| 0.231 | 2.01E-20 |
| 0.109 | 2.11E-20 |
| 0.175 | 2.13E-20 |
| 0.072 | 2.56E-20 |
| 0.024 | 2.62E-20 |
| 0.142 | 3.18E-20 |
| 0.05  | 3.35E-20 |
| 0.103 | 3.63E-20 |
| 0.152 | 3.77E-20 |
| 0.059 | 4.45E-20 |
| 0.039 | 4.64E-20 |
| 0.109 | 4.97E-20 |



|       |          |
|-------|----------|
| 0.024 | 4.99E-20 |
| 0.126 | 7.24E-20 |
| 0.171 | 7.96E-20 |
| 0.052 | 1.00E-19 |
| 0.35  | 1.06E-19 |
| 0.064 | 1.18E-19 |
| 0.229 | 1.49E-19 |
| 0.094 | 1.55E-19 |
| 0.059 | 1.78E-19 |
| 0.088 | 1.98E-19 |
| 0.019 | 2.24E-19 |
| 0.087 | 2.25E-19 |
| 0.25  | 2.35E-19 |
| 0.364 | 2.37E-19 |
| 0.079 | 2.63E-19 |
| 0.059 | 2.86E-19 |
| 0.062 | 2.87E-19 |
| 0.058 | 3.38E-19 |
| 0.176 | 3.40E-19 |
| 0.048 | 3.49E-19 |
| 0.224 | 3.64E-19 |
| 0.111 | 3.71E-19 |
| 0.126 | 4.18E-19 |
| 0.075 | 6.35E-19 |
| 0.063 | 6.93E-19 |
| 0.035 | 7.01E-19 |
| 0.171 | 7.19E-19 |
| 0.024 | 7.51E-19 |
| 0.47  | 8.55E-19 |
| 0.044 | 8.67E-19 |
| 0.419 | 8.78E-19 |
| 0.126 | 9.88E-19 |
| 0.049 | 9.94E-19 |
| 0.02  | 1.22E-18 |
| 0.353 | 1.28E-18 |
| 0.062 | 1.32E-18 |
| 0.063 | 1.42E-18 |
| 0.1   | 1.79E-18 |
| 0.069 | 1.80E-18 |
| 0.035 | 2.17E-18 |
| 0.109 | 2.61E-18 |
| 0.067 | 2.85E-18 |
| 0.207 | 2.98E-18 |

|       |          |
|-------|----------|
| 0.258 | 3.28E-18 |
| 0.072 | 3.59E-18 |
| 0.025 | 3.75E-18 |
| 0.024 | 3.85E-18 |
| 0.054 | 3.93E-18 |
| 0.115 | 3.96E-18 |
| 0.117 | 4.21E-18 |
| 0.02  | 4.22E-18 |
| 0.116 | 4.54E-18 |
| 0.125 | 5.01E-18 |
| 0.301 | 5.17E-18 |
| 0.086 | 5.23E-18 |
| 0.301 | 6.03E-18 |
| 0.262 | 7.28E-18 |
| 0.224 | 7.38E-18 |
| 0.055 | 8.92E-18 |
| 0.062 | 1.00E-17 |
| 0.141 | 1.07E-17 |
| 0.08  | 1.39E-17 |
| 0.055 | 1.70E-17 |
| 0.056 | 2.02E-17 |
| 0.155 | 2.13E-17 |
| 0.058 | 2.29E-17 |
| 0.081 | 2.81E-17 |
| 0.172 | 3.11E-17 |
| 0.089 | 3.18E-17 |
| 0.101 | 3.30E-17 |
| 0.069 | 3.31E-17 |
| 0.343 | 3.33E-17 |
| 0.063 | 3.55E-17 |
| 0.189 | 3.67E-17 |
| 0.035 | 3.86E-17 |
| 0.176 | 4.20E-17 |
| 0.077 | 4.57E-17 |
| 0.104 | 4.59E-17 |
| 0.169 | 5.26E-17 |
| 0.083 | 5.45E-17 |
| 0.069 | 6.68E-17 |
| 0.062 | 7.01E-17 |
| 0.113 | 7.24E-17 |
| 0.141 | 7.86E-17 |
| 0.02  | 8.00E-17 |
| 0.059 | 8.15E-17 |

|       |          |
|-------|----------|
| 0.052 | 1.12E-16 |
| 0.097 | 1.28E-16 |
| 0.165 | 1.30E-16 |
| 0.02  | 1.75E-16 |
| 0.11  | 2.70E-16 |
| 0.028 | 2.71E-16 |
| 0.183 | 2.76E-16 |
| 0.293 | 2.79E-16 |
| 0.048 | 3.20E-16 |
| 0.087 | 3.72E-16 |
| 0.095 | 4.28E-16 |
| 0.032 | 4.58E-16 |
| 0.022 | 4.70E-16 |
| 0.085 | 5.19E-16 |
| 0.069 | 5.93E-16 |
| 0.165 | 6.12E-16 |
| 0.581 | 6.41E-16 |
| 0.186 | 6.53E-16 |
| 0.053 | 7.46E-16 |
| 0.061 | 7.67E-16 |
| 0.048 | 8.89E-16 |
| 0.025 | 9.03E-16 |
| 0.376 | 9.08E-16 |
| 0.113 | 9.55E-16 |
| 0.107 | 9.90E-16 |
| 0.245 | 1.19E-15 |
| 0.203 | 1.29E-15 |
| 0.051 | 1.29E-15 |
| 0.171 | 1.44E-15 |
| 0.104 | 1.48E-15 |
| 0.022 | 1.48E-15 |
| 0.055 | 1.48E-15 |
| 0.107 | 1.52E-15 |
| 0.104 | 1.72E-15 |
| 0.02  | 1.83E-15 |
| 0.254 | 2.13E-15 |
| 0.032 | 2.16E-15 |
| 0.116 | 2.19E-15 |
| 0.032 | 2.31E-15 |
| 0.036 | 2.55E-15 |
| 0.037 | 2.68E-15 |
| 0.126 | 2.77E-15 |
| 0.021 | 2.92E-15 |

|       |          |
|-------|----------|
| 0.102 | 3.12E-15 |
| 0.584 | 3.13E-15 |
| 0.179 | 3.29E-15 |
| 0.103 | 3.39E-15 |
| 0.15  | 3.54E-15 |
| 0.063 | 4.38E-15 |
| 0.059 | 4.47E-15 |
| 0.412 | 4.75E-15 |
| 0.045 | 5.41E-15 |
| 0.1   | 5.53E-15 |
| 0.036 | 5.89E-15 |
| 0.043 | 6.48E-15 |
| 0.264 | 7.09E-15 |
| 0.061 | 7.13E-15 |
| 0.035 | 7.36E-15 |
| 0.099 | 8.36E-15 |
| 0.201 | 8.92E-15 |
| 0.142 | 9.91E-15 |
| 0.04  | 1.03E-14 |
| 0.202 | 1.16E-14 |
| 0.151 | 1.18E-14 |
| 0.084 | 1.23E-14 |
| 0.205 | 1.25E-14 |
| 0.03  | 1.28E-14 |
| 0.096 | 1.35E-14 |
| 0.018 | 1.36E-14 |
| 0.073 | 1.55E-14 |
| 0.045 | 1.59E-14 |
| 0.431 | 1.61E-14 |
| 0.048 | 1.64E-14 |
| 0.053 | 2.22E-14 |
| 0.058 | 2.34E-14 |
| 0.042 | 2.89E-14 |
| 0.056 | 2.99E-14 |
| 0.22  | 3.04E-14 |
| 0.058 | 3.23E-14 |
| 0.101 | 3.34E-14 |
| 0.019 | 3.36E-14 |
| 0.324 | 3.54E-14 |
| 0.101 | 3.68E-14 |
| 0.106 | 3.76E-14 |
| 0.164 | 3.94E-14 |
| 0.176 | 4.39E-14 |

|       |          |
|-------|----------|
| 0.143 | 4.40E-14 |
| 0.127 | 4.69E-14 |
| 0.155 | 5.07E-14 |
| 0.085 | 5.53E-14 |
| 0.116 | 6.09E-14 |
| 0.198 | 6.13E-14 |
| 0.14  | 7.09E-14 |
| 0.298 | 7.73E-14 |
| 0.027 | 8.96E-14 |
| 0.213 | 9.61E-14 |
| 0.119 | 1.16E-13 |
| 0.077 | 1.17E-13 |
| 0.072 | 1.18E-13 |
| 0.06  | 1.18E-13 |
| 0.22  | 1.32E-13 |
| 0.063 | 1.37E-13 |
| 0.255 | 1.50E-13 |
| 0.036 | 1.56E-13 |
| 0.25  | 1.69E-13 |
| 0.051 | 1.84E-13 |
| 0.096 | 2.18E-13 |
| 0.056 | 2.19E-13 |
| 0.093 | 2.19E-13 |
| 0.465 | 2.23E-13 |
| 0.198 | 2.23E-13 |
| 0.019 | 2.40E-13 |
| 0.028 | 2.48E-13 |
| 0.083 | 2.62E-13 |
| 0.233 | 2.72E-13 |
| 0.112 | 2.73E-13 |
| 0.247 | 2.73E-13 |
| 0.039 | 2.80E-13 |
| 0.027 | 2.89E-13 |
| 0.019 | 2.93E-13 |
| 0.045 | 3.07E-13 |
| 0.056 | 3.15E-13 |
| 0.079 | 3.82E-13 |
| 0.182 | 3.87E-13 |
| 0.165 | 4.17E-13 |
| 0.113 | 4.45E-13 |
| 0.78  | 4.63E-13 |
| 0.384 | 4.63E-13 |
| 0.046 | 5.59E-13 |

|       |          |
|-------|----------|
| 0.084 | 5.95E-13 |
| 0.157 | 6.45E-13 |
| 0.342 | 6.54E-13 |
| 0.028 | 6.66E-13 |
| 0.654 | 7.76E-13 |
| 0.046 | 8.01E-13 |
| 0.052 | 9.17E-13 |
| 0.061 | 9.46E-13 |
| 0.05  | 1.03E-12 |
| 0.111 | 1.11E-12 |
| 0.036 | 1.14E-12 |
| 0.079 | 1.17E-12 |
| 0.083 | 1.19E-12 |
| 0.131 | 1.23E-12 |
| 0.213 | 1.28E-12 |
| 0.079 | 1.28E-12 |
| 0.029 | 1.47E-12 |
| 0.103 | 1.97E-12 |
| 0.081 | 2.02E-12 |
| 0.02  | 2.09E-12 |
| 0.055 | 2.11E-12 |
| 0.028 | 2.18E-12 |
| 0.274 | 2.25E-12 |
| 0.022 | 2.49E-12 |
| 0.053 | 2.67E-12 |
| 0.143 | 2.88E-12 |
| 0.028 | 3.02E-12 |
| 0.036 | 3.40E-12 |
| 0.129 | 3.53E-12 |
| 0.08  | 3.66E-12 |
| 0.027 | 3.99E-12 |
| 0.019 | 4.07E-12 |
| 0.089 | 4.40E-12 |
| 0.114 | 4.66E-12 |
| 0.031 | 5.03E-12 |
| 0.587 | 5.48E-12 |
| 0.043 | 6.19E-12 |
| 0.075 | 6.19E-12 |
| 0.03  | 6.25E-12 |
| 0.024 | 6.52E-12 |
| 0.049 | 6.73E-12 |
| 0.03  | 7.32E-12 |
| 0.157 | 7.37E-12 |

|       |          |
|-------|----------|
| 0.044 | 7.39E-12 |
| 0.188 | 7.80E-12 |
| 0.039 | 7.99E-12 |
| 0.106 | 8.18E-12 |
| 0.059 | 8.38E-12 |
| 0.058 | 8.59E-12 |
| 0.164 | 9.07E-12 |
| 0.122 | 9.65E-12 |
| 0.153 | 1.01E-11 |
| 0.055 | 1.04E-11 |
| 0.174 | 1.08E-11 |
| 0.054 | 1.15E-11 |
| 0.052 | 1.15E-11 |
| 0.06  | 1.17E-11 |
| 0.07  | 1.33E-11 |
| 0.122 | 1.44E-11 |
| 0.388 | 1.47E-11 |
| 0.025 | 1.58E-11 |
| 0.111 | 1.62E-11 |
| 0.113 | 1.66E-11 |
| 0.028 | 1.67E-11 |
| 0.148 | 1.90E-11 |
| 0.279 | 1.94E-11 |
| 0.06  | 2.13E-11 |
| 0.052 | 2.14E-11 |
| 0.09  | 2.27E-11 |
| 0.299 | 2.45E-11 |
| 0.123 | 2.60E-11 |
| 0.04  | 2.97E-11 |
| 0.034 | 3.13E-11 |
| 0.116 | 3.20E-11 |
| 0.582 | 3.33E-11 |
| 0.361 | 3.45E-11 |
| 0.091 | 3.82E-11 |
| 0.048 | 3.83E-11 |
| 0.16  | 4.03E-11 |
| 0.157 | 4.46E-11 |
| 0.027 | 5.86E-11 |
| 0.328 | 5.95E-11 |
| 0.273 | 5.96E-11 |
| 0.04  | 6.46E-11 |
| 0.061 | 6.72E-11 |
| 0.069 | 6.75E-11 |

|       |          |
|-------|----------|
| 0.083 | 6.81E-11 |
| 0.135 | 9.83E-11 |
| 0.024 | 1.01E-10 |
| 0.065 | 1.14E-10 |
| 0.081 | 1.17E-10 |
| 0.028 | 1.29E-10 |
| 0.253 | 1.30E-10 |
| 0.031 | 1.36E-10 |
| 0.104 | 1.60E-10 |
| 0.155 | 1.81E-10 |
| 0.045 | 1.88E-10 |
| 0.19  | 2.07E-10 |
| 0.261 | 2.12E-10 |
| 0.16  | 2.14E-10 |
| 0.109 | 2.17E-10 |
| 0.031 | 2.25E-10 |
| 0.028 | 2.26E-10 |
| 0.051 | 2.43E-10 |
| 0.06  | 2.63E-10 |
| 0.251 | 3.16E-10 |
| 0.038 | 3.77E-10 |
| 0.187 | 3.89E-10 |
| 0.066 | 4.50E-10 |
| 0.122 | 4.50E-10 |
| 0.117 | 4.61E-10 |
| 0.105 | 4.62E-10 |
| 0.061 | 5.35E-10 |
| 0.145 | 5.74E-10 |
| 0.065 | 6.06E-10 |
| 0.08  | 6.59E-10 |
| 0.088 | 6.67E-10 |
| 0.161 | 6.71E-10 |
| 0.409 | 6.99E-10 |
| 0.023 | 7.27E-10 |
| 0.121 | 7.45E-10 |
| 0.193 | 7.71E-10 |
| 0.098 | 7.97E-10 |
| 0.341 | 8.41E-10 |
| 0.088 | 8.53E-10 |
| 0.201 | 8.77E-10 |
| 0.197 | 9.17E-10 |
| 0.083 | 9.91E-10 |
| 0.061 | 1.17E-09 |



|       |          |
|-------|----------|
| 0.041 | 1.40E-09 |
| 0.049 | 1.57E-09 |
| 0.067 | 1.60E-09 |
| 0.441 | 1.72E-09 |
| 0.037 | 1.75E-09 |
| 0.122 | 1.79E-09 |
| 0.061 | 1.80E-09 |
| 0.099 | 1.81E-09 |
| 0.028 | 1.86E-09 |
| 0.092 | 1.87E-09 |
| 0.213 | 1.90E-09 |
| 0.141 | 1.93E-09 |
| 0.052 | 2.19E-09 |
| 0.037 | 2.29E-09 |
| 0.057 | 2.37E-09 |
| 0.053 | 2.56E-09 |
| 0.027 | 2.56E-09 |
| 0.068 | 2.63E-09 |
| 0.132 | 2.74E-09 |
| 0.081 | 2.95E-09 |
| 0.266 | 2.96E-09 |
| 0.059 | 3.04E-09 |
| 0.051 | 3.17E-09 |
| 0.074 | 3.29E-09 |
| 0.072 | 3.61E-09 |
| 0.195 | 4.02E-09 |
| 0.107 | 4.06E-09 |
| 0.028 | 4.32E-09 |
| 0.151 | 4.45E-09 |
| 0.055 | 4.73E-09 |
| 0.091 | 4.92E-09 |
| 0.221 | 4.95E-09 |
| 0.032 | 5.39E-09 |
| 0.09  | 5.47E-09 |
| 0.645 | 5.87E-09 |
| 0.12  | 6.17E-09 |
| 0.039 | 6.37E-09 |
| 0.264 | 6.67E-09 |
| 0.182 | 7.51E-09 |
| 0.221 | 7.86E-09 |
| 0.071 | 8.38E-09 |
| 0.188 | 8.39E-09 |
| 0.335 | 8.51E-09 |

|       |          |
|-------|----------|
| 0.051 | 8.99E-09 |
| 0.143 | 9.15E-09 |
| 0.112 | 9.18E-09 |
| 0.109 | 9.51E-09 |
| 0.124 | 9.54E-09 |
| 0.225 | 9.59E-09 |
| 0.078 | 9.90E-09 |
| 0.035 | 1.02E-08 |
| 0.027 | 1.02E-08 |
| 0.035 | 1.15E-08 |
| 0.088 | 1.27E-08 |
| 0.075 | 1.28E-08 |
| 0.043 | 1.34E-08 |
| 0.034 | 1.44E-08 |
| 0.19  | 1.58E-08 |
| 0.086 | 1.63E-08 |
| 0.082 | 1.64E-08 |
| 0.196 | 1.65E-08 |
| 0.357 | 1.69E-08 |
| 0.293 | 1.71E-08 |
| 0.071 | 1.79E-08 |
| 0.529 | 1.88E-08 |
| 0.053 | 1.96E-08 |
| 0.068 | 2.06E-08 |
| 0.056 | 2.13E-08 |
| 0.052 | 2.14E-08 |
| 0.037 | 2.16E-08 |
| 0.082 | 2.18E-08 |
| 0.058 | 2.29E-08 |
| 0.075 | 2.30E-08 |
| 0.061 | 2.32E-08 |
| 0.42  | 2.41E-08 |
| 0.03  | 2.50E-08 |
| 0.102 | 2.69E-08 |
| 0.307 | 2.73E-08 |
| 0.052 | 2.76E-08 |
| 0.108 | 2.83E-08 |
| 0.083 | 3.06E-08 |
| 0.089 | 3.09E-08 |
| 0.094 | 3.24E-08 |
| 0.062 | 3.48E-08 |
| 0.065 | 3.61E-08 |
| 0.036 | 3.87E-08 |

|       |          |
|-------|----------|
| 0.072 | 3.95E-08 |
| 0.069 | 4.06E-08 |
| 0.17  | 4.10E-08 |
| 0.076 | 4.58E-08 |
| 0.414 | 4.63E-08 |
| 0.052 | 4.81E-08 |
| 0.11  | 4.93E-08 |
| 0.04  | 4.95E-08 |
| 0.038 | 5.00E-08 |
| 0.056 | 5.51E-08 |
| 0.155 | 5.51E-08 |
| 0.051 | 5.60E-08 |
| 0.304 | 6.18E-08 |
| 0.443 | 6.34E-08 |
| 0.367 | 6.53E-08 |
| 0.089 | 6.57E-08 |
| 0.061 | 6.82E-08 |
| 0.228 | 7.37E-08 |
| 0.069 | 7.43E-08 |
| 0.196 | 7.89E-08 |
| 0.157 | 8.22E-08 |
| 0.161 | 8.65E-08 |
| 0.07  | 9.15E-08 |
| 0.092 | 9.23E-08 |
| 0.155 | 9.66E-08 |
| 0.027 | 9.92E-08 |
| 0.191 | 1.05E-07 |
| 0.022 | 1.11E-07 |
| 0.047 | 1.12E-07 |
| 0.165 | 1.12E-07 |
| 0.093 | 1.16E-07 |
| 0.024 | 1.16E-07 |
| 0.079 | 1.18E-07 |
| 0.025 | 1.24E-07 |
| 0.183 | 1.33E-07 |
| 0.085 | 1.43E-07 |
| 0.11  | 1.44E-07 |
| 0.068 | 1.45E-07 |
| 0.048 | 1.48E-07 |
| 0.065 | 1.57E-07 |
| 0.058 | 1.61E-07 |
| 0.03  | 1.62E-07 |
| 0.119 | 1.63E-07 |

|       |          |
|-------|----------|
| 0.365 | 1.68E-07 |
| 0.331 | 1.74E-07 |
| 0.106 | 1.74E-07 |
| 0.038 | 1.76E-07 |
| 0.184 | 1.81E-07 |
| 0.031 | 1.82E-07 |
| 0.125 | 1.85E-07 |
| 0.09  | 2.02E-07 |
| 0.024 | 2.15E-07 |
| 0.056 | 2.17E-07 |
| 0.347 | 2.22E-07 |
| 0.101 | 2.26E-07 |
| 0.035 | 2.36E-07 |
| 0.112 | 2.52E-07 |
| 0.039 | 2.64E-07 |
| 0.069 | 2.65E-07 |
| 0.05  | 2.73E-07 |
| 0.11  | 2.76E-07 |
| 0.049 | 2.77E-07 |
| 0.025 | 2.99E-07 |
| 0.055 | 3.22E-07 |
| 0.42  | 3.26E-07 |
| 0.035 | 3.45E-07 |
| 0.088 | 3.54E-07 |
| 0.248 | 3.59E-07 |
| 0.234 | 3.68E-07 |
| 0.079 | 4.17E-07 |
| 0.124 | 4.18E-07 |
| 0.077 | 4.36E-07 |
| 0.053 | 4.40E-07 |
| 0.113 | 4.75E-07 |
| 0.065 | 4.79E-07 |
| 0.22  | 4.88E-07 |
| 0.033 | 4.89E-07 |
| 0.208 | 4.94E-07 |
| 0.104 | 5.19E-07 |
| 0.236 | 5.73E-07 |
| 0.2   | 6.10E-07 |
| 0.027 | 6.21E-07 |
| 0.133 | 6.34E-07 |
| 0.034 | 6.40E-07 |
| 0.026 | 6.57E-07 |
| 0.12  | 6.97E-07 |

|       |          |
|-------|----------|
| 0.169 | 7.59E-07 |
| 0.052 | 7.79E-07 |
| 0.197 | 7.84E-07 |
| 0.285 | 7.98E-07 |
| 0.161 | 8.05E-07 |
| 0.033 | 8.52E-07 |
| 0.111 | 8.92E-07 |
| 0.701 | 9.11E-07 |
| 0.292 | 9.44E-07 |
| 0.033 | 9.61E-07 |
| 0.04  | 1.01E-06 |
| 0.026 | 1.01E-06 |
| 0.158 | 1.02E-06 |
| 0.059 | 1.04E-06 |
| 0.199 | 1.05E-06 |
| 0.04  | 1.07E-06 |
| 0.969 | 1.11E-06 |
| 0.139 | 1.20E-06 |
| 0.072 | 1.25E-06 |
| 0.101 | 1.29E-06 |
| 0.028 | 1.38E-06 |
| 0.113 | 1.50E-06 |
| 0.035 | 1.51E-06 |
| 0.086 | 1.55E-06 |
| 0.097 | 1.59E-06 |
| 0.03  | 1.60E-06 |
| 0.029 | 1.63E-06 |
| 0.114 | 1.65E-06 |
| 0.063 | 1.76E-06 |
| 0.255 | 1.80E-06 |
| 0.107 | 1.91E-06 |
| 0.059 | 1.96E-06 |
| 0.04  | 2.01E-06 |
| 0.07  | 2.20E-06 |
| 0.093 | 2.51E-06 |
| 0.032 | 2.86E-06 |
| 0.044 | 2.87E-06 |
| 0.123 | 2.93E-06 |
| 0.072 | 2.94E-06 |
| 0.046 | 2.96E-06 |
| 0.036 | 3.00E-06 |
| 0.033 | 3.09E-06 |
| 0.141 | 3.33E-06 |

|       |          |
|-------|----------|
| 0.085 | 3.75E-06 |
| 0.053 | 3.80E-06 |
| 0.167 | 3.88E-06 |
| 0.114 | 4.21E-06 |
| 0.119 | 4.27E-06 |
| 0.101 | 4.28E-06 |
| 0.088 | 4.42E-06 |
| 0.061 | 4.50E-06 |
| 0.026 | 4.65E-06 |
| 0.032 | 4.69E-06 |
| 0.12  | 5.10E-06 |
| 0.153 | 5.37E-06 |
| 0.031 | 5.46E-06 |
| 0.487 | 5.72E-06 |
| 0.041 | 5.76E-06 |
| 0.146 | 5.77E-06 |
| 0.04  | 5.83E-06 |
| 0.025 | 5.91E-06 |
| 0.072 | 5.91E-06 |
| 0.196 | 6.42E-06 |
| 0.124 | 6.59E-06 |
| 0.027 | 6.89E-06 |
| 0.075 | 7.43E-06 |
| 0.057 | 7.79E-06 |
| 0.13  | 7.89E-06 |
| 0.156 | 7.93E-06 |
| 0.049 | 8.19E-06 |
| 0.056 | 8.55E-06 |
| 0.057 | 8.61E-06 |
| 0.058 | 8.63E-06 |
| 0.042 | 8.80E-06 |
| 0.103 | 8.89E-06 |
| 0.065 | 8.95E-06 |
| 0.074 | 9.26E-06 |
| 0.064 | 9.55E-06 |
| 0.125 | 1.21E-05 |
| 0.087 | 1.24E-05 |
| 0.129 | 1.25E-05 |
| 0.119 | 1.27E-05 |
| 0.051 | 1.28E-05 |
| 0.052 | 1.30E-05 |
| 0.097 | 1.31E-05 |
| 0.527 | 1.32E-05 |

|       |          |
|-------|----------|
| 0.191 | 1.39E-05 |
| 0.222 | 1.42E-05 |
| 0.249 | 1.51E-05 |
| 0.229 | 1.55E-05 |
| 0.103 | 1.60E-05 |
| 0.102 | 1.69E-05 |
| 0.258 | 1.72E-05 |
| 0.295 | 1.74E-05 |
| 0.533 | 1.81E-05 |
| 0.164 | 1.82E-05 |
| 0.204 | 1.85E-05 |
| 0.033 | 1.88E-05 |
| 0.078 | 1.90E-05 |
| 0.14  | 1.97E-05 |
| 0.301 | 1.98E-05 |
| 0.089 | 2.08E-05 |
| 0.061 | 2.15E-05 |
| 0.099 | 2.18E-05 |
| 0.153 | 2.20E-05 |
| 0.178 | 2.21E-05 |
| 0.09  | 2.49E-05 |
| 0.038 | 2.59E-05 |
| 0.125 | 2.66E-05 |
| 0.025 | 2.92E-05 |
| 0.202 | 2.99E-05 |
| 0.378 | 3.00E-05 |
| 0.138 | 3.03E-05 |
| 0.032 | 3.11E-05 |
| 0.101 | 3.22E-05 |
| 0.065 | 3.37E-05 |
| 0.071 | 3.42E-05 |
| 0.094 | 3.50E-05 |
| 0.141 | 3.63E-05 |
| 0.194 | 3.69E-05 |
| 0.167 | 3.79E-05 |
| 0.056 | 3.84E-05 |
| 0.037 | 3.92E-05 |
| 0.062 | 4.02E-05 |
| 0.076 | 4.10E-05 |
| 0.129 | 4.16E-05 |
| 0.126 | 4.41E-05 |
| 0.321 | 4.41E-05 |
| 0.226 | 4.48E-05 |

|       |             |
|-------|-------------|
| 0.155 | 4.66E-05    |
| 0.045 | 4.67E-05    |
| 0.066 | 4.68E-05    |
| 0.204 | 4.71E-05    |
| 0.203 | 4.82E-05    |
| 0.157 | 4.95E-05    |
| 0.03  | 5.25E-05    |
| 0.156 | 5.37E-05    |
| 0.104 | 5.53E-05    |
| 0.066 | 5.62E-05    |
| 0.294 | 5.70E-05    |
| 0.075 | 5.74E-05    |
| 0.027 | 5.74E-05    |
| 0.155 | 5.83E-05    |
| 0.173 | 6.04E-05    |
| 0.064 | 6.32E-05    |
| 0.032 | 6.42E-05    |
| 0.042 | 6.78E-05    |
| 0.107 | 6.92E-05    |
| 0.077 | 7.28E-05    |
| 0.063 | 7.36E-05    |
| 0.049 | 7.62E-05    |
| 0.156 | 7.66E-05    |
| 0.059 | 7.86E-05    |
| 0.115 | 7.94E-05    |
| 0.052 | 8.05E-05    |
| 0.132 | 8.09E-05    |
| 0.12  | 8.55E-05    |
| 0.06  | 8.59E-05    |
| 0.052 | 8.77E-05    |
| 0.053 | 8.84E-05    |
| 0.035 | 9.62E-05    |
| 0.492 | 0.000100431 |
| 0.157 | 0.000104013 |
| 0.126 | 0.000106265 |
| 0.11  | 0.000106347 |
| 0.292 | 0.000106723 |
| 0.068 | 0.000107934 |
| 0.063 | 0.000109293 |
| 0.045 | 0.000111048 |
| 0.079 | 0.000113227 |
| 0.09  | 0.000115553 |
| 0.075 | 0.000115688 |



|       |             |
|-------|-------------|
| 0.168 | 0.000115789 |
| 0.185 | 0.000117943 |
| 0.09  | 0.00012173  |
| 0.304 | 0.000123115 |
| 0.305 | 0.000125466 |
| 0.04  | 0.000131469 |
| 0.169 | 0.0001317   |
| 0.054 | 0.000137092 |
| 0.146 | 0.00013915  |
| 0.031 | 0.000143518 |
| 0.265 | 0.000145152 |
| 0.029 | 0.00014569  |
| 0.211 | 0.000150414 |
| 0.222 | 0.000154773 |
| 0.036 | 0.000165689 |
| 0.104 | 0.000170815 |
| 0.031 | 0.000181234 |
| 0.128 | 0.000210404 |
| 0.168 | 0.000216813 |
| 0.077 | 0.000227287 |
| 0.269 | 0.000235986 |
| 0.264 | 0.000236946 |
| 0.169 | 0.000242362 |
| 0.071 | 0.000244552 |
| 0.073 | 0.000251406 |
| 0.141 | 0.000270339 |
| 0.063 | 0.000288823 |
| 0.191 | 0.000289299 |
| 0.097 | 0.000292783 |
| 0.096 | 0.000304139 |
| 0.117 | 0.000304243 |
| 0.195 | 0.000315507 |
| 0.079 | 0.000324638 |
| 0.122 | 0.000337024 |
| 0.192 | 0.000340022 |
| 0.045 | 0.000351632 |
| 0.048 | 0.000365617 |
| 0.032 | 0.00040767  |
| 0.034 | 0.000414546 |
| 0.326 | 0.000417535 |
| 0.086 | 0.000417876 |
| 0.736 | 0.000418766 |
| 0.066 | 0.000431596 |

|       |             |
|-------|-------------|
| 0.359 | 0.000432316 |
| 0.152 | 0.000435667 |
| 0.044 | 0.000464157 |
| 0.101 | 0.000471147 |
| 0.068 | 0.000487764 |
| 0.167 | 0.000510137 |
| 0.34  | 0.000518598 |
| 0.033 | 0.000525585 |
| 0.225 | 0.000548378 |
| 0.093 | 0.000554861 |
| 0.048 | 0.000586958 |
| 0.155 | 0.000590876 |
| 0.033 | 0.000596955 |
| 0.051 | 0.000598196 |
| 0.131 | 0.000615759 |
| 0.044 | 0.000626344 |
| 0.265 | 0.000628248 |
| 0.063 | 0.000629237 |
| 0.183 | 0.00063167  |
| 0.03  | 0.000643232 |
| 0.508 | 0.000649538 |
| 0.038 | 0.000659013 |
| 0.028 | 0.000667766 |
| 0.047 | 0.00068092  |
| 0.198 | 0.000685558 |
| 0.111 | 0.000710823 |
| 0.027 | 0.000713058 |
| 0.086 | 0.000766121 |
| 0.032 | 0.000790355 |
| 0.231 | 0.000792459 |
| 0.229 | 0.000812539 |
| 0.147 | 0.000828544 |
| 0.2   | 0.000832903 |
| 0.064 | 0.000834191 |
| 0.048 | 0.000843459 |
| 0.311 | 0.000863669 |
| 0.067 | 0.000882728 |
| 0.077 | 0.000896851 |
| 0.067 | 0.000902977 |
| 0.082 | 0.000904781 |
| 0.029 | 0.000906698 |
| 0.041 | 0.000940166 |
| 0.08  | 0.000953002 |

|       |             |
|-------|-------------|
| 0.308 | 0.001024622 |
| 0.232 | 0.001054284 |
| 0.04  | 0.00106631  |
| 0.147 | 0.001070158 |
| 0.098 | 0.001089029 |
| 0.405 | 0.001102338 |
| 0.125 | 0.001105349 |
| 0.045 | 0.001120365 |
| 0.137 | 0.001254003 |
| 0.054 | 0.001255164 |
| 0.032 | 0.001261574 |
| 0.081 | 0.001277048 |
| 0.073 | 0.001294147 |
| 0.183 | 0.001299673 |
| 0.07  | 0.00130783  |
| 0.077 | 0.001312058 |
| 0.052 | 0.001315621 |
| 0.066 | 0.001331684 |
| 0.031 | 0.001351043 |
| 0.119 | 0.001351999 |
| 0.159 | 0.001389042 |
| 0.579 | 0.001408333 |
| 0.125 | 0.001413287 |
| 0.032 | 0.001418334 |
| 0.044 | 0.001446428 |
| 0.076 | 0.001523397 |
| 0.088 | 0.001549552 |
| 0.064 | 0.001586827 |
| 0.034 | 0.001590738 |
| 0.033 | 0.001592763 |
| 0.062 | 0.001622889 |
| 0.071 | 0.001623302 |
| 0.073 | 0.001645364 |
| 0.048 | 0.001663799 |
| 0.157 | 0.001701114 |
| 0.311 | 0.001746509 |
| 0.342 | 0.001789042 |
| 0.056 | 0.001802695 |
| 0.175 | 0.001832827 |
| 0.093 | 0.001872053 |
| 0.068 | 0.001873633 |
| 0.057 | 0.001881855 |
| 0.027 | 0.001894474 |

|       |             |
|-------|-------------|
| 0.091 | 0.001917251 |
| 0.13  | 0.001935899 |
| 0.484 | 0.001977944 |
| 0.036 | 0.002075591 |
| 0.228 | 0.002206604 |
| 0.2   | 0.002275262 |
| 0.069 | 0.002455708 |
| 0.057 | 0.002522228 |
| 0.368 | 0.002573405 |
| 0.166 | 0.002597044 |
| 0.179 | 0.002696791 |
| 0.061 | 0.00271298  |
| 0.053 | 0.002778135 |
| 0.062 | 0.002834121 |
| 0.049 | 0.002846765 |
| 0.036 | 0.002929154 |
| 0.063 | 0.002959286 |
| 0.132 | 0.003004044 |
| 0.06  | 0.003017731 |
| 0.074 | 0.003035592 |
| 0.101 | 0.003067745 |
| 0.635 | 0.003177289 |
| 0.108 | 0.003326377 |
| 0.092 | 0.00343239  |
| 0.073 | 0.003569371 |
| 0.043 | 0.003592761 |
| 0.047 | 0.003673782 |
| 0.067 | 0.003795515 |
| 0.133 | 0.003817167 |
| 0.111 | 0.003935785 |
| 0.147 | 0.003950847 |
| 0.066 | 0.003971653 |
| 0.1   | 0.003992026 |
| 0.058 | 0.004259398 |
| 0.089 | 0.004347205 |
| 0.027 | 0.004412589 |
| 0.098 | 0.004539397 |
| 0.205 | 0.004699131 |
| 0.146 | 0.004837795 |
| 0.212 | 0.004841984 |
| 0.035 | 0.004901557 |
| 0.205 | 0.005006111 |
| 0.051 | 0.005013748 |

|       |             |
|-------|-------------|
| 0.429 | 0.005098774 |
| 0.068 | 0.005327989 |
| 0.059 | 0.005383729 |
| 0.057 | 0.005490953 |
| 0.072 | 0.005493851 |
| 0.103 | 0.005519399 |
| 0.051 | 0.005671808 |
| 0.205 | 0.006053179 |
| 0.12  | 0.00614095  |
| 0.066 | 0.006141908 |
| 0.099 | 0.006189354 |
| 0.287 | 0.006421977 |
| 0.056 | 0.006430843 |
| 0.346 | 0.006898352 |
| 0.068 | 0.006959706 |
| 0.216 | 0.007057035 |
| 0.074 | 0.007260943 |
| 0.367 | 0.007477946 |
| 0.17  | 0.00780383  |
| 0.087 | 0.007862819 |
| 0.028 | 0.00797275  |
| 0.149 | 0.008154748 |
| 0.049 | 0.00817715  |
| 0.048 | 0.008183833 |
| 0.116 | 0.00824488  |
| 0.052 | 0.008336629 |
| 0.164 | 0.008494859 |
| 0.11  | 0.008497173 |
| 0.164 | 0.008618132 |
| 0.124 | 0.008824073 |
| 0.26  | 0.008898248 |
| 0.038 | 0.008940047 |
| 0.044 | 0.009154035 |
| 0.155 | 0.009216473 |
| 0.055 | 0.009463387 |
| 0.145 | 0.009633478 |
| 0.032 | 0.009683149 |
| 0.105 | 0.009748376 |
| 0.289 | 0.00982646  |
| 0.123 | 0.010113874 |
| 0.3   | 0.01028586  |
| 0.077 | 0.010399808 |
| 0.967 | 0.010561294 |

|       |             |
|-------|-------------|
| 0.175 | 0.010608298 |
| 0.058 | 0.010988022 |
| 0.057 | 0.011349198 |
| 0.062 | 0.011685319 |
| 0.056 | 0.011700837 |
| 0.262 | 0.011800837 |
| 0.079 | 0.011837386 |
| 0.099 | 0.011871468 |
| 0.05  | 0.011950078 |
| 0.325 | 0.012037231 |
| 0.096 | 0.012048724 |
| 0.22  | 0.01205009  |
| 0.084 | 0.012084977 |
| 0.037 | 0.012156852 |
| 0.076 | 0.012288    |
| 0.031 | 0.012426975 |
| 0.077 | 0.012900429 |
| 0.046 | 0.013619689 |
| 0.052 | 0.01396704  |
| 0.03  | 0.014096582 |
| 0.051 | 0.014299326 |
| 0.051 | 0.015353412 |
| 0.162 | 0.015637117 |
| 0.249 | 0.015730777 |
| 0.246 | 0.016017346 |
| 0.052 | 0.016236362 |
| 0.035 | 0.016321312 |
| 0.057 | 0.016712093 |
| 0.212 | 0.016768247 |
| 0.105 | 0.016884232 |
| 0.101 | 0.018835605 |
| 0.069 | 0.019385196 |
| 0.112 | 0.019389329 |
| 0.117 | 0.019643634 |
| 0.179 | 0.019663132 |
| 0.065 | 0.020298873 |
| 0.036 | 0.020669748 |
| 0.058 | 0.020907162 |
| 0.033 | 0.021260191 |
| 0.038 | 0.021769527 |
| 0.087 | 0.022503184 |
| 0.131 | 0.022807386 |
| 0.068 | 0.023766386 |

|       |             |
|-------|-------------|
| 0.169 | 0.024063188 |
| 0.123 | 0.024248771 |
| 0.067 | 0.02560409  |
| 0.037 | 0.025905143 |
| 0.19  | 0.025956027 |
| 0.132 | 0.026477224 |
| 0.044 | 0.026599265 |
| 0.029 | 0.026676741 |
| 0.034 | 0.027069679 |
| 0.194 | 0.027512968 |
| 0.09  | 0.027600195 |
| 0.06  | 0.028132295 |
| 0.035 | 0.028571033 |
| 0.363 | 0.0291773   |
| 0.043 | 0.029322333 |
| 0.119 | 0.029419308 |
| 0.084 | 0.029740309 |
| 0.218 | 0.031085273 |
| 0.204 | 0.031179922 |
| 0.057 | 0.031978855 |
| 0.125 | 0.032742771 |
| 0.056 | 0.032775357 |
| 0.065 | 0.033214657 |
| 0.081 | 0.033371135 |
| 0.41  | 0.033567616 |
| 0.083 | 0.034223794 |
| 0.041 | 0.03447069  |
| 0.256 | 0.034711052 |
| 0.175 | 0.035264531 |
| 0.12  | 0.035431069 |
| 0.056 | 0.038013183 |
| 0.077 | 0.038257237 |
| 0.172 | 0.039511258 |
| 0.162 | 0.040103251 |
| 0.288 | 0.040421188 |
| 0.037 | 0.042139137 |
| 0.29  | 0.042326463 |
| 0.059 | 0.043601499 |
| 0.039 | 0.04380178  |
| 0.038 | 0.044065341 |
| 0.066 | 0.044852847 |
| 0.088 | 0.04535613  |
| 0.169 | 0.045684748 |

|       |             |
|-------|-------------|
| 0.045 | 0.047139041 |
| 0.092 | 0.049549751 |
| 0.086 | 0.050292167 |
| 0.208 | 0.050517376 |
| 0.056 | 0.051629975 |
| 0.057 | 0.053633333 |
| 0.134 | 0.054592917 |
| 0.133 | 0.055595832 |
| 0.249 | 0.0582441   |
| 0.327 | 0.058531444 |
| 0.128 | 0.058846045 |
| 0.121 | 0.058858399 |
| 0.412 | 0.059155994 |
| 0.219 | 0.059423964 |
| 0.053 | 0.060163646 |
| 0.039 | 0.061336195 |
| 0.07  | 0.063161851 |
| 0.206 | 0.064309467 |
| 0.114 | 0.066324702 |
| 0.148 | 0.067937779 |
| 0.235 | 0.068412435 |
| 0.143 | 0.068580059 |
| 0.086 | 0.06926733  |
| 0.05  | 0.070074716 |
| 0.128 | 0.070199922 |
| 0.394 | 0.07029881  |
| 0.09  | 0.070972286 |
| 0.166 | 0.071888125 |
| 0.133 | 0.071919683 |
| 0.136 | 0.074059064 |
| 0.197 | 0.075074671 |
| 0.134 | 0.075689686 |
| 0.063 | 0.078897657 |
| 0.458 | 0.07973888  |
| 0.233 | 0.080805596 |
| 0.05  | 0.081421505 |
| 0.116 | 0.08359635  |
| 0.462 | 0.084788433 |
| 0.086 | 0.08495322  |
| 0.211 | 0.085098897 |
| 0.103 | 0.085396268 |
| 0.573 | 0.090313173 |
| 0.279 | 0.090667397 |



|       |             |
|-------|-------------|
| 0.088 | 0.091073354 |
| 0.036 | 0.091147227 |
| 0.235 | 0.091259795 |
| 0.039 | 0.093806431 |
| 0.034 | 0.096261316 |
| 0.031 | 0.096262315 |
| 0.1   | 0.097567256 |
| 0.064 | 0.1052384   |
| 0.166 | 0.107201879 |
| 0.363 | 0.109298932 |
| 0.247 | 0.110222022 |
| 0.092 | 0.11036295  |
| 0.073 | 0.111114437 |
| 0.041 | 0.112263348 |
| 0.069 | 0.112537469 |
| 0.303 | 0.112990116 |
| 0.167 | 0.114820628 |
| 0.121 | 0.115385404 |
| 0.126 | 0.119256531 |
| 0.057 | 0.120805357 |
| 0.091 | 0.120952274 |
| 0.083 | 0.121642885 |
| 0.087 | 0.121682441 |
| 0.035 | 0.123869185 |
| 0.057 | 0.128995734 |
| 0.038 | 0.129388911 |
| 0.058 | 0.130014343 |
| 0.03  | 0.130877434 |
| 0.118 | 0.13278053  |
| 0.059 | 0.132798551 |
| 0.049 | 0.13296643  |
| 0.197 | 0.136377491 |
| 0.231 | 0.140292415 |
| 0.062 | 0.142445354 |
| 0.141 | 0.142833665 |
| 0.057 | 0.145597216 |
| 0.353 | 0.147541511 |
| 0.167 | 0.149203792 |
| 0.052 | 0.150778924 |
| 0.045 | 0.152127234 |
| 0.127 | 0.153150958 |
| 0.171 | 0.15487575  |
| 0.139 | 0.156170121 |

|       |             |
|-------|-------------|
| 0.295 | 0.156612702 |
| 0.835 | 0.159928539 |
| 0.095 | 0.162917473 |
| 0.068 | 0.166457154 |
| 0.291 | 0.166655377 |
| 0.105 | 0.167061897 |
| 0.069 | 0.167119751 |
| 0.158 | 0.169914786 |
| 0.072 | 0.172345787 |
| 0.254 | 0.174035478 |
| 0.107 | 0.174674771 |
| 0.175 | 0.176411523 |
| 0.082 | 0.176757546 |
| 0.05  | 0.177314103 |
| 0.102 | 0.178076958 |
| 0.034 | 0.181125317 |
| 0.075 | 0.182097067 |
| 0.069 | 0.185010171 |
| 0.087 | 0.185365593 |
| 0.088 | 0.185555763 |
| 0.149 | 0.187500107 |
| 0.181 | 0.1893937   |
| 0.201 | 0.191817981 |
| 0.056 | 0.193990478 |
| 0.05  | 0.195764018 |
| 0.225 | 0.196227157 |
| 0.148 | 0.200731807 |
| 0.05  | 0.203270905 |
| 0.034 | 0.204373165 |
| 0.106 | 0.205468582 |
| 0.087 | 0.205684332 |
| 0.059 | 0.206189968 |
| 0.173 | 0.214317545 |
| 0.037 | 0.219155054 |
| 0.076 | 0.220733731 |
| 0.04  | 0.2237917   |
| 0.035 | 0.226883109 |
| 0.043 | 0.229682096 |
| 0.092 | 0.230314788 |
| 0.194 | 0.231921395 |
| 0.051 | 0.232805213 |
| 0.04  | 0.233120677 |
| 0.031 | 0.240498655 |

|       |             |
|-------|-------------|
| 0.164 | 0.241308258 |
| 0.052 | 0.242536344 |
| 0.039 | 0.244897962 |
| 0.067 | 0.256080285 |
| 0.127 | 0.25644365  |
| 0.072 | 0.263078284 |
| 0.112 | 0.263452874 |
| 0.12  | 0.271257773 |
| 0.053 | 0.274090895 |
| 0.077 | 0.284770099 |
| 0.055 | 0.290373607 |
| 0.076 | 0.304241562 |
| 0.241 | 0.306163404 |
| 0.037 | 0.308240757 |
| 0.173 | 0.319252193 |
| 0.041 | 0.322492586 |
| 0.124 | 0.325642814 |
| 0.104 | 0.33388653  |
| 0.115 | 0.335773028 |
| 0.09  | 0.336434275 |
| 0.032 | 0.336792273 |
| 0.161 | 0.337889369 |
| 0.06  | 0.340319207 |
| 0.086 | 0.34045826  |
| 0.074 | 0.34157917  |
| 0.119 | 0.34671855  |
| 0.063 | 0.347913156 |
| 0.038 | 0.350734025 |
| 0.191 | 0.351623914 |
| 0.064 | 0.35172105  |
| 0.233 | 0.35578583  |
| 0.298 | 0.358856861 |
| 0.046 | 0.360077642 |
| 0.074 | 0.361251893 |
| 0.036 | 0.362787187 |
| 0.055 | 0.366492964 |
| 0.066 | 0.369099399 |
| 0.067 | 0.369463116 |
| 0.048 | 0.37191161  |
| 0.064 | 0.380465793 |
| 0.072 | 0.408311031 |
| 0.152 | 0.409994069 |
| 0.116 | 0.412630806 |

|       |             |
|-------|-------------|
| 0.102 | 0.416470719 |
| 0.061 | 0.433770983 |
| 0.071 | 0.434941391 |
| 0.053 | 0.441214696 |
| 0.121 | 0.446462774 |
| 0.057 | 0.454147417 |
| 0.397 | 0.455350534 |
| 0.084 | 0.471656976 |
| 0.062 | 0.477638566 |
| 0.292 | 0.480036979 |
| 0.054 | 0.489358144 |
| 0.043 | 0.492782986 |
| 0.14  | 0.495287542 |
| 0.093 | 0.503201963 |
| 0.059 | 0.503315066 |
| 0.036 | 0.519176782 |
| 0.051 | 0.52031547  |
| 0.078 | 0.530592755 |
| 0.061 | 0.560405616 |
| 0.316 | 0.564257355 |
| 0.087 | 0.577978158 |
| 0.143 | 0.582096865 |
| 0.104 | 0.594037083 |
| 0.094 | 0.603841525 |
| 0.069 | 0.610994868 |
| 0.051 | 0.622464736 |
| 0.083 | 0.622559039 |
| 0.104 | 0.624767568 |
| 0.345 | 0.639272559 |
| 0.053 | 0.650271588 |
| 0.076 | 0.659812055 |
| 0.42  | 0.663333148 |
| 0.238 | 0.677902645 |
| 0.084 | 0.686876222 |
| 0.51  | 0.707743661 |
| 0.129 | 0.723517534 |
| 0.056 | 0.731188809 |
| 0.11  | 0.732600037 |
| 0.077 | 0.73300718  |
| 0.083 | 0.743045297 |
| 0.054 | 0.745136859 |
| 0.092 | 0.774577766 |
| 0.117 | 0.777394623 |

|       |             |
|-------|-------------|
| 0.063 | 0.779394645 |
| 0.066 | 0.794991306 |
| 0.108 | 0.825989839 |
| 0.104 | 0.826222161 |
| 0.35  | 0.827663758 |
| 0.135 | 0.830800748 |
| 0.152 | 0.840069608 |
| 0.037 | 0.843625219 |
| 0.089 | 0.859768278 |
| 0.054 | 0.876998943 |
| 0.039 | 0.884056263 |
| 0.069 | 0.89046312  |
| 0.155 | 0.891277819 |
| 0.084 | 0.892520161 |
| 0.119 | 0.91403713  |
| 0.054 | 0.930356748 |
| 0.08  | 0.943797553 |
| 0.06  | 0.948194453 |
| 0.352 | 0.987298355 |
| 0.096 | 1           |
| 0.034 | 1           |
| 0.081 | 1           |
| 0.066 | 1           |
| 0.115 | 1           |
| 0.136 | 1           |
| 0.06  | 1           |
| 0.124 | 1           |
| 0.073 | 1           |
| 0.038 | 1           |
| 0.054 | 1           |
| 0.048 | 1           |
| 0.084 | 1           |
| 0.033 | 1           |
| 0.087 | 1           |
| 0.038 | 1           |
| 0.118 | 1           |
| 0.038 | 1           |
| 0.096 | 1           |
| 0.108 | 1           |
| 0.082 | 1           |
| 0.222 | 1           |
| 0.174 | 1           |
| 0.052 | 1           |

|       |   |
|-------|---|
| 0.055 | 1 |
| 0.141 | 1 |
| 0.135 | 1 |
| 0.124 | 1 |
| 0.134 | 1 |
| 0.056 | 1 |
| 0.28  | 1 |
| 0.036 | 1 |
| 0.174 | 1 |
| 0.062 | 1 |
| 0.033 | 1 |
| 0.073 | 1 |
| 0.062 | 1 |
| 0.506 | 1 |
| 0.146 | 1 |
| 0.035 | 1 |
| 0.041 | 1 |
| 0.149 | 1 |
| 0.166 | 1 |
| 0.642 | 1 |
| 0.04  | 1 |
| 0.174 | 1 |
| 0.163 | 1 |
| 0.071 | 1 |
| 0.046 | 1 |
| 0.062 | 1 |
| 0.059 | 1 |
| 0.069 | 1 |
| 0.056 | 1 |
| 0.118 | 1 |
| 0.146 | 1 |
| 0.092 | 1 |
| 0.033 | 1 |
| 0.061 | 1 |
| 0.199 | 1 |
| 0.048 | 1 |
| 0.074 | 1 |
| 0.096 | 1 |
| 0.065 | 1 |
| 0.093 | 1 |
| 0.045 | 1 |
| 0.125 | 1 |
| 0.078 | 1 |

|       |   |
|-------|---|
| 0.198 | 1 |
| 0.124 | 1 |
| 0.115 | 1 |
| 0.149 | 1 |
| 0.097 | 1 |
| 0.315 | 1 |
| 0.05  | 1 |
| 0.052 | 1 |
| 0.104 | 1 |
| 0.038 | 1 |
| 0.102 | 1 |
| 0.125 | 1 |
| 0.189 | 1 |
| 0.149 | 1 |
| 0.113 | 1 |
| 0.073 | 1 |
| 0.256 | 1 |
| 0.145 | 1 |
| 0.053 | 1 |
| 0.178 | 1 |
| 0.087 | 1 |
| 0.071 | 1 |
| 0.041 | 1 |
| 0.052 | 1 |
| 0.071 | 1 |
| 0.033 | 1 |
| 0.119 | 1 |
| 0.117 | 1 |
| 0.106 | 1 |
| 0.048 | 1 |
| 0.069 | 1 |
| 0.068 | 1 |
| 0.062 | 1 |
| 0.062 | 1 |
| 0.101 | 1 |
| 0.05  | 1 |
| 0.053 | 1 |
| 0.04  | 1 |
| 0.062 | 1 |
| 0.366 | 1 |
| 0.251 | 1 |
| 0.107 | 1 |
| 0.055 | 1 |

|       |   |
|-------|---|
| 0.039 | 1 |
| 0.071 | 1 |
| 0.141 | 1 |
| 0.035 | 1 |
| 0.049 | 1 |
| 0.164 | 1 |
| 0.033 | 1 |
| 0.058 | 1 |
| 0.117 | 1 |
| 0.041 | 1 |
| 0.06  | 1 |
| 0.042 | 1 |
| 0.225 | 1 |
| 0.156 | 1 |
| 0.058 | 1 |
| 0.124 | 1 |
| 0.059 | 1 |
| 0.208 | 1 |
| 0.229 | 1 |
| 0.061 | 1 |
| 0.108 | 1 |
| 0.075 | 1 |
| 0.1   | 1 |
| 0.086 | 1 |
| 0.061 | 1 |
| 0.045 | 1 |
| 0.045 | 1 |
| 0.039 | 1 |
| 0.045 | 1 |
| 0.116 | 1 |
| 0.034 | 1 |
| 0.161 | 1 |
| 0.109 | 1 |
| 0.12  | 1 |
| 0.055 | 1 |
| 0.072 | 1 |
| 0.069 | 1 |
| 0.073 | 1 |
| 0.065 | 1 |
| 0.128 | 1 |
| 0.069 | 1 |
| 0.393 | 1 |
| 0.089 | 1 |



|       |   |
|-------|---|
| 0.323 | 1 |
| 0.068 | 1 |
| 0.057 | 1 |
| 0.061 | 1 |
| 0.112 | 1 |
| 0.177 | 1 |
| 0.045 | 1 |
| 0.049 | 1 |
| 0.091 | 1 |
| 0.115 | 1 |
| 0.129 | 1 |
| 0.269 | 1 |
| 0.121 | 1 |
| 0.115 | 1 |
| 0.061 | 1 |
| 0.041 | 1 |
| 0.077 | 1 |
| 0.042 | 1 |
| 0.053 | 1 |
| 0.132 | 1 |
| 0.185 | 1 |
| 0.217 | 1 |
| 0.163 | 1 |
| 0.068 | 1 |
| 0.317 | 1 |
| 0.06  | 1 |
| 0.168 | 1 |
| 0.077 | 1 |
| 0.057 | 1 |
| 0.053 | 1 |
| 0.068 | 1 |
| 0.091 | 1 |
| 0.073 | 1 |
| 0.057 | 1 |
| 0.092 | 1 |
| 0.041 | 1 |
| 0.05  | 1 |
| 0.15  | 1 |
| 0.356 | 1 |
| 0.051 | 1 |
| 0.051 | 1 |
| 0.088 | 1 |
| 0.076 | 1 |

|       |   |
|-------|---|
| 0.118 | 1 |
| 0.062 | 1 |
| 0.065 | 1 |
| 0.175 | 1 |
| 0.066 | 1 |
| 0.113 | 1 |
| 0.165 | 1 |
| 0.077 | 1 |
| 0.129 | 1 |
| 0.137 | 1 |
| 0.267 | 1 |
| 0.035 | 1 |
| 0.064 | 1 |
| 0.035 | 1 |
| 0.154 | 1 |
| 0.077 | 1 |
| 0.106 | 1 |
| 0.267 | 1 |
| 0.197 | 1 |
| 0.125 | 1 |
| 0.039 | 1 |
| 0.061 | 1 |
| 0.077 | 1 |
| 0.064 | 1 |
| 0.044 | 1 |
| 0.121 | 1 |
| 0.057 | 1 |
| 0.053 | 1 |
| 0.06  | 1 |
| 0.167 | 1 |
| 0.189 | 1 |
| 0.332 | 1 |
| 0.124 | 1 |
| 0.085 | 1 |
| 0.071 | 1 |
| 0.19  | 1 |
| 0.272 | 1 |
| 0.036 | 1 |
| 0.046 | 1 |
| 0.093 | 1 |
| 0.084 | 1 |
| 0.125 | 1 |
| 0.234 | 1 |

|       |   |
|-------|---|
| 0.162 | 1 |
| 0.209 | 1 |
| 0.055 | 1 |
| 0.076 | 1 |
| 0.204 | 1 |
| 0.04  | 1 |
| 0.088 | 1 |
| 0.07  | 1 |
| 0.086 | 1 |
| 0.123 | 1 |
| 0.055 | 1 |
| 0.147 | 1 |
| 0.08  | 1 |
| 0.062 | 1 |
| 0.131 | 1 |
| 0.107 | 1 |
| 0.108 | 1 |
| 0.265 | 1 |
| 0.067 | 1 |
| 0.054 | 1 |
| 0.134 | 1 |
| 0.082 | 1 |
| 0.166 | 1 |
| 0.07  | 1 |
| 0.217 | 1 |
| 0.076 | 1 |
| 0.065 | 1 |
| 0.179 | 1 |
| 0.295 | 1 |
| 0.098 | 1 |
| 0.238 | 1 |
| 0.061 | 1 |
| 0.073 | 1 |
| 0.051 | 1 |
| 0.137 | 1 |
| 0.255 | 1 |
| 0.052 | 1 |
| 0.199 | 1 |
| 0.134 | 1 |
| 0.041 | 1 |
| 0.157 | 1 |
| 0.037 | 1 |
| 0.221 | 1 |

|       |   |
|-------|---|
| 0.062 | 1 |
| 0.166 | 1 |
| 0.068 | 1 |
| 0.056 | 1 |
| 0.187 | 1 |
| 0.249 | 1 |
| 0.04  | 1 |
| 0.055 | 1 |
| 0.132 | 1 |
| 0.112 | 1 |
| 0.038 | 1 |
| 0.126 | 1 |
| 0.058 | 1 |
| 0.32  | 1 |
| 0.051 | 1 |
| 0.041 | 1 |
| 0.138 | 1 |
| 0.1   | 1 |
| 0.061 | 1 |
| 0.165 | 1 |
| 0.045 | 1 |
| 0.139 | 1 |
| 0.071 | 1 |
| 0.241 | 1 |
| 0.331 | 1 |
| 0.062 | 1 |
| 0.087 | 1 |
| 0.04  | 1 |
| 0.082 | 1 |
| 0.103 | 1 |
| 0.035 | 1 |
| 0.136 | 1 |
| 0.097 | 1 |
| 0.051 | 1 |
| 0.053 | 1 |
| 0.109 | 1 |
| 0.069 | 1 |
| 0.128 | 1 |
| 0.202 | 1 |
| 0.05  | 1 |
| 0.066 | 1 |
| 0.042 | 1 |
| 0.147 | 1 |

|       |   |
|-------|---|
| 0.054 | 1 |
| 0.049 | 1 |
| 0.04  | 1 |
| 0.368 | 1 |
| 0.078 | 1 |
| 0.101 | 1 |
| 0.201 | 1 |
| 0.068 | 1 |
| 0.28  | 1 |
| 0.055 | 1 |
| 0.142 | 1 |
| 0.038 | 1 |
| 0.25  | 1 |
| 0.225 | 1 |
| 0.146 | 1 |
| 0.114 | 1 |
| 0.056 | 1 |
| 0.162 | 1 |
| 0.155 | 1 |
| 0.07  | 1 |
| 0.122 | 1 |
| 0.075 | 1 |
| 0.064 | 1 |
| 0.063 | 1 |
| 0.203 | 1 |
| 0.055 | 1 |
| 0.152 | 1 |
| 0.073 | 1 |
| 0.18  | 1 |
| 0.052 | 1 |
| 0.079 | 1 |
| 0.104 | 1 |
| 0.092 | 1 |
| 0.152 | 1 |
| 0.426 | 1 |
| 0.053 | 1 |
| 0.054 | 1 |
| 0.055 | 1 |
| 0.07  | 1 |
| 0.105 | 1 |
| 0.255 | 1 |
| 0.039 | 1 |
| 0.071 | 1 |

|       |   |
|-------|---|
| 0.288 | 1 |
| 0.088 | 1 |
| 0.154 | 1 |
| 0.065 | 1 |
| 0.067 | 1 |
| 0.294 | 1 |
| 0.057 | 1 |
| 0.063 | 1 |
| 0.08  | 1 |
| 0.133 | 1 |
| 0.112 | 1 |
| 0.055 | 1 |
| 0.049 | 1 |
| 0.04  | 1 |
| 0.062 | 1 |
| 0.058 | 1 |
| 0.108 | 1 |
| 0.038 | 1 |
| 0.084 | 1 |
| 0.078 | 1 |
| 0.06  | 1 |
| 0.061 | 1 |
| 0.091 | 1 |
| 0.094 | 1 |
| 0.167 | 1 |
| 0.073 | 1 |
| 0.137 | 1 |
| 0.185 | 1 |
| 0.051 | 1 |
| 0.039 | 1 |
| 0.084 | 1 |
| 0.127 | 1 |
| 0.054 | 1 |
| 0.28  | 1 |
| 0.055 | 1 |
| 0.052 | 1 |
| 0.246 | 1 |
| 0.103 | 1 |
| 0.038 | 1 |
| 0.152 | 1 |
| 0.115 | 1 |
| 0.041 | 1 |
| 0.045 | 1 |

|       |   |
|-------|---|
| 0.088 | 1 |
| 0.097 | 1 |
| 0.132 | 1 |
| 0.084 | 1 |
| 0.076 | 1 |
| 0.101 | 1 |
| 0.042 | 1 |
| 0.246 | 1 |
| 0.071 | 1 |
| 0.041 | 1 |
| 0.357 | 1 |
| 0.071 | 1 |
| 0.084 | 1 |
| 0.094 | 1 |
| 0.07  | 1 |
| 0.048 | 1 |
| 0.101 | 1 |
| 0.134 | 1 |
| 0.039 | 1 |
| 0.044 | 1 |
| 0.1   | 1 |
| 0.165 | 1 |
| 0.067 | 1 |
| 0.071 | 1 |
| 0.086 | 1 |
| 0.074 | 1 |
| 0.041 | 1 |
| 0.073 | 1 |
| 0.085 | 1 |
| 0.109 | 1 |
| 0.04  | 1 |
| 0.038 | 1 |
| 0.092 | 1 |
| 0.051 | 1 |
| 0.06  | 1 |
| 0.065 | 1 |
| 0.28  | 1 |
| 0.047 | 1 |
| 0.064 | 1 |
| 0.057 | 1 |
| 0.149 | 1 |
| 0.048 | 1 |
| 0.056 | 1 |

|       |   |
|-------|---|
| 0.046 | 1 |
| 0.296 | 1 |
| 0.078 | 1 |
| 0.126 | 1 |
| 0.06  | 1 |
| 0.06  | 1 |
| 0.124 | 1 |
| 0.071 | 1 |
| 0.085 | 1 |
| 0.159 | 1 |
| 0.241 | 1 |
| 0.217 | 1 |
| 0.114 | 1 |
| 0.122 | 1 |
| 0.051 | 1 |
| 0.189 | 1 |
| 0.047 | 1 |
| 0.096 | 1 |
| 0.112 | 1 |
| 0.071 | 1 |
| 0.076 | 1 |
| 0.052 | 1 |
| 0.079 | 1 |
| 0.048 | 1 |
| 0.076 | 1 |
| 0.038 | 1 |
| 0.085 | 1 |
| 0.176 | 1 |
| 0.048 | 1 |
| 0.109 | 1 |
| 0.21  | 1 |
| 0.04  | 1 |
| 0.065 | 1 |
| 0.623 | 1 |
| 0.082 | 1 |
| 0.085 | 1 |
| 0.121 | 1 |
| 0.057 | 1 |
| 0.052 | 1 |
| 0.157 | 1 |
| 0.096 | 1 |
| 0.05  | 1 |
| 0.4   | 1 |



|       |   |
|-------|---|
| 0.065 | 1 |
| 0.108 | 1 |
| 0.057 | 1 |
| 0.116 | 1 |
| 0.039 | 1 |
| 0.183 | 1 |
| 0.117 | 1 |
| 0.109 | 1 |
| 0.042 | 1 |
| 0.037 | 1 |
| 0.174 | 1 |
| 0.085 | 1 |
| 0.065 | 1 |
| 0.059 | 1 |
| 0.181 | 1 |
| 0.045 | 1 |
| 0.075 | 1 |
| 0.077 | 1 |
| 0.037 | 1 |
| 0.2   | 1 |
| 0.056 | 1 |
| 0.044 | 1 |
| 0.275 | 1 |
| 0.128 | 1 |
| 0.039 | 1 |
| 0.048 | 1 |
| 0.089 | 1 |
| 0.071 | 1 |
| 0.058 | 1 |
| 0.113 | 1 |
| 0.052 | 1 |
| 0.068 | 1 |
| 0.078 | 1 |
| 0.082 | 1 |
| 0.142 | 1 |
| 0.038 | 1 |
| 0.048 | 1 |
| 0.065 | 1 |
| 0.118 | 1 |
| 0.073 | 1 |
| 0.376 | 1 |
| 0.089 | 1 |
| 0.055 | 1 |

|       |   |
|-------|---|
| 0.115 | 1 |
| 0.058 | 1 |
| 0.216 | 1 |
| 0.078 | 1 |
| 0.185 | 1 |
| 0.061 | 1 |
| 0.054 | 1 |
| 0.068 | 1 |
| 0.081 | 1 |
| 0.145 | 1 |
| 0.108 | 1 |
| 0.182 | 1 |
| 0.065 | 1 |
| 0.056 | 1 |
| 0.235 | 1 |
| 0.065 | 1 |
| 0.045 | 1 |
| 0.112 | 1 |
| 0.241 | 1 |
| 0.156 | 1 |
| 0.039 | 1 |
| 0.15  | 1 |
| 0.074 | 1 |
| 0.088 | 1 |
| 0.18  | 1 |
| 0.081 | 1 |
| 0.048 | 1 |
| 0.267 | 1 |
| 0.09  | 1 |
| 0.235 | 1 |
| 0.116 | 1 |
| 0.198 | 1 |
| 0.057 | 1 |
| 0.122 | 1 |
| 0.123 | 1 |
| 0.051 | 1 |
| 0.04  | 1 |
| 0.094 | 1 |
| 0.067 | 1 |
| 0.074 | 1 |
| 0.077 | 1 |
| 0.049 | 1 |
| 0.15  | 1 |

|       |   |
|-------|---|
| 0.602 | 1 |
| 0.235 | 1 |
| 0.376 | 1 |
| 0.155 | 1 |
| 0.053 | 1 |
| 0.173 | 1 |
| 0.402 | 1 |
| 0.051 | 1 |
| 0.046 | 1 |
| 0.062 | 1 |
| 0.053 | 1 |
| 0.054 | 1 |
| 0.077 | 1 |
| 0.06  | 1 |
| 0.14  | 1 |
| 0.062 | 1 |
| 0.164 | 1 |
| 0.088 | 1 |
| 0.07  | 1 |
| 0.076 | 1 |
| 0.058 | 1 |
| 0.067 | 1 |
| 0.201 | 1 |
| 0.257 | 1 |
| 0.073 | 1 |
| 0.099 | 1 |
| 0.268 | 1 |
| 0.072 | 1 |
| 0.038 | 1 |
| 0.21  | 1 |
| 0.24  | 1 |
| 0.038 | 1 |
| 0.101 | 1 |
| 0.089 | 1 |
| 0.162 | 1 |
| 0.081 | 1 |
| 0.232 | 1 |
| 0.088 | 1 |
| 0.17  | 1 |
| 0.11  | 1 |
| 0.052 | 1 |
| 0.191 | 1 |
| 0.253 | 1 |

|       |   |
|-------|---|
| 0.148 | 1 |
| 0.049 | 1 |
| 0.061 | 1 |
| 0.071 | 1 |
| 0.124 | 1 |
| 0.088 | 1 |
| 0.168 | 1 |
| 0.328 | 1 |
| 0.044 | 1 |
| 0.186 | 1 |
| 0.062 | 1 |
| 0.261 | 1 |
| 0.113 | 1 |
| 0.106 | 1 |
| 0.082 | 1 |
| 0.144 | 1 |
| 0.203 | 1 |
| 0.051 | 1 |
| 0.175 | 1 |
| 0.043 | 1 |
| 0.066 | 1 |
| 0.04  | 1 |
| 0.092 | 1 |
| 0.108 | 1 |
| 0.108 | 1 |
| 0.13  | 1 |
| 0.041 | 1 |
| 0.04  | 1 |
| 0.315 | 1 |
| 0.057 | 1 |
| 0.093 | 1 |
| 0.249 | 1 |
| 0.2   | 1 |
| 0.047 | 1 |
| 0.056 | 1 |
| 0.127 | 1 |
| 0.069 | 1 |
| 0.056 | 1 |
| 0.064 | 1 |
| 0.04  | 1 |
| 0.117 | 1 |
| 0.091 | 1 |
| 0.199 | 1 |

|       |   |
|-------|---|
| 0.057 | 1 |
| 0.075 | 1 |
| 0.097 | 1 |
| 0.153 | 1 |
| 0.09  | 1 |
| 0.061 | 1 |
| 0.063 | 1 |
| 0.142 | 1 |
| 0.057 | 1 |
| 0.139 | 1 |
| 0.301 | 1 |
| 0.121 | 1 |
| 0.053 | 1 |
| 0.116 | 1 |
| 0.087 | 1 |
| 0.085 | 1 |
| 0.041 | 1 |
| 0.062 | 1 |
| 0.06  | 1 |
| 0.097 | 1 |
| 0.153 | 1 |
| 0.094 | 1 |
| 0.038 | 1 |
| 0.047 | 1 |
| 0.086 | 1 |
| 0.06  | 1 |
| 0.105 | 1 |
| 0.159 | 1 |
| 0.086 | 1 |
| 0.069 | 1 |
| 0.151 | 1 |
| 0.066 | 1 |
| 0.089 | 1 |
| 0.054 | 1 |
| 0.067 | 1 |
| 0.075 | 1 |
| 0.086 | 1 |
| 0.245 | 1 |
| 0.065 | 1 |
| 0.191 | 1 |
| 0.049 | 1 |
| 0.069 | 1 |
| 0.178 | 1 |

|       |   |
|-------|---|
| 0.043 | 1 |
| 0.118 | 1 |
| 0.068 | 1 |
| 0.136 | 1 |
| 0.157 | 1 |
| 0.146 | 1 |
| 0.067 | 1 |
| 0.082 | 1 |
| 0.055 | 1 |
| 0.076 | 1 |
| 0.279 | 1 |
| 0.062 | 1 |
| 0.111 | 1 |
| 0.087 | 1 |
| 0.132 | 1 |
| 0.067 | 1 |
| 0.081 | 1 |
| 0.09  | 1 |
| 0.053 | 1 |
| 0.085 | 1 |
| 0.139 | 1 |
| 0.041 | 1 |
| 0.04  | 1 |
| 0.202 | 1 |
| 0.149 | 1 |
| 0.679 | 1 |
| 0.09  | 1 |
| 0.114 | 1 |
| 0.044 | 1 |
| 0.051 | 1 |
| 0.208 | 1 |
| 0.073 | 1 |
| 0.11  | 1 |
| 0.093 | 1 |
| 0.055 | 1 |
| 0.064 | 1 |
| 0.064 | 1 |
| 0.07  | 1 |
| 0.196 | 1 |
| 0.174 | 1 |
| 0.096 | 1 |
| 0.145 | 1 |
| 0.128 | 1 |

|       |   |
|-------|---|
| 0.056 | 1 |
| 0.064 | 1 |
| 0.082 | 1 |
| 0.067 | 1 |
| 0.101 | 1 |
| 0.088 | 1 |
| 0.05  | 1 |
| 0.053 | 1 |
| 0.11  | 1 |
| 0.068 | 1 |
| 0.055 | 1 |
| 0.056 | 1 |
| 0.095 | 1 |
| 0.075 | 1 |
| 0.112 | 1 |
| 0.067 | 1 |
| 0.052 | 1 |
| 0.08  | 1 |
| 0.096 | 1 |
| 0.051 | 1 |
| 0.142 | 1 |
| 0.129 | 1 |
| 0.069 | 1 |
| 0.054 | 1 |
| 0.146 | 1 |
| 0.527 | 1 |
| 0.05  | 1 |
| 0.049 | 1 |
| 0.23  | 1 |
| 0.237 | 1 |
| 0.076 | 1 |
| 0.053 | 1 |
| 0.175 | 1 |
| 0.161 | 1 |
| 0.062 | 1 |
| 0.097 | 1 |
| 0.05  | 1 |
| 0.043 | 1 |
| 0.047 | 1 |
| 0.175 | 1 |
| 0.091 | 1 |
| 0.126 | 1 |
| 0.071 | 1 |

|       |   |
|-------|---|
| 0.07  | 1 |
| 0.078 | 1 |
| 0.077 | 1 |
| 0.052 | 1 |
| 0.05  | 1 |
| 0.044 | 1 |
| 0.134 | 1 |
| 0.041 | 1 |
| 0.062 | 1 |
| 0.04  | 1 |
| 0.074 | 1 |
| 0.053 | 1 |
| 0.04  | 1 |
| 0.229 | 1 |
| 0.05  | 1 |
| 0.074 | 1 |
| 0.043 | 1 |
| 0.111 | 1 |
| 0.045 | 1 |
| 0.116 | 1 |
| 0.107 | 1 |
| 0.177 | 1 |
| 0.146 | 1 |
| 0.042 | 1 |
| 0.055 | 1 |
| 0.042 | 1 |
| 0.051 | 1 |
| 0.048 | 1 |
| 0.131 | 1 |
| 0.082 | 1 |
| 0.106 | 1 |
| 0.065 | 1 |
| 0.088 | 1 |
| 0.065 | 1 |
| 0.134 | 1 |
| 0.129 | 1 |
| 0.063 | 1 |
| 0.071 | 1 |
| 0.118 | 1 |
| 0.047 | 1 |
| 0.07  | 1 |
| 0.078 | 1 |
| 0.108 | 1 |



|       |   |
|-------|---|
| 0.083 | 1 |
| 0.082 | 1 |
| 0.107 | 1 |
| 0.152 | 1 |
| 0.136 | 1 |
| 0.074 | 1 |
| 0.066 | 1 |
| 0.095 | 1 |
| 0.061 | 1 |
| 0.117 | 1 |
| 0.055 | 1 |
| 0.048 | 1 |
| 0.056 | 1 |
| 0.065 | 1 |
| 0.134 | 1 |
| 0.156 | 1 |
| 0.229 | 1 |
| 0.051 | 1 |
| 0.074 | 1 |
| 0.113 | 1 |
| 0.064 | 1 |
| 0.043 | 1 |
| 0.057 | 1 |
| 0.081 | 1 |
| 0.063 | 1 |
| 0.051 | 1 |
| 0.058 | 1 |
| 0.139 | 1 |
| 0.18  | 1 |
| 0.1   | 1 |
| 0.076 | 1 |
| 0.06  | 1 |
| 0.087 | 1 |
| 0.05  | 1 |
| 0.087 | 1 |
| 0.192 | 1 |
| 0.075 | 1 |
| 0.242 | 1 |
| 0.076 | 1 |
| 0.114 | 1 |
| 0.121 | 1 |
| 0.082 | 1 |
| 0.149 | 1 |

|       |   |
|-------|---|
| 0.127 | 1 |
| 0.087 | 1 |
| 0.057 | 1 |
| 0.145 | 1 |
| 0.059 | 1 |
| 0.141 | 1 |
| 0.083 | 1 |
| 0.05  | 1 |
| 0.085 | 1 |
| 0.051 | 1 |
| 0.105 | 1 |
| 0.091 | 1 |
| 0.042 | 1 |
| 0.057 | 1 |
| 0.054 | 1 |
| 0.064 | 1 |
| 0.071 | 1 |
| 0.287 | 1 |
| 0.065 | 1 |
| 0.158 | 1 |
| 0.046 | 1 |
| 0.269 | 1 |
| 0.059 | 1 |
| 0.054 | 1 |
| 0.083 | 1 |
| 0.106 | 1 |
| 0.126 | 1 |
| 0.141 | 1 |
| 0.052 | 1 |
| 0.145 | 1 |
| 0.114 | 1 |
| 0.04  | 1 |
| 0.233 | 1 |
| 0.063 | 1 |
| 0.042 | 1 |
| 0.054 | 1 |
| 0.133 | 1 |
| 0.092 | 1 |
| 0.059 | 1 |
| 0.074 | 1 |
| 0.086 | 1 |
| 0.083 | 1 |
| 0.062 | 1 |

|       |   |
|-------|---|
| 0.051 | 1 |
| 0.094 | 1 |
| 0.1   | 1 |
| 0.109 | 1 |
| 0.293 | 1 |
| 0.097 | 1 |
| 0.056 | 1 |
| 0.097 | 1 |
| 0.129 | 1 |
| 0.049 | 1 |
| 0.113 | 1 |
| 0.152 | 1 |
| 0.074 | 1 |
| 0.263 | 1 |
| 0.063 | 1 |
| 0.088 | 1 |
| 0.069 | 1 |
| 0.056 | 1 |
| 0.071 | 1 |
| 0.186 | 1 |
| 0.052 | 1 |
| 0.102 | 1 |
| 0.065 | 1 |
| 0.056 | 1 |
| 0.057 | 1 |
| 0.398 | 1 |
| 0.072 | 1 |
| 0.077 | 1 |
| 0.088 | 1 |
| 0.069 | 1 |
| 0.065 | 1 |
| 0.064 | 1 |
| 0.091 | 1 |
| 0.088 | 1 |
| 0.049 | 1 |
| 0.077 | 1 |
| 0.047 | 1 |
| 0.12  | 1 |
| 0.096 | 1 |
| 0.147 | 1 |
| 0.054 | 1 |
| 0.065 | 1 |
| 0.043 | 1 |

|       |   |
|-------|---|
| 0.077 | 1 |
| 0.099 | 1 |
| 0.051 | 1 |
| 0.209 | 1 |
| 0.124 | 1 |
| 0.093 | 1 |
| 0.108 | 1 |
| 0.094 | 1 |
| 0.115 | 1 |
| 0.101 | 1 |
| 0.063 | 1 |
| 0.041 | 1 |
| 0.055 | 1 |
| 0.154 | 1 |
| 0.097 | 1 |
| 0.095 | 1 |
| 0.043 | 1 |
| 0.056 | 1 |
| 0.07  | 1 |
| 0.057 | 1 |
| 0.206 | 1 |
| 0.101 | 1 |
| 0.13  | 1 |
| 0.071 | 1 |
| 0.076 | 1 |
| 0.042 | 1 |
| 0.187 | 1 |
| 0.055 | 1 |
| 0.146 | 1 |
| 0.105 | 1 |
| 0.048 | 1 |
| 0.31  | 1 |
| 0.1   | 1 |
| 0.167 | 1 |
| 0.05  | 1 |
| 0.056 | 1 |
| 0.043 | 1 |
| 0.102 | 1 |
| 0.134 | 1 |
| 0.077 | 1 |
| 0.055 | 1 |
| 0.072 | 1 |
| 0.089 | 1 |

|       |   |
|-------|---|
| 0.127 | 1 |
| 0.056 | 1 |
| 0.053 | 1 |
| 0.062 | 1 |
| 0.085 | 1 |
| 0.109 | 1 |
| 0.244 | 1 |
| 0.115 | 1 |
| 0.294 | 1 |
| 0.091 | 1 |
| 0.135 | 1 |
| 0.143 | 1 |
| 0.043 | 1 |
| 0.135 | 1 |
| 0.061 | 1 |
| 0.041 | 1 |
| 0.184 | 1 |
| 0.061 | 1 |
| 0.1   | 1 |
| 0.069 | 1 |
| 0.068 | 1 |
| 0.045 | 1 |
| 0.099 | 1 |
| 0.051 | 1 |
| 0.493 | 1 |
| 0.106 | 1 |
| 0.091 | 1 |
| 0.098 | 1 |
| 0.089 | 1 |
| 0.116 | 1 |
| 0.072 | 1 |
| 0.042 | 1 |
| 0.091 | 1 |
| 0.095 | 1 |
| 0.042 | 1 |
| 0.055 | 1 |
| 0.044 | 1 |
| 0.082 | 1 |
| 0.113 | 1 |
| 0.056 | 1 |
| 0.069 | 1 |
| 0.206 | 1 |
| 0.109 | 1 |

|       |   |
|-------|---|
| 0.059 | 1 |
| 0.054 | 1 |
| 0.137 | 1 |
| 0.078 | 1 |
| 0.051 | 1 |
| 0.076 | 1 |
| 0.057 | 1 |
| 0.059 | 1 |
| 0.054 | 1 |
| 0.257 | 1 |
| 0.086 | 1 |
| 0.085 | 1 |
| 0.101 | 1 |
| 0.089 | 1 |
| 0.069 | 1 |
| 0.144 | 1 |
| 0.411 | 1 |
| 0.149 | 1 |
| 0.13  | 1 |
| 0.096 | 1 |
| 0.058 | 1 |
| 0.114 | 1 |
| 0.085 | 1 |
| 0.07  | 1 |
| 0.06  | 1 |
| 0.199 | 1 |
| 0.082 | 1 |
| 0.063 | 1 |
| 0.067 | 1 |
| 0.078 | 1 |
| 0.127 | 1 |
| 0.077 | 1 |
| 0.06  | 1 |
| 0.063 | 1 |
| 0.062 | 1 |
| 0.207 | 1 |
| 0.095 | 1 |
| 0.049 | 1 |
| 0.158 | 1 |
| 0.047 | 1 |
| 0.046 | 1 |
| 0.154 | 1 |
| 0.057 | 1 |

|       |   |
|-------|---|
| 0.061 | 1 |
| 0.068 | 1 |
| 0.075 | 1 |
| 0.133 | 1 |
| 0.059 | 1 |
| 0.065 | 1 |
| 0.135 | 1 |
| 0.187 | 1 |
| 0.088 | 1 |
| 0.049 | 1 |
| 0.052 | 1 |
| 0.191 | 1 |
| 0.049 | 1 |
| 0.218 | 1 |
| 0.072 | 1 |
| 0.058 | 1 |
| 0.059 | 1 |
| 0.16  | 1 |
| 0.046 | 1 |
| 0.104 | 1 |
| 0.045 | 1 |
| 0.44  | 1 |
| 0.183 | 1 |
| 0.17  | 1 |
| 0.093 | 1 |
| 0.05  | 1 |
| 0.16  | 1 |
| 0.057 | 1 |
| 0.056 | 1 |
| 0.052 | 1 |
| 0.042 | 1 |
| 0.082 | 1 |
| 0.049 | 1 |
| 0.049 | 1 |
| 0.099 | 1 |
| 0.098 | 1 |
| 0.062 | 1 |
| 0.044 | 1 |
| 0.056 | 1 |
| 0.568 | 1 |
| 0.059 | 1 |
| 0.043 | 1 |
| 0.075 | 1 |

|       |   |
|-------|---|
| 0.149 | 1 |
| 0.106 | 1 |
| 0.123 | 1 |
| 0.061 | 1 |
| 0.201 | 1 |
| 0.725 | 1 |
| 0.148 | 1 |
| 0.047 | 1 |
| 0.365 | 1 |
| 0.092 | 1 |
| 0.049 | 1 |
| 0.121 | 1 |
| 0.191 | 1 |
| 0.131 | 1 |
| 0.071 | 1 |
| 0.048 | 1 |
| 0.114 | 1 |
| 0.161 | 1 |
| 0.057 | 1 |
| 0.059 | 1 |
| 0.089 | 1 |
| 0.224 | 1 |
| 0.115 | 1 |
| 0.058 | 1 |
| 0.082 | 1 |
| 0.186 | 1 |
| 0.313 | 1 |
| 0.055 | 1 |
| 0.043 | 1 |
| 0.069 | 1 |
| 0.363 | 1 |
| 0.135 | 1 |
| 0.195 | 1 |
| 0.128 | 1 |
| 0.064 | 1 |
| 0.086 | 1 |
| 0.074 | 1 |
| 0.043 | 1 |
| 0.066 | 1 |
| 0.269 | 1 |
| 0.066 | 1 |
| 0.081 | 1 |
| 0.05  | 1 |



|       |   |
|-------|---|
| 0.205 | 1 |
| 0.042 | 1 |
| 0.072 | 1 |
| 0.218 | 1 |
| 0.1   | 1 |
| 0.067 | 1 |
| 0.055 | 1 |
| 0.232 | 1 |
| 0.079 | 1 |
| 0.147 | 1 |
| 0.084 | 1 |
| 0.043 | 1 |
| 0.164 | 1 |
| 0.083 | 1 |
| 0.188 | 1 |
| 0.123 | 1 |
| 0.043 | 1 |
| 0.081 | 1 |
| 0.055 | 1 |
| 0.075 | 1 |
| 0.123 | 1 |
| 0.076 | 1 |
| 0.054 | 1 |
| 0.083 | 1 |
| 0.229 | 1 |
| 0.09  | 1 |
| 0.067 | 1 |
| 0.109 | 1 |
| 0.209 | 1 |
| 0.077 | 1 |
| 0.091 | 1 |
| 0.275 | 1 |
| 0.096 | 1 |
| 0.105 | 1 |
| 0.412 | 1 |
| 0.095 | 1 |
| 0.068 | 1 |
| 0.07  | 1 |
| 0.095 | 1 |
| 0.056 | 1 |
| 0.066 | 1 |
| 0.125 | 1 |
| 0.093 | 1 |

|       |   |
|-------|---|
| 0.129 | 1 |
| 0.072 | 1 |
| 0.063 | 1 |
| 0.389 | 1 |
| 0.074 | 1 |
| 0.14  | 1 |
| 0.052 | 1 |
| 0.066 | 1 |
| 0.09  | 1 |
| 0.193 | 1 |
| 0.071 | 1 |
| 0.144 | 1 |
| 0.382 | 1 |
| 0.08  | 1 |
| 0.182 | 1 |
| 0.118 | 1 |
| 0.351 | 1 |
| 0.167 | 1 |
| 0.171 | 1 |
| 0.092 | 1 |
| 0.082 | 1 |
| 0.105 | 1 |
| 0.291 | 1 |
| 0.052 | 1 |
| 0.067 | 1 |
| 0.064 | 1 |
| 0.058 | 1 |
| 0.048 | 1 |
| 0.161 | 1 |
| 0.043 | 1 |
| 0.047 | 1 |
| 0.088 | 1 |
| 0.287 | 1 |
| 0.097 | 1 |
| 0.1   | 1 |
| 0.065 | 1 |
| 0.088 | 1 |
| 0.198 | 1 |
| 0.129 | 1 |
| 0.073 | 1 |
| 0.065 | 1 |
| 0.059 | 1 |
| 0.23  | 1 |

|       |   |
|-------|---|
| 0.083 | 1 |
| 0.104 | 1 |
| 0.09  | 1 |
| 0.088 | 1 |
| 0.153 | 1 |
| 0.1   | 1 |
| 0.078 | 1 |
| 0.153 | 1 |
| 0.131 | 1 |
| 0.085 | 1 |
| 0.129 | 1 |
| 0.163 | 1 |
| 0.066 | 1 |
| 0.067 | 1 |
| 0.06  | 1 |
| 0.055 | 1 |
| 0.068 | 1 |
| 0.189 | 1 |
| 0.109 | 1 |
| 0.261 | 1 |
| 0.104 | 1 |
| 0.084 | 1 |
| 0.182 | 1 |
| 0.065 | 1 |
| 0.052 | 1 |
| 0.05  | 1 |
| 0.09  | 1 |
| 0.055 | 1 |
| 0.07  | 1 |
| 0.375 | 1 |
| 0.128 | 1 |
| 0.094 | 1 |
| 0.121 | 1 |
| 0.125 | 1 |
| 0.048 | 1 |
| 0.155 | 1 |
| 0.334 | 1 |
| 0.06  | 1 |
| 0.15  | 1 |
| 0.073 | 1 |
| 0.055 | 1 |
| 0.247 | 1 |
| 0.107 | 1 |

|       |   |
|-------|---|
| 0.075 | 1 |
| 0.045 | 1 |
| 0.083 | 1 |
| 0.246 | 1 |
| 0.056 | 1 |
| 0.386 | 1 |
| 0.108 | 1 |
| 0.3   | 1 |
| 0.101 | 1 |
| 0.201 | 1 |
| 0.144 | 1 |
| 0.149 | 1 |
| 0.071 | 1 |
| 0.082 | 1 |
| 0.12  | 1 |
| 0.132 | 1 |
| 0.138 | 1 |
| 0.068 | 1 |
| 0.07  | 1 |
| 0.072 | 1 |
| 0.095 | 1 |
| 0.086 | 1 |
| 0.05  | 1 |
| 0.105 | 1 |
| 0.056 | 1 |
| 0.066 | 1 |
| 0.077 | 1 |
| 0.117 | 1 |
| 0.131 | 1 |
| 0.071 | 1 |
| 0.062 | 1 |
| 0.073 | 1 |
| 0.133 | 1 |
| 0.136 | 1 |
| 0.068 | 1 |
| 0.086 | 1 |
| 0.051 | 1 |
| 0.044 | 1 |
| 0.085 | 1 |
| 0.217 | 1 |
| 0.238 | 1 |
| 0.254 | 1 |
| 0.073 | 1 |

|       |   |
|-------|---|
| 0.063 | 1 |
| 0.056 | 1 |
| 0.181 | 1 |
| 0.092 | 1 |
| 0.077 | 1 |
| 0.141 | 1 |
| 0.101 | 1 |
| 0.06  | 1 |
| 0.1   | 1 |
| 0.182 | 1 |
| 0.185 | 1 |
| 0.135 | 1 |
| 0.052 | 1 |
| 0.14  | 1 |
| 0.076 | 1 |
| 0.053 | 1 |
| 0.073 | 1 |
| 0.071 | 1 |
| 0.054 | 1 |
| 0.08  | 1 |
| 0.047 | 1 |
| 0.102 | 1 |
| 0.095 | 1 |
| 0.075 | 1 |
| 0.149 | 1 |
| 0.13  | 1 |
| 0.053 | 1 |
| 0.063 | 1 |
| 0.069 | 1 |
| 0.111 | 1 |
| 0.055 | 1 |
| 0.279 | 1 |
| 0.076 | 1 |
| 0.117 | 1 |
| 0.089 | 1 |
| 0.054 | 1 |
| 0.101 | 1 |
| 0.074 | 1 |
| 0.05  | 1 |
| 0.073 | 1 |
| 0.068 | 1 |
| 0.055 | 1 |
| 0.123 | 1 |

|       |   |
|-------|---|
| 0.098 | 1 |
| 0.101 | 1 |
| 0.046 | 1 |
| 0.21  | 1 |
| 0.071 | 1 |
| 0.062 | 1 |
| 0.159 | 1 |
| 0.123 | 1 |
| 0.051 | 1 |
| 0.065 | 1 |
| 0.123 | 1 |
| 0.06  | 1 |
| 0.063 | 1 |
| 0.057 | 1 |
| 0.057 | 1 |
| 0.188 | 1 |
| 0.085 | 1 |
| 0.131 | 1 |
| 0.059 | 1 |
| 0.077 | 1 |
| 0.058 | 1 |
| 0.125 | 1 |
| 0.048 | 1 |
| 0.109 | 1 |
| 0.168 | 1 |
| 0.055 | 1 |
| 0.064 | 1 |
| 0.055 | 1 |
| 0.066 | 1 |
| 0.302 | 1 |
| 0.156 | 1 |
| 0.051 | 1 |
| 0.055 | 1 |
| 0.372 | 1 |
| 0.064 | 1 |
| 0.051 | 1 |
| 0.045 | 1 |
| 0.08  | 1 |
| 0.093 | 1 |
| 0.061 | 1 |
| 0.079 | 1 |
| 0.082 | 1 |
| 0.071 | 1 |

|       |   |
|-------|---|
| 0.206 | 1 |
| 0.245 | 1 |
| 0.059 | 1 |
| 0.116 | 1 |
| 0.059 | 1 |
| 0.135 | 1 |
| 0.187 | 1 |
| 0.07  | 1 |
| 0.052 | 1 |
| 0.163 | 1 |
| 0.052 | 1 |
| 0.066 | 1 |
| 0.075 | 1 |
| 0.121 | 1 |
| 0.055 | 1 |
| 0.095 | 1 |
| 0.056 | 1 |
| 0.055 | 1 |
| 0.068 | 1 |
| 0.054 | 1 |
| 0.066 | 1 |
| 0.103 | 1 |
| 0.053 | 1 |
| 0.064 | 1 |
| 0.066 | 1 |
| 0.096 | 1 |
| 0.068 | 1 |
| 0.066 | 1 |
| 0.056 | 1 |
| 0.206 | 1 |
| 0.086 | 1 |
| 0.142 | 1 |
| 0.074 | 1 |
| 0.078 | 1 |
| 0.051 | 1 |
| 0.622 | 1 |
| 0.054 | 1 |
| 0.068 | 1 |
| 0.14  | 1 |
| 0.061 | 1 |
| 0.139 | 1 |
| 0.128 | 1 |
| 0.051 | 1 |

|       |   |
|-------|---|
| 0.126 | 1 |
| 0.046 | 1 |
| 0.09  | 1 |
| 0.103 | 1 |
| 0.08  | 1 |
| 0.133 | 1 |
| 0.265 | 1 |
| 0.188 | 1 |
| 0.056 | 1 |
| 0.054 | 1 |
| 0.129 | 1 |
| 0.111 | 1 |
| 0.057 | 1 |
| 0.061 | 1 |
| 0.087 | 1 |
| 0.143 | 1 |
| 0.062 | 1 |
| 0.055 | 1 |
| 0.073 | 1 |
| 0.101 | 1 |
| 0.118 | 1 |
| 0.057 | 1 |
| 0.094 | 1 |
| 0.053 | 1 |
| 0.079 | 1 |
| 0.065 | 1 |
| 0.178 | 1 |
| 0.057 | 1 |
| 0.442 | 1 |
| 0.313 | 1 |
| 0.107 | 1 |
| 0.139 | 1 |
| 0.15  | 1 |
| 0.059 | 1 |
| 0.181 | 1 |
| 0.083 | 1 |
| 0.111 | 1 |
| 0.156 | 1 |
| 0.077 | 1 |
| 0.058 | 1 |
| 0.065 | 1 |
| 0.051 | 1 |
| 0.052 | 1 |



|       |   |
|-------|---|
| 0.076 | 1 |
| 0.087 | 1 |
| 0.058 | 1 |
| 0.06  | 1 |
| 0.141 | 1 |
| 0.052 | 1 |
| 0.064 | 1 |
| 0.147 | 1 |
| 0.111 | 1 |
| 0.065 | 1 |
| 0.046 | 1 |
| 0.06  | 1 |
| 0.144 | 1 |
| 0.102 | 1 |
| 0.072 | 1 |
| 0.058 | 1 |
| 0.062 | 1 |
| 0.082 | 1 |
| 0.135 | 1 |
| 0.108 | 1 |
| 0.294 | 1 |
| 0.067 | 1 |
| 0.057 | 1 |
| 0.053 | 1 |
| 0.047 | 1 |
| 0.054 | 1 |
| 0.263 | 1 |
| 0.053 | 1 |
| 0.075 | 1 |
| 0.055 | 1 |
| 0.176 | 1 |
| 0.175 | 1 |
| 0.146 | 1 |
| 0.053 | 1 |
| 0.138 | 1 |
| 0.078 | 1 |
| 0.214 | 1 |
| 0.093 | 1 |
| 0.069 | 1 |
| 0.066 | 1 |
| 0.05  | 1 |
| 0.059 | 1 |
| 0.05  | 1 |

|       |   |
|-------|---|
| 0.055 | 1 |
| 0.053 | 1 |
| 0.048 | 1 |
| 0.058 | 1 |
| 0.048 | 1 |
| 0.064 | 1 |
| 0.057 | 1 |
| 0.089 | 1 |
| 0.081 | 1 |
| 0.102 | 1 |
| 0.186 | 1 |
| 0.154 | 1 |
| 0.066 | 1 |
| 0.144 | 1 |
| 0.068 | 1 |
| 0.074 | 1 |
| 0.064 | 1 |
| 0.07  | 1 |
| 0.219 | 1 |
| 0.106 | 1 |
| 0.092 | 1 |
| 0.079 | 1 |
| 0.051 | 1 |
| 0.097 | 1 |
| 0.151 | 1 |
| 0.156 | 1 |
| 0.067 | 1 |
| 0.448 | 1 |
| 0.113 | 1 |
| 0.213 | 1 |
| 0.086 | 1 |
| 0.18  | 1 |
| 0.053 | 1 |
| 0.094 | 1 |
| 0.09  | 1 |
| 0.064 | 1 |
| 0.071 | 1 |
| 0.081 | 1 |
| 0.052 | 1 |
| 0.052 | 1 |
| 0.117 | 1 |
| 0.201 | 1 |
| 0.103 | 1 |

|       |   |
|-------|---|
| 0.11  | 1 |
| 0.079 | 1 |
| 0.154 | 1 |
| 0.081 | 1 |
| 0.063 | 1 |
| 0.187 | 1 |
| 0.124 | 1 |
| 0.066 | 1 |
| 0.089 | 1 |
| 0.06  | 1 |
| 0.156 | 1 |
| 0.171 | 1 |
| 0.071 | 1 |
| 0.078 | 1 |
| 0.059 | 1 |
| 0.073 | 1 |
| 0.056 | 1 |
| 0.207 | 1 |
| 0.092 | 1 |
| 0.088 | 1 |
| 0.372 | 1 |
| 0.078 | 1 |
| 0.106 | 1 |
| 0.076 | 1 |
| 0.131 | 1 |
| 0.051 | 1 |
| 0.079 | 1 |
| 0.066 | 1 |
| 0.068 | 1 |
| 0.144 | 1 |
| 0.086 | 1 |
| 0.136 | 1 |
| 0.107 | 1 |
| 0.124 | 1 |
| 0.078 | 1 |
| 0.186 | 1 |
| 0.063 | 1 |
| 0.141 | 1 |
| 0.087 | 1 |
| 0.062 | 1 |
| 0.058 | 1 |
| 0.106 | 1 |
| 0.198 | 1 |

|       |   |
|-------|---|
| 0.079 | 1 |
| 0.049 | 1 |
| 0.064 | 1 |
| 0.108 | 1 |
| 0.075 | 1 |
| 0.22  | 1 |
| 0.114 | 1 |
| 0.087 | 1 |
| 0.223 | 1 |
| 0.081 | 1 |
| 0.15  | 1 |
| 0.063 | 1 |
| 0.085 | 1 |
| 0.379 | 1 |
| 0.117 | 1 |
| 0.166 | 1 |
| 0.121 | 1 |
| 0.075 | 1 |
| 0.08  | 1 |
| 0.076 | 1 |
| 0.06  | 1 |
| 0.059 | 1 |
| 0.059 | 1 |
| 0.057 | 1 |
| 0.053 | 1 |
| 0.048 | 1 |
| 0.08  | 1 |
| 0.089 | 1 |
| 0.238 | 1 |
| 0.083 | 1 |
| 0.078 | 1 |
| 0.061 | 1 |
| 0.051 | 1 |
| 0.995 | 1 |
| 0.112 | 1 |
| 0.15  | 1 |
| 0.113 | 1 |
| 0.05  | 1 |
| 0.098 | 1 |
| 0.072 | 1 |
| 0.071 | 1 |
| 0.095 | 1 |
| 0.064 | 1 |

|       |   |
|-------|---|
| 0.092 | 1 |
| 0.048 | 1 |
| 0.065 | 1 |
| 0.054 | 1 |
| 0.098 | 1 |
| 0.062 | 1 |
| 0.07  | 1 |
| 0.084 | 1 |
| 0.07  | 1 |
| 0.135 | 1 |
| 0.049 | 1 |
| 0.062 | 1 |
| 0.05  | 1 |
| 0.052 | 1 |
| 0.07  | 1 |
| 0.101 | 1 |
| 0.482 | 1 |
| 0.08  | 1 |
| 0.051 | 1 |
| 0.084 | 1 |
| 0.069 | 1 |
| 0.219 | 1 |
| 0.065 | 1 |
| 0.089 | 1 |
| 0.066 | 1 |
| 0.073 | 1 |
| 0.054 | 1 |
| 0.138 | 1 |
| 0.05  | 1 |
| 0.093 | 1 |
| 0.053 | 1 |
| 0.113 | 1 |
| 0.056 | 1 |
| 0.068 | 1 |
| 0.061 | 1 |
| 0.09  | 1 |
| 0.063 | 1 |
| 0.061 | 1 |
| 0.131 | 1 |
| 0.071 | 1 |
| 0.141 | 1 |
| 0.131 | 1 |
| 0.086 | 1 |

|       |   |
|-------|---|
| 0.058 | 1 |
| 0.108 | 1 |
| 0.126 | 1 |
| 0.27  | 1 |
| 0.134 | 1 |
| 0.049 | 1 |
| 0.052 | 1 |
| 0.121 | 1 |
| 0.093 | 1 |
| 0.077 | 1 |
| 0.102 | 1 |
| 0.158 | 1 |
| 0.058 | 1 |
| 0.061 | 1 |
| 0.057 | 1 |
| 0.09  | 1 |
| 0.061 | 1 |
| 0.145 | 1 |
| 0.059 | 1 |
| 0.142 | 1 |
| 0.196 | 1 |
| 0.161 | 1 |
| 0.055 | 1 |
| 0.121 | 1 |
| 0.084 | 1 |
| 0.088 | 1 |
| 0.071 | 1 |
| 0.071 | 1 |
| 0.112 | 1 |
| 0.1   | 1 |
| 0.055 | 1 |
| 0.264 | 1 |
| 0.076 | 1 |
| 0.102 | 1 |
| 0.089 | 1 |
| 0.133 | 1 |
| 0.201 | 1 |
| 0.108 | 1 |
| 0.051 | 1 |
| 0.24  | 1 |
| 0.08  | 1 |
| 0.069 | 1 |
| 0.063 | 1 |

|       |   |
|-------|---|
| 0.1   | 1 |
| 0.298 | 1 |
| 0.113 | 1 |
| 0.084 | 1 |
| 0.061 | 1 |
| 0.051 | 1 |
| 0.203 | 1 |
| 0.067 | 1 |
| 0.111 | 1 |
| 0.693 | 1 |
| 0.067 | 1 |
| 0.067 | 1 |
| 0.068 | 1 |
| 0.052 | 1 |
| 0.048 | 1 |
| 0.07  | 1 |
| 0.066 | 1 |
| 0.065 | 1 |
| 0.074 | 1 |
| 0.053 | 1 |
| 0.075 | 1 |
| 0.084 | 1 |
| 0.072 | 1 |
| 0.051 | 1 |
| 0.246 | 1 |
| 0.196 | 1 |
| 0.098 | 1 |
| 0.148 | 1 |
| 0.118 | 1 |
| 0.109 | 1 |
| 0.06  | 1 |
| 0.054 | 1 |
| 0.072 | 1 |
| 0.228 | 1 |
| 0.069 | 1 |
| 0.119 | 1 |
| 0.056 | 1 |
| 0.048 | 1 |
| 0.056 | 1 |
| 0.07  | 1 |
| 0.126 | 1 |
| 0.055 | 1 |
| 0.125 | 1 |

|       |   |
|-------|---|
| 0.074 | 1 |
| 0.211 | 1 |
| 0.086 | 1 |
| 0.06  | 1 |
| 0.066 | 1 |
| 0.367 | 1 |
| 0.055 | 1 |
| 0.091 | 1 |
| 0.158 | 1 |
| 0.077 | 1 |
| 0.162 | 1 |
| 0.052 | 1 |
| 0.055 | 1 |
| 0.069 | 1 |
| 0.079 | 1 |
| 0.24  | 1 |
| 0.111 | 1 |
| 0.05  | 1 |
| 0.093 | 1 |
| 0.244 | 1 |
| 0.283 | 1 |
| 0.263 | 1 |
| 0.156 | 1 |
| 0.07  | 1 |
| 0.053 | 1 |
| 0.085 | 1 |
| 0.081 | 1 |
| 0.229 | 1 |
| 0.059 | 1 |
| 0.171 | 1 |
| 0.095 | 1 |
| 0.08  | 1 |
| 0.054 | 1 |
| 0.178 | 1 |
| 0.048 | 1 |
| 0.098 | 1 |
| 0.052 | 1 |
| 0.108 | 1 |
| 0.056 | 1 |
| 0.331 | 1 |
| 0.05  | 1 |
| 0.054 | 1 |
| 0.101 | 1 |



|       |   |
|-------|---|
| 0.154 | 1 |
| 0.068 | 1 |
| 0.06  | 1 |
| 0.064 | 1 |
| 0.055 | 1 |
| 0.09  | 1 |
| 0.095 | 1 |
| 0.214 | 1 |
| 0.272 | 1 |
| 0.078 | 1 |
| 0.086 | 1 |
| 0.057 | 1 |
| 0.073 | 1 |
| 0.093 | 1 |
| 0.061 | 1 |
| 0.163 | 1 |
| 0.066 | 1 |
| 0.1   | 1 |
| 0.054 | 1 |
| 0.14  | 1 |
| 0.069 | 1 |
| 0.087 | 1 |
| 0.116 | 1 |
| 0.164 | 1 |
| 0.075 | 1 |
| 0.812 | 1 |
| 0.087 | 1 |
| 0.061 | 1 |
| 0.124 | 1 |
| 0.055 | 1 |
| 0.057 | 1 |
| 0.095 | 1 |
| 0.08  | 1 |
| 0.186 | 1 |
| 0.065 | 1 |
| 0.158 | 1 |
| 0.211 | 1 |
| 0.088 | 1 |
| 0.107 | 1 |
| 0.094 | 1 |
| 0.266 | 1 |
| 0.131 | 1 |
| 0.068 | 1 |

|       |   |
|-------|---|
| 0.09  | 1 |
| 0.075 | 1 |
| 0.11  | 1 |
| 0.056 | 1 |
| 0.055 | 1 |
| 0.084 | 1 |
| 0.088 | 1 |
| 0.083 | 1 |
| 0.056 | 1 |
| 0.092 | 1 |
| 0.059 | 1 |
| 0.291 | 1 |
| 0.099 | 1 |
| 0.53  | 1 |
| 0.069 | 1 |
| 0.142 | 1 |
| 0.591 | 1 |
| 0.098 | 1 |
| 0.067 | 1 |
| 0.187 | 1 |
| 0.093 | 1 |
| 0.065 | 1 |
| 0.062 | 1 |
| 0.186 | 1 |
| 0.086 | 1 |
| 0.067 | 1 |
| 0.222 | 1 |
| 0.09  | 1 |
| 0.067 | 1 |
| 0.231 | 1 |
| 0.293 | 1 |
| 0.05  | 1 |
| 0.178 | 1 |
| 0.164 | 1 |
| 0.102 | 1 |
| 0.116 | 1 |
| 0.053 | 1 |
| 0.201 | 1 |
| 0.397 | 1 |
| 0.055 | 1 |
| 0.075 | 1 |
| 0.075 | 1 |
| 0.073 | 1 |

|       |   |
|-------|---|
| 0.229 | 1 |
| 0.22  | 1 |
| 0.103 | 1 |
| 0.182 | 1 |
| 0.057 | 1 |
| 0.102 | 1 |
| 0.167 | 1 |
| 0.061 | 1 |
| 0.298 | 1 |
| 0.051 | 1 |
| 0.057 | 1 |
| 0.08  | 1 |
| 0.154 | 1 |
| 0.159 | 1 |
| 0.205 | 1 |
| 0.144 | 1 |
| 0.075 | 1 |
| 0.372 | 1 |
| 0.119 | 1 |
| 0.059 | 1 |
| 0.085 | 1 |
| 0.063 | 1 |
| 0.192 | 1 |
| 0.183 | 1 |
| 0.116 | 1 |
| 0.053 | 1 |
| 0.104 | 1 |
| 0.058 | 1 |
| 0.052 | 1 |
| 0.158 | 1 |
| 0.142 | 1 |
| 0.06  | 1 |
| 0.159 | 1 |
| 0.564 | 1 |
| 0.28  | 1 |
| 0.076 | 1 |
| 0.094 | 1 |
| 0.093 | 1 |
| 0.058 | 1 |
| 0.069 | 1 |
| 0.221 | 1 |
| 0.189 | 1 |
| 0.172 | 1 |

|       |   |
|-------|---|
| 0.084 | 1 |
| 0.164 | 1 |
| 0.067 | 1 |
| 0.105 | 1 |
| 0.143 | 1 |
| 0.069 | 1 |
| 0.058 | 1 |
| 0.143 | 1 |
| 0.074 | 1 |
| 0.279 | 1 |
| 0.074 | 1 |
| 0.071 | 1 |
| 0.321 | 1 |
| 0.083 | 1 |
| 0.052 | 1 |
| 0.107 | 1 |
| 0.101 | 1 |
| 0.062 | 1 |
| 0.057 | 1 |
| 0.055 | 1 |
| 0.229 | 1 |
| 0.088 | 1 |
| 0.06  | 1 |
| 0.243 | 1 |
| 0.056 | 1 |

| Category         | Term                                                   | Count |
|------------------|--------------------------------------------------------|-------|
| GOTERM_CC_DIRECT | GO:0070062~extracellular exosome                       | 191   |
| GOTERM_CC_DIRECT | GO:0005783~endoplasmic reticulum                       | 96    |
| GOTERM_CC_DIRECT | GO:0016020~membrane                                    | 300   |
| GOTERM_CC_DIRECT | GO:0009986~cell surface                                | 59    |
| GOTERM_BP_DIRECT | GO:0007155~cell adhesion                               | 51    |
| GOTERM_CC_DIRECT | GO:0042470~melanosome                                  | 23    |
| GOTERM_CC_DIRECT | GO:0005578~proteinaceous extracellular matrix          | 38    |
| GOTERM_CC_DIRECT | GO:0005576~extracellular region                        | 104   |
| GOTERM_CC_DIRECT | GO:0005925~focal adhesion                              | 41    |
| GOTERM_BP_DIRECT | GO:0006629~lipid metabolic process                     | 45    |
| GOTERM_CC_DIRECT | GO:0005604~basement membrane                           | 18    |
| GOTERM_CC_DIRECT | GO:0031012~extracellular matrix                        | 31    |
| GOTERM_CC_DIRECT | GO:0005794~Golgi apparatus                             | 72    |
| GOTERM_CC_DIRECT | GO:0005615~extracellular space                         | 84    |
| GOTERM_MF_DIRECT | GO:0005102~receptor binding                            | 36    |
| GOTERM_MF_DIRECT | GO:0005178~integrin binding                            | 17    |
| GOTERM_BP_DIRECT | GO:0030198~extracellular matrix organization           | 18    |
| GOTERM_MF_DIRECT | GO:0050840~extracellular matrix binding                | 10    |
| KEGG_PATHWAY     | mmu01212:Fatty acid metabolism                         | 13    |
| KEGG_PATHWAY     | mmu01040:Biosynthesis of unsaturated fatty acids       | 10    |
| GOTERM_CC_DIRECT | GO:0045177~apical part of cell                         | 17    |
| GOTERM_CC_DIRECT | GO:0005911~cell-cell junction                          | 22    |
| GOTERM_CC_DIRECT | GO:0005764~lysosome                                    | 29    |
| GOTERM_CC_DIRECT | GO:0005737~cytoplasm                                   | 251   |
| GOTERM_CC_DIRECT | GO:0048471~perinuclear region of cytoplasm             | 45    |
| GOTERM_CC_DIRECT | GO:0042383~sarcolemma                                  | 16    |
| GOTERM_CC_DIRECT | GO:0005788~endoplasmic reticulum lumen                 | 15    |
| KEGG_PATHWAY     | mmu03320:PPAR signaling pathway                        | 14    |
| GOTERM_CC_DIRECT | GO:0005913~cell-cell adherens junction                 | 27    |
| GOTERM_BP_DIRECT | GO:0006636~unsaturated fatty acid biosynthetic process | 7     |
| GOTERM_MF_DIRECT | GO:0005515~protein binding                             | 166   |
| GOTERM_CC_DIRECT | GO:0005886~plasma membrane                             | 192   |
| GOTERM_MF_DIRECT | GO:0042802~identical protein binding                   | 41    |
| GOTERM_BP_DIRECT | GO:0030335~positive regulation of cell migration       | 21    |
| GOTERM_MF_DIRECT | GO:0016491~oxidoreductase activity                     | 40    |
| GOTERM_MF_DIRECT | GO:0042803~protein homodimerization activity           | 48    |
| GOTERM_BP_DIRECT | GO:0008360~regulation of cell shape                    | 17    |
| GOTERM_BP_DIRECT | GO:0007568~aging                                       | 19    |
| GOTERM_CC_DIRECT | GO:0030027~lamellipodium                               | 18    |
| GOTERM_CC_DIRECT | GO:0030670~phagocytic vesicle membrane                 | 10    |
| GOTERM_CC_DIRECT | GO:0031527~filopodium membrane                         | 7     |
| GOTERM_MF_DIRECT | GO:0003779~actin binding                               | 27    |

|                  |                                                           |    |
|------------------|-----------------------------------------------------------|----|
| GOTERM_BP_DIRECT | GO:0055114~oxidation-reduction process                    | 43 |
| GOTERM_CC_DIRECT | GO:0045121~membrane raft                                  | 23 |
| GOTERM_BP_DIRECT | GO:0008203~cholesterol metabolic process                  | 13 |
| GOTERM_CC_DIRECT | GO:0042995~cell projection                                | 43 |
| GOTERM_BP_DIRECT | GO:0006694~steroid biosynthetic process                   | 11 |
| GOTERM_BP_DIRECT | GO:0016477~cell migration                                 | 19 |
| GOTERM_BP_DIRECT | GO:0007160~cell-matrix adhesion                           | 12 |
| GOTERM_BP_DIRECT | GO:0001649~osteoblast differentiation                     | 14 |
| GOTERM_MF_DIRECT | GO:0008201~heparin binding                                | 16 |
| GOTERM_MF_DIRECT | GO:0050839~cell adhesion molecule binding                 | 11 |
| GOTERM_CC_DIRECT | GO:0030054~cell junction                                  | 42 |
| GOTERM_BP_DIRECT | GO:0008202~steroid metabolic process                      | 12 |
| KEGG_PATHWAY     | mmu05205:Proteoglycans in cancer                          | 20 |
| GOTERM_CC_DIRECT | GO:0043209~myelin sheath                                  | 18 |
| GOTERM_BP_DIRECT | GO:0042759~long-chain fatty acid biosynthetic process     | 5  |
| GOTERM_MF_DIRECT | GO:0005509~calcium ion binding                            | 40 |
| KEGG_PATHWAY     | mmu01130:Biosynthesis of antibiotics                      | 20 |
| GOTERM_CC_DIRECT | GO:0016324~apical plasma membrane                         | 24 |
| GOTERM_BP_DIRECT | GO:0008284~positive regulation of cell proliferation      | 34 |
| GOTERM_BP_DIRECT | GO:0010977~negative regulation of neuron projection       | 10 |
| GOTERM_BP_DIRECT | GO:0016126~sterol biosynthetic process                    | 7  |
| GOTERM_BP_DIRECT | GO:0008584~male gonad development                         | 13 |
| GOTERM_MF_DIRECT | GO:0030165~PDZ domain binding                             | 13 |
| GOTERM_CC_DIRECT | GO:0043235~receptor complex                               | 14 |
| KEGG_PATHWAY     | mmu04512:ECM-receptor interaction                         | 12 |
| KEGG_PATHWAY     | mmu00062:Fatty acid elongation                            | 7  |
| GOTERM_CC_DIRECT | GO:0043231~intracellular membrane-bounded organelle       | 41 |
| GOTERM_MF_DIRECT | GO:0004602~glutathione peroxidase activity                | 6  |
| GOTERM_BP_DIRECT | GO:0032060~bleb assembly                                  | 5  |
| GOTERM_BP_DIRECT | GO:0034613~cellular protein localization                  | 9  |
| GOTERM_BP_DIRECT | GO:0010811~positive regulation of cell-substrate adhesion | 8  |
| GOTERM_MF_DIRECT | GO:0001540~beta-amyloid binding                           | 7  |
| GOTERM_BP_DIRECT | GO:0001666~response to hypoxia                            | 17 |
| GOTERM_BP_DIRECT | GO:0006631~fatty acid metabolic process                   | 15 |
| GOTERM_BP_DIRECT | GO:0042493~response to drug                               | 24 |
| GOTERM_BP_DIRECT | GO:0009611~response to wounding                           | 9  |
| GOTERM_BP_DIRECT | GO:0006695~cholesterol biosynthetic process               | 7  |
| GOTERM_CC_DIRECT | GO:0005902~microvillus                                    | 10 |
| GOTERM_BP_DIRECT | GO:0006633~fatty acid biosynthetic process                | 10 |
| GOTERM_CC_DIRECT | GO:0000139~Golgi membrane                                 | 26 |
| GOTERM_CC_DIRECT | GO:0030175~filopodium                                     | 10 |
| GOTERM_BP_DIRECT | GO:0008152~metabolic process                              | 29 |
| GOTERM_CC_DIRECT | GO:0009897~external side of plasma membrane               | 22 |

|                  |                                                       |    |
|------------------|-------------------------------------------------------|----|
| GOTERM_CC_DIRECT | GO:0005770~late endosome                              | 13 |
| GOTERM_BP_DIRECT | GO:0048709~oligodendrocyte differentiation            | 7  |
| GOTERM_MF_DIRECT | GO:0051015~actin filament binding                     | 13 |
| GOTERM_CC_DIRECT | GO:1903561~extracellular vesicle                      | 8  |
| GOTERM_MF_DIRECT | GO:0016209~antioxidant activity                       | 6  |
| GOTERM_CC_DIRECT | GO:0005789~endoplasmic reticulum membrane             | 38 |
| GOTERM_MF_DIRECT | GO:0098641~cadherin binding involved in cell-cell adh | 20 |
| GOTERM_BP_DIRECT | GO:0016049~cell growth                                | 8  |
| GOTERM_BP_DIRECT | GO:0014070~response to organic cyclic compound        | 10 |
| GOTERM_CC_DIRECT | GO:0005768~endosome                                   | 31 |
| KEGG_PATHWAY     | mmu04142:Lysosome                                     | 13 |
| GOTERM_BP_DIRECT | GO:0021915~neural tube development                    | 8  |
| GOTERM_BP_DIRECT | GO:0007611~learning or memory                         | 8  |
| GOTERM_BP_DIRECT | GO:0045861~negative regulation of proteolysis         | 6  |
| GOTERM_BP_DIRECT | GO:0032355~response to estradiol                      | 11 |
| GOTERM_MF_DIRECT | GO:0003824~catalytic activity                         | 28 |
| GOTERM_BP_DIRECT | GO:0022011~myelination in peripheral nervous system   | 5  |
| GOTERM_CC_DIRECT | GO:0005802~trans-Golgi network                        | 14 |
| GOTERM_CC_DIRECT | GO:0045335~phagocytic vesicle                         | 7  |
| KEGG_PATHWAY     | mmu00330:Arginine and proline metabolism              | 8  |
| GOTERM_BP_DIRECT | GO:0034446~substrate adhesion-dependent cell sprea    | 7  |
| GOTERM_BP_DIRECT | GO:0043410~positive regulation of MAPK cascade        | 11 |
| GOTERM_MF_DIRECT | GO:0043394~proteoglycan binding                       | 4  |
| GOTERM_CC_DIRECT | GO:0005790~smooth endoplasmic reticulum               | 6  |
| GOTERM_MF_DIRECT | GO:0001968~fibronectin binding                        | 6  |
| GOTERM_BP_DIRECT | GO:0072657~protein localization to membrane           | 5  |
| GOTERM_CC_DIRECT | GO:0005829~cytosol                                    | 75 |
| GOTERM_BP_DIRECT | GO:0030307~positive regulation of cell growth         | 10 |
| GOTERM_BP_DIRECT | GO:0046686~response to cadmium ion                    | 6  |
| GOTERM_MF_DIRECT | GO:0042277~peptide binding                            | 10 |
| GOTERM_MF_DIRECT | GO:0005518~collagen binding                           | 8  |
| GOTERM_CC_DIRECT | GO:0005777~peroxisome                                 | 12 |
| KEGG_PATHWAY     | mmu05412:Arrhythmogenic right ventricular cardiomy    | 9  |
| GOTERM_CC_DIRECT | GO:0030176~integral component of endoplasmic retic    | 10 |
| GOTERM_MF_DIRECT | GO:0016787~hydrolase activity                         | 66 |
| KEGG_PATHWAY     | mmu04146:Peroxisome                                   | 10 |
| GOTERM_CC_DIRECT | GO:0001726~ruffle                                     | 10 |
| GOTERM_BP_DIRECT | GO:0002479~antigen processing and presentation of e   | 6  |
| GOTERM_BP_DIRECT | GO:0001937~negative regulation of endothelial cell pr | 6  |
| GOTERM_BP_DIRECT | GO:0098609~cell-cell adhesion                         | 15 |
| GOTERM_MF_DIRECT | GO:0004601~peroxidase activity                        | 6  |
| GOTERM_CC_DIRECT | GO:0031258~lamellipodium membrane                     | 5  |
| GOTERM_CC_DIRECT | GO:0043034~costamere                                  | 5  |

|                  |                                                       |    |
|------------------|-------------------------------------------------------|----|
| GOTERM_BP_DIRECT | GO:0022010~central nervous system myelination         | 4  |
| GOTERM_BP_DIRECT | GO:0007229~integrin-mediated signaling pathway        | 10 |
| GOTERM_MF_DIRECT | GO:0016853~isomerase activity                         | 11 |
| GOTERM_BP_DIRECT | GO:0042552~myelination                                | 8  |
| KEGG_PATHWAY     | mmu00480:Glutathione metabolism                       | 8  |
| GOTERM_CC_DIRECT | GO:0043025~neuronal cell body                         | 29 |
| GOTERM_BP_DIRECT | GO:0006979~response to oxidative stress               | 12 |
| GOTERM_BP_DIRECT | GO:0061077~chaperone-mediated protein folding         | 6  |
| GOTERM_BP_DIRECT | GO:0034447~very-low-density lipoprotein particle clea | 3  |
| GOTERM_BP_DIRECT | GO:0071305~cellular response to vitamin D             | 4  |
| GOTERM_BP_DIRECT | GO:0035414~negative regulation of catenin import int  | 4  |
| GOTERM_CC_DIRECT | GO:0031410~cytoplasmic vesicle                        | 33 |
| GOTERM_BP_DIRECT | GO:0071310~cellular response to organic substance     | 6  |
| GOTERM_CC_DIRECT | GO:0005856~cytoskeleton                               | 50 |
| GOTERM_BP_DIRECT | GO:0000302~response to reactive oxygen species        | 5  |
| GOTERM_CC_DIRECT | GO:0031982~vesicle                                    | 13 |
| GOTERM_BP_DIRECT | GO:0060291~long-term synaptic potentiation            | 7  |
| GOTERM_BP_DIRECT | GO:0006749~glutathione metabolic process              | 7  |
| GOTERM_CC_DIRECT | GO:0031528~microvillus membrane                       | 5  |
| GOTERM_CC_DIRECT | GO:0014704~intercalated disc                          | 7  |
| GOTERM_CC_DIRECT | GO:0005759~mitochondrial matrix                       | 14 |
| GOTERM_BP_DIRECT | GO:0048708~astrocyte differentiation                  | 4  |
| GOTERM_BP_DIRECT | GO:0048514~blood vessel morphogenesis                 | 6  |
| GOTERM_BP_DIRECT | GO:0042127~regulation of cell proliferation           | 16 |
| GOTERM_BP_DIRECT | GO:0071456~cellular response to hypoxia               | 10 |
| GOTERM_BP_DIRECT | GO:0030855~epithelial cell differentiation            | 8  |
| KEGG_PATHWAY     | mmu04510:Focal adhesion                               | 16 |
| GOTERM_MF_DIRECT | GO:0017166~vinculin binding                           | 4  |
| GOTERM_MF_DIRECT | GO:0044548~S100 protein binding                       | 4  |
| KEGG_PATHWAY     | mmu05100:Bacterial invasion of epithelial cells       | 9  |
| GOTERM_BP_DIRECT | GO:0060045~positive regulation of cardiac muscle cell | 5  |
| GOTERM_BP_DIRECT | GO:0045747~positive regulation of Notch signaling pat | 6  |
| GOTERM_BP_DIRECT | GO:0030154~cell differentiation                       | 38 |
| GOTERM_BP_DIRECT | GO:0006564~L-serine biosynthetic process              | 3  |
| GOTERM_BP_DIRECT | GO:0021762~substantia nigra development               | 6  |
| GOTERM_BP_DIRECT | GO:0001568~blood vessel development                   | 8  |
| GOTERM_MF_DIRECT | GO:0008233~peptidase activity                         | 27 |
| KEGG_PATHWAY     | mmu00071:Fatty acid degradation                       | 7  |
| GOTERM_MF_DIRECT | GO:0030881~beta-2-microglobulin binding               | 4  |
| GOTERM_BP_DIRECT | GO:0016525~negative regulation of angiogenesis        | 8  |
| GOTERM_BP_DIRECT | GO:0006641~triglyceride metabolic process             | 6  |
| GOTERM_BP_DIRECT | GO:0033197~response to vitamin E                      | 4  |
| GOTERM_BP_DIRECT | GO:0060317~cardiac epithelial to mesenchymal transiti | 4  |



|                  |                                                        |    |
|------------------|--------------------------------------------------------|----|
| GOTERM_BP_DIRECT | GO:0097150~neuronal stem cell population maintenar     | 5  |
| GOTERM_BP_DIRECT | GO:0014065~phosphatidylinositol 3-kinase signaling     | 5  |
| GOTERM_MF_DIRECT | GO:0017134~fibroblast growth factor binding            | 5  |
| KEGG_PATHWAY     | mmu00900:Terpenoid backbone biosynthesis               | 5  |
| GOTERM_CC_DIRECT | GO:0030424~axon                                        | 21 |
| GOTERM_BP_DIRECT | GO:0051289~protein homotetramerization                 | 8  |
| GOTERM_CC_DIRECT | GO:0016323~basolateral plasma membrane                 | 14 |
| GOTERM_BP_DIRECT | GO:0001954~positive regulation of cell-matrix adhesio  | 5  |
| GOTERM_BP_DIRECT | GO:0050919~negative chemotaxis                         | 5  |
| GOTERM_CC_DIRECT | GO:0005739~mitochondrion                               | 69 |
| GOTERM_BP_DIRECT | GO:0051384~response to glucocorticoid                  | 8  |
| GOTERM_BP_DIRECT | GO:0008037~cell recognition                            | 4  |
| GOTERM_BP_DIRECT | GO:0003214~cardiac left ventricle morphogenesis        | 4  |
| GOTERM_BP_DIRECT | GO:0006656~phosphatidylcholine biosynthetic proces     | 4  |
| GOTERM_BP_DIRECT | GO:0048715~negative regulation of oligodendrocyte d    | 4  |
| GOTERM_BP_DIRECT | GO:0042744~hydrogen peroxide catabolic process         | 4  |
| GOTERM_BP_DIRECT | GO:0043066~negative regulation of apoptotic process    | 29 |
| GOTERM_MF_DIRECT | GO:0016717~oxidoreductase activity, acting on paired   | 3  |
| GOTERM_BP_DIRECT | GO:0035987~endodermal cell differentiation             | 5  |
| KEGG_PATHWAY     | mmu04514:Cell adhesion molecules (CAMs)                | 13 |
| GOTERM_BP_DIRECT | GO:0090272~negative regulation of fibroblast growth    | 3  |
| GOTERM_CC_DIRECT | GO:0031225~anchored component of membrane              | 11 |
| GOTERM_BP_DIRECT | GO:0090002~establishment of protein localization to p  | 6  |
| GOTERM_BP_DIRECT | GO:0033627~cell adhesion mediated by integrin          | 4  |
| GOTERM_BP_DIRECT | GO:0007263~nitric oxide mediated signal transduction   | 4  |
| GOTERM_BP_DIRECT | GO:0031175~neuron projection development               | 11 |
| GOTERM_CC_DIRECT | GO:0010008~endosome membrane                           | 10 |
| GOTERM_CC_DIRECT | GO:0005938~cell cortex                                 | 11 |
| GOTERM_CC_DIRECT | GO:0042612~MHC class I protein complex                 | 4  |
| GOTERM_BP_DIRECT | GO:0031103~axon regeneration                           | 4  |
| GOTERM_MF_DIRECT | GO:0038132~neuregulin binding                          | 3  |
| GOTERM_MF_DIRECT | GO:0004768~stearoyl-CoA 9-desaturase activity          | 3  |
| GOTERM_BP_DIRECT | GO:0090090~negative regulation of canonical Wnt sigr   | 9  |
| GOTERM_CC_DIRECT | GO:0005797~Golgi medial cisterna                       | 4  |
| GOTERM_BP_DIRECT | GO:0003150~muscular septum morphogenesis               | 3  |
| GOTERM_BP_DIRECT | GO:0045860~positive regulation of protein kinase acti  | 7  |
| GOTERM_CC_DIRECT | GO:0043005~neuron projection                           | 22 |
| GOTERM_MF_DIRECT | GO:0004872~receptor activity                           | 12 |
| GOTERM_BP_DIRECT | GO:0050678~regulation of epithelial cell proliferation | 4  |
| GOTERM_CC_DIRECT | GO:0001725~stress fiber                                | 7  |
| GOTERM_CC_DIRECT | GO:0002102~podosome                                    | 5  |
| GOTERM_BP_DIRECT | GO:0045454~cell redox homeostasis                      | 7  |
| GOTERM_BP_DIRECT | GO:0001525~angiogenesis                                | 15 |

|                  |                                                        |    |
|------------------|--------------------------------------------------------|----|
| KEGG_PATHWAY     | mmu04919:Thyroid hormone signaling pathway             | 10 |
| GOTERM_BP_DIRECT | GO:0006813~potassium ion transport                     | 10 |
| GOTERM_MF_DIRECT | GO:0004364~glutathione transferase activity            | 5  |
| GOTERM_BP_DIRECT | GO:0090263~positive regulation of canonical Wnt sign   | 7  |
| GOTERM_CC_DIRECT | GO:0015629~actin cytoskeleton                          | 13 |
| GOTERM_BP_DIRECT | GO:0001755~neural crest cell migration                 | 6  |
| GOTERM_BP_DIRECT | GO:0050910~detection of mechanical stimulus involve    | 4  |
| GOTERM_BP_DIRECT | GO:0001676~long-chain fatty acid metabolic process     | 4  |
| GOTERM_MF_DIRECT | GO:0102337~3-oxo-cerotoyl-CoA synthase activity        | 3  |
| GOTERM_MF_DIRECT | GO:0009922~fatty acid elongase activity                | 3  |
| GOTERM_MF_DIRECT | GO:0102336~3-oxo-arachidoyl-CoA synthase activity      | 3  |
| GOTERM_MF_DIRECT | GO:0102338~3-oxo-lignoceronyl-CoA synthase activity    | 3  |
| GOTERM_CC_DIRECT | GO:0005605~basal lamina                                | 4  |
| GOTERM_CC_DIRECT | GO:0043292~contractile fiber                           | 4  |
| GOTERM_BP_DIRECT | GO:0060396~growth hormone receptor signaling path      | 3  |
| GOTERM_BP_DIRECT | GO:0034625~fatty acid elongation, monounsaturated      | 3  |
| GOTERM_BP_DIRECT | GO:0034626~fatty acid elongation, polyunsaturated fa   | 3  |
| GOTERM_BP_DIRECT | GO:0019367~fatty acid elongation, saturated fatty acid | 3  |
| GOTERM_BP_DIRECT | GO:0045607~regulation of auditory receptor cell differ | 3  |
| GOTERM_BP_DIRECT | GO:0032869~cellular response to insulin stimulus       | 8  |
| GOTERM_CC_DIRECT | GO:0071944~cell periphery                              | 7  |
| KEGG_PATHWAY     | mmu01100:Metabolic pathways                            | 57 |
| GOTERM_MF_DIRECT | GO:0000062~fatty-acyl-CoA binding                      | 5  |
| GOTERM_BP_DIRECT | GO:0010718~positive regulation of epithelial to meser  | 5  |
| GOTERM_CC_DIRECT | GO:0005778~peroxisomal membrane                        | 6  |
| GOTERM_BP_DIRECT | GO:0006869~lipid transport                             | 9  |
| GOTERM_MF_DIRECT | GO:0032403~protein complex binding                     | 19 |
| GOTERM_BP_DIRECT | GO:0007157~heterophilic cell-cell adhesion via plasma  | 6  |
| GOTERM_BP_DIRECT | GO:0007224~smoothened signaling pathway                | 7  |
| GOTERM_CC_DIRECT | GO:0031090~organelle membrane                          | 8  |
| GOTERM_MF_DIRECT | GO:0017048~Rho GTPase binding                          | 5  |
| GOTERM_CC_DIRECT | GO:0005765~lysosomal membrane                          | 14 |
| GOTERM_MF_DIRECT | GO:0046977~TAP binding                                 | 3  |
| GOTERM_MF_DIRECT | GO:0038191~neuropilin binding                          | 3  |
| GOTERM_MF_DIRECT | GO:1990459~transferrin receptor binding                | 3  |
| GOTERM_BP_DIRECT | GO:0030318~melanocyte differentiation                  | 4  |
| GOTERM_BP_DIRECT | GO:0007399~nervous system development                  | 20 |
| GOTERM_MF_DIRECT | GO:0002020~protease binding                            | 9  |
| GOTERM_CC_DIRECT | GO:0005912~adherens junction                           | 6  |
| GOTERM_MF_DIRECT | GO:0051287~NAD binding                                 | 6  |
| GOTERM_MF_DIRECT | GO:0005539~glycosaminoglycan binding                   | 4  |
| GOTERM_BP_DIRECT | GO:0045542~positive regulation of cholesterol biosynt  | 3  |
| GOTERM_BP_DIRECT | GO:0002474~antigen processing and presentation of p    | 5  |

|                  |                                                                                         |    |
|------------------|-----------------------------------------------------------------------------------------|----|
| GOTERM_BP_DIRECT | GO:0019882~antigen processing and presentation                                          | 6  |
| GOTERM_BP_DIRECT | GO:0030512~negative regulation of transforming growth factor receptor signaling pathway | 6  |
| GOTERM_BP_DIRECT | GO:0031641~regulation of myelination                                                    | 4  |
| GOTERM_BP_DIRECT | GO:0010001~glial cell differentiation                                                   | 4  |
| GOTERM_BP_DIRECT | GO:0043627~response to estrogen                                                         | 7  |
| GOTERM_MF_DIRECT | GO:0050661~NADP binding                                                                 | 5  |
| GOTERM_BP_DIRECT | GO:0060348~bone development                                                             | 6  |
| GOTERM_MF_DIRECT | GO:0016500~protein-hormone receptor activity                                            | 3  |
| GOTERM_BP_DIRECT | GO:0060412~ventricular septum morphogenesis                                             | 5  |
| GOTERM_BP_DIRECT | GO:0045665~negative regulation of neuron differentiation                                | 7  |
| GOTERM_BP_DIRECT | GO:0035924~cellular response to vascular endothelial growth factor                      | 4  |
| KEGG_PATHWAY     | mmu04810:Regulation of actin cytoskeleton                                               | 14 |
| GOTERM_BP_DIRECT | GO:0007264~small GTPase mediated signal transduction                                    | 14 |
| GOTERM_CC_DIRECT | GO:0032587~ruffle membrane                                                              | 7  |
| GOTERM_BP_DIRECT | GO:0061032~visceral serous pericardium development                                      | 3  |
| GOTERM_BP_DIRECT | GO:0043297~apical junction assembly                                                     | 3  |
| GOTERM_BP_DIRECT | GO:0007507~heart development                                                            | 15 |
| KEGG_PATHWAY     | mmu04974:Protein digestion and absorption                                               | 8  |
| GOTERM_MF_DIRECT | GO:0016747~transferase activity, transferring acyl groups                               | 4  |
| GOTERM_BP_DIRECT | GO:0051603~proteolysis involved in cellular protein catabolism                          | 6  |
| KEGG_PATHWAY     | mmu04151:PI3K-Akt signaling pathway                                                     | 20 |
| GOTERM_MF_DIRECT | GO:0004197~cysteine-type endopeptidase activity                                         | 6  |
| GOTERM_BP_DIRECT | GO:0016055~Wnt signaling pathway                                                        | 13 |
| KEGG_PATHWAY     | mmu04918:Thyroid hormone synthesis                                                      | 7  |
| GOTERM_CC_DIRECT | GO:0044297~cell body                                                                    | 8  |
| GOTERM_BP_DIRECT | GO:0010243~response to organonitrogen compound                                          | 4  |
| GOTERM_BP_DIRECT | GO:0048041~focal adhesion assembly                                                      | 4  |
| GOTERM_MF_DIRECT | GO:0005201~extracellular matrix structural constituent                                  | 5  |
| GOTERM_BP_DIRECT | GO:0031623~receptor internalization                                                     | 5  |
| GOTERM_BP_DIRECT | GO:0001654~eye development                                                              | 5  |
| GOTERM_BP_DIRECT | GO:0006508~proteolysis                                                                  | 27 |
| GOTERM_CC_DIRECT | GO:0005890~sodium:potassium-exchanging ATPase cycle                                     | 3  |
| GOTERM_MF_DIRECT | GO:0051920~peroxiredoxin activity                                                       | 3  |
| GOTERM_CC_DIRECT | GO:0016023~cytoplasmic, membrane-bounded vesicle                                        | 10 |
| GOTERM_BP_DIRECT | GO:0035458~cellular response to interferon-beta                                         | 5  |
| GOTERM_BP_DIRECT | GO:0035646~endosome to melanosome transport                                             | 3  |
| GOTERM_BP_DIRECT | GO:0060055~angiogenesis involved in wound healing                                       | 3  |
| GOTERM_BP_DIRECT | GO:0014044~Schwann cell development                                                     | 3  |
| GOTERM_BP_DIRECT | GO:0010269~response to selenium ion                                                     | 3  |
| GOTERM_BP_DIRECT | GO:0009267~cellular response to starvation                                              | 6  |
| GOTERM_BP_DIRECT | GO:0007566~embryo implantation                                                          | 6  |
| GOTERM_BP_DIRECT | GO:0001764~neuron migration                                                             | 9  |
| KEGG_PATHWAY     | mmu00280:Valine, leucine and isoleucine degradation                                     | 6  |

|                  |                                                       |     |
|------------------|-------------------------------------------------------|-----|
| GOTERM_MF_DIRECT | GO:0008013~beta-catenin binding                       | 7   |
| GOTERM_BP_DIRECT | GO:0000122~negative regulation of transcription from  | 32  |
| GOTERM_BP_DIRECT | GO:0032496~response to lipopolysaccharide             | 12  |
| GOTERM_BP_DIRECT | GO:0043001~Golgi to plasma membrane protein trans     | 4   |
| GOTERM_MF_DIRECT | GO:0043236~laminin binding                            | 4   |
| GOTERM_BP_DIRECT | GO:0006457~protein folding                            | 9   |
| GOTERM_BP_DIRECT | GO:0003184~pulmonary valve morphogenesis              | 3   |
| GOTERM_BP_DIRECT | GO:0048103~somatic stem cell division                 | 3   |
| GOTERM_BP_DIRECT | GO:0008347~glial cell migration                       | 3   |
| KEGG_PATHWAY     | mmu01200:Carbon metabolism                            | 9   |
| GOTERM_BP_DIRECT | GO:0045662~negative regulation of myoblast differenti | 4   |
| GOTERM_BP_DIRECT | GO:0010107~potassium ion import                       | 4   |
| GOTERM_BP_DIRECT | GO:0006810~transport                                  | 69  |
| GOTERM_MF_DIRECT | GO:0045499~chemorepellent activity                    | 4   |
| KEGG_PATHWAY     | mmu05146:Amoebiasis                                   | 9   |
| GOTERM_CC_DIRECT | GO:0016021~integral component of membrane             | 223 |
| GOTERM_CC_DIRECT | GO:0005811~lipid particle                             | 6   |
| KEGG_PATHWAY     | mmu00260:Glycine, serine and threonine metabolism     | 5   |
| GOTERM_CC_DIRECT | GO:0031902~late endosome membrane                     | 7   |
| GOTERM_MF_DIRECT | GO:0051117~ATPase binding                             | 7   |
| GOTERM_CC_DIRECT | GO:0030426~growth cone                                | 10  |
| KEGG_PATHWAY     | mmu04670:Leukocyte transendothelial migration         | 9   |
| GOTERM_BP_DIRECT | GO:0009636~response to toxic substance                | 7   |
| GOTERM_CC_DIRECT | GO:0034663~endoplasmic reticulum chaperone compl      | 3   |
| GOTERM_CC_DIRECT | GO:0044853~plasma membrane raft                       | 3   |
| GOTERM_CC_DIRECT | GO:0033162~melanosome membrane                        | 3   |
| GOTERM_MF_DIRECT | GO:0031994~insulin-like growth factor I binding       | 3   |
| GOTERM_BP_DIRECT | GO:0051781~positive regulation of cell division       | 5   |
| GOTERM_BP_DIRECT | GO:0007173~epidermal growth factor receptor signalin  | 5   |
| GOTERM_MF_DIRECT | GO:0008134~transcription factor binding               | 17  |
| GOTERM_BP_DIRECT | GO:0070830~bicellular tight junction assembly         | 4   |
| GOTERM_CC_DIRECT | GO:0005887~integral component of plasma membran       | 44  |
| GOTERM_BP_DIRECT | GO:0033327~Leydig cell differentiation                | 3   |
| GOTERM_BP_DIRECT | GO:0043950~positive regulation of cAMP-mediated sig   | 3   |
| GOTERM_BP_DIRECT | GO:0060740~prostate gland epithelium morphogenesi     | 3   |
| GOTERM_BP_DIRECT | GO:0042761~very long-chain fatty acid biosynthetic pr | 3   |
| GOTERM_BP_DIRECT | GO:0070373~negative regulation of ERK1 and ERK2 ca    | 6   |
| GOTERM_BP_DIRECT | GO:0032880~regulation of protein localization         | 6   |
| GOTERM_MF_DIRECT | GO:0008092~cytoskeletal protein binding               | 6   |
| GOTERM_BP_DIRECT | GO:0071356~cellular response to tumor necrosis facto  | 8   |
| GOTERM_BP_DIRECT | GO:0030514~negative regulation of BMP signaling pat   | 5   |
| KEGG_PATHWAY     | mmu05410:Hypertrophic cardiomyopathy (HCM)            | 7   |
| GOTERM_CC_DIRECT | GO:0014069~postsynaptic density                       | 13  |

|                  |                                                                               |    |
|------------------|-------------------------------------------------------------------------------|----|
| GOTERM_CC_DIRECT | GO:0012505~endomembrane system                                                | 8  |
| GOTERM_BP_DIRECT | GO:0050770~regulation of axonogenesis                                         | 4  |
| GOTERM_CC_DIRECT | GO:0005916~fascia adherens                                                    | 3  |
| GOTERM_CC_DIRECT | GO:0016010~dystrophin-associated glycoprotein complex                         | 3  |
| GOTERM_MF_DIRECT | GO:0005319~lipid transporter activity                                         | 3  |
| GOTERM_MF_DIRECT | GO:0004303~estradiol 17-beta-dehydrogenase activity                           | 3  |
| GOTERM_CC_DIRECT | GO:0030425~dendrite                                                           | 22 |
| GOTERM_BP_DIRECT | GO:0001570~vasculogenesis                                                     | 6  |
| GOTERM_BP_DIRECT | GO:0043524~negative regulation of neuron apoptotic process                    | 10 |
| GOTERM_BP_DIRECT | GO:0097421~liver regeneration                                                 | 4  |
| GOTERM_BP_DIRECT | GO:0002040~sprouting angiogenesis                                             | 4  |
| GOTERM_BP_DIRECT | GO:0009725~response to hormone                                                | 5  |
| GOTERM_BP_DIRECT | GO:0045599~negative regulation of fat cell differentiation                    | 5  |
| GOTERM_MF_DIRECT | GO:0017147~Wnt-protein binding                                                | 4  |
| GOTERM_BP_DIRECT | GO:0046889~positive regulation of lipid biosynthetic process                  | 3  |
| GOTERM_BP_DIRECT | GO:0043537~negative regulation of blood vessel endothelial cell morphogenesis | 3  |
| GOTERM_BP_DIRECT | GO:0003215~cardiac right ventricle morphogenesis                              | 3  |
| GOTERM_BP_DIRECT | GO:0090179~planar cell polarity pathway involved in r                         | 3  |
| GOTERM_CC_DIRECT | GO:0034683~integrin alphav-beta3 complex                                      | 2  |
| GOTERM_CC_DIRECT | GO:0034686~integrin alphav-beta8 complex                                      | 2  |
| GOTERM_MF_DIRECT | GO:0036461~BLOC-2 complex binding                                             | 2  |
| GOTERM_MF_DIRECT | GO:0004421~hydroxymethylglutaryl-CoA synthase activity                        | 2  |
| GOTERM_BP_DIRECT | GO:1904437~positive regulation of transferrin receptor signaling pathway      | 2  |
| GOTERM_BP_DIRECT | GO:1903991~positive regulation of ferrous iron import                         | 2  |
| GOTERM_BP_DIRECT | GO:0050748~negative regulation of lipoprotein metabolism                      | 2  |
| GOTERM_BP_DIRECT | GO:0097324~melanocyte migration                                               | 2  |
| GOTERM_BP_DIRECT | GO:1904434~positive regulation of ferrous iron binding                        | 2  |
| GOTERM_BP_DIRECT | GO:0031509~telomeric heterochromatin assembly                                 | 2  |
| GOTERM_BP_DIRECT | GO:1902340~negative regulation of chromosome condensation                     | 2  |
| GOTERM_BP_DIRECT | GO:0090230~regulation of centromere complex assembly                          | 2  |
| GOTERM_BP_DIRECT | GO:0060857~establishment of glial blood-brain barrier                         | 2  |
| GOTERM_BP_DIRECT | GO:0006601~creatine biosynthetic process                                      | 2  |
| GOTERM_BP_DIRECT | GO:1903334~positive regulation of protein folding                             | 2  |
| KEGG_PATHWAY     | mmu05414:Dilated cardiomyopathy                                               | 7  |
| GOTERM_BP_DIRECT | GO:0090004~positive regulation of establishment of p                          | 4  |
| GOTERM_BP_DIRECT | GO:0044344~cellular response to fibroblast growth factor                      | 4  |
| GOTERM_BP_DIRECT | GO:0032570~response to progesterone                                           | 4  |
| GOTERM_BP_DIRECT | GO:0010628~positive regulation of gene expression                             | 19 |
| GOTERM_MF_DIRECT | GO:0042608~T cell receptor binding                                            | 3  |
| GOTERM_MF_DIRECT | GO:0030971~receptor tyrosine kinase binding                                   | 5  |
| KEGG_PATHWAY     | mmu05222:Small cell lung cancer                                               | 7  |
| GOTERM_CC_DIRECT | GO:0045211~postsynaptic membrane                                              | 12 |
| GOTERM_BP_DIRECT | GO:0071320~cellular response to cAMP                                          | 5  |



|                  |                                                         |    |
|------------------|---------------------------------------------------------|----|
| GOTERM_BP_DIRECT | GO:0045471~response to ethanol                          | 8  |
| GOTERM_BP_DIRECT | GO:0001886~endothelial cell morphogenesis               | 3  |
| GOTERM_BP_DIRECT | GO:0032438~melanosome organization                      | 3  |
| GOTERM_BP_DIRECT | GO:2000811~negative regulation of anoikis               | 3  |
| GOTERM_BP_DIRECT | GO:0060979~vasculogenesis involved in coronary vasc     | 3  |
| GOTERM_BP_DIRECT | GO:0045055~regulated exocytosis                         | 3  |
| GOTERM_BP_DIRECT | GO:0007420~brain development                            | 12 |
| GOTERM_MF_DIRECT | GO:0016616~oxidoreductase activity, acting on the CH    | 4  |
| GOTERM_BP_DIRECT | GO:0050680~negative regulation of epithelial cell proli | 6  |
| GOTERM_BP_DIRECT | GO:0006914~autophagy                                    | 9  |
| GOTERM_BP_DIRECT | GO:0051591~response to cAMP                             | 5  |
| GOTERM_BP_DIRECT | GO:0008286~insulin receptor signaling pathway           | 5  |
| GOTERM_BP_DIRECT | GO:0001889~liver development                            | 7  |
| GOTERM_BP_DIRECT | GO:0006469~negative regulation of protein kinase acti   | 7  |
| KEGG_PATHWAY     | mmu00790:Folate biosynthesis                            | 3  |
| GOTERM_CC_DIRECT | GO:0032433~filopodium tip                               | 3  |
| GOTERM_MF_DIRECT | GO:0043295~glutathione binding                          | 3  |
| GOTERM_CC_DIRECT | GO:0045202~synapse                                      | 22 |
| GOTERM_BP_DIRECT | GO:0021766~hippocampus development                      | 6  |
| KEGG_PATHWAY     | mmu00982:Drug metabolism - cytochrome P450              | 6  |
| GOTERM_BP_DIRECT | GO:0048678~response to axon injury                      | 4  |
| GOTERM_BP_DIRECT | GO:0030032~lamellipodium assembly                       | 4  |
| GOTERM_BP_DIRECT | GO:2001238~positive regulation of extrinsic apoptotic   | 4  |
| GOTERM_MF_DIRECT | GO:0042169~SH2 domain binding                           | 4  |
| GOTERM_BP_DIRECT | GO:0001942~hair follicle development                    | 5  |
| GOTERM_BP_DIRECT | GO:0050673~epithelial cell proliferation                | 3  |
| GOTERM_BP_DIRECT | GO:0033630~positive regulation of cell adhesion medi    | 3  |
| GOTERM_BP_DIRECT | GO:0010812~negative regulation of cell-substrate adhe   | 3  |
| GOTERM_BP_DIRECT | GO:0051044~positive regulation of membrane protein      | 3  |
| GOTERM_BP_DIRECT | GO:0042391~regulation of membrane potential             | 7  |
| GOTERM_CC_DIRECT | GO:0043204~perikaryon                                   | 9  |
| GOTERM_BP_DIRECT | GO:0007179~transforming growth factor beta recepto      | 6  |
| GOTERM_MF_DIRECT | GO:0015485~cholesterol binding                          | 4  |
| GOTERM_MF_DIRECT | GO:0015026~coreceptor activity                          | 3  |
| GOTERM_BP_DIRECT | GO:0003151~outflow tract morphogenesis                  | 5  |
| GOTERM_BP_DIRECT | GO:0034976~response to endoplasmic reticulum stres      | 6  |
| GOTERM_BP_DIRECT | GO:0006811~ion transport                                | 25 |
| GOTERM_MF_DIRECT | GO:0003707~steroid hormone receptor activity            | 5  |
| GOTERM_MF_DIRECT | GO:0046982~protein heterodimerization activity          | 22 |
| GOTERM_MF_DIRECT | GO:0005158~insulin receptor binding                     | 4  |
| GOTERM_BP_DIRECT | GO:0050873~brown fat cell differentiation               | 4  |
| GOTERM_BP_DIRECT | GO:0000038~very long-chain fatty acid metabolic proc    | 3  |
| GOTERM_BP_DIRECT | GO:0034314~Arp2/3 complex-mediated actin nucleati       | 3  |

|                  |                                                                             |    |
|------------------|-----------------------------------------------------------------------------|----|
| GOTERM_BP_DIRECT | GO:0010288~response to lead ion                                             | 3  |
| GOTERM_BP_DIRECT | GO:2000406~positive regulation of T cell migration                          | 3  |
| GOTERM_BP_DIRECT | GO:0001953~negative regulation of cell-matrix adhesion                      | 3  |
| GOTERM_BP_DIRECT | GO:0043123~positive regulation of I-kappaB kinase/NF-kappaB                 | 9  |
| GOTERM_BP_DIRECT | GO:0007411~axon guidance                                                    | 9  |
| GOTERM_MF_DIRECT | GO:0035651~AP-3 adaptor complex binding                                     | 2  |
| GOTERM_MF_DIRECT | GO:0035650~AP-1 adaptor complex binding                                     | 2  |
| GOTERM_MF_DIRECT | GO:0019153~protein-disulfide reductase (glutathione)                        | 2  |
| GOTERM_MF_DIRECT | GO:0036042~long-chain fatty acyl-CoA binding                                | 2  |
| GOTERM_CC_DIRECT | GO:0030315~T-tubule                                                         | 5  |
| GOTERM_MF_DIRECT | GO:0004860~protein kinase inhibitor activity                                | 5  |
| GOTERM_MF_DIRECT | GO:0005267~potassium channel activity                                       | 6  |
| GOTERM_CC_DIRECT | GO:0005614~interstitial matrix                                              | 3  |
| GOTERM_CC_DIRECT | GO:0005782~peroxisomal matrix                                               | 3  |
| GOTERM_BP_DIRECT | GO:0006082~organic acid metabolic process                                   | 2  |
| GOTERM_BP_DIRECT | GO:2000974~negative regulation of pro-B cell differentiation                | 2  |
| GOTERM_BP_DIRECT | GO:2000041~negative regulation of planar cell polarity                      | 2  |
| GOTERM_BP_DIRECT | GO:0019254~carnitine metabolic process, CoA-linked                          | 2  |
| GOTERM_BP_DIRECT | GO:0072282~metanephric nephron tubule morphogenesis                         | 2  |
| GOTERM_BP_DIRECT | GO:0006663~platelet activating factor biosynthetic process                  | 2  |
| GOTERM_BP_DIRECT | GO:2001212~regulation of vasculogenesis                                     | 2  |
| GOTERM_BP_DIRECT | GO:0036151~phosphatidylcholine acyl-chain remodeling                        | 2  |
| GOTERM_BP_DIRECT | GO:0045715~negative regulation of low-density lipoprotein receptor activity | 2  |
| GOTERM_BP_DIRECT | GO:0003347~epicardial cell to mesenchymal cell transition                   | 2  |
| GOTERM_BP_DIRECT | GO:0006598~polyamine catabolic process                                      | 2  |
| GOTERM_BP_DIRECT | GO:0060326~cell chemotaxis                                                  | 6  |
| GOTERM_BP_DIRECT | GO:0031069~hair follicle morphogenesis                                      | 4  |
| GOTERM_BP_DIRECT | GO:0030178~negative regulation of Wnt signaling pathway                     | 5  |
| GOTERM_BP_DIRECT | GO:0045668~negative regulation of osteoblast differentiation                | 5  |
| GOTERM_MF_DIRECT | GO:0005516~calmodulin binding                                               | 10 |
| GOTERM_BP_DIRECT | GO:0045444~fat cell differentiation                                         | 6  |
| GOTERM_BP_DIRECT | GO:0030182~neuron differentiation                                           | 8  |
| GOTERM_BP_DIRECT | GO:0042692~muscle cell differentiation                                      | 3  |
| GOTERM_BP_DIRECT | GO:0014002~astrocyte development                                            | 3  |
| GOTERM_BP_DIRECT | GO:0061136~regulation of proteasomal protein catabolic process              | 3  |
| GOTERM_BP_DIRECT | GO:0003222~ventricular trabecula myocardium morphogenesis                   | 3  |
| GOTERM_BP_DIRECT | GO:0060038~cardiac muscle cell proliferation                                | 3  |
| GOTERM_BP_DIRECT | GO:0008299~isoprenoid biosynthetic process                                  | 3  |
| GOTERM_BP_DIRECT | GO:0048712~negative regulation of astrocyte differentiation                 | 3  |
| GOTERM_BP_DIRECT | GO:0019369~arachidonic acid metabolic process                               | 4  |
| GOTERM_BP_DIRECT | GO:0048754~branching morphogenesis of an epithelium                         | 4  |
| KEGG_PATHWAY     | mmu04971:Gastric acid secretion                                             | 6  |
| GOTERM_BP_DIRECT | GO:0060548~negative regulation of cell death                                | 6  |

|                  |                          |   |
|------------------|--------------------------|---|
| GOTERM_MF_DIRECT | GO:0005528~FK506 binding | 3 |
| KEGG_PATHWAY     | mmu05020:Prion diseases  | 4 |



| PValue   | Genes                                    | Fold Enrichment | Bonferroni |
|----------|------------------------------------------|-----------------|------------|
| 1.12E-33 | IFITM3, CYFIP1, ACAA2, CD81, ECI1, H2-K  | 2.42561066      | 4.92E-31   |
| 3.08E-16 | RAB9, IFITM3, FKBP10, SLC27A1, CPQ, H2   | 2.46411242      | 1.46E-13   |
| 6.41E-16 | IFITM3, CNTFR, SLC35B2, SERPINE2, PLEK   | 1.45578233      | 2.92E-13   |
| 1.12E-14 | IFITM3, CLIC4, SPARC, ITGB3, H2-K1, PEB  | 3.18530112      | 4.92E-12   |
| 3.71E-14 | COL16A1, MEGF10, COL14A1, ITGB3, CTN     | 3.45710216      | 1.01E-10   |
| 1.45E-13 | PDIA3, RAB9, CD63, TMED10, CNP, ITGB3    | 7.73313497      | 6.38E-11   |
| 8.28E-13 | OLFML2B, SPARC, COL16A1, COL14A1, LA     | 4.08362301      | 3.63E-10   |
| 5.79E-12 | COL16A1, OLFML2B, SPARC, SERPINE2, TI    | 2.01465437      | 2.54E-09   |
| 7.45E-12 | CYFIP1, AHNAK, SDC4, CD81, ARPC1B, ITC   | 3.56087089      | 3.27E-09   |
| 1.60E-11 | SLC27A1, GAL3ST1, ACAA2, ABHD4, ECI1,    | 3.22317291      | 4.35E-08   |
| 3.09E-09 | COL28A1, TGFB2, SPARC, LAMA4, TNC, LA    | 6.30158645      | 1.36E-06   |
| 3.48E-09 | SERPINE2, COL14A1, COL11A1, HTRA1, TI    | 3.58066335      | 1.53E-06   |
| 9.60E-09 | RAB9, SLC35B2, GAL3ST1, SYS1, CPQ, H2-   | 2.05463491      | 4.21E-06   |
| 1.70E-08 | SPARC, SERPINE2, COL14A1, CPQ, HFE, TI   | 1.8966211       | 7.48E-06   |
| 2.11E-08 | CNTFR, SERPINE2, LAMA4, HFE, ECI2, H2-   | 2.96001508      | 1.63E-05   |
| 3.51E-08 | VCAM1, COL16A1, ITGB3, PXN, EMP2, LA     | 5.75887379      | 2.71E-05   |
| 6.02E-08 | TGFB2, POSTN, OLFML2B, COL27A1, LAM      | 5.19100478      | 1.63E-04   |
| 6.54E-08 | ADAMTS5, SPARC, OLFML2B, ITGB3, SMC      | 12.0984743      | 5.04E-05   |
| 8.48E-08 | ACAA2, ELOVL5, ELOVL2, ELOVL6, HSD17     | 7.51130644      | 1.98E-05   |
| 1.38E-07 | FADS2, ELOVL5, ELOVL2, ACOT2, SCD2, A    | 10.9138641      | 3.23E-05   |
| 2.57E-07 | IFITM3, GPSM2, CLIC4, VCAM1, HFE, MG     | 5.01995945      | 1.13E-04   |
| 5.33E-07 | CLIC4, CADM1, AHNAK, HEPACAM, AQP4       | 3.71685613      | 2.34E-04   |
| 6.03E-07 | IFITM3, RAB9, CD63, CPQ, PON2, LITAF, C  | 2.97522032      | 2.65E-04   |
| 8.40E-07 | IFITM3, CYFIP1, TEX40, SPARC, PLEKHB1,   | 1.28541636      | 3.69E-04   |
| 1.47E-06 | CYFIP1, CLIC4, CNP, HFE, AATK, ECE1, CIB | 2.20828716      | 6.44E-04   |
| 1.96E-06 | VCAM1, DST, AHNAK, ATP1A2, AQP4, CIB     | 4.60454905      | 8.60E-04   |
| 2.15E-06 | PDIA3, FKBP10, TXNDC12, HSP90B1, PDI/    | 4.89786768      | 9.44E-04   |
| 2.33E-06 | SLC27A1, DBI, SORBS1, FADS2, ACADL, FA   | 5.15680077      | 5.44E-04   |
| 2.54E-06 | AHNAK, CAPG, NDRG1, CNN3, SNX1, CDH      | 2.90152161      | 0.00111454 |
| 3.02E-06 | FADS2, ELOVL5, ELOVL2, SCD2, ELOVL6, S   | 15.342303       | 0.00815488 |
| 3.54E-06 | CNTFR, CYFIP1, SPARC, CD81, ZFAND6, PI   | 1.37423531      | 0.00272569 |
| 3.71E-06 | IFITM3, CNTFR, SLC27A1, HFE, MRGPRF, J   | 1.3377188       | 0.0016274  |
| 3.79E-06 | GPSM2, MOCS2, OAT, PON2, ITGB3, ECI1     | 2.2224777       | 0.00291998 |
| 3.99E-06 | TGFB2, NOTCH1, SEMA3C, ITGB3, SEMA3      | 3.40100313      | 0.01076726 |
| 4.05E-06 | TYRP1, TXNDC12, HSD17B12, HSD17B11,      | 2.24342571      | 0.00311396 |
| 5.01E-06 | SLC27A1, OLFML2B, CPQ, PEX11A, PLEKH     | 2.03763778      | 0.00385273 |
| 5.05E-06 | CYFIP1, MYO10, PXN, LPAR1, SEMA3E, PT    | 4.02085023      | 0.01360601 |
| 5.61E-06 | SLC12A2, SREBF1, VCAM1, CNP, PEBP1, L    | 3.6106989       | 0.01508501 |
| 7.09E-06 | CYFIP1, NOTCH1, MYO10, PXN, MTSS1L, :    | 3.72715784      | 0.00310649 |
| 7.74E-06 | RAB32, RAB10, RAB9, RAB31, LAMP2, H2     | 7.22522324      | 0.00339348 |
| 8.63E-06 | MYO10, TTYH1, ITGB3, PDPN, ITGAV, DM     | 13.2061025      | 0.00378324 |
| 8.69E-06 | CYFIP1, ARPC1B, ARPC1A, CAPG, ADD3, S    | 2.70604929      | 0.00668133 |

|          |                                         |            |            |
|----------|-----------------------------------------|------------|------------|
| 9.54E-06 | TYRP1, MGST1, TXNDC12, HSD17B12, ETI    | 2.09124798 | 0.02551931 |
| 1.08E-05 | RFTN2, PRNP, SDC4, AHNAK, EMP2, SORE    | 2.98109402 | 0.00473761 |
| 1.54E-05 | SREBF1, FDPS, HMGCS1, LCAT, VLDLR, CY   | 4.80216547 | 0.04084123 |
| 1.57E-05 | CYFIP1, MEGF10, CNP, ARL3, ITGB3, KCN   | 2.05086744 | 0.00686318 |
| 1.59E-05 | FDPS, STARD3, NSDHL, SCP2, HMGCS1, H    | 5.83290323 | 0.04228801 |
| 2.20E-05 | RHBDF1, CD63, TGFB2, ITGB3, SDC2, EMF   | 3.27042361 | 0.05787199 |
| 2.26E-05 | CD63, VCAM1, ITGB3, COL5A3, PXN, ITGE   | 5.0579021  | 0.05932141 |
| 3.87E-05 | WWTR1, H3F3B, DHH, H3F3A, TNC, SOX2     | 4.0731778  | 0.09965771 |
| 4.07E-05 | POSTN, SERPINE2, NDNF, PTN, HSD17B12    | 3.58948113 | 0.030859   |
| 4.16E-05 | POSTN, CADM4, VCAM1, CADM1, CADM        | 5.24835225 | 0.03152801 |
| 4.19E-05 | CYFIP1, ITGB3, KCNA1, CTNND2, PXN, LRI  | 1.98643324 | 0.0182327  |
| 4.57E-05 | SREBF1, FDPS, NSDHL, NPC1, HMGCS1, L    | 4.69662338 | 0.1165685  |
| 5.25E-05 | FZD1, CD63, TGFB2, SDC4, ITGB3, SDC2, F | 2.90319536 | 0.01221186 |
| 5.51E-05 | PDIA3, CNP, PEBP1, ATP1A2, ITPR3, NDR   | 3.18361399 | 0.02389934 |
| 9.38E-05 | PLP1, SCD2, ELOVL6, SCD1, FADS1         | 18.2646465 | 0.22452207 |
| 1.05E-04 | FKBP10, NOTCH1, SPARC, TTYH1, DHH, C    | 1.93852522 | 0.07761054 |
| 1.07E-04 | FDPS, OAT, ACAA2, HMGCS1, HSD17B10,     | 2.7539657  | 0.02478118 |
| 1.16E-04 | PDIA3, SLC12A2, CNTFR, KCNJ10, NOTCH    | 2.48477189 | 0.04966211 |
| 1.27E-04 | CNTFR, NOTCH1, CD81, TNC, CIB1, PTN, C  | 2.06235491 | 0.29115884 |
| 1.28E-04 | ADAM17, EFEMP1, H2-K1, LPAR1, NR2F1     | 5.13693182 | 0.29282391 |
| 1.31E-04 | FDPS, NSDHL, HMGCS1, HMGCS2, 06100      | 8.52350168 | 0.29882315 |
| 1.52E-04 | LHCGR, TGFB2, HMGCS1, H3F3B, H3F3A,     | 3.81600649 | 0.33815127 |
| 1.61E-04 | FZD1, CADM1, SDC2, ARHGEF16, LPAR1,     | 3.79641781 | 0.11647319 |
| 1.64E-04 | NTRK2, LHCGR, RAMP2, NOTCH1, ITGB3,     | 3.54790813 | 0.06955276 |
| 1.70E-04 | COL27A1, SDC4, ITGB3, LAMA4, COL5A3,    | 4.01828631 | 0.03895329 |
| 1.83E-04 | ACAA2, ELOVL5, ELOVL2, ACOT2, ACOT1,    | 7.93353964 | 0.04200574 |
| 2.27E-04 | SLC27A1, TMED10, PON2, ECI2, MGST1,     | 1.85392879 | 0.09502974 |
| 2.34E-04 | GSTK1, GPX1, MGST1, GPX8, GSTT1, PRD    | 10.1627184 | 0.16499667 |
| 2.34E-04 | LPAR1, EMP1, EMP2, EMP3, PRDX6          | 14.9438017 | 0.46976827 |
| 2.38E-04 | CD63, SLC9A3R1, FRMD6, TMEM33, HEP      | 5.3797686  | 0.47515208 |
| 2.45E-04 | SMOC1, NDNF, RSU1, PTN, HSD17B12, N     | 6.2621645  | 0.4858335  |
| 2.50E-04 | CST3, TGFB2, GSAP, APOE, HSD17B10, IT   | 7.64935797 | 0.17515757 |
| 2.62E-04 | RAMP2, TGFB2, POSTN, ANGPT2, VCAM1      | 2.91092803 | 0.5082746  |
| 2.94E-04 | SLC27A1, ACAA2, ELOVL5, ELOVL2, ECI1,   | 3.16118881 | 0.54938488 |
| 2.95E-04 | FZD1, SREBF1, TGFB2, HMGCS1, MGST1,     | 2.32753017 | 0.55069083 |
| 3.46E-04 | TGFB2, GPX1, FABP5, SERPINE2, MDK, PE   | 5.1015047  | 0.60830126 |
| 3.52E-04 | FDPS, NSDHL, HMGCS1, HMGCS2, APOE,      | 7.19170455 | 0.61539273 |
| 3.80E-04 | GAMT, SLC9A3R1, CLIC4, KCNJ10, VCAM1    | 4.46823016 | 0.15381348 |
| 3.92E-04 | FADS2, ELOVL5, FADS6, ELOVL2, FASN, S   | 4.44275184 | 0.65475966 |
| 3.95E-04 | RAB9, GAL3ST1, NOTCH1, SYS1, TMED10,    | 2.19087414 | 0.15929728 |
| 4.20E-04 | SLC9A3R1, VCAM1, PTPRZ1, MYO10, PAL     | 4.4102012  | 0.16830033 |
| 4.52E-04 | SLC27A1, ACAA2, ECI1, TYRP1, ECI2, ALD  | 2.05921068 | 0.70607135 |
| 4.85E-04 | P2RY12, VCAM1, ITGB3, HFE, H2-K1, ECE   | 2.35674474 | 0.19167873 |

|            |                                         |            |            |
|------------|-----------------------------------------|------------|------------|
| 4.92E-04   | RAB9, CD63, STARD3, SLC31A2, CTNS, IRC  | 3.36993237 | 0.19415284 |
| 4.97E-04   | NTRK2, NOTCH1, CDKN2C, PTPRZ1, CNP,     | 6.7686631  | 0.74002188 |
| 5.33E-04   | CYFIP1, MYO10, ARPC1B, ARPC1A, IQGAF    | 3.33624595 | 0.33723413 |
| 5.38E-04   | SLC12A2, EFEMP2, SERPINE2, ATP1A2, AI   | 5.54425293 | 0.21047452 |
| 5.82E-04   | PRDX4, PRDX1, CAT, APOE, SOD3, PRDX6    | 8.46893204 | 0.36145844 |
| 5.92E-04   | RAB9, FKBP10, FKBP2, NOTCH1, TMED10     | 1.81749982 | 0.22883139 |
| 6.46E-04   | AHNAK, ARHGEF16, CAPG, NDRG1, PRDX      | 2.42836761 | 0.39234259 |
| 6.50E-04   | TGFBR3, TGFB2, ITGB3, EMP1, NDNF, ITG   | 5.36756957 | 0.82864479 |
| 7.01E-04   | SFRP1, MMP14, ANGPT2, EDNRB, FNTA, I    | 4.10954545 | 0.85056319 |
| 7.77E-04   | IFITM3, RAB9, CD63, LPAR1, ECE1, ATP1A  | 1.93513792 | 0.28919377 |
| 8.22E-04   | CD63, CTNS, LITAF, LAPTM4B, CTSO, LAP   | 3.13997236 | 0.17500377 |
| 8.32E-04   | SFRP1, NOTCH1, FAM212A, SEMA3C, ITP     | 5.15707665 | 0.89531305 |
| 8.32E-04   | PRNP, PTPRZ1, GM2A, TMOD2, LAMB1, N     | 5.15707665 | 0.89531305 |
| 9.82E-04   | CST3, SERPINE2, TIMP2, TIMP3, PLAT, PIK | 7.58685315 | 0.93028005 |
| 9.92E-04   | CST3, POSTN, RAMP2, CCND1, IFI27, DHF   | 3.58059406 | 0.93208798 |
| 0.0010385  | SLC27A1, OAT, ACAA2, ECI1, ECI2, CSAD,  | 1.98020958 | 0.55116548 |
| 0.00114352 | ARHGEF10, LGI4, DAG1, POU3F2, SIRT2     | 10.2738636 | 0.95503382 |
| 0.00114507 | TGFB2, POSTN, SYS1, WIPI1, SOD3, RAB3   | 2.89890054 | 0.39527153 |
| 0.00117805 | RAB32, RAB9, RAP1A, RAB31, LAMP1, RA    | 5.79780109 | 0.40397228 |
| 0.00118545 | GAMT, GATM, OAT, ALDH2, SMOX, P4HA      | 4.81100946 | 0.24236891 |
| 0.00121566 | SFRP1, ITGB3, PXN, LAMB1, ITGAV, ANTX   | 5.75336364 | 0.96303014 |
| 0.0012427  | SOX2, NTRK2, CDH2, IGFBP4, ITGB3, KIT,  | 3.47730769 | 0.96564671 |
| 0.00127475 | COL5A3, CTSK, PTN, NID1                 | 16.9378641 | 0.62598525 |
| 0.00142757 | PDIA3, PRDX4, CALR, PPIB, PDIA4, HSP90  | 7.02590674 | 0.465888   |
| 0.00143948 | SDC4, ITGB3, CTSK, TNC, ITGAV, HSD17B1  | 7.00877134 | 0.6706503  |
| 0.00145974 | RAB32, SH3PXD2B, CPE, RAB38, FERMT2     | 9.66951872 | 0.98094164 |
| 0.00158697 | RAB9, MOCS2, CLIC4, SYS1, SERPINE2, SA  | 1.42762959 | 0.50203888 |
| 0.00163488 | TGFB2, ADAM17, SFRP1, MMP14, H3F3B      | 3.65292929 | 0.98815412 |
| 0.00164467 | PRNP, SPARC, NPC1, CAT, MT1, B2M        | 6.80200627 | 0.98846497 |
| 0.00167326 | FNTA, CTSL, ITGB3, H2-K1, H2-Q4, ITGAV, | 3.64255141 | 0.72505036 |
| 0.00167718 | SPARC, CHADL, CTSK, SERPINH1, SPARCL1   | 4.59331907 | 0.72588122 |
| 0.00169889 | FDPS, GSTK1, HSDL2, SCP2, PEX11A, EPH2  | 3.1107068  | 0.52595267 |
| 0.00177506 | GJA1, CDH2, ITGB3, CTNNA1, DAG1, ITGA   | 3.95831189 | 0.34014423 |
| 0.00178321 | SLC35B2, FAM134B, SPCS1, ELOVL5, TME    | 3.61261162 | 0.54320804 |
| 0.00179241 | CPQ, ECE1, PLAT, PRSS23, ADAMTS5, CTS   | 1.45844622 | 0.74922184 |
| 0.0018529  | GSTK1, PEX5L, SCP2, PEX11A, EPHX2, PRI  | 3.55029313 | 0.35207581 |
| 0.00191971 | SLC9A3R1, CYFIP1, NOTCH1, MYO10, PAL    | 3.57458413 | 0.56982487 |
| 0.00192498 | PSMB2, H2-K1, CALR, B2M, PSMB8, H2-D    | 6.57527273 | 0.99461238 |
| 0.00192498 | GJA1, SPARC, RGCC, LECT1, APOE, NR2F2   | 6.57527273 | 0.99461238 |
| 0.00193948 | ARHGEF16, CAPG, NDRG1, PRDX6, SEPT2     | 2.60923521 | 0.99482049 |
| 0.00196229 | PRDX4, GPX1, PRDX1, CAT, GPX8, PRDX6    | 6.55659255 | 0.78006329 |
| 0.00201505 | ITGB3, PDPN, ITGAV, ANTXR1, FERMT2      | 8.93646032 | 0.58749278 |
| 0.00201505 | AHNAK, SDC4, DAG1, DMD, VCL             | 8.93646032 | 0.58749278 |

|            |                                          |            |            |
|------------|------------------------------------------|------------|------------|
| 0.00203929 | KCNJ10, ID4, PLP1, HES5                  | 14.6117172 | 0.9960505  |
| 0.00205566 | ADAM17, ITGB3, PXN, PLP1, ITGA7, ITGB1   | 3.53509286 | 0.99622229 |
| 0.00212261 | PDIA3, FKBP10, FKBP2, HMGCS1, ECI1, ECI2 | 3.24028704 | 0.80568384 |
| 0.00219604 | GJC3, GAL3ST1, DHH, LGI4, PLP1, LPAR1,   | 4.38351515 | 0.99742014 |
| 0.00235772 | GSTK1, GPX1, GSTA4, MGST1, GPX8, GSTP1   | 4.28617207 | 0.42440833 |
| 0.00239333 | SERPINE2, TMPRSS5, KCNA1, SDC2, LPAR1    | 1.84419088 | 0.65073748 |
| 0.00245467 | CST3, PRNP, MMP14, GPX1, PON2, PRDX1     | 2.96628845 | 0.99872244 |
| 0.00258798 | FKBP10, FKBP2, CALR, FKBP9, PPIB, PDIA3  | 6.16431818 | 0.99911073 |
| 0.00270493 | APOC1, VLDLR, APOE                       | 32.8763636 | 0.9993529  |
| 0.00284789 | PDIA3, SFRP1, TNC, PTN                   | 13.1505455 | 0.99956128 |
| 0.00284789 | FZD1, WWTR1, SLC9A3R1, SFRP5             | 13.1505455 | 0.99956128 |
| 0.00296771 | IFITM3, RAB9, SLC27A1, CLIC4, NOTCH1,    | 1.73472465 | 0.72876328 |
| 0.00297516 | NR4A1, CCND1, TIMP2, TIMP3, CALR, POI1   | 5.97752066 | 0.99968961 |
| 0.00314342 | GPSM2, ARPC1B, ARPC1A, CIB1, SGCE, M     | 1.52554129 | 0.74895796 |
| 0.00333418 | GPX1, PRDX1, CAT, SOD3, PRDX6            | 7.82770563 | 0.99988309 |
| 0.00339928 | SPARC, AHNAK, CD81, ECE1, CIB1, CST3, S  | 2.69183622 | 0.77571283 |
| 0.00351981 | NTRK2, SERPINE2, LRRTM1, ITPR3, DBI, P   | 4.69662338 | 0.99992944 |
| 0.00351981 | GSTK1, GPX1, GSTA4, MGST1, CTNS, GSTP1   | 4.69662338 | 0.99992944 |
| 0.00354664 | SLC9A3R1, ITGB3, PDPN, ITGAV, EZR        | 7.7178521  | 0.78981018 |
| 0.00368536 | GJA1, DST, CDH2, CTNNA1, ATP1A2, PTK2    | 4.66097734 | 0.80227155 |
| 0.0038207  | GSTK1, FDPS, OAT, ACAA2, UQCCL2, ECI1,   | 2.52882813 | 0.8137189  |
| 0.0038281  | NOTCH1, SOX6, S100B, HES5                | 11.9550413 | 0.9999695  |
| 0.00387214 | GJA1, ANGPT2, CDH2, ITGA7, NR2F2, FGF1   | 5.63594805 | 0.99997295 |
| 0.00405677 | TGFB2, NOTCH1, SPARC, CD81, TNC, CIB1    | 2.31727673 | 0.99998363 |
| 0.00411313 | SFRP1, RGCC, ACAA2, NDNF, VLDLR, PTN,    | 3.19187996 | 0.99998596 |
| 0.00412438 | FZD1, CD63, LGALS3, GSTK1, TST, ID3, AL  | 3.92553596 | 0.99998638 |
| 0.00432303 | COL27A1, ITGB3, LAMA4, COL11A1, PXN,     | 2.27767598 | 0.63715623 |
| 0.00458606 | PXN, CTNNA1, DAG1, DMD                   | 11.2919094 | 0.97110209 |
| 0.00458606 | AHNAK, S100A1, S100B, EZR                | 11.2919094 | 0.97110209 |
| 0.00464057 | ARHGAP26, ARPC1B, PXN, ARPC1A, CTNN      | 3.40008842 | 0.66325248 |
| 0.00470214 | TGFBR3, NOTCH1, HEY2, NCAM1, FGFR1       | 7.14703557 | 0.99999718 |
| 0.00494759 | SOX2, TSPAN15, TSPAN14, NOTCH1, KIT,     | 5.33130221 | 0.99999855 |
| 0.00505246 | CYFIP1, TEX40, NOTCH1, SERPINE2, SEMA    | 1.601669   | 0.99999891 |
| 0.00530102 | PSAT1, PHGDH, PSPH                       | 24.6572727 | 0.99999945 |
| 0.00555778 | CNP, S100A1, PLP1, CKB, NDRG2, SIRT2     | 5.19100478 | 0.99999973 |
| 0.00568763 | TGFBR3, TGFB2, LAMA4, HEY2, ITGAV, AN    | 3.704379   | 0.99999981 |
| 0.00570773 | TMPPRSS5, CPQ, DHH, FGL2, HTRA1, ECE1    | 1.77256717 | 0.98788447 |
| 0.00581754 | ACAA2, ACADL, ALDH2, ECI1, ECI2, ACSB    | 4.20963328 | 0.74469043 |
| 0.00583264 | HFE, H2-K1, H2-Q4, H2-D1                 | 10.423301  | 0.98900295 |
| 0.00613962 | CXCL10, ANGPT2, SPARC, RGCC, CD59A, I    | 3.65292929 | 0.99999994 |
| 0.0062192  | GPX1, APOC1, CAT, DBI, APOE, SCD1        | 5.0579021  | 0.99999995 |
| 0.00634201 | HMGCS1, CCND1, CAT, GSTT1                | 10.1158042 | 0.99999997 |
| 0.00634201 | TGFBR3, TGFB2, NOTCH1, HEY2              | 10.1158042 | 0.99999997 |

|            |                                         |            |            |
|------------|-----------------------------------------|------------|------------|
| 0.00640364 | SOX2, NOTCH1, CDH2, HES5, FOXO1         | 6.57527273 | 0.99999997 |
| 0.00640364 | PREX2, ERBB3, PIK3R1, SIRT2, ZFP36L1    | 6.57527273 | 0.99999997 |
| 0.00665268 | TGFBR3, PTPRZ1, ITGB3, ITGAV, FGFR1     | 6.51456311 | 0.9941794  |
| 0.00680428 | FDPS, FNTA, HMGCS1, HMGCS2, ZMPSTE      | 6.40596368 | 0.79762697 |
| 0.0068853  | NTRK2, TGFB2, CADM1, TTYH1, CADM2, I    | 1.92737712 | 0.95183386 |
| 0.00712324 | KCNJ10, ACADL, ALDH1A1, CAT, ALDOC, A   | 3.55420147 | 1          |
| 0.0072114  | SLC12A2, KCNJ10, CADM1, MEGF10, KCN     | 2.34196891 | 0.95830089 |
| 0.00738941 | ITGB3, DAG1, EMP2, CIB1, DMD            | 6.32237762 | 1          |
| 0.00738941 | SEMA3C, ITGB3, SEMA3B, ITGAV, SEMA3     | 6.32237762 | 1          |
| 0.00742153 | CLIC4, SLC27A1, ACAA2, SLC44A1, ECI1, E | 1.36149907 | 0.9620012  |
| 0.00765666 | SPARC, MDK, CTSL, LCAT, ALPL, ACSBG1,   | 3.50681212 | 1          |
| 0.00789164 | CADM4, CADM1, CADM2, CD200              | 9.39324675 | 1          |
| 0.00789164 | TGFB2, NOTCH1, HEY2, CPE                | 9.39324675 | 1          |
| 0.00789164 | SLC27A1, FABP5, LCAT, CHPT1             | 9.39324675 | 1          |
| 0.00789164 | NOTCH1, ID4, HES5, SIRT2                | 9.39324675 | 1          |
| 0.00789164 | GPX1, PRDX1, CAT, PRDX6                 | 9.39324675 | 1          |
| 0.00804269 | ZFAND6, CIB1, PIK3R1, YBX3, FOXO1, IFIT | 1.684478   | 1          |
| 0.0081664  | SCD2, SCD1, FADS1                       | 20.3254369 | 0.99820391 |
| 0.00847012 | MMP14, COL11A1, ITGA7, LAMB1, ITGAV     | 6.08821549 | 1          |
| 0.00865069 | VCAM1, CADM1, SDC4, SDC2, H2-K1, LRR    | 2.36467055 | 0.86906693 |
| 0.00865774 | RGCC, CD59A, FGFR1                      | 19.7258182 | 1          |
| 0.00887139 | BCAN, PRNP, CNTFR, VCAM1, CD59A, LSA    | 2.64924852 | 0.97999793 |
| 0.00941941 | TSPAN15, SLC9A3R1, TSPAN14, CDH2, RA    | 4.58739958 | 1          |
| 0.0096449  | ADAM17, COL16A1, ITGB3, ITGAV           | 8.7670303  | 1          |
| 0.0096449  | MT2, NDNF, MT1, APOE                    | 8.7670303  | 1          |
| 0.0099513  | CHL1, PALLD, FLRT3, RAB13, TNC, PHGDF   | 2.60172662 | 1          |
| 0.00997324 | CD63, NTRK2, SNX1, GRB14, LAMP1, TYR    | 2.78348764 | 0.9877255  |
| 0.01020747 | GPSM2, MARCKS, MYO10, DST, USP2, PX     | 2.59405584 | 0.98893653 |
| 0.01063642 | H2-K1, H2-Q4, B2M, H2-D1                | 8.48963731 | 0.99085363 |
| 0.01160676 | CHL1, CTNNA1, APOE, JAM3                | 8.21909091 | 1          |
| 0.01201168 | ERBB3, ITGB3, ITGAV                     | 16.9378641 | 0.99991012 |
| 0.01201168 | FADS2, SCD2, SCD1                       | 16.9378641 | 0.99991012 |
| 0.01244842 | SOX2, WWTR1, SFRP1, NOTCH1, CDH2, S     | 2.90085561 | 1          |
| 0.01263786 | TMEM59, H2-K1, H2-Q4, H2-D1             | 7.99024688 | 0.99624014 |
| 0.01272668 | TGFBR3, FZD1, HEY2                      | 16.4381818 | 1          |
| 0.01290752 | RAP1A, SDC4, PXN, DAG1, MMD2, VLDLR     | 3.59585227 | 1          |
| 0.01310684 | FZD1, CYFIP1, CADM1, MYO10, S100A1, C   | 1.77878115 | 0.99694795 |
| 0.0131278  | NOTCH1, CADM4, CADM1, CADM2, ITGB       | 2.36342289 | 0.9999624  |
| 0.01378112 | NOTCH1, EDNRB, HES5, HMG1               | 7.73561497 | 1          |
| 0.01379803 | DST, PALLD, PXN, SORBS1, PTK2, VCL, FEF | 3.54790813 | 0.99775604 |
| 0.01384007 | VCAM1, SH3PXD2A, PALLD, SH3PXD2B, V     | 5.30602332 | 0.99779764 |
| 0.01386654 | PDIA3, PRDX4, GPX1, PRDX1, TXNDC12, F   | 3.54053147 | 1          |
| 0.0147339  | RAMP2, CLIC4, NOTCH1, ANGPT2, NDNF,     | 2.0633701  | 1          |



|                                                     |            |            |
|-----------------------------------------------------|------------|------------|
| 0.01481504 NOTCH1, CCND1, ITGB3, PLCE1, ATP1A2,     | 2.58486254 | 0.96958003 |
| 0.01542426 SLC12A2, KCNJ10, KCNA1, KCNH8, KCNK1     | 2.58869005 | 1          |
| 0.01549469 GSTK1, GSTA4, MGST1, GSTT1, GSTM5        | 5.13268608 | 0.9999941  |
| 0.01593152 SFRP1, BAMBI, NRARP, LGR5, LGR4, WLS,    | 3.43484396 | 1          |
| 0.0160563 DST, AHNAK, ARPC1B, ARPC1A, SEPT2, CT     | 2.19632408 | 0.99917976 |
| 0.01609949 ZEB2, EDNRB, SEMA3C, SEMA3B, SEMA3I      | 4.02567718 | 1          |
| 0.01617091 SLC12A2, SOX2, COL11A1, KIT              | 7.30585859 | 1          |
| 0.01617091 SLC27A1, ACOT2, ACOT1, ACSBG1            | 7.30585859 | 1          |
| 0.01649055 ELOVL5, ELOVL2, ELOVL6                   | 14.5181692 | 0.99999729 |
| 0.01649055 ELOVL5, ELOVL2, ELOVL6                   | 14.5181692 | 0.99999729 |
| 0.01649055 ELOVL5, ELOVL2, ELOVL6                   | 14.5181692 | 0.99999729 |
| 0.01649055 ELOVL5, ELOVL2, ELOVL6                   | 14.5181692 | 0.99999729 |
| 0.01724439 ENTPD2, LAMA4, LAMB1, NID1               | 7.14916826 | 0.9995174  |
| 0.01724439 CST3, GJA1, DBI, CRYAB                   | 7.14916826 | 0.9995174  |
| 0.01746164 PXN, PIK3R1, PTK2                        | 14.0898701 | 1          |
| 0.01746164 ELOVL5, ELOVL2, ELOVL6                   | 14.0898701 | 1          |
| 0.01746164 ELOVL5, ELOVL2, ELOVL6                   | 14.0898701 | 1          |
| 0.01746164 ELOVL5, ELOVL2, ELOVL6                   | 14.0898701 | 1          |
| 0.01746164 NOTCH1, HEY2, HES5                       | 14.0898701 | 1          |
| 0.01754238 RAB10, RAB31, RAB13, ENPP1, PIK3R1, SC   | 2.98876033 | 1          |
| 0.01796506 SLC9A3R1, NOTCH1, VCAM1, FABP7, CIB1     | 3.34802598 | 0.99965028 |
| 0.01846116 MOCS2, GAL3ST1, ACAA2, CSAD, SAT1, TI    | 1.32359628 | 0.98722523 |
| 0.01893732 ACADL, SCP2, ECI2, DBI, ACADM            | 4.83938974 | 0.9999996  |
| 0.0189562 WWTR1, TGFB2, NOTCH1, RGCC, BAMBI         | 4.83475936 | 1          |
| 0.01941999 PEX5L, PEX11A, PXMP2, CAT, MGST1, DH     | 3.84436406 | 0.99981759 |
| 0.01984409 STARD3, SLC27A1, SCP2, ABCA8A, ABCA8     | 2.66565111 | 1          |
| 0.01994509 CD63, CYFIP1, SREBF1, CLIC4, TMED10, A   | 1.79787384 | 0.99999982 |
| 0.0203879 CADM4, VCAM1, CADM1, CDH2, CADM2,         | 3.79342657 | 1          |
| 0.02067973 NSDHL, DHH, ARL3, B9D1, IFT57, SEPT2, I  | 3.24133163 | 1          |
| 0.02080616 SPCS2, SPCS1, CYP2J6, SCD2, FMO1, SCD    | 2.8900893  | 0.99990197 |
| 0.02082209 FMNL2, DAAM2, ARHGEF16, IQGAP2, VC       | 4.70496224 | 0.99999991 |
| 0.02139299 IFITM3, CD63, STARD3, AHNAK, CTNS, IR    | 2.03170807 | 0.99992466 |
| 0.02156248 H2-K1, H2-Q4, H2-D1                      | 12.7033981 | 0.99999995 |
| 0.02156248 SEMA3C, SEMA3B, SEMA3E                   | 12.7033981 | 0.99999995 |
| 0.02156248 SNX1, CD81, HFE                          | 12.7033981 | 0.99999995 |
| 0.02160408 EDNRB, TYRP1, KIT, SOX10                 | 6.57527273 | 1          |
| 0.02202308 NTRK2, CYFIP1, SERPINE2, SEMA3C, MET     | 1.74410417 | 1          |
| 0.02242646 CST3, CASP12, CHL1, ITGB3, KIT, TIMP2, T | 2.60582524 | 0.99999997 |
| 0.02245314 TMEM47, NOTCH1, CDH2, CTNND2, CTNI       | 3.70456901 | 0.99995318 |
| 0.02262156 LDHB, GPD1, ME1, PHGDH, HSD17B10, SI     | 3.69553398 | 0.99999998 |
| 0.02279002 TGFB3, SERPINE2, NDNF, PTN               | 6.45251965 | 0.99999998 |
| 0.02281859 SREBF1, FDPS, SCP2                       | 12.3286364 | 1          |
| 0.02296704 PDIA3, H2-K1, H2-Q4, B2M, H2-D1          | 4.56616162 | 1          |

|            |                                         |            |            |
|------------|-----------------------------------------|------------|------------|
| 0.02362532 | RAB32, RAB10, HFE, H2-K1, PSMB8, H2-D   | 3.65292929 | 1          |
| 0.02362532 | TGFBR3, ADAM17, SNX1, BAMBI, HTRA1,     | 3.65292929 | 1          |
| 0.02464906 | CDH2, RXRG, HES5, SIRT2                 | 6.2621645  | 1          |
| 0.02464906 | NOTCH1, CDH2, METRN, PLP1               | 6.2621645  | 1          |
| 0.02630546 | TGFB2, MMP14, CCND1, DHH, ARPC1B, C     | 3.06846061 | 1          |
| 0.02714834 | CAT, ME1, FMO1, CRYM, TM7SF2            | 4.34304207 | 1          |
| 0.02717696 | MMP14, SPARC, CADM1, SH3PXD2B, PPII     | 3.52246753 | 1          |
| 0.02718878 | LHCGR, LGR5, LGR4                       | 11.2919094 | 1          |
| 0.02745633 | TGFBR3, FZD1, TGFB2, NOTCH1, HEY2       | 4.32583732 | 1          |
| 0.02785573 | SOX2, NOTCH1, ZFP536, ID4, CALR, GPR3   | 3.02808612 | 1          |
| 0.02791283 | NR4A1, RAMP2, NOTCH1, VCAM1             | 5.97752066 | 1          |
| 0.02828874 | CYFIP1, ITGB3, ARPC1B, PXN, ARPC1A, PII | 1.93682658 | 0.99878741 |
| 0.02855824 | RAB9, ARL3, RHOBTB3, RHOC, RND3, RAE    | 1.95029276 | 1          |
| 0.02872276 | ADAM17, PTPRZ1, ITGB3, PDPN, CIB1, ITG  | 3.00898537 | 0.99999722 |
| 0.02875554 | TGFBR3, VCAM1, PDPN                     | 10.9587879 | 1          |
| 0.02875554 | CTNNA1, RHOC, VCL                       | 10.9587879 | 1          |
| 0.02882786 | RAMP2, TGFB2, NOTCH1, SPARC, VCAM1      | 1.88944619 | 1          |
| 0.02891738 | COL27A1, COL14A1, COL5A3, COL11A1, A    | 2.67885754 | 0.99895781 |
| 0.02906451 | ACAA2, SCP2, ELOVL2, ELOVL6             | 5.89143098 | 1          |
| 0.02907327 | CTSO, PSMB2, CTSL, CTSK, PSMB8, CTSC    | 3.46066986 | 1          |
| 0.02907427 | COL27A1, ANGPT2, ITGB3, LAMA4, COL1:    | 1.67905601 | 0.99899648 |
| 0.02961783 | CTSO, SFRP1, CASP12, CTSL, CTSK, CTSC   | 3.4449893  | 1          |
| 0.030073   | FZD1, NDRG2, WNT6, SLC9A3R1, SFRP1, C   | 2.00653863 | 1          |
| 0.03041588 | GPX1, GPX8, ATP1A2, ITPR3, ATP1B2, PDI  | 2.9467433  | 0.99927389 |
| 0.0308211  | ENTPD2, FABP7, RBP1, RDH5, VIM, PTPN:   | 2.66341563 | 0.99999893 |
| 0.03139443 | HMGCS1, CCND1, PSMB2, MGST1             | 5.71762846 | 1          |
| 0.03139443 | PXN, ITGAV, SORBS1, FERMT2              | 5.71762846 | 1          |
| 0.03193708 | BCAN, COL27A1, COL5A3, COL11A1, LAM     | 4.13118636 | 1          |
| 0.03243336 | SNX1, RAMP2, RAB31, CD81, EZR           | 4.10954545 | 1          |
| 0.03243336 | SOX2, CST3, TGFB2, SMOC1, SH3PXD2B      | 4.10954545 | 1          |
| 0.03251126 | TMPRSS5, CPQ, DHH, HTRA1, ECE1, PLAT:   | 1.52519213 | 1          |
| 0.03320083 | FXYD1, ATP1A2, ATP1B2                   | 10.1875648 | 0.99999963 |
| 0.03333252 | PRDX4, PRDX1, PRDX6                     | 10.1627184 | 1          |
| 0.03458655 | IFITM3, DST, GPNMB, KCNA1, RAB13, ZFY   | 2.24891054 | 0.99999981 |
| 0.03510678 | IRGM1, GBP2, IFIT1, IFIT3, GBP3         | 4.00931264 | 1          |
| 0.03523245 | RAB32, CD63, RAB38                      | 9.86290909 | 1          |
| 0.03523245 | STARD13, GPX1, ITGB3                    | 9.86290909 | 1          |
| 0.03523245 | LGI4, DAG1, POU3F2                      | 9.86290909 | 1          |
| 0.03523245 | GPX1, SELM, GSTT1                       | 9.86290909 | 1          |
| 0.03525482 | SREBF1, SFRP1, CTSL, ANGPTL4, FOXO1, F  | 3.28763636 | 1          |
| 0.03525482 | CST3, H3F3B, H3F3A, BSG, EMP2, LAMB1    | 3.28763636 | 1          |
| 0.03538237 | NTRK2, GJA1, CHL1, NR2F1, NDNF, NR2F:   | 2.38618768 | 1          |
| 0.0374304  | ACAA2, ALDH2, HMGCS1, HMGCS2, ACAI      | 3.21462905 | 0.99986722 |

|            |                                         |            |            |
|------------|-----------------------------------------|------------|------------|
| 0.03753069 | SLC9A3R1, CDH2, CTNND2, PXN, CTNNA1     | 2.82297735 | 1          |
| 0.03812163 | NOTCH1, NRARP, VLDLR, YBX3, BACH1, M    | 1.44313256 | 1          |
| 0.03848063 | CXCL10, ADAM17, NOTCH1, EDNRB, SPAI     | 2.00262114 | 1          |
| 0.03900442 | RAB10, RAB31, SYS1, SPTBN1              | 5.26021818 | 1          |
| 0.0400048  | LGALS3, DAG1, ITGA7, NID1               | 5.21165049 | 1          |
| 0.04146535 | PDIA3, FKBP10, FKBP2, CALR, FKBP9, PPIE | 2.31161932 | 1          |
| 0.04221119 | TGFB2, NOTCH1, HEY2                     | 8.96628099 | 1          |
| 0.04221119 | TGFB2, NOTCH1, KIT                      | 8.96628099 | 1          |
| 0.04221119 | P2RY12, TGFB2, MATN2                    | 8.96628099 | 1          |
| 0.04237808 | PSAT1, GPT2, CAT, ME1, SUCLG2, PHGDH    | 2.28626635 | 0.99996024 |
| 0.04312812 | CXCL10, NOTCH1, CMTM5, ID3              | 5.0579021  | 1          |
| 0.04312812 | KCNJ10, KCNJ16, ATP1A2, ATP1B2          | 5.0579021  | 1          |
| 0.04335414 | RAB9, SLC35B2, CLIC4, SLC27A1, SYS1, SL | 1.24504341 | 1          |
| 0.04405152 | SEMA3C, FLRT3, SEMA3B, SEMA3E           | 5.01862639 | 1          |
| 0.04421809 | TGFB2, COL27A1, LAMA4, COL5A3, COL1     | 2.26672561 | 0.99997465 |
| 0.04438192 | IFITM3, SLC35B2, PLEKHB1, MRGPRF, AQ    | 1.10101141 | 1          |
| 0.04452743 | STARD13, NSDHL, ABHD4, LPCAT2, PLIN3    | 3.08714084 | 1          |
| 0.04500954 | GAMT, GATM, PSAT1, PHGDH, PSPH          | 3.68342912 | 0.99997912 |
| 0.04508957 | IFITM3, CD63, STARD3, TMEM59, NPC1, I   | 2.70124823 | 1          |
| 0.04544539 | LHCGR, S100A1, FXD1, PIK3R1, ATP1B2,    | 2.69466019 | 1          |
| 0.04558176 | NTRK2, PTPRZ1, PALLD, LRRTM1, TMOD2     | 2.13575781 | 1          |
| 0.04611007 | RAP1A, VCAM1, PXN, CTNNA1, PIK3R1, E    | 2.24751607 | 0.99998406 |
| 0.04671598 | CST3, GPX1, CNP, PON2, EPHX2, PEBP1, I  | 2.67598309 | 1          |
| 0.0468504  | PPIB, PDIA4, HSP90B1                    | 8.48963731 | 1          |
| 0.0468504  | CDH2, DAG1, EZR                         | 8.48963731 | 1          |
| 0.0468504  | RAB32, TYRP1, RAB38                     | 8.48963731 | 1          |
| 0.04703292 | IGFBP4, ITGB3, ITGAV                    | 8.46893204 | 1          |
| 0.0470412  | TGFB2, MDK, CAT, PTN, SIRT2             | 3.65292929 | 1          |
| 0.0470412  | ADAM17, EFEMP1, ERBB3, PTK2, HBEGF      | 3.65292929 | 1          |
| 0.04734615 | LMO4, KCTD1, PIK3R1, SORBS1, SOX10, F   | 1.68388122 | 1          |
| 0.04746037 | RAMP2, RAB13, PTPN13, MTDH              | 4.87057239 | 1          |
| 0.04781127 | CD63, NOTCH1, CD81, KCNA1, GRIK3, LP/   | 1.32697706 | 1          |
| 0.04965544 | CCND1, DHH, MGST1                       | 8.21909091 | 1          |
| 0.04965544 | CXCL10, LHCGR, PEBP1                    | 8.21909091 | 1          |
| 0.04965544 | NOTCH1, ID4, TNC                        | 8.21909091 | 1          |
| 0.04965544 | ELOVL5, ELOVL2, ELOVL6                  | 8.21909091 | 1          |
| 0.0498913  | SLC9A3R1, TIMP3, DMD, NDRG2, EZR, DL    | 2.98876033 | 1          |
| 0.0498913  | RAB9, PRNP, CDH2, MMD2, B9D1, SEPT2     | 2.98876033 | 1          |
| 0.04991433 | DST, PALLD, PACSIN3, ALDOC, EZR, CRYAI  | 2.98903484 | 1          |
| 0.05030499 | POSTN, SFRP1, VCAM1, ZFAND6, GPD1, C    | 2.39100826 | 1          |
| 0.05033483 | FZD1, SFRP1, NOTCH1, HTRA1, SOSTDC1     | 3.57351779 | 1          |
| 0.05034834 | TGFB2, ITGB3, DAG1, ITGA7, ITGB8, ITGA  | 2.61103836 | 0.99999438 |
| 0.05064979 | NTRK2, DST, CTNND2, SORBS2, GRIK2, AI   | 1.84711774 | 1          |



|            |                                        |            |            |
|------------|----------------------------------------|------------|------------|
| 0.05118959 | LAPTM4B, SLC9A3R1, PPP1R14C, GPNMB     | 2.38305609 | 1          |
| 0.0519977  | CDH2, VIM, LRRC4C, POU3F2              | 4.69662338 | 1          |
| 0.0543142  | GJA1, CDH2, VCL                        | 7.83658828 | 1          |
| 0.0543142  | SGCE, DAG1, DMD                        | 7.83658828 | 1          |
| 0.05452388 | NPC1, GM2A, APOE                       | 7.81747573 | 1          |
| 0.05452388 | HSD17B12, HSD17B11, HSD17B10           | 7.81747573 | 1          |
| 0.0552932  | NTRK2, CADM1, ELOVL5, KCNA1, CTNND1    | 1.52466956 | 1          |
| 0.05545462 | TGFBR3, NTRK2, RAMP2, HEY2, PTK2, ZFP  | 2.90085561 | 1          |
| 0.05550795 | CNTFR, NTRK2, FAM134B, ERBB3, CHL1, I  | 2.05477273 | 1          |
| 0.05673629 | RAP1A, CCND1, HFE, SULF2               | 4.53467085 | 1          |
| 0.05673629 | RAMP2, NOTCH1, NRARP, SEMA3E           | 4.53467085 | 1          |
| 0.05729141 | MMP14, H3F3B, H3F3A, TIMP2, ME1        | 3.42462121 | 1          |
| 0.05729141 | WWTR1, ID4, ENPP1, FOXO1, SIRT2        | 3.42462121 | 1          |
| 0.05735159 | FZD1, SFRP1, SFRP5, WLS                | 4.51676375 | 1          |
| 0.05753061 | DBI, APOE, SORBS1                      | 7.58685315 | 1          |
| 0.05753061 | ANGPT2, RGCC, APOE                     | 7.58685315 | 1          |
| 0.05753061 | TGFB2, SEMA3C, HEY2                    | 7.58685315 | 1          |
| 0.05753061 | FZD1, SFRP1, SFRP5                     | 7.58685315 | 1          |
| 0.05793089 | ITGB3, ITGAV                           | 33.9585492 | 1          |
| 0.05793089 | ITGB8, ITGAV                           | 33.9585492 | 1          |
| 0.05805829 | RAB32, RAB38                           | 33.8757282 | 1          |
| 0.05805829 | HMGCS1, HMGCS2                         | 33.8757282 | 1          |
| 0.05980317 | HFE, B2M                               | 32.8763636 | 1          |
| 0.05980317 | HFE, B2M                               | 32.8763636 | 1          |
| 0.05980317 | ITGB3, ITGAV                           | 32.8763636 | 1          |
| 0.05980317 | ZEB2, KIT                              | 32.8763636 | 1          |
| 0.05980317 | HFE, B2M                               | 32.8763636 | 1          |
| 0.05980317 | H3F3B, H3F3A                           | 32.8763636 | 1          |
| 0.05980317 | H3F3B, H3F3A                           | 32.8763636 | 1          |
| 0.05980317 | H3F3B, H3F3A                           | 32.8763636 | 1          |
| 0.05980317 | MXRA8, DMD                             | 32.8763636 | 1          |
| 0.05980317 | GAMT, GATM                             | 32.8763636 | 1          |
| 0.05980317 | PDIA3, PDIA4                           | 32.8763636 | 1          |
| 0.06128632 | TGFB2, ITGB3, DAG1, ITGA7, ITGB8, ITGA | 2.48520519 | 0.99999963 |
| 0.06167195 | ARHGEF16, CIB1, SORBS1, EZR            | 4.38351515 | 1          |
| 0.06167195 | NR4A1, POSTN, SFRP1, ZFP36L1           | 4.38351515 | 1          |
| 0.06167195 | SREBF1, TGFB2, RAMP2, PTN              | 4.38351515 | 1          |
| 0.06232491 | NTRK2, RAMP2, TGFB2, ITGB3, HFE, EPH   | 1.56554113 | 1          |
| 0.06240074 | H2-K1, H2-Q4, H2-D1                    | 7.2590846  | 1          |
| 0.06285939 | NTRK2, ANGPT2, FNTA, ARHGEF16, PIK3F   | 3.32114982 | 1          |
| 0.06422459 | CCND1, LAMA4, LAMB1, ITGAV, PIK3R1, I  | 2.45561941 | 0.99999982 |
| 0.06430631 | NTRK2, PTPRZ1, ERBB3, LRRTM1, DAG1, I  | 1.83559726 | 1          |
| 0.06473534 | RAP1A, GPD1, ITPR3, EZR, ZFP36L1       | 3.28763636 | 1          |

|            |                                        |            |            |
|------------|----------------------------------------|------------|------------|
| 0.06575052 | SPARC, VCAM1, CCND1, ALDH1A1, CAT, T   | 2.24795649 | 1          |
| 0.06580377 | CLIC4, ARHGEF26, LECT1                 | 7.04493506 | 1          |
| 0.06580377 | RAB32, TYRP1, RAB38                    | 7.04493506 | 1          |
| 0.06580377 | NTRK2, NOTCH1, PTK2                    | 7.04493506 | 1          |
| 0.06580377 | TGFBR3, NOTCH1, FGFR1                  | 7.04493506 | 1          |
| 0.06580377 | PEX5L, TMED10, RAB31                   | 7.04493506 | 1          |
| 0.06596198 | CST3, CADM1, HMGCS1, H3F3B, KCNA1, I   | 1.82646465 | 1          |
| 0.06714873 | LDHB, NSDHL, GPD1, PHGDH               | 4.23446602 | 1          |
| 0.06761074 | SOX2, TGFBR3, TGFB2, SFRP1, PTN, IFT57 | 2.73969697 | 1          |
| 0.06804    | TMEM59, FAM134B, NPC1, LAMP1, IRGM     | 2.08371319 | 1          |
| 0.06863758 | SREBF1, SPARC, BSG, PEBP1, PIK3R1      | 3.22317291 | 1          |
| 0.06863758 | SREBF1, GRB14, PIK3R1, SORBS1, FOXO1   | 3.22317291 | 1          |
| 0.0691587  | TGFBR3, NOTCH1, CADM1, HMGCS1, CCM     | 2.4224689  | 1          |
| 0.0691587  | WWTR1, FLRT3, LRRTM1, PPP1R1B, LRRC    | 2.4224689  | 1          |
| 0.06948851 | MOCS2, GGH, ALPL                       | 6.80017683 | 0.99999995 |
| 0.07036765 | MYO10, TTYH1, CIB1                     | 6.79170984 | 1          |
| 0.07063437 | GSTA4, MGST1, GSTM5                    | 6.77514563 | 1          |
| 0.07083453 | CYFIP1, CADM1, CADM2, KCNA1, SDC2, L   | 1.47938234 | 1          |
| 0.07086306 | BCAN, ZEB2, MDK, KCNA1, ID4, PEBP1     | 2.70216687 | 1          |
| 0.07167969 | GSTK1, GSTA4, MGST1, FMO1, GSTT1, GS   | 2.67885754 | 0.99999997 |
| 0.07211634 | CST3, FLRT3, MATN4, MATN2              | 4.10954545 | 1          |
| 0.07211634 | CYFIP1, PXN, KIT, VCL                  | 4.10954545 | 1          |
| 0.07211634 | PDIA3, SFRP1, GOS2, ITM2C              | 4.10954545 | 1          |
| 0.07231414 | AFAP1L2, SH3PXD2B, DAG1, PTK2          | 4.10614887 | 1          |
| 0.07265838 | TGFB2, NSDHL, DBI, LGR5, LGR4          | 3.16118881 | 1          |
| 0.0744436  | FABP7, KIT, LGR4                       | 6.57527273 | 1          |
| 0.0744436  | TGFB2, ITGB3, CIB1                     | 6.57527273 | 1          |
| 0.0744436  | NOTCH1, ANGPT2, PTPRZ1                 | 6.57527273 | 1          |
| 0.0744436  | PACSIN3, APOE, SH3D19                  | 6.57527273 | 1          |
| 0.07486389 | PEX5L, KCNJ10, KCNA1, KCNH8, GRIK3, D  | 2.37252109 | 1          |
| 0.07552679 | NTRK2, CTSL, CTNND2, KCNA1, GRIK3, CP  | 2.03751295 | 1          |
| 0.07762102 | TGFBR3, TGFB2, BAMBI, PXN, PTK2, FERN  | 2.63010909 | 1          |
| 0.07765143 | STARD3, NPC1, SCP2, APOE               | 3.98537978 | 1          |
| 0.07919699 | TGFBR3, RAMP2, GFRA3                   | 6.35169903 | 1          |
| 0.08105007 | TGFBR3, FZD1, TGFB2, SEMA3C, HEY2      | 3.04410774 | 1          |
| 0.08112562 | PDIA3, TMEM33, FAM129A, TMBIM6, PIH    | 2.59550239 | 1          |
| 0.08246142 | CLIC4, TTYH2, TTYH1, KCNA1, HFE, GRIK3 | 1.40737858 | 1          |
| 0.08259907 | NR4A1, PAQR6, NR2F1, NR2F2, RXRG       | 3.02461859 | 1          |
| 0.0827819  | FZD1, TGFB2, NOTCH1, TYRP1, H2-K1, H2  | 1.44993389 | 1          |
| 0.08315588 | SNX1, ENPP1, PIK3R1, SORBS1            | 3.87151179 | 1          |
| 0.08329203 | PEX11A, LAMA4, RARRES2, SCD1           | 3.86780749 | 1          |
| 0.08342029 | ELOVL2, ACOT2, ACSBG1                  | 6.16431818 | 1          |
| 0.08342029 | ARPC1B, ARPC1A, IQGAP2                 | 6.16431818 | 1          |

|            |                                        |            |   |
|------------|----------------------------------------|------------|---|
| 0.08342029 | SPARC, CAT, NCAM1                      | 6.16431818 | 1 |
| 0.08342029 | CXCL10, ITGB3, SELK                    | 6.16431818 | 1 |
| 0.08342029 | POSTN, SEMA3E, PIK3R1                  | 6.16431818 | 1 |
| 0.08452304 | SLC35B2, GJA1, NEK6, LPAR1, S100A4, S1 | 1.98582062 | 1 |
| 0.08452304 | TGFB2, SEMA3C, CHL1, FLRT3, LAMB1, N   | 1.98582062 | 1 |
| 0.08581328 | RAB32, RAB38                           | 22.5838188 | 1 |
| 0.08581328 | RAB32, RAB38                           | 22.5838188 | 1 |
| 0.08581328 | PDIA3, TXNDC12                         | 22.5838188 | 1 |
| 0.08581328 | SCP2, DBI                              | 22.5838188 | 1 |
| 0.0863675  | AHNAK, CDH2, ATP1A2, AQP4, EZR         | 2.97882011 | 1 |
| 0.08687302 | FLRT3, LRRTM1, LRRC4, LRRC4C, TRIB1    | 2.9715551  | 1 |
| 0.08708104 | KCNJ10, KCNA1, KCNH8, KCNK13, KCNA6    | 2.54067961 | 1 |
| 0.08773573 | COL14A1, TNC, VWA1                     | 5.99268516 | 1 |
| 0.08773573 | SCP2, PRDX1, ECI2                      | 5.99268516 | 1 |
| 0.08835229 | FMO1, ACADM                            | 21.9175758 | 1 |
| 0.08835229 | NOTCH1, HES5                           | 21.9175758 | 1 |
| 0.08835229 | SFRP1, SFRP5                           | 21.9175758 | 1 |
| 0.08835229 | ACADL, ACADM                           | 21.9175758 | 1 |
| 0.08835229 | HES5, LGR4                             | 21.9175758 | 1 |
| 0.08835229 | LPCAT2, CHPT1                          | 21.9175758 | 1 |
| 0.08835229 | HEY2, EMP2                             | 21.9175758 | 1 |
| 0.08835229 | LPCAT2, DBI                            | 21.9175758 | 1 |
| 0.08835229 | ITGB3, ITGAV                           | 21.9175758 | 1 |
| 0.08835229 | TGFBR3, GJA1                           | 21.9175758 | 1 |
| 0.08835229 | SMOX, SAT1                             | 21.9175758 | 1 |
| 0.08838293 | CXCL10, VCAM1, KIT, ARHGEF16, LPAR1,   | 2.52895105 | 1 |
| 0.08914104 | TGFB2, NOTCH1, CTSL, SOSTDC1           | 3.7572987  | 1 |
| 0.08989788 | SOX2, SFRP1, CCND1, SFRP5, TAX1BP3     | 2.93538961 | 1 |
| 0.08989788 | SOX2, SFRP1, NOTCH1, ID3, FGFR1        | 2.93538961 | 1 |
| 0.0900717  | MARCKSL1, MARCKS, MYO10, PIK3R1, AC    | 1.86130374 | 1 |
| 0.0921342  | SREBF1, NR4A1, GPX1, CCND1, ID4, PSM1  | 2.49693901 | 1 |
| 0.09227489 | NTRK2, WNT6, NOTCH1, ID3, POU3F2, H    | 2.07095204 | 1 |
| 0.09270552 | H3F3B, H3F3A, SOX6                     | 5.80171123 | 1 |
| 0.09270552 | PLP1, VIM, POU3F2                      | 5.80171123 | 1 |
| 0.09270552 | RHBDF1, GPX1, DLGAP1                   | 5.80171123 | 1 |
| 0.09270552 | TGFB2, NOTCH1, HEY2                    | 5.80171123 | 1 |
| 0.09270552 | TGFBR3, TGFB2, NOTCH1                  | 5.80171123 | 1 |
| 0.09270552 | FDPS, HMGC1, HMGC2                     | 5.80171123 | 1 |
| 0.09270552 | ID4, GPR37L1, HES5                     | 5.80171123 | 1 |
| 0.09515686 | CYP2D22, CYP2J6, CYP2J9, FADS1         | 3.65292929 | 1 |
| 0.09515686 | CLIC4, MMP14, NOTCH1, PXN              | 3.65292929 | 1 |
| 0.09574796 | KCNJ10, KCNJ16, ATP1A2, ITPR3, ATP1B2  | 2.45561941 | 1 |
| 0.09596613 | CST3, NOTCH1, NPC1, ITGB3, TXNDC12, N  | 2.46572727 | 1 |

|                                        |            |   |
|----------------------------------------|------------|---|
| 0.09720471 FKBP10, FKBP2, FKBP9        | 5.64595469 | 1 |
| 0.09919126 PRNP, NOTCH1, CASP12, NCAM1 | 3.57181005 | 1 |

| Benjamini  | FDR        |
|------------|------------|
| 4.92E-31   | 4.34E-31   |
| 6.75E-14   | 5.95E-14   |
| 9.38E-14   | 8.27E-14   |
| 1.23E-12   | 1.08E-12   |
| 1.00E-10   | 9.86E-11   |
| 1.28E-11   | 1.12E-11   |
| 6.06E-11   | 5.34E-11   |
| 3.63E-10   | 3.20E-10   |
| 4.09E-10   | 3.60E-10   |
| 2.17E-08   | 2.13E-08   |
| 1.51E-07   | 1.33E-07   |
| 1.53E-07   | 1.35E-07   |
| 3.83E-07   | 3.38E-07   |
| 6.24E-07   | 5.50E-07   |
| 1.35E-05   | 1.32E-05   |
| 1.35E-05   | 1.32E-05   |
| 5.44E-05   | 5.34E-05   |
| 1.68E-05   | 1.63E-05   |
| 1.62E-05   | 1.53E-05   |
| 1.62E-05   | 1.53E-05   |
| 8.68E-06   | 7.65E-06   |
| 1.67E-05   | 1.47E-05   |
| 1.77E-05   | 1.56E-05   |
| 2.31E-05   | 2.03E-05   |
| 3.79E-05   | 3.34E-05   |
| 4.78E-05   | 4.21E-05   |
| 4.97E-05   | 4.38E-05   |
| 1.82E-04   | 1.72E-04   |
| 5.58E-05   | 4.92E-05   |
| 0.00204632 | 0.00200932 |
| 5.20E-04   | 5.06E-04   |
| 7.76E-05   | 6.84E-05   |
| 5.20E-04   | 5.06E-04   |
| 0.00216433 | 0.00212519 |
| 5.20E-04   | 5.06E-04   |
| 5.51E-04   | 5.36E-04   |
| 0.00217061 | 0.00213137 |
| 0.00217061 | 0.00213137 |
| 1.41E-04   | 1.25E-04   |
| 1.48E-04   | 1.30E-04   |
| 1.58E-04   | 1.39E-04   |
| 8.38E-04   | 8.15E-04   |

|            |            |
|------------|------------|
| 0.00323011 | 0.00317171 |
| 1.90E-04   | 1.67E-04   |
| 0.00431919 | 0.00424109 |
| 2.65E-04   | 2.34E-04   |
| 0.00431919 | 0.00424109 |
| 0.00509421 | 0.0050021  |
| 0.00509421 | 0.0050021  |
| 0.00807227 | 0.00792631 |
| 0.00320351 | 0.00311625 |
| 0.00320351 | 0.00311625 |
| 6.82E-04   | 6.01E-04   |
| 0.0088495  | 0.00868949 |
| 0.00308481 | 0.00291416 |
| 8.64E-04   | 7.62E-04   |
| 0.01694467 | 0.01663829 |
| 0.00734395 | 0.00714392 |
| 0.00503986 | 0.00476106 |
| 0.00175637 | 0.00154833 |
| 0.01971339 | 0.01935695 |
| 0.01971339 | 0.01935695 |
| 0.01971339 | 0.01935695 |
| 0.02171235 | 0.02131976 |
| 0.01031864 | 0.01003759 |
| 0.0024028  | 0.00211819 |
| 0.00615613 | 0.00581558 |
| 0.00615613 | 0.00581558 |
| 0.0032207  | 0.00283921 |
| 0.01375278 | 0.01337819 |
| 0.03022187 | 0.02967542 |
| 0.03022187 | 0.02967542 |
| 0.03022187 | 0.02967542 |
| 0.01375278 | 0.01337819 |
| 0.03084696 | 0.03028921 |
| 0.03198524 | 0.03140691 |
| 0.03198524 | 0.03140691 |
| 0.03537081 | 0.03473126 |
| 0.03537081 | 0.03473126 |
| 0.00521824 | 0.00460013 |
| 0.0379612  | 0.03727482 |
| 0.00525706 | 0.00463435 |
| 0.00541898 | 0.00477709 |
| 0.04219621 | 0.04143326 |
| 0.00599467 | 0.0052846  |

|            |            |
|------------|------------|
| 0.00599467 | 0.0052846  |
| 0.04487754 | 0.04406611 |
| 0.02741492 | 0.02666821 |
| 0.00638539 | 0.00562904 |
| 0.02802738 | 0.02726399 |
| 0.00683609 | 0.00602635 |
| 0.02929313 | 0.02849526 |
| 0.05686427 | 0.0558361  |
| 0.05935983 | 0.05828653 |
| 0.0087493  | 0.00771294 |
| 0.0241399  | 0.0228045  |
| 0.06632381 | 0.0651246  |
| 0.06632381 | 0.0651246  |
| 0.07464491 | 0.07329525 |
| 0.07464491 | 0.07329525 |
| 0.0444825  | 0.04327091 |
| 0.08375479 | 0.08224041 |
| 0.01256719 | 0.0110786  |
| 0.01261374 | 0.01111963 |
| 0.03095329 | 0.02924098 |
| 0.08635179 | 0.08479045 |
| 0.08635179 | 0.08479045 |
| 0.05172806 | 0.05031912 |
| 0.01492148 | 0.01315401 |
| 0.05549178 | 0.05398033 |
| 0.09889746 | 0.09710928 |
| 0.01620186 | 0.01428273 |
| 0.10612027 | 0.10420149 |
| 0.10612027 | 0.10420149 |
| 0.05877764 | 0.0571767  |
| 0.05877764 | 0.0571767  |
| 0.01695032 | 0.01494253 |
| 0.03958475 | 0.03739496 |
| 0.01739619 | 0.01533559 |
| 0.06008463 | 0.05844809 |
| 0.03958475 | 0.03739496 |
| 0.01832072 | 0.01615061 |
| 0.1168     | 0.11468812 |
| 0.1168     | 0.11468812 |
| 0.1168     | 0.11468812 |
| 0.06303871 | 0.06132171 |
| 0.01842936 | 0.01624638 |
| 0.01842936 | 0.01624638 |

|            |            |
|------------|------------|
| 0.11852861 | 0.11638548 |
| 0.11852861 | 0.11638548 |
| 0.06546118 | 0.06367819 |
| 0.12398498 | 0.12174318 |
| 0.04617192 | 0.04361773 |
| 0.02144229 | 0.01890243 |
| 0.13575852 | 0.13330384 |
| 0.14026852 | 0.1377323  |
| 0.14373259 | 0.14113374 |
| 0.14561855 | 0.14298559 |
| 0.14561855 | 0.14298559 |
| 0.02605653 | 0.0229701  |
| 0.14930889 | 0.14660921 |
| 0.02705807 | 0.02385301 |
| 0.16428427 | 0.16131382 |
| 0.02869781 | 0.02529852 |
| 0.16734512 | 0.16431932 |
| 0.16734512 | 0.16431932 |
| 0.02937692 | 0.02589719 |
| 0.02996059 | 0.02641173 |
| 0.03049611 | 0.02688381 |
| 0.17785602 | 0.17464017 |
| 0.17785602 | 0.17464017 |
| 0.18027516 | 0.17701557 |
| 0.18027516 | 0.17701557 |
| 0.18027516 | 0.17701557 |
| 0.07789536 | 0.07358625 |
| 0.13095753 | 0.1273906  |
| 0.13095753 | 0.1273906  |
| 0.07789536 | 0.07358625 |
| 0.20226686 | 0.19860964 |
| 0.20949937 | 0.20571138 |
| 0.21064888 | 0.2068401  |
| 0.21766321 | 0.21372761 |
| 0.22479985 | 0.2207352  |
| 0.2266689  | 0.22257046 |
| 0.15506768 | 0.15084405 |
| 0.09114139 | 0.08609953 |
| 0.15506768 | 0.15084405 |
| 0.23451165 | 0.2302714  |
| 0.23451165 | 0.2302714  |
| 0.23451165 | 0.2302714  |
| 0.23451165 | 0.2302714  |



|            |            |
|------------|------------|
| 0.23451165 | 0.2302714  |
| 0.23451165 | 0.2302714  |
| 0.1709738  | 0.16631693 |
| 0.09993783 | 0.09440935 |
| 0.0539758  | 0.04758232 |
| 0.25738627 | 0.25273242 |
| 0.05554045 | 0.04896162 |
| 0.25766675 | 0.25300783 |
| 0.25766675 | 0.25300783 |
| 0.05617329 | 0.04951951 |
| 0.25766675 | 0.25300783 |
| 0.25766675 | 0.25300783 |
| 0.25766675 | 0.25300783 |
| 0.25766675 | 0.25300783 |
| 0.25766675 | 0.25300783 |
| 0.25766675 | 0.25300783 |
| 0.25766675 | 0.25300783 |
| 0.25947244 | 0.25478087 |
| 0.20310632 | 0.19757424 |
| 0.27004735 | 0.26516458 |
| 0.11958313 | 0.11296789 |
| 0.27281958 | 0.26788668 |
| 0.06600918 | 0.05819033 |
| 0.29340933 | 0.28810415 |
| 0.2936818  | 0.28837169 |
| 0.2936818  | 0.28837169 |
| 0.29964467 | 0.29422674 |
| 0.07297087 | 0.0643274  |
| 0.07346031 | 0.06475886 |
| 0.07531271 | 0.06639184 |
| 0.34565182 | 0.33940203 |
| 0.28063655 | 0.27299275 |
| 0.28063655 | 0.27299275 |
| 0.36668713 | 0.36005699 |
| 0.08806379 | 0.07763254 |
| 0.37085266 | 0.36414721 |
| 0.37212111 | 0.36539272 |
| 0.08990472 | 0.07925541 |
| 0.29769217 | 0.28958383 |
| 0.39144082 | 0.38436311 |
| 0.09205744 | 0.08115314 |
| 0.09205744 | 0.08115314 |
| 0.39144082 | 0.38436311 |
| 0.41163777 | 0.40419488 |

|            |            |
|------------|------------|
| 0.19341859 | 0.18271884 |
| 0.42652793 | 0.4188158  |
| 0.32600547 | 0.31712594 |
| 0.429639   | 0.42187062 |
| 0.10520469 | 0.09274309 |
| 0.429639   | 0.42187062 |
| 0.429639   | 0.42187062 |
| 0.429639   | 0.42187062 |
| 0.32600547 | 0.31712594 |
| 0.32600547 | 0.31712594 |
| 0.32600547 | 0.31712594 |
| 0.32600547 | 0.31712594 |
| 0.10971431 | 0.09671854 |
| 0.10971431 | 0.09671854 |
| 0.4401839  | 0.43222486 |
| 0.4401839  | 0.43222486 |
| 0.4401839  | 0.43222486 |
| 0.4401839  | 0.43222486 |
| 0.4401839  | 0.43222486 |
| 0.4401839  | 0.43222486 |
| 0.1126666  | 0.09932113 |
| 0.22833536 | 0.21570404 |
| 0.36501689 | 0.3550748  |
| 0.47129632 | 0.46277473 |
| 0.12007569 | 0.1058526  |
| 0.48888634 | 0.4800467  |
| 0.36606464 | 0.356094   |
| 0.49775869 | 0.48875862 |
| 0.50037569 | 0.49132831 |
| 0.1268598  | 0.11183312 |
| 0.36606464 | 0.356094   |
| 0.12865097 | 0.11341213 |
| 0.36606464 | 0.356094   |
| 0.36606464 | 0.356094   |
| 0.36606464 | 0.356094   |
| 0.51811556 | 0.50874741 |
| 0.52353105 | 0.51406499 |
| 0.36606464 | 0.356094   |
| 0.13320174 | 0.11742386 |
| 0.36606464 | 0.356094   |
| 0.36606464 | 0.356094   |
| 0.53655756 | 0.52685597 |
| 0.53655756 | 0.52685597 |

|            |            |
|------------|------------|
| 0.54258143 | 0.53277092 |
| 0.54258143 | 0.53277092 |
| 0.55665801 | 0.54659298 |
| 0.55665801 | 0.54659298 |
| 0.58915539 | 0.57850277 |
| 0.41925105 | 0.40783176 |
| 0.60368502 | 0.59276969 |
| 0.41925105 | 0.40783176 |
| 0.60493205 | 0.59399417 |
| 0.60515012 | 0.59420829 |
| 0.60515012 | 0.59420829 |
| 0.31056604 | 0.29338579 |
| 0.60560861 | 0.59465849 |
| 0.1681239  | 0.14820945 |
| 0.60560861 | 0.59465849 |
| 0.60560861 | 0.59465849 |
| 0.60560861 | 0.59465849 |
| 0.31056604 | 0.29338579 |
| 0.43914129 | 0.42718025 |
| 0.60606596 | 0.59510757 |
| 0.31056604 | 0.29338579 |
| 0.43914129 | 0.42718025 |
| 0.6221209  | 0.61087222 |
| 0.31077098 | 0.2935794  |
| 0.17803241 | 0.15694429 |
| 0.63969104 | 0.62812467 |
| 0.63969104 | 0.62812467 |
| 0.46459417 | 0.45193985 |
| 0.64783463 | 0.63612101 |
| 0.64783463 | 0.63612101 |
| 0.64783463 | 0.63612101 |
| 0.18928786 | 0.16686652 |
| 0.47591431 | 0.46295167 |
| 0.19466019 | 0.17160249 |
| 0.66587652 | 0.65383668 |
| 0.66587652 | 0.65383668 |
| 0.66587652 | 0.65383668 |
| 0.66587652 | 0.65383668 |
| 0.66587652 | 0.65383668 |
| 0.66587652 | 0.65383668 |
| 0.66587652 | 0.65383668 |
| 0.66587652 | 0.65383668 |
| 0.36650603 | 0.34623123 |

|            |            |
|------------|------------|
| 0.52611209 | 0.51178219 |
| 0.71248018 | 0.6995977  |
| 0.71426378 | 0.70134905 |
| 0.71906107 | 0.7060596  |
| 0.5507803  | 0.53577851 |
| 0.7575651  | 0.74386743 |
| 0.7575651  | 0.74386743 |
| 0.7575651  | 0.74386743 |
| 0.7575651  | 0.74386743 |
| 0.38699525 | 0.365587   |
| 0.76292023 | 0.74912573 |
| 0.76292023 | 0.74912573 |
| 0.76292023 | 0.74912573 |
| 0.59585471 | 0.5796252  |
| 0.38699525 | 0.365587   |
| 0.24196855 | 0.21330713 |
| 0.24196855 | 0.21330713 |
| 0.38699525 | 0.365587   |
| 0.24196855 | 0.21330713 |
| 0.60411032 | 0.58765595 |
| 0.24196855 | 0.21330713 |
| 0.38699525 | 0.365587   |
| 0.81198497 | 0.79730333 |
| 0.24196855 | 0.21330713 |
| 0.24196855 | 0.21330713 |
| 0.24196855 | 0.21330713 |
| 0.60839797 | 0.59182682 |
| 0.81198497 | 0.79730333 |
| 0.81198497 | 0.79730333 |
| 0.60839797 | 0.59182682 |
| 0.8140354  | 0.79931668 |
| 0.24405984 | 0.2151507  |
| 0.82173126 | 0.80687338 |
| 0.82173126 | 0.80687338 |
| 0.82173126 | 0.80687338 |
| 0.82173126 | 0.80687338 |
| 0.82173126 | 0.80687338 |
| 0.82173126 | 0.80687338 |
| 0.63088444 | 0.61370082 |
| 0.82173126 | 0.80687338 |
| 0.82173126 | 0.80687338 |
| 0.40799515 | 0.38542521 |
| 0.25536623 | 0.22511784 |



|            |            |
|------------|------------|
| 0.89378489 | 0.8776242  |
| 0.89378489 | 0.8776242  |
| 0.89378489 | 0.8776242  |
| 0.89378489 | 0.8776242  |
| 0.89378489 | 0.8776242  |
| 0.89378489 | 0.8776242  |
| 0.89378489 | 0.8776242  |
| 0.75031412 | 0.72987755 |
| 0.90980626 | 0.89335589 |
| 0.90980626 | 0.89335589 |
| 0.90980626 | 0.89335589 |
| 0.90980626 | 0.89335589 |
| 0.90980626 | 0.89335589 |
| 0.90980626 | 0.89335589 |
| 0.51030621 | 0.48207651 |
| 0.32392039 | 0.28555169 |
| 0.77798713 | 0.75679682 |
| 0.32392039 | 0.28555169 |
| 0.92772413 | 0.91094978 |
| 0.51044627 | 0.48220881 |
| 0.93064416 | 0.91381701 |
| 0.93064416 | 0.91381701 |
| 0.93064416 | 0.91381701 |
| 0.78527044 | 0.76388175 |
| 0.93319534 | 0.91632207 |
| 0.93833562 | 0.92136941 |
| 0.93833562 | 0.92136941 |
| 0.93833562 | 0.92136941 |
| 0.93833562 | 0.92136941 |
| 0.93926452 | 0.92228151 |
| 0.34181711 | 0.30132852 |
| 0.96936848 | 0.95184115 |
| 0.81877417 | 0.79647293 |
| 0.81877417 | 0.79647293 |
| 0.99695217 | 0.9789261  |
| 0.99695217 | 0.9789261  |
| 0.99695217 | 0.9789261  |
| 0.81877417 | 0.79647293 |
| 0.81877417 | 0.79647293 |
| 0.81877417 | 0.79647293 |
| 0.99695217 | 0.9789261  |
| 0.99695217 | 0.9789261  |
| 0.99695217 | 0.9789261  |



|            |            |
|------------|------------|
| 0.8922004  | 0.86789922 |
| 0.66599847 | 0.629156   |



| Category         | Term                                                   | Count |
|------------------|--------------------------------------------------------|-------|
| GOTERM_CC_DIRECT | GO:0070062~extracellular exosome                       | 154   |
| GOTERM_CC_DIRECT | GO:0016020~membrane                                    | 286   |
| GOTERM_CC_DIRECT | GO:0005737~cytoplasm                                   | 256   |
| GOTERM_BP_DIRECT | GO:0042552~myelination                                 | 17    |
| GOTERM_CC_DIRECT | GO:0048471~perinuclear region of cytoplasm             | 54    |
| GOTERM_CC_DIRECT | GO:0043209~myelin sheath                               | 26    |
| GOTERM_CC_DIRECT | GO:0005925~focal adhesion                              | 36    |
| GOTERM_CC_DIRECT | GO:0005856~cytoskeleton                                | 65    |
| GOTERM_CC_DIRECT | GO:0005913~cell-cell adherens junction                 | 30    |
| KEGG_PATHWAY     | mmu05100:Bacterial invasion of epithelial cells        | 15    |
| GOTERM_MF_DIRECT | GO:0003779~actin binding                               | 30    |
| GOTERM_MF_DIRECT | GO:0098641~cadherin binding involved in cell-cell adh  | 26    |
| GOTERM_MF_DIRECT | GO:0051015~actin filament binding                      | 17    |
| GOTERM_CC_DIRECT | GO:0033270~paranode region of axon                     | 7     |
| GOTERM_BP_DIRECT | GO:0007155~cell adhesion                               | 34    |
| KEGG_PATHWAY     | mmu04810:Regulation of actin cytoskeleton              | 21    |
| GOTERM_CC_DIRECT | GO:0005829~cytosol                                     | 82    |
| GOTERM_MF_DIRECT | GO:0019911~structural constituent of myelin sheath     | 5     |
| GOTERM_MF_DIRECT | GO:0005515~protein binding                             | 158   |
| GOTERM_BP_DIRECT | GO:0098609~cell-cell adhesion                          | 19    |
| GOTERM_CC_DIRECT | GO:0005783~endoplasmic reticulum                       | 64    |
| GOTERM_CC_DIRECT | GO:0030054~cell junction                               | 40    |
| GOTERM_CC_DIRECT | GO:0043220~Schmidt-Lanterman incisure                  | 6     |
| GOTERM_CC_DIRECT | GO:0030175~filopodium                                  | 11    |
| KEGG_PATHWAY     | mmu04360:Axon guidance                                 | 14    |
| KEGG_PATHWAY     | mmu04510:Focal adhesion                                | 18    |
| GOTERM_BP_DIRECT | GO:0006629~lipid metabolic process                     | 29    |
| GOTERM_BP_DIRECT | GO:0016477~cell migration                              | 17    |
| KEGG_PATHWAY     | mmu04915:Estrogen signaling pathway                    | 12    |
| GOTERM_MF_DIRECT | GO:0005178~integrin binding                            | 12    |
| GOTERM_BP_DIRECT | GO:0007399~nervous system development                  | 25    |
| GOTERM_CC_DIRECT | GO:0030864~cortical actin cytoskeleton                 | 8     |
| KEGG_PATHWAY     | mmu04520:Adherens junction                             | 10    |
| GOTERM_CC_DIRECT | GO:0030424~axon                                        | 24    |
| GOTERM_CC_DIRECT | GO:0043005~neuron projection                           | 26    |
| GOTERM_CC_DIRECT | GO:0005794~Golgi apparatus                             | 54    |
| KEGG_PATHWAY     | mmu04015:Rap1 signaling pathway                        | 17    |
| GOTERM_CC_DIRECT | GO:0015629~actin cytoskeleton                          | 16    |
| GOTERM_CC_DIRECT | GO:0042470~melanosome                                  | 11    |
| GOTERM_BP_DIRECT | GO:0046627~negative regulation of insulin receptor sig | 7     |
| GOTERM_BP_DIRECT | GO:0008202~steroid metabolic process                   | 10    |
| GOTERM_BP_DIRECT | GO:0030335~positive regulation of cell migration       | 16    |

|                  |                                                     |    |
|------------------|-----------------------------------------------------|----|
| KEGG_PATHWAY     | mmu05205:Proteoglycans in cancer                    | 16 |
| GOTERM_MF_DIRECT | GO:0008289~lipid binding                            | 19 |
| GOTERM_BP_DIRECT | GO:0071277~cellular response to calcium ion         | 8  |
| GOTERM_BP_DIRECT | GO:0048843~negative regulation of axon extension in | 6  |
| GOTERM_BP_DIRECT | GO:0016126~sterol biosynthetic process              | 6  |
| KEGG_PATHWAY     | mmu04512:ECM-receptor interaction                   | 10 |
| GOTERM_BP_DIRECT | GO:0030148~sphingolipid biosynthetic process        | 6  |
| GOTERM_CC_DIRECT | GO:0005768~endosome                                 | 29 |
| GOTERM_CC_DIRECT | GO:0005789~endoplasmic reticulum membrane           | 35 |
| GOTERM_CC_DIRECT | GO:0009986~cell surface                             | 32 |
| GOTERM_BP_DIRECT | GO:0007519~skeletal muscle tissue development       | 8  |
| KEGG_PATHWAY     | mmu04921:Oxytocin signaling pathway                 | 13 |
| GOTERM_BP_DIRECT | GO:0051726~regulation of cell cycle                 | 11 |
| GOTERM_CC_DIRECT | GO:0005903~brush border                             | 9  |
| GOTERM_BP_DIRECT | GO:0042326~negative regulation of phosphorylation   | 5  |
| GOTERM_CC_DIRECT | GO:0045202~synapse                                  | 27 |
| GOTERM_CC_DIRECT | GO:0043296~apical junction complex                  | 5  |
| KEGG_PATHWAY     | mmu05200:Pathways in cancer                         | 23 |
| GOTERM_CC_DIRECT | GO:0030027~lamellipodium                            | 13 |
| KEGG_PATHWAY     | mmu04514:Cell adhesion molecules (CAMs)             | 13 |
| GOTERM_CC_DIRECT | GO:0045121~membrane raft                            | 17 |
| GOTERM_CC_DIRECT | GO:0014069~postsynaptic density                     | 16 |
| GOTERM_BP_DIRECT | GO:0007264~small GTPase mediated signal transducti  | 16 |
| KEGG_PATHWAY     | mmu00330:Arginine and proline metabolism            | 7  |
| GOTERM_MF_DIRECT | GO:0030215~semaphorin receptor binding              | 5  |
| GOTERM_BP_DIRECT | GO:0051017~actin filament bundle assembly           | 6  |
| KEGG_PATHWAY     | mmu05412:Arrhythmogenic right ventricular cardiomy  | 8  |
| GOTERM_BP_DIRECT | GO:0042493~response to drug                         | 20 |
| KEGG_PATHWAY     | mmu04540:Gap junction                               | 9  |
| GOTERM_CC_DIRECT | GO:0000139~Golgi membrane                           | 22 |
| GOTERM_CC_DIRECT | GO:0005911~cell-cell junction                       | 14 |
| GOTERM_BP_DIRECT | GO:0010038~response to metal ion                    | 4  |
| GOTERM_CC_DIRECT | GO:0030425~dendrite                                 | 25 |
| GOTERM_CC_DIRECT | GO:0045177~apical part of cell                      | 10 |
| GOTERM_CC_DIRECT | GO:0005764~lysosome                                 | 19 |
| GOTERM_BP_DIRECT | GO:0007229~integrin-mediated signaling pathway      | 9  |
| GOTERM_CC_DIRECT | GO:0043218~compact myelin                           | 3  |
| KEGG_PATHWAY     | mmu04725:Cholinergic synapse                        | 10 |
| KEGG_PATHWAY     | mmu04978:Mineral absorption                         | 6  |
| KEGG_PATHWAY     | mmu04010:MAPK signaling pathway                     | 16 |
| GOTERM_MF_DIRECT | GO:0004860~protein kinase inhibitor activity        | 7  |
| GOTERM_BP_DIRECT | GO:0001934~positive regulation of protein phosphory | 13 |
| GOTERM_CC_DIRECT | GO:0005802~trans-Golgi network                      | 12 |

|                  |                                                      |    |
|------------------|------------------------------------------------------|----|
| GOTERM_BP_DIRECT | GO:0050919~negative chemotaxis                       | 5  |
| GOTERM_BP_DIRECT | GO:0007160~cell-matrix adhesion                      | 8  |
| GOTERM_CC_DIRECT | GO:0043025~neuronal cell body                        | 26 |
| GOTERM_BP_DIRECT | GO:0030036~actin cytoskeleton organization           | 11 |
| KEGG_PATHWAY     | mmu05132:Salmonella infection                        | 8  |
| GOTERM_MF_DIRECT | GO:0005096~GTPase activator activity                 | 15 |
| GOTERM_MF_DIRECT | GO:0045499~chemorepellent activity                   | 5  |
| GOTERM_CC_DIRECT | GO:0042995~cell projection                           | 32 |
| GOTERM_CC_DIRECT | GO:0044295~axonal growth cone                        | 5  |
| GOTERM_BP_DIRECT | GO:0007420~brain development                         | 14 |
| GOTERM_CC_DIRECT | GO:0033010~paranodal junction                        | 3  |
| GOTERM_MF_DIRECT | GO:0019904~protein domain specific binding           | 17 |
| GOTERM_BP_DIRECT | GO:0043066~negative regulation of apoptotic process  | 27 |
| GOTERM_BP_DIRECT | GO:0030308~negative regulation of cell growth        | 10 |
| GOTERM_BP_DIRECT | GO:0035556~intracellular signal transduction         | 21 |
| GOTERM_BP_DIRECT | GO:0006915~apoptotic process                         | 27 |
| GOTERM_BP_DIRECT | GO:0043123~positive regulation of I-kappaB kinase/NF | 11 |
| KEGG_PATHWAY     | mmu04723:Retrograde endocannabinoid signaling        | 9  |
| GOTERM_BP_DIRECT | GO:0007266~Rho protein signal transduction           | 6  |
| GOTERM_BP_DIRECT | GO:0051260~protein homooligomerization               | 13 |
| GOTERM_CC_DIRECT | GO:0005741~mitochondrial outer membrane              | 11 |
| GOTERM_MF_DIRECT | GO:0017049~GTP-Rho binding                           | 4  |
| KEGG_PATHWAY     | mmu04666:Fc gamma R-mediated phagocytosis            | 8  |
| KEGG_PATHWAY     | mmu05145:Toxoplasmosis                               | 9  |
| GOTERM_BP_DIRECT | GO:0009636~response to toxic substance               | 8  |
| GOTERM_BP_DIRECT | GO:0010942~positive regulation of cell death         | 6  |
| GOTERM_BP_DIRECT | GO:0008285~negative regulation of cell proliferation | 20 |
| KEGG_PATHWAY     | mmu04720:Long-term potentiation                      | 7  |
| GOTERM_BP_DIRECT | GO:0035338~long-chain fatty-acyl-CoA biosynthetic pr | 3  |
| GOTERM_BP_DIRECT | GO:0030913~paranodal junction assembly               | 3  |
| GOTERM_BP_DIRECT | GO:0001755~neural crest cell migration               | 6  |
| GOTERM_BP_DIRECT | GO:0006695~cholesterol biosynthetic process          | 5  |
| GOTERM_BP_DIRECT | GO:0008203~cholesterol metabolic process             | 8  |
| GOTERM_CC_DIRECT | GO:0005921~gap junction                              | 5  |
| KEGG_PATHWAY     | mmu04912:GnRH signaling pathway                      | 8  |
| KEGG_PATHWAY     | mmu04014:Ras signaling pathway                       | 14 |
| GOTERM_BP_DIRECT | GO:0051591~response to cAMP                          | 6  |
| GOTERM_CC_DIRECT | GO:0016459~myosin complex                            | 6  |
| KEGG_PATHWAY     | mmu04530:Tight junction                              | 8  |
| GOTERM_BP_DIRECT | GO:0071526~semaphorin-plexin signaling pathway       | 5  |
| GOTERM_BP_DIRECT | GO:0010976~positive regulation of neuron projection  | 10 |
| GOTERM_BP_DIRECT | GO:0016601~Rac protein signal transduction           | 4  |
| KEGG_PATHWAY     | mmu05218:Melanoma                                    | 7  |

|                  |                                                        |    |
|------------------|--------------------------------------------------------|----|
| GOTERM_BP_DIRECT | GO:0019367~fatty acid elongation, saturated fatty acid | 3  |
| GOTERM_BP_DIRECT | GO:0034625~fatty acid elongation, monounsaturated      | 3  |
| GOTERM_BP_DIRECT | GO:0034626~fatty acid elongation, polyunsaturated      | 3  |
| GOTERM_BP_DIRECT | GO:0031175~neuron projection development               | 10 |
| GOTERM_MF_DIRECT | GO:0102336~3-oxo-arachidoyl-CoA synthase activity      | 3  |
| GOTERM_MF_DIRECT | GO:0102337~3-oxo-cerotoyl-CoA synthase activity        | 3  |
| GOTERM_MF_DIRECT | GO:0102338~3-oxo-lignoceronyl-CoA synthase activity    | 3  |
| GOTERM_MF_DIRECT | GO:0009922~fatty acid elongase activity                | 3  |
| GOTERM_BP_DIRECT | GO:0016192~vesicle-mediated transport                  | 13 |
| KEGG_PATHWAY     | mmu04724:Glutamatergic synapse                         | 9  |
| GOTERM_CC_DIRECT | GO:0005604~basement membrane                           | 8  |
| GOTERM_CC_DIRECT | GO:0005938~cell cortex                                 | 10 |
| GOTERM_CC_DIRECT | GO:0005874~microtubule                                 | 17 |
| GOTERM_BP_DIRECT | GO:0022409~positive regulation of cell-cell adhesion   | 4  |
| GOTERM_CC_DIRECT | GO:0005902~microvillus                                 | 7  |
| GOTERM_MF_DIRECT | GO:0017124~SH3 domain binding                          | 9  |
| KEGG_PATHWAY     | mmu05133:Pertussis                                     | 7  |
| KEGG_PATHWAY     | mmu04670:Leukocyte transendothelial migration          | 9  |
| GOTERM_BP_DIRECT | GO:0032287~peripheral nervous system myelin mainte     | 3  |
| GOTERM_BP_DIRECT | GO:0071679~commissural neuron axon guidance            | 3  |
| GOTERM_BP_DIRECT | GO:0051412~response to corticosterone                  | 4  |
| GOTERM_CC_DIRECT | GO:0043197~dendritic spine                             | 10 |
| KEGG_PATHWAY     | mmu04713:Circadian entrainment                         | 8  |
| GOTERM_CC_DIRECT | GO:0043204~perikaryon                                  | 10 |
| KEGG_PATHWAY     | mmu04916:Melanogenesis                                 | 8  |
| GOTERM_BP_DIRECT | GO:0031668~cellular response to extracellular stimulu  | 4  |
| GOTERM_CC_DIRECT | GO:0035748~myelin sheath abaxonal region               | 3  |
| GOTERM_CC_DIRECT | GO:0030056~hemidesmosome                               | 3  |
| KEGG_PATHWAY     | mmu04071:Sphingolipid signaling pathway                | 9  |
| KEGG_PATHWAY     | mmu05231:Choline metabolism in cancer                  | 8  |
| GOTERM_BP_DIRECT | GO:0071456~cellular response to hypoxia                | 8  |
| GOTERM_BP_DIRECT | GO:0051898~negative regulation of protein kinase B si  | 5  |
| GOTERM_MF_DIRECT | GO:0042803~protein homodimerization activity           | 33 |
| GOTERM_BP_DIRECT | GO:0042759~long-chain fatty acid biosynthetic proces   | 3  |
| GOTERM_BP_DIRECT | GO:0030042~actin filament depolymerization             | 3  |
| GOTERM_MF_DIRECT | GO:0047372~acylglycerol lipase activity                | 3  |
| GOTERM_BP_DIRECT | GO:0007010~cytoskeleton organization                   | 8  |
| GOTERM_CC_DIRECT | GO:0030496~midbody                                     | 9  |
| KEGG_PATHWAY     | mmu04960:Aldosterone-regulated sodium reabsorptic      | 5  |
| GOTERM_CC_DIRECT | GO:0005765~lysosomal membrane                          | 13 |
| GOTERM_CC_DIRECT | GO:0005770~late endosome                               | 9  |
| GOTERM_CC_DIRECT | GO:0005923~bicellular tight junction                   | 9  |
| GOTERM_CC_DIRECT | GO:0031674~I band                                      | 4  |

|                  |                                                       |     |
|------------------|-------------------------------------------------------|-----|
| KEGG_PATHWAY     | mmu04270:Vascular smooth muscle contraction           | 9   |
| GOTERM_MF_DIRECT | GO:0048365~Rac GTPase binding                         | 5   |
| GOTERM_BP_DIRECT | GO:0001822~kidney development                         | 9   |
| GOTERM_CC_DIRECT | GO:0005886~plasma membrane                            | 152 |
| GOTERM_BP_DIRECT | GO:0010811~positive regulation of cell-substrate adhe | 5   |
| KEGG_PATHWAY     | mmu04730:Long-term depression                         | 6   |
| GOTERM_MF_DIRECT | GO:0000982~transcription factor activity, RNA polyme  | 4   |
| GOTERM_CC_DIRECT | GO:0044754~autolysosome                               | 3   |
| KEGG_PATHWAY     | mmu05414:Dilated cardiomyopathy                       | 7   |
| GOTERM_CC_DIRECT | GO:0008305~integrin complex                           | 4   |
| GOTERM_BP_DIRECT | GO:0008542~visual learning                            | 6   |
| GOTERM_BP_DIRECT | GO:0071404~cellular response to low-density lipoprot  | 3   |
| KEGG_PATHWAY     | mmu04611:Platelet activation                          | 9   |
| GOTERM_BP_DIRECT | GO:0045860~positive regulation of protein kinase acti | 6   |
| GOTERM_CC_DIRECT | GO:0031902~late endosome membrane                     | 7   |
| KEGG_PATHWAY     | mmu04144:Endocytosis                                  | 14  |
| GOTERM_BP_DIRECT | GO:0001525~angiogenesis                               | 13  |
| GOTERM_BP_DIRECT | GO:0043524~negative regulation of neuron apoptotic    | 10  |
| GOTERM_BP_DIRECT | GO:0010033~response to organic substance              | 6   |
| KEGG_PATHWAY     | mmu05210:Colorectal cancer                            | 6   |
| KEGG_PATHWAY     | mmu05140:Leishmaniasis                                | 6   |
| GOTERM_CC_DIRECT | GO:0031982~vesicle                                    | 10  |
| GOTERM_BP_DIRECT | GO:0051781~positive regulation of cell division       | 5   |
| GOTERM_CC_DIRECT | GO:0001725~stress fiber                               | 6   |
| GOTERM_MF_DIRECT | GO:0019901~protein kinase binding                     | 20  |
| GOTERM_BP_DIRECT | GO:0016242~negative regulation of macroautophagy      | 3   |
| KEGG_PATHWAY     | mmu04012:ErbB signaling pathway                       | 7   |
| KEGG_PATHWAY     | mmu04727:GABAergic synapse                            | 7   |
| GOTERM_MF_DIRECT | GO:0008270~zinc ion binding                           | 41  |
| GOTERM_CC_DIRECT | GO:0031234~extrinsic component of cytoplasmic side    | 6   |
| GOTERM_BP_DIRECT | GO:0031032~actomyosin structure organization          | 4   |
| GOTERM_BP_DIRECT | GO:2001243~negative regulation of intrinsic apoptotic | 4   |
| KEGG_PATHWAY     | mmu04151:PI3K-Akt signaling pathway                   | 17  |
| GOTERM_BP_DIRECT | GO:0043525~positive regulation of neuron apoptotic p  | 6   |
| GOTERM_BP_DIRECT | GO:0019538~protein metabolic process                  | 3   |
| GOTERM_BP_DIRECT | GO:0042761~very long-chain fatty acid biosynthetic pr | 3   |
| GOTERM_BP_DIRECT | GO:0008210~estrogen metabolic process                 | 3   |
| GOTERM_MF_DIRECT | GO:0044548~S100 protein binding                       | 3   |
| GOTERM_MF_DIRECT | GO:0017166~vinculin binding                           | 3   |
| GOTERM_MF_DIRECT | GO:0004861~cyclin-dependent protein serine/threonin   | 3   |
| GOTERM_MF_DIRECT | GO:0032403~protein complex binding                    | 17  |
| GOTERM_CC_DIRECT | GO:0071944~cell periphery                             | 6   |
| GOTERM_MF_DIRECT | GO:0019900~kinase binding                             | 7   |



|                  |                                                         |    |
|------------------|---------------------------------------------------------|----|
| GOTERM_CC_DIRECT | GO:0001726~ruffle                                       | 7  |
| GOTERM_BP_DIRECT | GO:2000378~negative regulation of reactive oxygen sp    | 4  |
| GOTERM_BP_DIRECT | GO:0046686~response to cadmium ion                      | 4  |
| GOTERM_BP_DIRECT | GO:0060291~long-term synaptic potentiation              | 5  |
| KEGG_PATHWAY     | mmu05216:Thyroid cancer                                 | 4  |
| GOTERM_CC_DIRECT | GO:0010008~endosome membrane                            | 8  |
| GOTERM_BP_DIRECT | GO:1900181~negative regulation of protein localizatio   | 3  |
| GOTERM_CC_DIRECT | GO:0005578~proteinaceous extracellular matrix           | 15 |
| GOTERM_MF_DIRECT | GO:0008432~JUN kinase binding                           | 3  |
| GOTERM_MF_DIRECT | GO:0030898~actin-dependent ATPase activity              | 3  |
| KEGG_PATHWAY     | mmu04062:Chemokine signaling pathway                    | 11 |
| GOTERM_BP_DIRECT | GO:0007611~learning or memory                           | 5  |
| KEGG_PATHWAY     | mmu04971:Gastric acid secretion                         | 6  |
| GOTERM_BP_DIRECT | GO:0006633~fatty acid biosynthetic process              | 6  |
| GOTERM_MF_DIRECT | GO:0008017~microtubule binding                          | 11 |
| KEGG_PATHWAY     | mmu05161:Hepatitis B                                    | 9  |
| GOTERM_BP_DIRECT | GO:0007411~axon guidance                                | 9  |
| GOTERM_CC_DIRECT | GO:0071682~endocytic vesicle lumen                      | 2  |
| GOTERM_CC_DIRECT | GO:0097038~perinuclear endoplasmic reticulum            | 3  |
| GOTERM_CC_DIRECT | GO:0031143~pseudopodium                                 | 3  |
| GOTERM_CC_DIRECT | GO:0043231~intracellular membrane-bounded organe        | 29 |
| GOTERM_MF_DIRECT | GO:0001540~beta-amyloid binding                         | 4  |
| GOTERM_BP_DIRECT | GO:0006682~galactosylceramide biosynthetic process      | 2  |
| GOTERM_BP_DIRECT | GO:0006601~creatine biosynthetic process                | 2  |
| GOTERM_BP_DIRECT | GO:1902746~regulation of lens fiber cell differentiatio | 2  |
| GOTERM_MF_DIRECT | GO:0008396~oxysterol 7-alpha-hydroxylase activity       | 2  |
| GOTERM_BP_DIRECT | GO:0071850~mitotic cell cycle arrest                    | 3  |
| GOTERM_BP_DIRECT | GO:0070498~interleukin-1-mediated signaling pathwa      | 3  |
| GOTERM_BP_DIRECT | GO:0007179~transforming growth factor beta recepto      | 6  |
| KEGG_PATHWAY     | mmu05213:Endometrial cancer                             | 5  |
| GOTERM_MF_DIRECT | GO:0008201~heparin binding                              | 9  |
| GOTERM_BP_DIRECT | GO:0090090~negative regulation of canonical Wnt sig     | 7  |
| GOTERM_CC_DIRECT | GO:0032587~ruffle membrane                              | 6  |
| GOTERM_BP_DIRECT | GO:0031643~positive regulation of myelination           | 3  |
| GOTERM_BP_DIRECT | GO:0033627~cell adhesion mediated by integrin           | 3  |
| GOTERM_BP_DIRECT | GO:0006636~unsaturated fatty acid biosynthetic proce    | 3  |
| GOTERM_BP_DIRECT | GO:0043149~stress fiber assembly                        | 3  |
| GOTERM_CC_DIRECT | GO:0005635~nuclear envelope                             | 9  |
| GOTERM_MF_DIRECT | GO:0016757~transferase activity, transferring glycosyl  | 11 |
| GOTERM_BP_DIRECT | GO:0007616~long-term memory                             | 4  |
| GOTERM_CC_DIRECT | GO:0030426~growth cone                                  | 9  |
| GOTERM_BP_DIRECT | GO:0043410~positive regulation of MAPK cascade          | 7  |
| GOTERM_CC_DIRECT | GO:0033268~node of Ranvier                              | 3  |

|                  |                                                      |    |
|------------------|------------------------------------------------------|----|
| GOTERM_MF_DIRECT | GO:0003774~motor activity                            | 6  |
| GOTERM_BP_DIRECT | GO:0031103~axon regeneration                         | 3  |
| GOTERM_BP_DIRECT | GO:0022011~myelination in peripheral nervous system  | 3  |
| GOTERM_BP_DIRECT | GO:0009617~response to bacterium                     | 4  |
| GOTERM_MF_DIRECT | GO:0019899~enzyme binding                            | 17 |
| KEGG_PATHWAY     | mmu05416:Viral myocarditis                           | 6  |
| KEGG_PATHWAY     | mmu05410:Hypertrophic cardiomyopathy (HCM)           | 6  |
| GOTERM_BP_DIRECT | GO:0009408~response to heat                          | 5  |
| GOTERM_BP_DIRECT | GO:0007050~cell cycle arrest                         | 6  |
| GOTERM_MF_DIRECT | GO:0030544~Hsp70 protein binding                     | 4  |
| GOTERM_BP_DIRECT | GO:0018105~peptidyl-serine phosphorylation           | 8  |
| GOTERM_BP_DIRECT | GO:0006665~sphingolipid metabolic process            | 4  |
| GOTERM_CC_DIRECT | GO:0044291~cell-cell contact zone                    | 3  |
| GOTERM_MF_DIRECT | GO:0017048~Rho GTPase binding                        | 4  |
| KEGG_PATHWAY     | mmu04726:Serotonergic synapse                        | 8  |
| GOTERM_BP_DIRECT | GO:0007015~actin filament organization               | 6  |
| GOTERM_BP_DIRECT | GO:0030048~actin filament-based movement             | 3  |
| GOTERM_BP_DIRECT | GO:0048193~Golgi vesicle transport                   | 3  |
| GOTERM_BP_DIRECT | GO:0042692~muscle cell differentiation               | 3  |
| GOTERM_BP_DIRECT | GO:0008654~phospholipid biosynthetic process         | 5  |
| KEGG_PATHWAY     | mmu01130:Biosynthesis of antibiotics                 | 11 |
| GOTERM_CC_DIRECT | GO:0019898~extrinsic component of membrane           | 6  |
| GOTERM_BP_DIRECT | GO:0043065~positive regulation of apoptotic process  | 15 |
| GOTERM_BP_DIRECT | GO:0019065~receptor-mediated endocytosis of virus k  | 2  |
| GOTERM_BP_DIRECT | GO:2000544~regulation of endothelial cell chemotaxis | 2  |
| GOTERM_BP_DIRECT | GO:0061084~negative regulation of protein refolding  | 2  |
| GOTERM_BP_DIRECT | GO:0032290~peripheral nervous system myelin forma    | 2  |
| GOTERM_BP_DIRECT | GO:0006598~polyamine catabolic process               | 2  |
| GOTERM_MF_DIRECT | GO:0031871~proteinase activated receptor binding     | 2  |
| GOTERM_MF_DIRECT | GO:0035373~chondroitin sulfate proteoglycan binding  | 2  |
| GOTERM_CC_DIRECT | GO:0005739~mitochondrion                             | 57 |
| GOTERM_CC_DIRECT | GO:0043679~axon terminus                             | 6  |
| GOTERM_MF_DIRECT | GO:0019003~GDP binding                               | 5  |
| GOTERM_BP_DIRECT | GO:0021762~substantia nigra development              | 4  |
| GOTERM_BP_DIRECT | GO:0007605~sensory perception of sound               | 8  |
| GOTERM_BP_DIRECT | GO:0006882~cellular zinc ion homeostasis             | 3  |
| GOTERM_MF_DIRECT | GO:0051393~alpha-actinin binding                     | 3  |
| KEGG_PATHWAY     | mmu04022:cGMP-PKG signaling pathway                  | 9  |
| KEGG_PATHWAY     | mmu05166:HTLV-I infection                            | 13 |
| GOTERM_BP_DIRECT | GO:0008360~regulation of cell shape                  | 8  |
| GOTERM_MF_DIRECT | GO:0030674~protein binding, bridging                 | 5  |
| GOTERM_BP_DIRECT | GO:0006694~steroid biosynthetic process              | 5  |
| GOTERM_BP_DIRECT | GO:0007154~cell communication                        | 4  |

|                  |                                                     |    |
|------------------|-----------------------------------------------------|----|
| GOTERM_CC_DIRECT | GO:0016234~inclusion body                           | 3  |
| GOTERM_BP_DIRECT | GO:0009612~response to mechanical stimulus          | 5  |
| GOTERM_BP_DIRECT | GO:0034599~cellular response to oxidative stress    | 5  |
| GOTERM_BP_DIRECT | GO:0031116~positive regulation of microtubule polym | 3  |
| GOTERM_BP_DIRECT | GO:0043409~negative regulation of MAPK cascade      | 3  |
| GOTERM_BP_DIRECT | GO:0031589~cell-substrate adhesion                  | 3  |
| GOTERM_MF_DIRECT | GO:0031434~mitogen-activated protein kinase kinase  | 3  |
| KEGG_PATHWAY     | mmu00100:Steroid biosynthesis                       | 3  |
| GOTERM_CC_DIRECT | GO:0016323~basolateral plasma membrane              | 10 |



| PValue   | Genes                                   | Fold Enrichment | Bonferroni |
|----------|-----------------------------------------|-----------------|------------|
| 6.03E-21 | GLTP, SEMA5A, SPON2, CYFIP1, NDUFA1:    | 2.13251693      | 2.52E-18   |
| 2.00E-18 | EPHB6, FAAH, PLEKHB1, LDLRAD3, ZDHH     | 1.51330081      | 8.38E-16   |
| 2.90E-12 | GLTP, CYFIP1, RPL3, 1810011O10RIK, PLE  | 1.42953275      | 1.21E-09   |
| 3.98E-12 | EGR2, GAL3ST1, UGT8A, DHH, PLLP, NAB:   | 10.3083166      | 8.71E-09   |
| 8.02E-12 | ITGB1, CYFIP1, CDKN1A, PLEKHF1, AATK,   | 2.88948761      | 3.35E-09   |
| 7.74E-11 | CNP, PEBP1, ITPR3, NDRG1, LDHB, GJC3,   | 5.014242        | 3.23E-08   |
| 5.80E-10 | ITGB1, CYFIP1, RPL3, CD151, ITGB5, CSRP | 3.40925051      | 2.42E-07   |
| 8.18E-09 | ARPC1A, FMN2, PPP1R9A, TUBA1B, SIPA:    | 2.16247633      | 3.42E-06   |
| 1.02E-08 | ITGB1, DOCK9, SLC3A2, CAPG, BZW2, ND    | 3.51534006      | 4.26E-06   |
| 2.61E-08 | SHC4, ITGB1, SEPT11, CAV2, CAV1, ARPC:  | 6.81584544      | 5.89E-06   |
| 7.98E-08 | ITGB1, CYFIP1, GMFB, ARPC1A, CAPG, FM   | 3.1927042       | 5.23E-05   |
| 2.80E-07 | ITGB1, DOCK9, SLC3A2, CAPG, BZW2, ND    | 3.35214869      | 1.84E-04   |
| 7.87E-07 | CYFIP1, ARPC1A, SHROOM2, ARPC5, PPP:    | 4.63264605      | 5.16E-04   |
| 1.52E-06 | MAG, NFASC, KCNA1, KIF13B, NCMAP, EF    | 17.2798493      | 6.34E-04   |
| 1.72E-06 | ITGB1, SPON2, ITGB5, TNFAIP6, ITGB4, HI | 2.55051132      | 0.00375827 |
| 1.96E-06 | ITGB1, CYFIP1, ITGB5, ITGB4, LIMK2, ARP | 3.49432076      | 4.42E-04   |
| 2.13E-06 | CDKN1A, CDKN1B, RTKN, RNF13, WWC2,      | 1.70197107      | 8.89E-04   |
| 2.86E-06 | MOBP, PLP1, MAL, MBP, NCMAP             | 35.971134       | 0.00187564 |
| 3.13E-06 | SPON2, CYFIP1, ATP8A1, PLEKHB1, ZDHH    | 1.38891475      | 0.00205282 |
| 4.82E-06 | DOCK9, SLC3A2, CAPG, BZW2, NDRG1, TJ    | 3.65747927      | 0.01048253 |
| 7.47E-06 | FAAH, ATP8A1, CLSTN1, AATK, FMN2, LC    | 1.79123803      | 0.0031159  |
| 2.88E-05 | ITGB1, SHC4, CYFIP1, ITGB4, KCNA1, CLST | 2.06285507      | 0.01196853 |
| 3.35E-05 | MAG, CDH1, MPDZ, NCMAP, SIRT2, JAME     | 14.8112994      | 0.01391445 |
| 4.04E-05 | ITGB1, GPM6A, MYO1B, DAG1, FSCN1, IT    | 5.2897498       | 0.01674091 |
| 6.25E-05 | SEMA5A, EPHB6, ITGB1, SEMA6C, LIMK2,    | 3.84646162      | 0.01403437 |
| 6.70E-05 | SHC4, ITGB1, JUN, ITGB5, ITGB4, CAV2, C | 3.08194751      | 0.01503343 |
| 7.47E-05 | GAL3ST1, SAMD8, UGT8A, INSIG1, HMG      | 2.29866344      | 0.15079443 |
| 7.73E-05 | ITGB1, CD151, SHROOM2, LAMB1, GFRA:     | 3.23821463      | 0.15555915 |
| 8.72E-05 | SHC4, JUN, PRKCD, ITPR3, KRAS, ADCY1, I | 4.33988526      | 0.01950822 |
| 1.02E-04 | ITGB1, CD151, ITGB5, NOV, CD9, ITGA6, C | 4.31653608      | 0.06498574 |
| 1.27E-04 | SEMA5A, CYFIP1, GPM6A, SEMA3B, BZW      | 2.41261895      | 0.24192728 |
| 1.38E-04 | CAP1, PDLIM2, MOBP, CDH1, SHROOM2,      | 6.88897648      | 0.05605554 |
| 1.68E-04 | TJP1, TCF7L2, CDH1, CTNNA3, FYN, BAI    | 4.92255504      | 0.03735945 |
| 1.92E-04 | SEPT11, FZD3, MME, HEPACAM, KCNA1,      | 2.40183234      | 0.07724064 |
| 2.01E-04 | CYFIP1, GPM6A, AHCY, PEBP1, PPP1R9A,    | 2.29222491      | 0.08063823 |
| 2.21E-04 | USP6NL, FAAH, GAL3ST1, ATP8A1, GALN     | 1.68027347      | 0.08835083 |
| 3.26E-04 | ITGB1, MAGI2, PRKCA, ADCY1, FGF1, RHC   | 2.81551746      | 0.07096147 |
| 3.79E-04 | IVNS1ABP, GAS2L3, ARPC1A, FMN2, ARP     | 2.94752228      | 0.14661714 |
| 3.98E-04 | ITGB1, RAB2A, TMED10, AHCY, PDCD6IP,    | 4.03277955      | 0.15323336 |
| 4.66E-04 | PTPRE, SOCS3, GRB14, PRKCD, PRKCA, YB   | 6.88313666      | 0.63946419 |
| 4.86E-04 | CYP39A1, SULT1A1, CYB5R3, NPC1, HMG     | 4.33122545      | 0.65444928 |
| 4.98E-04 | SPAG9, ITGB1, SEMA6C, TNFAIP6, ATP8A    | 2.86756995      | 0.66393285 |

|            |                                         |            |            |
|------------|-----------------------------------------|------------|------------|
| 5.67E-04   | ITGB1, FZD3, CDKN1A, ITGB5, CAV2, CAV   | 2.79348936 | 0.12032618 |
| 5.67E-04   | GLTP, UNC119B, FAAH, PLEKHA1, OSBPLE    | 2.53130202 | 0.31076209 |
| 5.79E-04   | ITPKB, JUN, FUS, CHP2, FOSB, ADCY1, FO  | 5.49166698 | 0.71844667 |
| 6.21E-04   | SEMA5A, SEMA6C, RYK, SEMA4C, SEMA3      | 8.39591395 | 0.74310568 |
| 7.45E-04   | CYB5R3, HMGCS1, INSIG1, SC5D, DHCR24    | 8.08495417 | 0.804234   |
| 7.67E-04   | ITGB1, RELN, ITGB5, ITGB4, DAG1, SPP1,  | 4.02754504 | 0.15925241 |
| 8.87E-04   | ELOVL1, SPTLC2, B3GNT5, ELOVL6, ELOVI   | 7.79620581 | 0.85646925 |
| 8.91E-04   | SLC48A1, ITGB1, PLEKHF1, CDKN1B, RNF    | 1.97393237 | 0.31106329 |
| 9.37E-04   | FAAH, TMED10, CLSTN1, ITPR3, FMN2, H    | 1.8253362  | 0.32424691 |
| 9.61E-04   | EPHB6, ITGB1, ITGB5, ITGB4, H2-DMA, KC  | 1.88379007 | 0.33096539 |
| 0.00100475 | MYL6, CAV1, CFL2, MYH14, FLNB, CASQ1    | 5.01824742 | 0.88902924 |
| 0.00101098 | JUN, CDKN1A, ITPR3, PRKCA, FOS, ADCY1   | 3.07167435 | 0.20435163 |
| 0.0010247  | ITGB1, JUN, CDKN1A, SON, GADD45B, DC    | 3.57326099 | 0.89377251 |
| 0.0010888  | MYL6, MYO1B, MME, MYO6, MYH14, ITP      | 4.32797711 | 0.36578332 |
| 0.00126035 | CDKN1C, CDKN1A, CDKN1B, ATXN1, DYN      | 10.1061927 | 0.93658945 |
| 0.00131609 | ITGB1, SHC4, CYFIP1, KCNA1, CLSTN1, PP  | 1.97972814 | 0.42333055 |
| 0.00146591 | TJP1, CDH1, SHROOM2, CLDN19, RHOA       | 9.74427594 | 0.45838396 |
| 0.00158894 | ITGB1, TCF7L2, RALBP1, JUN, FZD3, CDKN  | 2.06373447 | 0.30189493 |
| 0.00167291 | ITGB1, CYFIP1, SWAP70, ARPC5, PPP1R9/   | 2.93516605 | 0.5033471  |
| 0.00196231 | ITGB1, CADM3, H2-DMA, PTPRF, MAG, N     | 2.84414291 | 0.35848122 |
| 0.00208545 | ITGB1, MOG, CAV2, PLLP, CAV1, PRKCA, /  | 2.40259628 | 0.58214898 |
| 0.00219863 | SEMA4C, MAGI2, CLSTN1, ADAM10, BAI/     | 2.47887857 | 0.60149725 |
| 0.00227025 | RAB2A, RALBP1, DOCK9, RAP1GDS1, ARL     | 2.46659619 | 0.99306161 |
| 0.00233476 | GAMT, GATM, SMOX, CARNS1, ODC1, LA      | 5.06319947 | 0.41037686 |
| 0.00240586 | SEMA5A, SEMA6C, SEMA4C, SEMA3B, SE      | 8.56455572 | 0.79405559 |
| 0.00250355 | MYO1B, SWAP70, FSCN1, SHROOM2, FM       | 6.23696465 | 0.99583951 |
| 0.00260206 | ITGB1, TCF7L2, ITGB5, ITGB4, LMNA, DAC  | 4.23192792 | 0.44502514 |
| 0.00271204 | JUN, FZD3, CDKN1A, CDKN1B, HMGCS1, /    | 2.14644801 | 0.99736607 |
| 0.00275034 | TJP1, TUBA1B, ITPR3, KRAS, PRKCA, ADCY  | 3.70908799 | 0.463363   |
| 0.00324944 | SRGN, RAB2A, NDFIP2, FAAH, TMED10, G    | 2.02139322 | 0.74346152 |
| 0.0032649  | ITGB1, CADM3, HEPACAM, PRKCD, SHRO      | 2.57908199 | 0.74511911 |
| 0.00375186 | ALAD, MT2, MT1, MT3                     | 12.1274313 | 0.99973098 |
| 0.00381379 | KCNA1, AATK, ITPR3, YBX1, PPP1R9A, CLC  | 1.88919636 | 0.79754    |
| 0.00394848 | TJP1, MYO1B, FZD3, CDH1, MYO6, SPP1,    | 3.2198477  | 0.80866567 |
| 0.0039907  | CTSA, SLC48A1, ABCA2, PLEKHF1, RNF13,   | 2.12548859 | 0.81202536 |
| 0.00402136 | ITGB1, FUT8, ITGB5, ITGB4, PLP1, ITGA6, | 3.52086714 | 0.99985113 |
| 0.00419735 | PLLP, PMP22, MBP                        | 27.7711864 | 0.82764227 |
| 0.00438621 | GNG2, FYN, ITPR3, KRAS, PRKCA, ADCY1,   | 3.13649525 | 0.62970837 |
| 0.00441149 | FTL1, FTH1, MT2, ATP1B3, MT1, CLCN2     | 5.45267636 | 0.63182693 |
| 0.00465335 | JUN, GADD45B, PRKCA, FOS, FGF1, MAPK    | 2.25927626 | 0.65149774 |
| 0.00484756 | CDKN1C, SOCS3, CDKN1A, CDKN1B, CAM      | 4.41750769 | 0.95873469 |
| 0.00492165 | MUSK, PELI2, PRKCA, FGF1, MT3, CYR61,   | 2.57048815 | 0.9999794  |
| 0.00498972 | ATP8A1, CDH1, FNBP1, CPD, CLTB, STX6,   | 2.70938404 | 0.87642717 |

|                                                    |            |            |
|----------------------------------------------------|------------|------------|
| 0.00517817 RYK, SEMA4C, SEMA3B, SEMA4G, RHOA       | 6.99659495 | 0.99998828 |
| 0.00553066 ITGB1, TIAM1, ITGB5, ITGB4, EPDR1, ITG/ | 3.73151731 | 0.9999946  |
| 0.00559561 GPM6A, KCNA1, PEBP1, ITPR3, PPP1R9A,    | 1.80287353 | 0.90420394 |
| 0.00583067 CAP1, GAS2L3, FMNL2, IQSEC1, ELMO1, F   | 2.8183467  | 0.99999721 |
| 0.00610055 TJP1, JUN, ARPC1A, FLNB, FOS, ARPC5, W  | 3.63511757 | 0.74916176 |
| 0.00616495 USP6NL, RALBP1, JUN, STARD8, ARHGAP:    | 2.29602983 | 0.98269437 |
| 0.00618792 SEMA5A, SEMA6C, SEMA4C, SEMA3B, SE      | 6.66132111 | 0.9829548  |
| 0.00628288 ITGB1, CYFIP1, GPM6A, UNC119B, CNP, K   | 1.66419095 | 0.9282472  |
| 0.00639511 TIAM1, GPM6A, KIF5B, AATK, MAPK8IP1     | 6.61218725 | 0.93155597 |
| 0.00679058 HMGC51, H3F3B, KCNA1, SHROOM2, AAT      | 2.35811163 | 0.99999966 |
| 0.00687089 NFASC, SIRT2, JAM3                      | 22.2169492 | 0.94397422 |
| 0.00707908 SHC4, ITGB1, ST13, SHROOM2, ARL1, CAF   | 2.11594906 | 0.99053726 |
| 0.00740662 CDKN1A, CDKN1B, YBX1, FMN2, RNF7, HI    | 1.73555112 | 0.99999991 |
| 0.00755811 NDUFA13, CDKN1A, CDKN1B, NOV, SERT/     | 2.9105835  | 0.99999994 |
| 0.00761192 SHC4, PRKCD, STK39, DCLK3, PRKCA, ADC   | 1.91007042 | 0.99999994 |
| 0.00803841 SHC4, RTKN, 1810011O10RIK, PLEKHF1, E   | 1.72337181 | 0.99999998 |
| 0.00810017 FKBP1A, NDFIP2, GPRC5B, PINK1, TRIM13   | 2.68594115 | 0.99999998 |
| 0.00822186 FAAH, GNG2, ITPR3, PRKCA, ADCY1, PLCB   | 3.09690842 | 0.84523093 |
| 0.00826706 RTKN, CDC42EP3, CDC42EP1, BAIAP2, CTI   | 4.74551658 | 0.99999999 |
| 0.00831252 SPAG9, ST13, KCNA1, CAV1, AK3, ITPR3, S | 2.40086202 | 0.99999999 |
| 0.00864214 BNIP3L, PINK1, RHOT1, CYB5R3, SLC44A1   | 2.66216166 | 0.97343381 |
| 0.00907858 RTKN, CDC42EP3, CDC42EP1, STXBP6        | 8.99278351 | 0.9974781  |
| 0.00908532 LIMK2, CFL2, PRKCD, ARPC1A, PRKCA, AR   | 3.37546632 | 0.87288543 |
| 0.00919472 ITGB1, H2-DMA, H2-DMB1, ITGA6, LAMB     | 3.03791968 | 0.87601807 |
| 0.00934117 CDKN1A, CNP, CDH1, PEBP1, MBP, FOS, S   | 3.38439942 | 1          |
| 0.00987771 EGR1, CDKN1A, CDKN1B, TRIM13, LZTS2,    | 4.54778672 | 1          |
| 0.01014986 ITGB1, JUN, CDKN1A, CDKN1B, CAV2, CA'   | 1.89491113 | 1          |
| 0.01023527 ITPR3, KRAS, PRKCA, ADCY1, PLCB1, RAPC  | 3.75904203 | 0.90222537 |
| 0.0104685 ELOVL1, ELOVL6, ELOVL7                   | 18.1911469 | 1          |
| 0.0104685 NFASC, UGT8A, CD9                        | 18.1911469 | 1          |
| 0.01075853 SEMA5A, SEMA6C, SEMA4C, SEMA3B, SE      | 4.45497475 | 1          |
| 0.01094778 CYB5R3, HMGC51, INSIG1, DHCR24, HMC     | 5.6847334  | 1          |
| 0.01117453 ABCA2, CYB5R3, NPC1, HMGC51, INSIG1,    | 3.27031854 | 1          |
| 0.01150047 TJP1, GJC3, GJB1, NOV, TJP2             | 5.6103407  | 0.99205373 |
| 0.01159548 JUN, PRKCD, ITPR3, KRAS, PRKCA, ADCY1,  | 3.22203603 | 0.92834493 |
| 0.01225038 SHC4, RALBP1, PRKCA, RASAL2, FGF1, RH   | 2.16678405 | 0.9383131  |
| 0.01267805 JUN, MAT2A, FOSB, PEBP1, FOS, JUNB      | 4.28026985 | 1          |
| 0.01281189 MYL6, MYO1B, MYO6, MYH14, MYL9, MY      | 4.27249022 | 0.99543789 |
| 0.01302329 TJP1, CLDN19, MYH14, MPDZ, MYL9, RHC    | 3.15043523 | 0.94831554 |
| 0.01352698 SEMA5A, SEMA6C, SEMA4C, SEMA3B, SE      | 5.35033732 | 1          |
| 0.01391586 ITGB1, TIAM1, GPRC5B, RELN, P2RY2, MA   | 2.6363981  | 1          |
| 0.01433452 TIAM1, CYFIP1, ELMO1, WASF2             | 7.65943027 | 1          |
| 0.01438081 FGF7, CDKN1A, CDH1, KRAS, FGF1, MAPK    | 3.49432076 | 0.96213236 |

|            |                                        |            |            |
|------------|----------------------------------------|------------|------------|
| 0.01439139 | ELOVL1, ELOVL6, ELOVL7                 | 15.5924116 | 1          |
| 0.01439139 | ELOVL1, ELOVL6, ELOVL7                 | 15.5924116 | 1          |
| 0.01439139 | ELOVL1, ELOVL6, ELOVL7                 | 15.5924116 | 1          |
| 0.01453133 | ITGB1, BLOC1S1, CDH1, CLMN, RYK, EFHC  | 2.61743121 | 1          |
| 0.01470483 | ELOVL1, ELOVL6, ELOVL7                 | 15.4162003 | 0.99993981 |
| 0.01470483 | ELOVL1, ELOVL6, ELOVL7                 | 15.4162003 | 0.99993981 |
| 0.01470483 | ELOVL1, ELOVL6, ELOVL7                 | 15.4162003 | 0.99993981 |
| 0.01470483 | ELOVL1, ELOVL6, ELOVL7                 | 15.4162003 | 0.99993981 |
| 0.01476258 | RAB2A, SPAG9, TMED10, FNBP1, RHOBTE    | 2.22051558 | 1          |
| 0.01539356 | GNG2, ITPR3, PRKCA, ADCY1, PLCB1, SLC  | 2.77375275 | 0.96998321 |
| 0.01591068 | ITGB1, CD151, ITGB4, DAG1, ITGA6, LAM  | 3.05387617 | 0.99877417 |
| 0.01621264 | ITGB4, FNBP1, CAV1, SHROOM2, FLNB, FI  | 2.57140615 | 0.99892175 |
| 0.01643067 | GAS2L3, SHROOM2, DYNLL1, NDRG1, MT     | 1.92501598 | 0.99901717 |
| 0.01652695 | CDH1, ITGA6, CD47, FSTL3               | 7.27645875 | 1          |
| 0.01663542 | GAMT, CNP, MYO6, FSCN1, KIF13B, FMN    | 3.41049658 | 0.99909908 |
| 0.01704811 | FUT8, ARHGAP31, PDCD6IP, MICAL1, ELM   | 2.74356107 | 0.99998738 |
| 0.01736376 | ITGB1, JUN, CFL2, FOS, GNAI1, RHOA, MA | 3.35265911 | 0.98091169 |
| 0.01773591 | ITGB1, CLDN19, CTNNA3, PRKCA, MYL9, C  | 2.70323362 | 0.98247782 |
| 0.01884301 | FA2H, PRX, NDRG1                       | 13.6433602 | 1          |
| 0.01884301 | FZD3, RYK, DAG1                        | 13.6433602 | 1          |
| 0.01889649 | CDKN1A, FOSB, PEBP1, FOS               | 6.92996072 | 1          |
| 0.01904011 | ITGB1, TIAM1, GPM6A, SEPT11, SIPA1L1,  | 2.50190869 | 0.99967624 |
| 0.02000972 | GNG2, ITPR3, PRKCA, ADCY1, FOS, PLCB1  | 2.89325684 | 0.98962186 |
| 0.02058062 | DRP2, RELN, FUS, KCNA1, KCNK1, CLCN2,  | 2.46854991 | 0.99983215 |
| 0.02103685 | TCF7L2, FZD3, KRAS, PRKCA, ADCY1, PLCE | 2.86403203 | 0.9918117  |
| 0.02144397 | NR4A2, CDKN1A, ITGA6, FOS              | 6.6149625  | 1          |
| 0.02302778 | ITGB1, CNP, SIRT2                      | 12.3427495 | 0.99994101 |
| 0.02302778 | ITGB1, ITGB4, ITGA6                    | 12.3427495 | 0.99994101 |
| 0.02317124 | SPTLC2, FYN, KRAS, PRKCA, PLCB1, GNAI1 | 2.57243199 | 0.99500004 |
| 0.02320017 | JUN, SLC44A1, KRAS, CHPT1, PRKCA, FOS, | 2.80731852 | 0.99503339 |
| 0.02326886 | BNIP3L, PINK1, LMNA, FMN2, S100B, NDI  | 2.82580922 | 1          |
| 0.02345566 | PLEKHA1, MAGI2, DAG1, PRKCDBP, PHLD    | 4.54778672 | 1          |
| 0.02365233 | FAAH, PLEKHB1, ODC1, HMGCRC, PPP1R9/   | 1.4875281  | 0.99999985 |
| 0.02379151 | PLP1, ELOVL6, QK                       | 12.1274313 | 1          |
| 0.02379151 | CFL2, MICAL1, MICAL3                   | 12.1274313 | 1          |
| 0.02429977 | ABHD12, FAAH, MGLL                     | 11.990378  | 0.9999999  |
| 0.02438177 | CAP1, ARHGAP10, TAGLN, FMNL2, UGT8/    | 2.79863798 | 1          |
| 0.02464665 | SCCPDH, ZFYVE19, TACC1, MAPRE3, LZTS   | 2.56349413 | 0.99997051 |
| 0.02510012 | KRAS, ATP1B3, PRKCA, SGK1, MAPK3       | 4.43029954 | 0.99680137 |
| 0.02547173 | RAB2A, CTSA, SLC48A1, ABCA2, RNF13, H  | 2.05712492 | 0.99997929 |
| 0.0256561  | RNF128, LAMP1, H2-DMA, MAGI2, MVB1     | 2.54392548 | 0.99998087 |
| 0.0256561  | TJP1, MAGI2, PMP22, SHROOM2, CLDN1!    | 2.54392548 | 0.99998087 |
| 0.0258873  | TJP1, CFL2, CASQ1, CRYAB               | 6.17137476 | 0.99998268 |

|                                                   |            |            |
|---------------------------------------------------|------------|------------|
| 0.0262884 MYL6, PRKCD, ITPR3, PRKCA, ADCY1, PLC   | 2.51166588 | 0.99757195 |
| 0.02637984 TIAM1, CYFIP1, RALBP1, CAV1, MAP3K11   | 4.38672366 | 0.99999998 |
| 0.02693679 CDKN1C, TMED10, MME, CUX1, TIPARP, I   | 2.51877418 | 1          |
| 0.0273532 EPHB6, USP6NL, ATP8A1, CLSTN1, LDLRA    | 1.15475868 | 0.99999077 |
| 0.0275332 VIT, ITGB1, SPP1, ITGA6, CYR61          | 4.33122545 | 1          |
| 0.02780059 ITPR3, KRAS, PRKCA, PLCB1, GNAI1, MAP  | 3.48613734 | 0.99829113 |
| 0.02787057 EGR1, JUN, TEAD1, DDN                  | 5.995189   | 0.99999999 |
| 0.02827753 FTL1, LAMP1, FTH1                      | 11.1084746 | 0.9999938  |
| 0.02879871 ITGB1, ITGB5, ITGB4, LMNA, DAG1, ITGA6 | 2.98911776 | 0.99864515 |
| 0.02884322 ITGB1, ITGB5, ITGB4, ITGA6             | 5.92451977 | 0.99999514 |
| 0.02911267 ITGB1, ATXN1, NPTN, KRAS, HMGCR, SGK   | 3.46498036 | 1          |
| 0.02920642 ITGB1, NPC1, CD9                       | 10.9146881 | 1          |
| 0.03088411 VAMP8, ITGB1, FYN, ITPR3, ADCY1, PLCB1 | 2.43497379 | 0.99916649 |
| 0.03089459 GPRC5B, CDKN1A, RELN, DAG1, PPP1R9A    | 3.41084004 | 1          |
| 0.03160376 VAMP8, RNF13, NPC1, H2-DMA, H2-DME     | 2.94542886 | 0.99999852 |
| 0.03218122 PDCD6IP, IQSEC1, CAV2, CAV1, ARPC1A, I | 1.90112471 | 0.99938418 |
| 0.03252025 JUN, CAV1, ECSCR, PRKCA, FGF1, SAT1, H | 1.97895322 | 1          |
| 0.03256567 NR4A2, NRBP2, JUN, PINK1, FYN, KRAS, M | 2.27389336 | 1          |
| 0.0327435 ALAD, GATM, ACSL1, SPP1, CASQ1, SLC6A   | 3.35836558 | 1          |
| 0.03332817 TCF7L2, JUN, KRAS, FOS, RHOA, MAPK3    | 3.32272465 | 0.99952895 |
| 0.03332817 ITGB1, JUN, H2-DMA, H2-DMB1, FOS, M    | 3.32272465 | 0.99952895 |
| 0.03395757 VAMP8, MYL6, NPC1, LAMP1, KIF5B, MVI   | 2.25782004 | 0.99999946 |
| 0.03439541 FGF7, YBX1, FGF1, SIRT2, FGF4          | 4.04247708 | 1          |
| 0.03440486 SEPT11, PDLIM2, FSCN1, MYH14, FLNB, M  | 3.31596256 | 0.99999956 |
| 0.03444824 ITGB1, TCF7L2, MUSK, CAV2, CAV1, PRKC  | 1.65765595 | 1          |
| 0.03505851 NRBP2, PINK1, NPC1                     | 9.92244375 | 1          |
| 0.03517526 SHC4, JUN, CDKN1A, CDKN1B, KRAS, PRK   | 2.85168706 | 0.99969426 |
| 0.03517526 GNG2, PRKCA, ADCY1, SLC6A1, SLC38A2,   | 2.85168706 | 0.99969426 |
| 0.03580666 RNF13, DHH, OTUD7B, ZDHHC8, RNF7, C    | 1.37192232 | 1          |
| 0.03634519 TIAM1, CAV2, S100A6, FYN, KRAS, RHOA   | 3.2671984  | 0.99999981 |
| 0.03684566 FRMD3, LIMCH1, MYH14, LURAP1           | 5.38996945 | 1          |
| 0.03684566 IVNS1ABP, NDUFA13, VDAC2, MAPK8IP1     | 5.38996945 | 1          |
| 0.03791888 ITGB1, CDKN1A, CDKN1B, ITGB5, ITGB4, I | 1.7165833  | 0.99983936 |
| 0.04081931 EGR1, JUN, MUSK, MAP3K11, PTPRF, RHC   | 3.16367772 | 1          |
| 0.04131985 NPEPL1, CDH1, LAP3                     | 9.09557344 | 1          |
| 0.04131985 ELOVL1, ELOVL6, ELOVL7                 | 9.09557344 | 1          |
| 0.04131985 SULT1A1, PLEKHA1, TIPARP               | 9.09557344 | 1          |
| 0.04217705 S100A6, FGF1, S100B                    | 8.99278351 | 1          |
| 0.04217705 DAG1, UTRN, SORBS3                     | 8.99278351 | 1          |
| 0.04217705 CDKN1C, CDKN1A, CDKN1B                 | 8.99278351 | 1          |
| 0.04239316 ITGB1, CYFIP1, CDKN1A, CDKN1B, TMED1   | 1.70812648 | 1          |
| 0.04256379 MYO1B, CDH1, FYN, MBP, RHOA, RAPGEF    | 3.12914777 | 0.99999999 |
| 0.04275207 ITGB1, LDHB, TIAM1, CAV1, PRKCD, WW    | 2.73693411 | 1          |



|            |                                        |            |            |
|------------|----------------------------------------|------------|------------|
| 0.04344108 | CYFIP1, MYO6, FSCN1, S100A6, BAIAP2, S | 2.72839726 | 0.99999999 |
| 0.04422972 | PINK1, MT3, CRYAB, SIRT2               | 5.01824742 | 1          |
| 0.04422972 | ALAD, CDKN1B, NPC1, MT1                | 5.01824742 | 1          |
| 0.04495531 | RELN, MUSK, NPTN, ITPR3, S100B         | 3.71247896 | 1          |
| 0.04669765 | TCF7L2, CDH1, KRAS, MAPK3              | 4.88860639 | 0.99997976 |
| 0.04725253 | SLC48A1, ABCA2, MYO1B, GRB14, LAMP1    | 2.42808187 | 1          |
| 0.04796365 | DCLK3, OTUD7B, LZTS2                   | 8.39591395 | 1          |
| 0.04845248 | SBSPON, VIT, SPON2, LAMB1, FGF1, HSPC  | 1.75767003 | 1          |
| 0.04894892 | SPAG9, KIF5B, MAPK8IP1                 | 8.30103093 | 1          |
| 0.04894892 | MYL6, MYO1B, MYH14                     | 8.30103093 | 1          |
| 0.04912876 | SHC4, TIAM1, GNG2, PRKCD, ELMO1, KR/   | 1.98911408 | 0.99998864 |
| 0.05084098 | EGR1, EGR2, LAMB1, PRKCA, S100B        | 3.56689155 | 1          |
| 0.05122548 | ITPR3, ATP1B3, PRKCA, ADCY1, PLCB1, GI | 2.95353303 | 0.9999931  |
| 0.05247066 | ELOVL1, FA2H, SC5D, ELOVL6, ELOVL7, M  | 2.94991571 | 1          |
| 0.05276155 | TIAM1, KIF19A, GAS2L3, KIF5B, MAP6, CC | 1.97841237 | 1          |
| 0.05295286 | EGR2, JUN, CDKN1A, CDKN1B, KRAS, PRK   | 2.18480525 | 0.99999543 |
| 0.05317989 | SEMA5A, SEMA6C, NFASC, RELN, RYK, KIF  | 2.19758821 | 1          |
| 0.05318583 | FTL1, FTH1                             | 37.0282486 | 1          |
| 0.05328077 | TRIM13, CAPN2, ADAM10                  | 7.9346247  | 1          |
| 0.05328077 | CNP, CAPN2, MAPK3                      | 7.9346247  | 1          |
| 0.05371521 | TMED10, ATP8A1, UGT8A, CLTB, YBX1, H   | 1.42985248 | 1          |
| 0.05374685 | BACE2, CLSTN1, LDLRAD3, ITM2A          | 4.64143665 | 1          |
| 0.05411023 | GAL3ST1, UGT8A                         | 36.3822938 | 1          |
| 0.05411023 | GAMT, GATM                             | 36.3822938 | 1          |
| 0.05411023 | CDKN1C, CDKN1B                         | 36.3822938 | 1          |
| 0.05471738 | CYP39A1, CYP7B1                        | 35.971134  | 1          |
| 0.05496434 | CDKN1A, CDKN1B, MAGI2                  | 7.79620581 | 1          |
| 0.05496434 | EGR1, PLCB1, MAPK3                     | 7.79620581 | 1          |
| 0.05501042 | ITGB1, FUT8, JUN, ITGB5, FOS, DUSP15   | 2.9105835  | 1          |
| 0.05749275 | TCF7L2, CDH1, CTNNA3, KRAS, MAPK3      | 3.40792272 | 0.99999846 |
| 0.05969442 | FGF7, NOV, ADAMTSL5, SERPIND1, OGN,    | 2.14397488 | 1          |
| 0.06172468 | EGR1, TCF7L2, CDH1, FRZB, CAV1, LZTS2, | 2.49682408 | 1          |
| 0.06210161 | ITGB1, TIAM1, PLEKHA1, MYO6, RHOA, A   | 2.81227204 | 1          |
| 0.06229741 | MAG, DAG1, NCMAP                       | 7.27645875 | 1          |
| 0.06229741 | ITGB1, NOV, ITGA6                      | 7.27645875 | 1          |
| 0.06229741 | ELOVL1, ELOVL6, ELOVL7                 | 7.27645875 | 1          |
| 0.06229741 | ITGB1, ITGB5, RHOA                     | 7.27645875 | 1          |
| 0.06462156 | BNIP3L, MLIP, NPC1, CAV2, LMNA, S100A  | 2.10920403 | 1          |
| 0.06510111 | FUT8, ST6GAL1, GALNT16, UGT8A, TIPAR   | 1.90231959 | 1          |
| 0.06559812 | EGR1, RELN, ADCY1, SGK1                | 4.28026985 | 1          |
| 0.06652811 | PCDH9, FSCN1, MYH14, ARPC5, UTRN, PF   | 2.0959386  | 1          |
| 0.06653533 | SPAG9, ITGB1, CAV2, RYK, PRKCD, PELI2, | 2.44880823 | 1          |
| 0.06783766 | NFASC, CDH1, DAG1                      | 6.94279661 | 1          |

|                                                   |            |            |
|---------------------------------------------------|------------|------------|
| 0.06841931 MYL6, MYO1B, MYO6, MYH14, DYNLL1, M    | 2.73198486 | 1          |
| 0.06993944 JUN, NREP, JAM3                        | 6.82168008 | 1          |
| 0.06993944 DAG1, POU3F1, SIRT2                    | 6.82168008 | 1          |
| 0.07034645 CAV1, CD47, BAIAP2, RNF5               | 4.15797643 | 1          |
| 0.07060165 JUN, CAV1, PRKCD, PEBP1, DHCR24, LAM   | 1.59247208 | 1          |
| 0.07073034 CAV1, H2-DMA, H2-DMB1, DAG1, FYN, CI   | 2.69182757 | 0.99999994 |
| 0.07073034 ITGB1, ITGB5, ITGB4, LMNA, DAG1, ITGA( | 2.69182757 | 0.99999994 |
| 0.07088573 HSPB2, PEBP1, CASQ1, HSPA1B, HSPA1A    | 3.19142928 | 1          |
| 0.07171348 CDKN1C, TCF7L2, CDKN1A, CDKN1B, HEP    | 2.69498472 | 1          |
| 0.07224503 FKBP1A, CDKN1B, ST13, FGF1             | 4.11098675 | 1          |
| 0.07379717 CLK1, PINK1, PRKCD, STK39, DCLK3, PRKC | 2.18840865 | 1          |
| 0.07524497 GAL3ST1, SAMD8, SPTLC2, UGT8A          | 4.04247708 | 1          |
| 0.07555037 TIAM1, PCDH9, JAM3                     | 6.53439681 | 1          |
| 0.07725938 DOCK10, FMNL2, RTKN, DOCK9             | 3.99679267 | 1          |
| 0.07779753 GNG2, ITPR3, KRAS, PRKCA, PLCB1, GNAI  | 2.14802402 | 0.99999999 |
| 0.07783412 MYO1B, CFL2, FSCN1, PPP1R9A, SORBS3,   | 2.63004533 | 1          |
| 0.07786804 MYO1B, MYH14, WASF2                    | 6.42040478 | 1          |
| 0.07786804 CUX1, STX6, ARL1                       | 6.42040478 | 1          |
| 0.07786804 H3F3B, SEMA4C, QK                      | 6.42040478 | 1          |
| 0.07834366 PLA2G16, FGF7, PCYT2, MBOAT1, CHPT1    | 3.08324523 | 1          |
| 0.07873967 LDHB, HMGCS1, ODC1, TALDO1, AK3, SC    | 1.82180542 | 0.99999999 |
| 0.07957385 FRMD3, STK39, MAL, GFRA1, SNX7, MGLI   | 2.61375872 | 1          |
| 0.07960801 ITGB1, TCF7L2, BNIP3L, JUN, GADD45B, P | 1.62905793 | 1          |
| 0.08005941 CAV2, CAV1                             | 24.2548625 | 1          |
| 0.08005941 FGF1, FGF4                             | 24.2548625 | 1          |
| 0.08005941 BAG5, ST13                             | 24.2548625 | 1          |
| 0.08005941 PRX, NCMAP                             | 24.2548625 | 1          |
| 0.08005941 SMOX, SAT1                             | 24.2548625 | 1          |
| 0.08094513 PDCD6IP, BICD1                         | 23.980756  | 1          |
| 0.08094513 SEMA5A, PTPRF                          | 23.980756  | 1          |
| 0.08120351 SLC25A1, MCUR1, NDUFA13, PLEKHF1, SI   | 1.22638592 | 1          |
| 0.08271687 FKBP1A, CDH1, KCNA1, PEBP1, GLUL, RA   | 2.58336618 | 1          |
| 0.08486953 RAB2A, KRAS, GNAI1, RHOA, RHOB         | 2.9975945  | 1          |
| 0.08547751 CNP, PLP1, MBP, SIRT2                  | 3.82971513 | 1          |
| 0.08588346 TJP1, GJC3, CDKN1B, CDH1, MYO6, MYH1   | 2.10911848 | 1          |
| 0.08606182 MT2, MT1, MT3                          | 6.06371563 | 1          |
| 0.08774347 ITGB1, PDLIM2, DAG1                    | 5.995189   | 1          |
| 0.08793388 VDAC2, ITPR3, ATP1B3, ADCY1, PLCB1, M  | 1.95694213 | 1          |
| 0.08820122 EGR1, EGR2, JUN, FZD3, CDKN1A, CRTC3,  | 1.66938823 | 1          |
| 0.08842848 CYFIP1, CDC42EP3, MYH14, CDC42EP1, F   | 2.09394496 | 1          |
| 0.08894059 CAV2, CAV1, FSCN1, TJP2, CNTLN         | 2.94845361 | 1          |
| 0.09023003 CYB5R3, HMGCS1, SC5D, DHCR24, HMGC     | 2.93405595 | 1          |
| 0.09080365 GJC3, GJB1, ITGB4, KREMEN1             | 3.73151731 | 1          |

|                                                 |            |   |
|-------------------------------------------------|------------|---|
| 0.09174152 BAG5, MT3, HSPA1A                    | 5.84656557 | 1 |
| 0.09437358 JUN, CAV1, FOSB, JUNB, RHOA          | 2.88748363 | 1 |
| 0.09437358 NR4A2, PINK1, PRKCD, MT3, SIRT2      | 2.88748363 | 1 |
| 0.09450032 CDKN1B, CAV1, SLAIN2                 | 5.7445727  | 1 |
| 0.09450032 CAV1, DAG1, PEBP1                    | 5.7445727  | 1 |
| 0.09450032 ITGB1, ITGA6, SORBS3                 | 5.7445727  | 1 |
| 0.09632824 TRIB2, MAP3K11, MAPK8IP1             | 5.67965274 | 1 |
| 0.09823971 SC5D, DHCR24, LIPA                   | 5.59616784 | 1 |
| 0.09971881 TJP1, VAMP8, CDH1, MPZ, P2RY2, DAG1, | 1.82405165 | 1 |



| Benjamini  | FDR        |
|------------|------------|
| 2.52E-18   | 2.30E-18   |
| 4.19E-16   | 3.83E-16   |
| 4.04E-10   | 3.69E-10   |
| 8.70E-09   | 8.66E-09   |
| 8.38E-10   | 7.66E-10   |
| 6.47E-09   | 5.91E-09   |
| 4.04E-08   | 3.69E-08   |
| 4.89E-07   | 4.47E-07   |
| 5.32E-07   | 4.87E-07   |
| 5.91E-06   | 4.98E-06   |
| 5.23E-05   | 5.19E-05   |
| 9.19E-05   | 9.12E-05   |
| 1.72E-04   | 1.71E-04   |
| 7.05E-05   | 6.44E-05   |
| 0.00188181 | 0.00187234 |
| 2.22E-04   | 1.87E-04   |
| 8.89E-05   | 8.12E-05   |
| 4.11E-04   | 4.08E-04   |
| 4.11E-04   | 4.08E-04   |
| 0.00351101 | 0.00349334 |
| 2.84E-04   | 2.59E-04   |
| 0.00100338 | 9.17E-04   |
| 0.00107784 | 9.85E-04   |
| 0.00120588 | 0.00110202 |
| 0.00380352 | 0.00320032 |
| 0.00380352 | 0.00320032 |
| 0.03379935 | 0.03362927 |
| 0.03379935 | 0.03362927 |
| 0.00395747 | 0.00332985 |
| 0.01119834 | 0.01111299 |
| 0.04613863 | 0.04590646 |
| 0.0038456  | 0.0035144  |
| 0.00637341 | 0.00536265 |
| 0.00494513 | 0.00451923 |
| 0.00494513 | 0.00451923 |
| 0.00513832 | 0.00469579 |
| 0.01055982 | 0.00888513 |
| 0.00831485 | 0.00759874 |
| 0.00831485 | 0.00759874 |
| 0.12107489 | 0.12046564 |
| 0.12107489 | 0.12046564 |
| 0.12107489 | 0.12046564 |

|            |            |
|------------|------------|
| 0.01609186 | 0.01353984 |
| 0.05315189 | 0.05274677 |
| 0.12345882 | 0.12283757 |
| 0.12345882 | 0.12283757 |
| 0.13579016 | 0.13510686 |
| 0.01935161 | 0.01628263 |
| 0.14918904 | 0.14843832 |
| 0.01746636 | 0.01596208 |
| 0.01746636 | 0.01596208 |
| 0.01746636 | 0.01596208 |
| 0.14933325 | 0.1485818  |
| 0.02294934 | 0.01930979 |
| 0.14933325 | 0.1485818  |
| 0.01896319 | 0.01733    |
| 0.17219539 | 0.1713289  |
| 0.02200495 | 0.02010979 |
| 0.02356725 | 0.02153753 |
| 0.03278991 | 0.02758975 |
| 0.0258992  | 0.02366864 |
| 0.03712029 | 0.03123337 |
| 0.03113286 | 0.02845156 |
| 0.03169066 | 0.02896132 |
| 0.29192768 | 0.29045869 |
| 0.04076842 | 0.03430295 |
| 0.19728093 | 0.19577726 |
| 0.30404181 | 0.30251186 |
| 0.04162183 | 0.03502101 |
| 0.31202684 | 0.31045671 |
| 0.04162183 | 0.03502101 |
| 0.04402343 | 0.04023194 |
| 0.04402343 | 0.04023194 |
| 0.41007783 | 0.40801431 |
| 0.04906208 | 0.04483664 |
| 0.04906208 | 0.04483664 |
| 0.04906208 | 0.04483664 |
| 0.41860481 | 0.41649838 |
| 0.05012831 | 0.04581104 |
| 0.05868386 | 0.04937717 |
| 0.05868386 | 0.04937717 |
| 0.05868386 | 0.04937717 |
| 0.35333338 | 0.35064029 |
| 0.48903338 | 0.48657255 |
| 0.05793621 | 0.05294649 |

|            |            |
|------------|------------|
| 0.49215157 | 0.48967505 |
| 0.5037509  | 0.50121601 |
| 0.06321528 | 0.0577709  |
| 0.50983391 | 0.50726842 |
| 0.07288552 | 0.06132658 |
| 0.36902505 | 0.36621236 |
| 0.36902505 | 0.36621236 |
| 0.06854243 | 0.06263925 |
| 0.06854243 | 0.06263925 |
| 0.55064141 | 0.54787057 |
| 0.07180078 | 0.06561698 |
| 0.38698982 | 0.38404021 |
| 0.55064141 | 0.54787057 |
| 0.55064141 | 0.54787057 |
| 0.55064141 | 0.54787057 |
| 0.55064141 | 0.54787057 |
| 0.55064141 | 0.54787057 |
| 0.09331811 | 0.07851876 |
| 0.55064141 | 0.54787057 |
| 0.55064141 | 0.54787057 |
| 0.0881077  | 0.08051948 |
| 0.45811888 | 0.45462712 |
| 0.09487281 | 0.0798269  |
| 0.09487281 | 0.0798269  |
| 0.59579337 | 0.59279532 |
| 0.59579337 | 0.59279532 |
| 0.59579337 | 0.59279532 |
| 0.10101765 | 0.08499723 |
| 0.59579337 | 0.59279532 |
| 0.59579337 | 0.59279532 |
| 0.59579337 | 0.59279532 |
| 0.59579337 | 0.59279532 |
| 0.59579337 | 0.59279532 |
| 0.59579337 | 0.59279532 |
| 0.59579337 | 0.59279532 |
| 0.11445707 | 0.10459952 |
| 0.10967395 | 0.09228073 |
| 0.11123345 | 0.0935929  |
| 0.64542005 | 0.64217229 |
| 0.12454344 | 0.11381721 |
| 0.11370338 | 0.09567112 |
| 0.64542005 | 0.64217229 |
| 0.64542005 | 0.64217229 |
| 0.64542005 | 0.64217229 |
| 0.12090531 | 0.1017309  |

|            |            |
|------------|------------|
| 0.64542005 | 0.64217229 |
| 0.64542005 | 0.64217229 |
| 0.64542005 | 0.64217229 |
| 0.64542005 | 0.64217229 |
| 0.56743344 | 0.56310849 |
| 0.56743344 | 0.56310849 |
| 0.56743344 | 0.56310849 |
| 0.56743344 | 0.56310849 |
| 0.64542005 | 0.64217229 |
| 0.12479776 | 0.10500605 |
| 0.14794908 | 0.13520706 |
| 0.14794908 | 0.13520706 |
| 0.14794908 | 0.13520706 |
| 0.70839035 | 0.70482572 |
| 0.14794908 | 0.13520706 |
| 0.62130897 | 0.61657338 |
| 0.13420174 | 0.11291864 |
| 0.13420174 | 0.11291864 |
| 0.76495802 | 0.76110874 |
| 0.76495802 | 0.76110874 |
| 0.76495802 | 0.76110874 |
| 0.16580765 | 0.15152757 |
| 0.14652278 | 0.12328569 |
| 0.17556533 | 0.16044487 |
| 0.14923015 | 0.12556369 |
| 0.85230053 | 0.84801174 |
| 0.18873751 | 0.1724826  |
| 0.18873751 | 0.1724826  |
| 0.15489523 | 0.13033035 |
| 0.15489523 | 0.13033035 |
| 0.88149576 | 0.87706005 |
| 0.88149576 | 0.87706005 |
| 0.79703245 | 0.79095751 |
| 0.88149576 | 0.87706005 |
| 0.88149576 | 0.87706005 |
| 0.79703245 | 0.79095751 |
| 0.88830902 | 0.88383903 |
| 0.19323017 | 0.17658834 |
| 0.16279221 | 0.13697494 |
| 0.19323017 | 0.17658834 |
| 0.19323017 | 0.17658834 |
| 0.19323017 | 0.17658834 |
| 0.19323017 | 0.17658834 |

|            |            |
|------------|------------|
| 0.16576294 | 0.13947455 |
| 0.82405603 | 0.81777511 |
| 0.96530862 | 0.96045117 |
| 0.20059011 | 0.18331441 |
| 0.97076734 | 0.96588242 |
| 0.17056035 | 0.14351113 |
| 0.8310498  | 0.82471557 |
| 0.20379324 | 0.18624167 |
| 0.17203441 | 0.14475142 |
| 0.20434691 | 0.18674766 |
| 0.99758169 | 0.99256184 |
| 0.99758169 | 0.99256184 |
| 0.17976138 | 0.15125297 |
| 1          | 0.99542334 |
| 0.22017283 | 0.20121058 |
| 0.18013084 | 0.15156383 |
| 1          | 0.99542334 |
| 1          | 0.99542334 |
| 1          | 0.99542334 |
| 0.18013084 | 0.15156383 |
| 0.18013084 | 0.15156383 |
| 0.23195534 | 0.21197833 |
| 1          | 0.99542334 |
| 0.23195534 | 0.21197833 |
| 0.96708128 | 0.95971024 |
| 1          | 0.99542334 |
| 0.18147236 | 0.1526926  |
| 0.18147236 | 0.1526926  |
| 0.96708128 | 0.95971024 |
| 0.24114746 | 0.22037878 |
| 1          | 0.99542334 |
| 1          | 0.99542334 |
| 0.19127967 | 0.16094457 |
| 1          | 0.99542334 |
| 1          | 0.99542334 |
| 1          | 0.99542334 |
| 1          | 0.99542334 |
| 0.96708128 | 0.95971024 |
| 0.96708128 | 0.95971024 |
| 0.96708128 | 0.95971024 |
| 0.96708128 | 0.95971024 |
| 0.27799478 | 0.25405265 |
| 0.96708128 | 0.95971024 |

|            |            |
|------------|------------|
| 0.27935955 | 0.25529987 |
| 1          | 0.99542334 |
| 1          | 0.99542334 |
| 1          | 0.99542334 |
| 0.23044274 | 0.19389675 |
| 0.29926605 | 0.27349194 |
| 1          | 0.99542334 |
| 0.30228564 | 0.27625147 |
| 1          | 0.99389313 |
| 1          | 0.99389313 |
| 0.23728148 | 0.19965093 |
| 1          | 0.99542334 |
| 0.24225385 | 0.20383474 |
| 1          | 0.99542334 |
| 1          | 0.99389313 |
| 0.24531223 | 0.20640809 |
| 1          | 0.99542334 |
| 0.31623883 | 0.28900295 |
| 0.31623883 | 0.28900295 |
| 0.31623883 | 0.28900295 |
| 0.31623883 | 0.28900295 |
| 1          | 0.99389313 |
| 1          | 0.99542334 |
| 1          | 0.99542334 |
| 1          | 0.99542334 |
| 1          | 0.99389313 |
| 1          | 0.99542334 |
| 1          | 0.99542334 |
| 1          | 0.99542334 |
| 0.26101708 | 0.2196223  |
| 1          | 0.99389313 |
| 1          | 0.99542334 |
| 0.36053432 | 0.32948352 |
| 1          | 0.99542334 |
| 1          | 0.99542334 |
| 1          | 0.99542334 |
| 1          | 0.99542334 |
| 0.3700248  | 0.33815663 |
| 1          | 0.99389313 |
| 1          | 0.99542334 |
| 0.3757939  | 0.34342888 |
| 1          | 0.99542334 |
| 0.37808187 | 0.3455198  |

|            |            |
|------------|------------|
| 1          | 0.99389313 |
| 1          | 0.99542334 |
| 1          | 0.99542334 |
| 1          | 0.99542334 |
| 1          | 0.99389313 |
| 0.30876516 | 0.259798   |
| 0.30876516 | 0.259798   |
| 1          | 0.99542334 |
| 1          | 0.99542334 |
| 1          | 0.99389313 |
| 1          | 0.99542334 |
| 1          | 0.99542334 |
| 0.41552702 | 0.37974001 |
| 1          | 0.99389313 |
| 0.33099823 | 0.27850511 |
| 1          | 0.99542334 |
| 1          | 0.99542334 |
| 1          | 0.99542334 |
| 1          | 0.99542334 |
| 1          | 0.99542334 |
| 0.33099823 | 0.27850511 |
| 0.43197234 | 0.39476898 |
| 1          | 0.99542334 |
| 1          | 0.99542334 |
| 1          | 0.99542334 |
| 1          | 0.99542334 |
| 1          | 0.99542334 |
| 1          | 0.99542334 |
| 1          | 0.99389313 |
| 1          | 0.99389313 |
| 0.43516755 | 0.39768901 |
| 0.43766649 | 0.39997273 |
| 1          | 0.99389313 |
| 1          | 0.99542334 |
| 1          | 0.99542334 |
| 1          | 0.99542334 |
| 1          | 0.99389313 |
| 0.35752996 | 0.30082917 |
| 0.35752996 | 0.30082917 |
| 1          | 0.99542334 |
| 1          | 0.99389313 |
| 1          | 0.99542334 |
| 1          | 0.99542334 |

|            |            |
|------------|------------|
| 0.47934942 | 0.43806573 |
| 1          | 0.99542334 |
| 1          | 0.99542334 |
| 1          | 0.99542334 |
| 1          | 0.99542334 |
| 1          | 0.99542334 |
| 1          | 0.99389313 |
| 0.39123533 | 0.3291892  |
| 0.51459828 | 0.47027881 |
